# Supplementary material for: A Bioinspired C–O/C–X σ-Bond Metathesis
Source: Research Square preprint supplement (doi:10.21203/rs.3.rs-4160655/v1), 2024-04-18
Supplement: Supplementary file 1 [file 63874af9e310319c693d1779.pdf]

## Supporting Information for

### A Bioinspired C–O/C–X $\sigma$ -Bond Metathesis

Hongmei Liu,<sup>1</sup> Yuzhu Zheng,<sup>1</sup> Ke-Lin Xian,<sup>1</sup> Qi-Qi Hu,<sup>1</sup> Rong-zhen Liao,<sup>1</sup> & Youwei Xie<sup>1\*</sup>

<sup>1</sup>Hubei Key Laboratory of Bioinorganic Chemistry and Materia Medica; School of Chemistry and Chemical Engineering, Huazhong University of Science and Technology, 1037 Luoyu Road, Wuhan, 430074, China

\*e-mail: rongzhen@hust.edu.cn, xieyw@hust.edu.cn

#### Table of Contents

|                                                                      |    |
|----------------------------------------------------------------------|----|
| 1 General information .....                                          | 2  |
| 2 Optimization of reaction conditions <sup>a</sup> .....             | 3  |
| 3 Syntheses of starting materials and spectroscopic data .....       | 5  |
| 4 C–O/C–S $\sigma$ -bond metathesis of alcohols with thioethers..... | 9  |
| 5 Synthetic applications of C–O/C–S $\sigma$ -bond metathesis.....   | 29 |
| 6 Mechanistic experiments .....                                      | 32 |
| 7 DFT calculations .....                                             | 35 |
| 8 References .....                                                   | 39 |
| 9 NMR spectroscopic data.....                                        | 42 |
| 10 Cartesian coordinates of all optimized structures.....            | 97 |

## 1 General information

All chemicals used in this manuscript were purchased from Energy chemical company, Bide Pharmatech Ltd, Inno-Chem Ltd, Adamas Company, Alfa Aesar Company and Cambridge Isotope Laboratories, Inc. Other commercially available compounds were used as provided without further purification. Unless otherwise noted, all reactions were performed under air. Reactions were monitored by thin layer chromatography (TLC) on silica gel pre-coated plastic sheets (0.2 mm). Visualization was accomplished by irradiation with UV light at 254 nm and KMnO<sub>4</sub>. Flash column chromatography was performed over silica gel (200-300 mesh). <sup>1</sup>H-, <sup>13</sup>C- and <sup>19</sup>F-NMR spectra were recorded on Bruker AV400 or Bruker Ascend™ 600MHz at room temperature. Chemical shifts were reported in ppm on the scale relative to CDCl<sub>3</sub> (δ = 7.26 for <sup>1</sup>H-NMR, δ = 77.00 for <sup>13</sup>C-NMR). Proton spectrum description analysis is as follows: chemical shift (ppm), multiplet analysis (s = singlet, d = doublet, t = triplet, q = quartet, m = multiplet), unidentified coupling the methods are all analyzed by multiple peak processing, and the carbon spectrum is described in ppm. Coupling constants (*J*) were reported in Hertz (Hz). High resolution mass spectra (HR-MS) were determined on Bruker Solarix 7.0T FT-MS (ESI source). Mass spectra (GC-MS) were determined on Agilent 7890A/5975C (EI source).

## 2 Optimization of reaction conditions

Table S1 Optimization conditions of substrate **5a**<sup>a</sup>

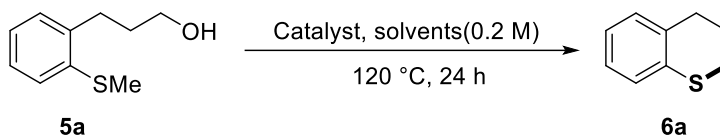

| Entry | catalyst                       | loading | solvent     | yield (%) <sup>b</sup> |
|-------|--------------------------------|---------|-------------|------------------------|
| 1     | Re <sub>2</sub> O <sub>7</sub> | 2%      | HFIP        | 7                      |
| 2     | Fe(OTf) <sub>3</sub>           | 10%     | HFIP        | 7                      |
| 3     | Bi(OTf) <sub>3</sub>           | 10%     | HFIP        | 7                      |
| 4     | Al(OTf) <sub>3</sub>           | 10%     | THF         | 27                     |
| 5     | Al(OTf) <sub>3</sub>           | 30%     | THF         | 48                     |
| 6     | Al(OTf) <sub>3</sub>           | 50%     | THF         | 56                     |
| 7     | Al(OTf) <sub>3</sub>           | 70%     | THF         | 50                     |
| 8     | Al(OTf) <sub>3</sub>           | 100%    | THF         | 38                     |
| 9     | Al(OTf) <sub>3</sub>           | 50%     | HFIP        | 29                     |
| 10    | Al(OTf) <sub>3</sub>           | 50%     | toluene     | 74                     |
| 11    | Ga(OTf) <sub>3</sub>           | 50%     | toluene     | 43                     |
| 12    | GaCl <sub>3</sub>              | 50%     | toluene     | 32                     |
| 13    | AlF <sub>3</sub>               | 50%     | toluene     | NR                     |
| 14    | AlCl <sub>3</sub>              | 50%     | toluene     | 92                     |
| 15    | AlCl <sub>3</sub>              | 50%     | cyclohexane | 95                     |
| 16    | AlCl <sub>3</sub>              | 50%     | DMSO        | 10                     |
| 17    | AlCl <sub>3</sub>              | 50%     | HFIP        | 67                     |
| 18    | TfOH                           | 50%     | cyclohexane | 62                     |

<sup>a</sup>**5a** (0.1 mmol, 18.23 mg), AlCl<sub>3</sub> (50 mol%, 6.67 mg), cyclohexane (0.2 M, 0.5mL), 120 °C, 24 hours

<sup>b</sup>1,3,5-Trimethoxybenzene as the internal standard, measured by NMR

Table S2 Optimization conditions of substrate 1a<sup>a</sup>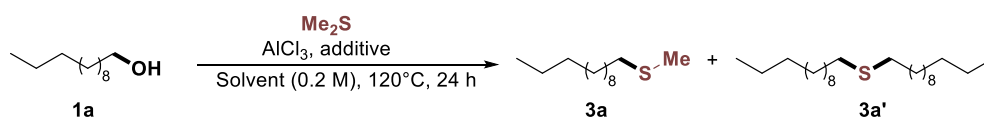

| Entry | Catalyst                | Loading    | Me <sub>2</sub> S (equiv.) | additive                    | Solvent            | yield <sup>b</sup> | ratio (A/B) <sup>c</sup> |
|-------|-------------------------|------------|----------------------------|-----------------------------|--------------------|--------------------|--------------------------|
| 1     | AlCl <sub>3</sub>       | 50%        | 2.0                        | none                        | Tol.               | 29%                |                          |
| 2     | AlCl <sub>3</sub>       | 50%        | 5.0                        | none                        | Tol.               | 41%                |                          |
| 3     | AlCl <sub>3</sub>       | 50%        | 10.0                       | none                        | Tol.               | 38%                |                          |
| 4     | AlCl <sub>3</sub>       | 50%        | as solvent                 | none                        | Me <sub>2</sub> S  | 18%                |                          |
| 5     | AlCl <sub>3</sub>       | 50%        | 5.0                        | NaCl 50%                    | Tol.               | 24%                |                          |
| 6     | AlCl <sub>3</sub>       | 50%        | 5.0                        | MgCl 50%                    | Tol.               | 33%                |                          |
| 7     | AlCl <sub>3</sub>       | 50%        | 5.0                        | ZnCl <sub>2</sub> 50%       | Tol.               | 52%                |                          |
| 8     | AlCl <sub>3</sub>       | 50%        | 5.0                        | ZnBr <sub>2</sub> 50%       | Tol.               | 56%                |                          |
| 9     | AlCl <sub>3</sub>       | 50%        | 5.0                        | ZnI <sub>2</sub> 50%        | Tol.               | 60%                |                          |
| 10    | AlCl <sub>3</sub>       | 50%        | 5.0                        | ZnI <sub>2</sub> 100%       | Tol.               | 82%                | 10/1                     |
| 11    | <b>AlCl<sub>3</sub></b> | <b>50%</b> | <b>5.0</b>                 | <b>ZnI<sub>2</sub> 100%</b> | <b>cyclohexane</b> | <b>77%</b>         | <b>25/1</b>              |
| 12    | AlCl <sub>3</sub>       | 50%        | 5.0                        | CoI <sub>2</sub> 100%       | cyclohexane        | 59%                |                          |
| 13    | AlCl <sub>3</sub>       | 50%        | 5.0                        | BiI <sub>3</sub> 100%       | cyclohexane        | 23%                |                          |
| 14    | AlCl <sub>3</sub>       | 50%        | 5.0                        | AgI 100%                    | cyclohexane        | 15%                |                          |
| 15    | AlCl <sub>3</sub>       | 50%        | 5.0                        | InI <sub>3</sub> 100%       | cyclohexane        | 63%                |                          |
| 16    | AlCl <sub>3</sub>       | 50%        | 5.0                        | NH <sub>4</sub> I 100%      | cyclohexane        | 10%                |                          |
| 17    | AlCl <sub>3</sub>       | 50%        | 5.0                        | TfOH 50%                    | cyclohexane        | 37%                |                          |
| 18    | AlCl <sub>3</sub>       | 50%        | 5.0                        | ZnI <sub>2</sub> 100%       | DCE                | 26%                |                          |
| 19    | AlCl <sub>3</sub>       | 50%        | 5.0                        | ZnI <sub>2</sub> 100%       | THF                | NP                 |                          |
| 20    | AlCl <sub>3</sub>       | 50%        | 5.0                        | ZnI <sub>2</sub> 100%       | DMSO               | NP                 |                          |
| 21    | AlCl <sub>3</sub>       | 50%        | 5.0                        | ZnI <sub>2</sub> 100%       | HFIP               | 44                 |                          |
| 22    | HCl                     | 50%        | 5.0                        | none                        | cyclohexane        | NP                 |                          |
| 23    | TfOH                    | 50%        | 5.0                        | none                        | cyclohexane        | 59%                |                          |

<sup>a</sup>**1a** (0.2 mmol, 45 uL), Me<sub>2</sub>S (1.0 mmol, 73 uL), AlCl<sub>3</sub> (50 mol%, 13.34 mg), ZnI<sub>2</sub> (100 mol%), cyclohexane (0.2 M, 1mL), 120 °C, 24 hours. <sup>b</sup>dodecane as the internal standard, measured by GC. <sup>c</sup>the ratio measured by NMR

### 3 Syntheses of starting materials and spectroscopic data

#### Method A

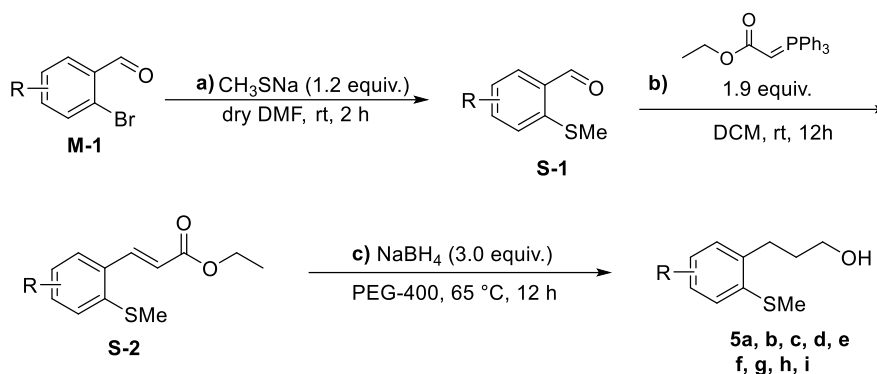

Figure S1. General synthetic method A

- a)** Following a reported procedure<sup>1</sup>, a solution of **M-1** (10 mmol) in anhydrous DMF (17 mL) was treated with NaSMe (12 mmol, 1.2 equiv.), After the solution was stirred for 1 h. The organic phase was separated and the aqueous phase was extracted with ethyl acetate (3×10 mL). The combined organic layers were dried with anhydrous Na<sub>2</sub>SO<sub>4</sub>, filtered, and concentrated under reduced pressure. The crude product **S-1** was used in the following step without further purification.
- b)** (Carbethoxymethylene)triphenylphosphorane (10 mmol, 1.9 equiv.) was added to a solution of aldehyde (**S-1**) in anhydrous DCM (10 mL) and the reaction mixture stirred at room temperature until TLC showed complete conversion of aldehyde. The reaction mixture was concentrated under reduced pressure and purified by column chromatography on silica gel (SiO<sub>2</sub>, PE/EA = 50/1) to afford  $\alpha$ ,  $\beta$ -unsaturated ester **S-2** in 98% yield.
- c)** Following a reported procedure<sup>2</sup>: to the ester **S-2** (5 mmol) in PEG 400 (30 mL) was added sodium borohydride (0.6 g, 15 mmol) portion wise. Under stirring, the solution was slowly brought to 65 °C (evolution of hydrogen) and kept at this temperature for 10 hours. During this time the reaction was generally complete. Diluted HCl (10%) was added to the reaction mixture dropwise, and the products were extracted (3 × 30 mL) with diethyl ether. Drying of the extracts with sodium sulfate and concentrated under reduced pressure, purified by column chromatography on silica gel (SiO<sub>2</sub>, PE/EA = 3/1) to afford the product in 84% yield.

## Method B

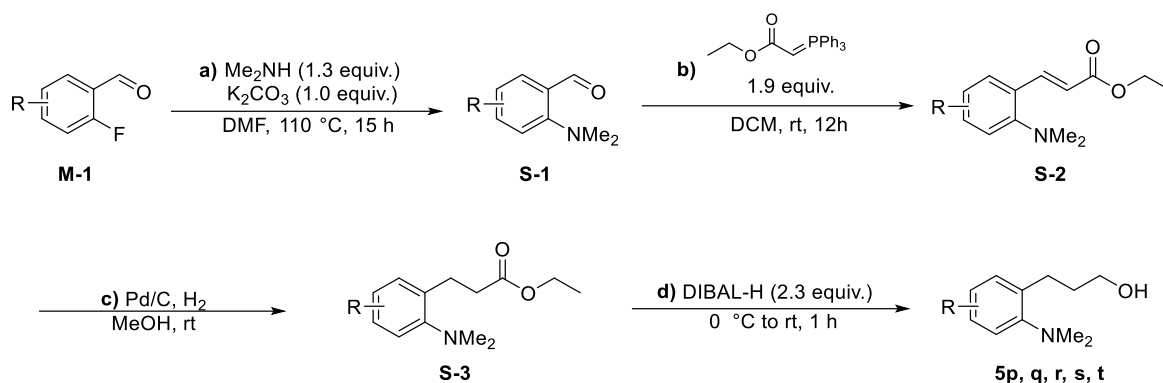

Figure S2. General synthetic method B

- a)** A solution of **M-1** (9 mmol) in anhydrous DMF (25 mL) was treated with  $\text{K}_2\text{CO}_3$  (9 mmol, 1.0 equiv.) and  $\text{Me}_2\text{NH}$  (12 mmol, 1.3 equiv.). After the solution was stirred at 110 °C for 24 hours. The organic phase was separated and the aqueous phase was extracted with ethyl acetate (3×10 mL). The combined organic layers were dried with anhydrous  $\text{Na}_2\text{SO}_4$ , filtered, and concentrated under reduced pressure. The crude product **S-1** was used in the following step without further purification.
- c)** Pd/C (10% on carbon, wetted with ca. 55% water) was added into the reaction flask, filled with nitrogen and purged with hydrogen three times. Methanol and **S-2** were added to the reaction flask. The mixture was stirred at 45 °C for 24 hours and filtered through a pad of silica gel. The filtrate was concentrated to give a crude product **S-3**, which was used in the following step without further purification.
- d)** To an ice cooled solution of **S-3** (5.0 mmol, 1.0 equiv.) in dichloromethane (10 mL) a solution of DIBAL-H (1.5 M in dichloromethane, 2.3 equiv.) was added slowly over 15 min. The reaction mixture was stirred at 0 °C for 30 min, and then at room temperature for 2 hours. After that, the reaction mixture was cooled to 0 °C (ice bath) again and the excess DBAL-H was quenched by sequential addition of water (2.0 mL), NaOH solution (1.5 mL, 10% aqueous) and water (2.0 mL). The ice bath was removed and the suspension was stirred for at room temperature for 1 hour. Afterwards, the suspension was filtered, dried over anhydrous  $\text{Na}_2\text{SO}_4$ , filtered and concentrated under reduced pressure to give an oil. Purification by column chromatography on silica gel ( $\text{SiO}_2$ , PE/EA = 5/1) to give the product **5p**.

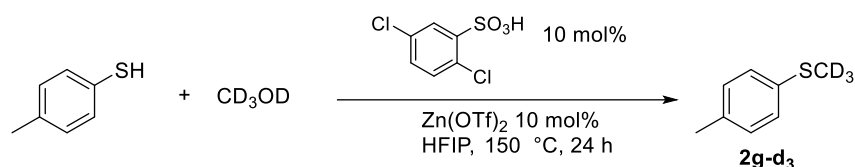

Figure S3. Synthesis of **2g-d<sub>3</sub>**

2,5-dichlorobenzenesulfonic acid (1mmol, 10 mol%), Zn(OTf)<sub>2</sub> (1mmol, 10 mol%) and HFIP (10 mL) were added into the reaction flask, to the solution 4-methylbenzenethiol (10 mmol, 1.0 equiv.) and CD<sub>3</sub>OD were added (30 mmol, 3.0 equiv.). The mixture was stirred at 120 °C for 24 hours and then cooled to room temperature. The organic phase was separated and the aqueous phase was extracted with ethyl acetate (3×10 mL). The combined organic layers were dried with anhydrous Na<sub>2</sub>SO<sub>4</sub>, filtered, and concentrated under reduced pressure. Purification by column chromatography on silica gel (PE) to give the product **2g-d<sub>3</sub>**. <sup>1</sup>H NMR (600 MHz, Chloroform-*d*) δ 7.19 (d, *J* = 7.8 Hz, 2H), 7.11 (d, *J* = 7.2 Hz, 2H), 2.32 (s, 3H).

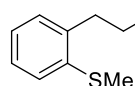

**5a: 3-(2-(methylthio)phenyl)propan-1-ol.** <sup>25</sup>

<sup>1</sup>H NMR (600 MHz, Chloroform-*d*) δ 7.23 – 7.19 (m, 2H), 7.17 (d, *J* = 7.5 Hz, 1H), 7.13 – 7.08 (m, 1H), 3.67 (t, *J* = 6.2 Hz, 2H), 2.82 (dd, *J* = 8.4, 6.8 Hz, 2H), 2.47 (d, *J* = 0.8 Hz, 3H), 1.97 – 1.83 (m, 2H).

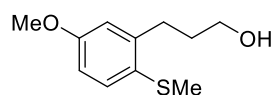

**5b: 3-(5-methoxy-2-(methylthio)phenyl)propan-1-ol.**

<sup>1</sup>H NMR (600 MHz, Chloroform-*d*) δ 7.25 (d, *J* = 8.4 Hz, 1H), 6.78 – 6.71 (m, 2H), 3.78 (s, 3H), 3.66 (t, *J* = 6.2 Hz, 2H), 2.88 – 2.78 (m, 2H), 2.40 (s, 3H), 1.91 – 1.85 (m, 2H).  
<sup>13</sup>C NMR (151 MHz, Chloroform-*d*) δ 158.34, 143.04, 130.53, 127.53, 115.26, 112.27, 61.88, 55.26, 33.44, 30.01, 18.07.

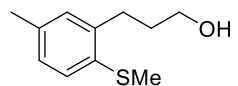

**5c: 3-(5-methyl-2-(methylthio)phenyl)propan-1-ol.**

<sup>1</sup>H NMR (600 MHz, Chloroform-*d*) δ 7.14 (d, *J* = 7.9 Hz, 1H), 7.01 (d, *J* = 13.2 Hz, 2H), 3.66 (t, *J* = 6.2 Hz, 2H), 2.80 (t, *J* = 7.6 Hz, 2H), 2.44 (s, 3H), 2.30 (s, 3H), 1.91 – 1.87 (m, 2H).  
<sup>13</sup>C NMR (151 MHz, Chloroform-*d*) δ 140.12, 135.19, 133.34, 130.10, 127.45, 126.67, 62.06, 33.23, 29.60, 20.82, 16.56.

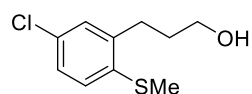

**5d: 3-(5-chloro-2-(methylthio)phenyl)propan-1-ol.**

<sup>1</sup>H NMR (600 MHz, Chloroform-*d*) δ 7.16 (d, *J* = 10.1 Hz, 2H), 7.11 (dd, *J* = 8.2, 1.8 Hz, 1H), 3.67 (td, *J* = 6.3, 1.9 Hz, 2H), 2.81 – 2.73 (m, 2H), 2.44 (s, 3H), 1.91 – 1.84 (m, 2H).

**<sup>13</sup>C NMR** (151 MHz, Chloroform-*d*)  $\delta$  141.45, 135.65, 130.79, 128.91, 126.97, 126.66, 61.83, 32.47, 29.49, 15.94.

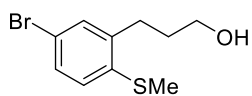

**5e: 3-(5-bromo-2-(methylthio)phenyl)propan-1-ol.**

**<sup>1</sup>H NMR** (600 MHz, Chloroform-*d*)  $\delta$  7.38 – 7.28 (m, 2H), 7.04 (d,  $J$  = 8.2 Hz, 1H), 3.67 (t,  $J$  = 6.2 Hz, 2H), 2.77 (dd,  $J$  = 8.5, 6.8 Hz, 2H), 2.44 (s, 3H), 1.91 – 1.84 (m, 2H).

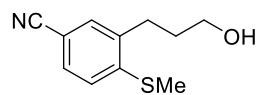

**5f: 3-(3-hydroxypropyl)-4-(methylthio)benzonitrile.**

**<sup>1</sup>H NMR** (600 MHz, Chloroform-*d*)  $\delta$  7.47 (d,  $J$  = 8.3 Hz, 1H), 7.40 (s, 1H), 7.18 (d,  $J$  = 8.3 Hz, 1H), 3.69 (t,  $J$  = 6.2 Hz, 2H), 2.79 (t,  $J$  = 7.9 Hz, 2H), 2.50 (s, 3H), 1.90 (t,  $J$  = 7.4 Hz, 2H).

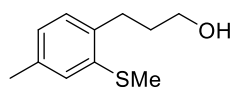

**5g: 3-(4-methyl-2-(methylthio)phenyl)propan-1-ol.**

**<sup>1</sup>H NMR** (600 MHz, Chloroform-*d*)  $\delta$  7.14 (d,  $J$  = 7.9 Hz, 1H), 7.01 (dd,  $J$  = 10.5, 2.7 Hz, 2H), 3.66 (t,  $J$  = 6.2 Hz, 2H), 2.85 – 2.76 (m, 2H), 2.44 (s, 3H), 2.30 (s, 3H), 1.92 – 1.85 (m, 2H). **<sup>13</sup>C NMR** (151 MHz, Chloroform-*d*)  $\delta$  140.12, 135.23, 133.36, 130.14, 127.57, 126.86, 62.06, 33.23, 29.60, 20.82, 16.56.

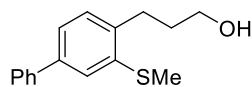

**5h: 3-(3-(methylthio)-[1,1'-biphenyl]-4-yl)propan-1-ol.**

**<sup>1</sup>H NMR** (600 MHz, Chloroform-*d*)  $\delta$  7.58 (d,  $J$  = 7.9 Hz, 2H), 7.45 (d,  $J$  = 7.5 Hz, 2H), 7.41 (d,  $J$  = 1.8 Hz, 1H), 7.37 – 7.30 (m, 2H), 7.24 (d,  $J$  = 7.8 Hz, 1H), 3.72 (t,  $J$  = 6.2 Hz, 2H), 2.86 (t,  $J$  = 7.6 Hz, 2H), 2.53 (s, 3H), 1.95 (t,  $J$  = 7.2 Hz, 2H). **<sup>13</sup>C NMR** (151 MHz, Chloroform-*d*)  $\delta$  140.83, 139.91, 138.72, 137.49, 129.52, 128.74, 127.28, 127.03, 124.46, 124.01, 62.11, 32.91, 29.30, 15.94.

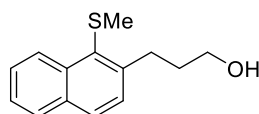

**5i: 3-(1-(methylthio)naphthalen-2-yl)propan-1-ol.**

**<sup>1</sup>H NMR** (600 MHz, Chloroform-*d*)  $\delta$  8.66 (d,  $J$  = 8.5 Hz, 1H), 7.83 (d,  $J$  = 8.1 Hz, 1H), 7.78 (d,  $J$  = 8.4 Hz, 1H), 7.60 (ddd,  $J$  = 8.4, 6.8, 1.3 Hz, 1H), 7.51 – 7.46 (m, 1H), 7.41 (d,  $J$  = 8.4 Hz, 1H), 3.69 (t,  $J$  = 6.1 Hz, 2H), 3.25 (t,  $J$  = 7.6 Hz, 2H), 2.34 (s, 3H), 2.01 – 1.94 (m, 2H). **<sup>13</sup>C NMR** (151 MHz, Chloroform-*d*)  $\delta$  144.58, 134.76, 132.98, 131.66, 129.24, 128.48, 127.89, 126.96, 126.34, 125.36, 61.81, 34.57, 31.54, 20.02.

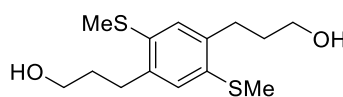

**5j: 3,3'-(2,5-bis(methylthio)-1,4-phenylene)bis(propan-1-ol).**

**<sup>1</sup>H NMR** (600 MHz, Chloroform-*d*)  $\delta$  7.03 (s, 2H), 3.67 (t,  $J$  = 6.2 Hz, 4H), 2.84 – 2.73 (m, 4H), 2.44 (s, 6H), 1.93 – 1.84 (m, 4H). **<sup>13</sup>C NMR** (151 MHz, Chloroform-*d*)  $\delta$



138.73, 133.95, 127.51, 62.06, 33.14, 29.46, 16.53.

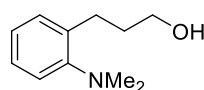

**5p: 3-(2-(dimethylamino)phenyl)propan-1-ol.**

<sup>1</sup>H NMR (600 MHz, Chloroform-*d*)  $\delta$  7.23 – 7.13 (m, 3H), 7.08 (td,  $J$  = 7.3, 1.5 Hz, 1H), 3.34 (t,  $J$  = 5.6 Hz, 2H), 2.86 – 2.78 (m, 2H), 2.71 (s, 6H), 1.83 – 1.73 (m, 2H).

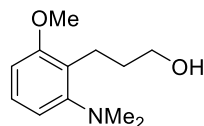

**5q: 3-(2-(dimethylamino)-6-methoxyphenyl)propan-1-ol.**

<sup>1</sup>H NMR (600 MHz, Chloroform-*d*)  $\delta$  7.17 (t,  $J$  = 8.1 Hz, 1H), 6.83 (d,  $J$  = 8.1 Hz, 1H), 6.70 (d,  $J$  = 8.2 Hz, 1H), 3.81 (s, 3H), 3.32 (d,  $J$  = 5.7 Hz, 2H), 2.87 (t,  $J$  = 6.5 Hz, 2H), 2.68 (d,  $J$  = 1.7 Hz, 6H), 1.77 (t,  $J$  = 6.2 Hz, 2H).

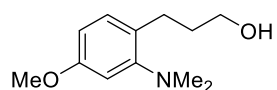

**5r: 3-(2-(dimethylamino)-4-methoxyphenyl)propan-1-ol.**

<sup>1</sup>H NMR (600 MHz, Chloroform-*d*)  $\delta$  7.08 (d,  $J$  = 8.4 Hz, 1H), 6.72 (s, 1H), 6.64 (d,  $J$  = 8.5 Hz, 1H), 3.79 (s, 3H), 3.34 (t,  $J$  = 5.7 Hz, 2H), 2.78 – 2.74 (m, 2H), 2.69 (d,  $J$  = 1.6 Hz, 6H), 1.76 (q,  $J$  = 6.3, 5.8 Hz, 2H).

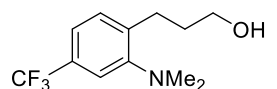

**5s: 3-(2-(dimethylamino)-4-(trifluoromethyl)phenyl)propan-1-ol.**

<sup>1</sup>H NMR (600 MHz, Chloroform-*d*)  $\delta$  7.36 (s, 1H), 7.35 – 7.26 (m, 2H), 3.38 (t,  $J$  = 5.7 Hz, 2H), 2.88 (dt,  $J$  = 9.1, 4.3 Hz, 2H), 2.73 (s, 6H), 1.83 (q,  $J$  = 6.4 Hz, 2H).

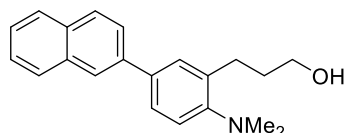

**5t: 3-(2-(dimethylamino)-5-(naphthalen-2-yl)phenyl)propan-1-ol.**

<sup>1</sup>H NMR (600 MHz, Chloroform-*d*)  $\delta$  8.01 (s, br, 1H), 7.90 (t,  $J$  = 7.9 Hz, 2H), 7.86 (d,  $J$  = 7.9 Hz, 1H), 7.73 (dd,  $J$  = 8.5, 1.8 Hz, 1H), 7.59 – 7.53 (m, 2H), 7.52 – 7.45 (m, 2H), 7.28 (d,  $J$  = 8.2 Hz, 1H), 3.42 (t,  $J$  = 5.6 Hz, 2H), 2.94 (t,  $J$  = 6.6 Hz, 2H), 2.78 (s, 6H), 1.92 – 1.86 (m, 2H). <sup>13</sup>C NMR (151 MHz, Chloroform-*d*)  $\delta$  151.74, 137.96, 137.51, 136.72, 133.65, 132.46, 129.67, 128.33, 128.06, 127.59, 126.23, 125.96, 125.77, 125.36, 125.31, 119.56, 59.43, 45.64, 33.83, 26.06.

#### 4 C–O/C–X $\sigma$ -bond metathesis of alcohols with thioethers

**General procedure A** for C–O/C–S(Se)  $\sigma$ -bond metathesis of alcohols with thioethers: to a 10 mL Schlenk tube was added AlCl<sub>3</sub> (50 mol%), ZnI<sub>2</sub> (100 mol%), alcohol (1.0 equiv.), thioether (5.0 equiv.) and cyclohexane (0.2 M). The reaction mixture was stirred at 120 °C for 24 hours, then the reaction was cooled to room temperature. The crude mixture was purified by flash column chromatography to afford the target product.

**General procedure B** for intramolecular ring-closing C–O/C–X  $\sigma$ -bond metathesis of alcohols

with thioethers, ethers and amines: to a 10 mL Schlenk tube was added AlCl<sub>3</sub> (50 mol%), substrate (1.0 equiv.) and cyclohexane (0.2 M). The reaction mixture was stirred at 120 °C for 24 hours, then the reaction was cooled to room temperature. The crude mixture was purified by flash column chromatography to afford the target product.

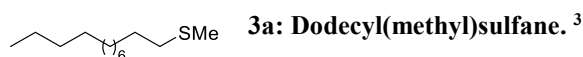

Following the general procedure A, AlCl<sub>3</sub> (0.1 mmol, 13.42 mg), ZnI<sub>2</sub> (0.2 mmol, 64.01 mg), **1a** (0.2 mmol, 45 uL), Me<sub>2</sub>S (1 mmol, 73 uL) and cyclohexane (1 mL). The reaction was stirred at 120 °C for 24 hours and purified through flash chromatography (100% petroleum ether) to give the desired product **3a** (17.89 mg, 81% yield) as a colorless oil. <sup>1</sup>H NMR (400 MHz, Chloroform-*d*) δ 2.48 (t, *J* = 7.4 Hz, 2H), 2.09 (s, 3H), 1.58 (q, *J* = 7.8 Hz, 3H), 1.26 (d, *J* = 6.6 Hz, 20H), 0.88 (t, *J* = 6.7 Hz, 3H).

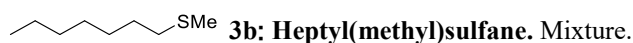

Following the general procedure A, AlCl<sub>3</sub> (0.1 mmol, 13.19 mg), ZnI<sub>2</sub> (0.2 mmol, 63.82 mg), **1b** (0.2 mmol, 28 uL), Me<sub>2</sub>S (1 mmol, 73 uL) and cyclohexane (1 mL). The reaction was stirred at 120 °C for 24 hours and purified through flash chromatography (100% petroleum ether) to give the desired product **3b** (19.87 mg, 68% yield) as a colorless oil. <sup>1</sup>H NMR (600 MHz, Chloroform-*d*) δ 2.49 (d, *J* = 7.5 Hz, 2.58H), 2.09 (s, 3H), 1.58 (d, *J* = 6.2 Hz, 3.34H), 1.42 – 1.22 (m, 11.28H), 0.88 (t, *J* = 6.7 Hz, 3.98H).

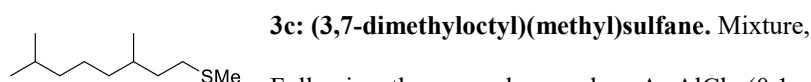

Following the general procedure A, AlCl<sub>3</sub> (0.1 mmol, 13.36 mg), ZnI<sub>2</sub> (0.2 mmol, 63.87 mg), **1c** (0.2 mmol, 31.86 mg), Me<sub>2</sub>S (1 mmol, 73 uL) and cyclohexane (1 mL). The reaction was stirred at 120 °C for 24 hours and purified through flash chromatography (100% petroleum ether) to give the desired product **3c** (29.36 mg, 78% yield) as a colorless oil. <sup>1</sup>H NMR (600 MHz, Chloroform-*d*) δ 2.58 – 2.43 (m, 2.67H), 2.10 (s, 3H), 1.68 – 1.46 (m, 5.68H), 1.45 – 1.35 (m, 1.76H), 1.12 (dd, *J* = 18.5, 9.8 Hz, 4.75H), 0.87 (t, *J* = 8.1 Hz, 13.50H).

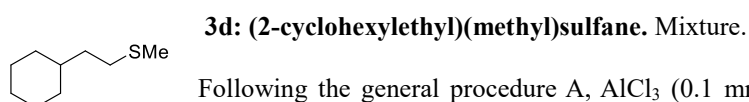

Following the general procedure A, AlCl<sub>3</sub> (0.1 mmol, 13.57 mg), ZnI<sub>2</sub> (0.2 mmol, 63.75 mg), **1d** (0.2 mmol, 24.03 mg), Me<sub>2</sub>S (1 mmol, 73 uL) and cyclohexane (1 mL). The reaction was stirred at 120 °C for 24 hours and purified through flash chromatography (100% petroleum ether) to give the desired product **3d** (24.05 mg, 76% yield) as a colorless oil. <sup>1</sup>H NMR (600 MHz, Chloroform-*d*) δ

2.54 – 2.47 (m, 2.38H), 2.09 (s, 3H), 1.76 – 1.61 (m, 6.22H), 1.51 – 1.45 (m, 2.38H), 1.34 (tdq,  $J = 14.0$ , 6.8, 3.4 Hz, 1.11H), 1.27 – 1.08 (m, 4.05H), 0.94 – 0.84 (m, 2.55H).

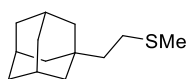

**3e: (2-((3r,5r,7r)-adamantan-1-yl)ethyl)(methyl)sulfane.** Mixture

Following the general procedure A,  $\text{AlCl}_3$  (0.1 mmol, 13.40 mg),  $\text{ZnI}_2$  (0.2 mmol, 63.56 mg), **1e** (0.2 mmol, 36.28 mg),  $\text{Me}_2\text{S}$  (1 mmol, 73  $\mu\text{L}$ ) and cyclohexane (1 mL). The reaction was stirred at 120 °C for 24 hours and purified through flash chromatography (100% petroleum ether) to give the desired product **3e** (22.68 mg, 54% yield) as a colorless oil.  $^1\text{H NMR}$  (600 MHz, Chloroform- $d$ )  $\delta$  2.49 – 2.41 (m, 2.47H), 2.09 (s, 3H), 1.95 (s, 3.80H), 1.70 (dt,  $J = 12.3$ , 3.1 Hz, 4H), 1.62 (dq,  $J = 12.4$ , 2.1 Hz, 4H), 1.48 (d,  $J = 3.0$  Hz, 7.63H), 1.39 – 1.33 (m, 2.47H).

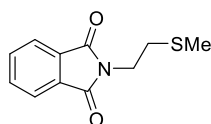

**3f: 2-(2-(methylthio)ethyl)isoindoline-1,3-dione.**

Following the general procedure A,  $\text{AlCl}_3$  (0.1 mmol, 13.48 mg),  $\text{ZnI}_2$  (0.2 mmol, 63.76 mg), **1f** (0.2 mmol, 39.43 mg),  $\text{Me}_2\text{S}$  (1 mmol, 73  $\mu\text{L}$ ) and cyclohexane (1 mL). The reaction was stirred at 120 °C for 24 hours and purified through flash chromatography (100% petroleum ether) to give the desired product **3f** (22.05 mg, 50% yield) as white solid.  $^1\text{H NMR}$  (600 MHz, Chloroform- $d$ )  $\delta$  7.88 – 7.82 (m, 2H), 7.74 – 7.67 (m, 2H), 3.91 (t,  $J = 7.0$  Hz, 2H), 2.81 (t,  $J = 7.0$  Hz, 2H), 2.17 (s, 3H).  $^{13}\text{C NMR}$  (151 MHz, Chloroform- $d$ )  $\delta$  168.16, 133.97, 132.01, 123.30, 36.39, 32.17, 15.10. **HRMS (APCI)**  $m/z$ :  $M$  calcd for  $\text{C}_{11}\text{H}_{11}\text{NO}_2\text{S}$ : 221.0510, found 221.0506.

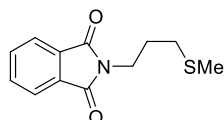

**3g: 2-(3-(methylthio)propyl)isoindoline-1,3-dione.**

Following the general procedure A,  $\text{AlCl}_3$  (0.1 mmol, 13.48 mg),  $\text{ZnI}_2$  (0.2 mmol, 63.76 mg), **1g** (0.2 mmol, 39.43 mg),  $\text{Me}_2\text{S}$  (1 mmol, 73  $\mu\text{L}$ ) and cyclohexane (1 mL). The reaction was stirred at 120 °C for 24 hours and purified through flash chromatography (100% petroleum ether) to give the desired product **3g** (69.11 mg, 59% yield) as white solid.  $^1\text{H NMR}$  (600 MHz, Chloroform- $d$ )  $\delta$  7.85 (dt,  $J = 5.3$ , 2.3 Hz, 2H), 7.73 (dt,  $J = 5.2$ , 2.3 Hz, 2H), 3.80 (t,  $J = 7.3$  Hz, 2H), 2.55 (t,  $J = 7.4$  Hz, 2H), 2.11 (s, 3H), 1.99 (p,  $J = 7.4$  Hz, 2H).  $^{13}\text{C NMR}$  (101 MHz, Chloroform- $d$ )  $\delta$  168.31, 133.93, 132.12, 123.21, 37.08, 31.41, 27.90, 15.37. **HRMS (APCI)**  $m/z$ :  $M$  calcd for  $\text{C}_{11}\text{H}_{13}\text{NO}_2\text{S}$ : 235.0667, found 235.0669.

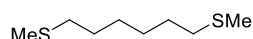

**3h: 1,6-bis(methylthio)hexane.**

Following the general procedure A,  $\text{AlCl}_3$  (0.1 mmol, 13.65 mg),  $\text{ZnI}_2$  (0.2 mmol, 63.74 mg), **1h** (0.2 mmol, 29.62 mg),  $\text{Me}_2\text{S}$  (1 mmol, 73  $\mu\text{L}$ ) and cyclohexane (1 mL). The reaction was stirred at 120 °C

for 24 hours and purified through flash chromatography (100% petroleum ether) to give the desired product **3h** (10.67 mg, 43% yield) as a colorless oil. **<sup>1</sup>H NMR** (600 MHz, Chloroform-*d*)  $\delta$  2.49 (t, *J* = 7.5 Hz, 4H), 2.10 (s, 6H), 1.60 (t, *J* = 7.0 Hz, 4H), 1.45 – 1.40 (m, 4H). **<sup>13</sup>C NMR** (151 MHz, Chloroform-*d*)  $\delta$  34.20, 29.03, 28.39, 15.53.

**3i: cyclohexyl(methyl)sulfane.**<sup>5</sup>

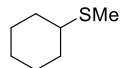

Following the general procedure A, AlCl<sub>3</sub> (0.25 mmol, 33.36 mg), ZnI<sub>2</sub> (0.5 mmol, 159.67 mg), **1i** (0.5 mmol, 53 uL), Me<sub>2</sub>S (1 mmol, 184 uL) and cyclohexane (2 mL). The reaction was stirred at 120 °C for 24 hours and purified through flash chromatography (100% petroleum ether) to give the desired product **3i** (70% <sup>1</sup>H yield, the product is readily volatile.) as a colorless oil. **<sup>1</sup>H NMR** (400 MHz, Chloroform-*d*)  $\delta$  2.53 (d, *J* = 4.1 Hz, 1H), 2.08 (s, 3H), 2.02 – 1.91 (m, 2H), 1.76 (q, *J* = 6.6, 5.2 Hz, 2H), 1.37 – 1.17 (m, 6H).

**3j: Ethyl(heptyl)sulfane.**

Following the general procedure A, AlCl<sub>3</sub> (0.1 mmol, 13.46 mg), ZnI<sub>2</sub> (0.2 mmol, 63.88 mg), **1b** (0.2 mmol, 28 uL), Et<sub>2</sub>S (1 mmol, 108 uL) and cyclohexane (1 mL). The reaction was stirred at 120 °C for 24 hours and purified through flash chromatography (100% petroleum ether) to give the desired product **3j** (21.23 mg, 66% yield) as a colorless oil. **<sup>1</sup>H NMR** (400 MHz, Chloroform-*d*)  $\delta$  2.57 – 2.48 (m, 4H), 1.58 (dd, *J* = 15.1, 7.2 Hz, 3H), 1.41 – 1.25 (m, 10H), 0.89 – 0.85 (m, 3H). **<sup>13</sup>C NMR** (151 MHz, Chloroform-*d*)  $\delta$  34.21, 32.11, 31.73, 29.75, 28.91, 23.01, 22.59, 14.04, 13.51.

**3k: Heptyl(propyl)sulfane.**

Following the general procedure A, AlCl<sub>3</sub> (0.1 mmol, 13.228 mg), ZnI<sub>2</sub> (0.2 mmol, 63.94 mg), **1b** (0.2 mmol, 28 uL), Pr<sub>2</sub>S (1 mmol, 141 uL) and cyclohexane (1 mL). The reaction was stirred at 120 °C for 24 hours and purified through flash chromatography (100% petroleum ether) to give the desired product **3k** (21.98 mg, 663% yield) as a colorless oil. **<sup>1</sup>H NMR** (400 MHz, Chloroform-*d*)  $\delta$  2.49 (td, *J* = 7.4, 4.6 Hz, 4H), 1.63 – 1.55 (m, 4H), 1.41 – 1.26 (m, 8H), 0.98 (t, *J* = 7.3 Hz, 3H), 0.87 (d, *J* = 7.0 Hz, 3H). **<sup>13</sup>C NMR** (151 MHz, Chloroform-*d*)  $\delta$  32.18, 31.73, 31.67, 29.74, 29.67, 28.92, 25.91, 22.60, 14.81, 14.06.

**3l: Benzyl(methyl)sulfane.**<sup>6</sup>

Following the general procedure A, AlCl<sub>3</sub> (0.1 mmol, 13.41 mg), ZnI<sub>2</sub> (0.2 mmol, 63.98 mg), **1l** (0.2 mmol, 22.68 mg), Me<sub>2</sub>S (1 mmol, 73 uL) and cyclohexane (1 mL). The reaction was stirred at 120 °C for 24 hours and purified through flash chromatography (100% petroleum ether) to give the

desired product **3l** (15.14 mg, 52% yield, the product is readily volatile) as a colorless oil. <sup>1</sup>H NMR (600 MHz, Chloroform-*d*) δ 7.36 – 7.28 (m, 5H), 3.71 (s, 2H), 2.03 (s, 3H).

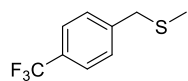

**3m: Methyl(4-(trifluoromethyl)benzyl)sulfane.** <sup>7</sup>

Following the general procedure A, AlCl<sub>3</sub> (0.1 mmol, 13.99 mg), ZnI<sub>2</sub> (0.2 mmol, 64.13 mg), **1m** (0.2 mmol, 36.23 mg), Me<sub>2</sub>S (1 mmol, 73 uL) and cyclohexane (1 mL). The reaction was stirred at 120 °C for 24 hours and purified through flash chromatography (100% petroleum ether) to give the desired product **3m** (25.96 mg, 61% yield, the product is readily volatile) as a colorless oil. <sup>1</sup>H NMR (600 MHz, Chloroform-*d*) δ 7.58 (d, *J* = 8.0 Hz, 2H), 7.42 (d, *J* = 8.0 Hz, 2H), 3.71 (s, 2H), 2.00 (s, 3H).

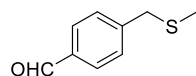

**3n: 4-((methylthio)methyl)benzaldehyde.** <sup>8</sup>

Following the general procedure A, AlCl<sub>3</sub> (0.1 mmol, 13.46 mg), ZnI<sub>2</sub> (0.2 mmol, 64.56 mg), **1n** (0.2 mmol, 29.59 mg), Me<sub>2</sub>S (1 mmol, 73 uL) and cyclohexane (1 mL). The reaction was stirred at 120 °C for 24 hours and purified through flash chromatography (100% petroleum ether) to give the desired product **3n** (17.21 mg, 55% yield, the product is readily volatile) as a colorless oil. <sup>1</sup>H NMR (600 MHz, Chloroform-*d*) δ 9.99 (s, 1H), 7.84 (d, *J* = 8.1 Hz, 2H), 7.47 (d, *J* = 7.9 Hz, 2H), 3.72 (s, 2H), 1.99 (s, 3H).

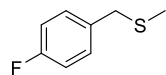

**3o: (4-fluorobenzyl)(methyl)sulfane.** <sup>9</sup>

Following the general procedure A, AlCl<sub>3</sub> (0.1 mmol, 13.35 mg), ZnI<sub>2</sub> (0.2 mmol, 63.77 mg), **1o** (0.2 mmol, 26.48 mg), Me<sub>2</sub>S (1 mmol, 73 uL) and cyclohexane (1 mL). The reaction was stirred at 120 °C for 24 hours and purified through flash chromatography (100% petroleum ether) to give the desired product **3o** (81% <sup>1</sup>H yield, the product is readily volatile) as a colorless oil. <sup>1</sup>H NMR (600 MHz, Chloroform-*d*) δ 7.26 (d, *J* = 4.1 Hz, 2H), 7.00 (td, *J* = 8.7, 3.0 Hz, 2H), 3.64 (s, 2H), 1.98 (s, 3H).

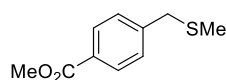

**3p: methyl 4-((methylthio)methyl)benzoate.** <sup>10</sup>

Following the general procedure A, AlCl<sub>3</sub> (0.1 mmol, 13.35 mg), ZnI<sub>2</sub> (0.2 mmol, 63.77 mg), **1p** (0.2 mmol, 33.63 mg), Me<sub>2</sub>S (1 mmol, 73 uL) and cyclohexane (1 mL). The reaction was stirred at 120 °C for 24 hours and purified through flash chromatography (100% petroleum ether) to give the desired product **3p** (81% <sup>1</sup>H yield, the product is readily volatile) as a colorless oil. colorless oil (18.02 mg, 46% yield). <sup>1</sup>H NMR (400 MHz, Chloroform-*d*) δ 7.99 (d, *J* = 8.3 Hz, 2H), 7.37 (d, *J* = 8.2 Hz, 2H), 3.91 (s, 3H), 3.70 (s, 2H), 1.98 (s, 3H).

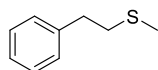

**3q: Methyl(phenethyl)sulfane.** <sup>5</sup>

Following the general procedure A,  $\text{AlCl}_3$  (0.25 mmol, 33.00 mg),  $\text{ZnI}_2$  (0.55 mmol, 161.04 mg), **1q** (0.5 mmol, 62.07 mg),  $\text{Me}_2\text{S}$  (1 mmol, 184  $\mu\text{L}$ ) and cyclohexane (2 mL). The reaction was stirred at 120 °C for 24 hours and purified through flash chromatography (100% petroleum ether) to give the desired product **3q** (54.12 mg, 70% yield, the product is readily volatile) as a colorless oil.  **$^1\text{H}$  NMR** (600 MHz, Chloroform-*d*)  $\delta$  7.31 (m, 2H), 7.26 – 7.19 (m, 3H), 2.93 – 2.88 (m, 2H), 2.82 – 2.71 (m, 2H), 2.13 (s, 3H).

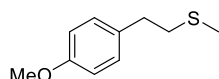

**3r: (4-methoxyphenethyl)(methyl)sulfane.**

Following the general procedure A,  $\text{AlCl}_3$  (0.1 mmol, 13.36 mg),  $\text{ZnI}_2$  (0.2 mmol, 63.84 mg), **1r** (0.2 mmol, 32.19 mg),  $\text{Me}_2\text{S}$  (1 mmol, 73  $\mu\text{L}$ ) and cyclohexane (1 mL). The reaction was stirred at 120 °C for 24 hours and purified through flash chromatography (100% petroleum ether) to give the desired product **3r** (16.95 mg, 44% yield) as a colorless oil.  **$^1\text{H}$  NMR** (600 MHz, Chloroform-*d*)  $\delta$  7.13 (d,  $J$  = 8.6 Hz, 2H), 6.85 (d,  $J$  = 8.6 Hz, 2H), 3.79 (s, 3H), 2.87 – 2.82 (m, 2H), 2.76 – 2.69 (m, 2H), 2.12 (s, 3H).  **$^{13}\text{C}$  NMR** (151 MHz, Chloroform-*d*)  $\delta$  158.09, 132.64, 129.40, 113.83, 55.22, 36.08, 34.95, 15.67. **HRMS (APCI)**  $m/z$ :  $M$  calcd for  $\text{C}_{10}\text{H}_{14}\text{OS}$ : 182.0765, found 182.0761.

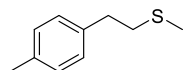

**3s: Methyl(4-methylphenethyl)sulfane.** <sup>11</sup>

Following the general procedure A,  $\text{AlCl}_3$  (0.1 mmol, 13.46 mg),  $\text{ZnI}_2$  (0.2 mmol, 64.57 mg), **1s** (0.2 mmol, 26.43 mg),  $\text{Me}_2\text{S}$  (1 mmol, 73  $\mu\text{L}$ ) and cyclohexane (1 mL). The reaction was stirred at 120 °C for 24 hours and purified through flash chromatography (100% petroleum ether) to give the desired product **3s** (18.22 mg, 54% yield) as a colorless oil.  **$^1\text{H}$  NMR** (600 MHz, Chloroform-*d*)  $\delta$  7.11 (m, 4H), 2.90 – 2.84 (m, 2H), 2.75 (d,  $J$  = 7.9 Hz, 2H), 2.33 (s, 3H), 2.13 (s, 3H).

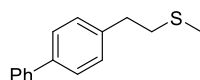

**3t: (2-([1,1'-biphenyl]-4-yl)ethyl)(methyl)sulfane.**

Following the general procedure A,  $\text{AlCl}_3$  (0.1 mmol, 13.62 mg),  $\text{ZnI}_2$  (0.2 mmol, 64.82 mg), **1t** (0.2 mmol, 42.36 mg),  $\text{Me}_2\text{S}$  (1 mmol, 73  $\mu\text{L}$ ) and cyclohexane (1 mL). The reaction was stirred at 120 °C for 24 hours and purified through flash chromatography (100% petroleum ether) to give the desired product **3t** (28.34, 61% yield) as a colorless oil.  **$^1\text{H}$  NMR** (600 MHz, Chloroform-*d*)  $\delta$  7.59 (d,  $J$  = 6.8 Hz, 2H), 7.54 (d,  $J$  = 6.0 Hz, 2H), 7.44 (t,  $J$  = 6.7 Hz, 2H), 7.34 (t,  $J$  = 7.5 Hz, 1H), 7.30 (d,  $J$  = 6.1 Hz, 2H), 2.95 (t,  $J$  = 7.5 Hz, 2H), 2.85 – 2.75 (m, 2H), 2.16 (s, 3H).  **$^{13}\text{C}$  NMR** (151 MHz, Chloroform-*d*)  $\delta$  140.91, 139.61, 139.27, 128.89, 128.70, 127.17, 127.09, 126.98, 35.75, 35.46, 15.72.

**HRMS (APCI) m/z:** M calcd for C<sub>15</sub>H<sub>16</sub>S: 228.0973, found 228.0968.

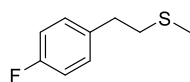

**3u: (4-fluorophenethyl)(methyl)sulfane.** <sup>11</sup>

Following the general procedure A, AlCl<sub>3</sub> (0.25 mmol, 33.76 mg), ZnI<sub>2</sub> (0.5mmol, 160.40 mg), **1s** (0.5 mmol, 71.84 mg), Me<sub>2</sub>S (1 mmol, 184 uL) and cyclohexane (1 mL). The reaction was stirred at 120 °C for 24 hours and purified through flash chromatography (100% petroleum ether) to give the desired product **3s** (62.20 mg, 71% yield) as a colorless oil. **<sup>1</sup>H NMR** (600 MHz, Chloroform-*d*) δ 7.17 (dd, *J* = 8.5, 5.5 Hz, 2H), 6.98 (t, *J* = 8.7 Hz, 2H), 2.89 – 2.85 (m, 2H), 2.75 – 2.71 (m, 2H), 2.12 (s, 3H).

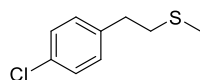

**3v: (4-chlorophenethyl)(methyl)sulfane.** <sup>5</sup>

Following the general procedure A, AlCl<sub>3</sub> (0.25 mmol, 33.69 mg), ZnI<sub>2</sub> (0.5mmol, 162.20 mg), **1v** (0.5 mmol, 78.65 mg), Me<sub>2</sub>S (1 mmol, 184 uL) and cyclohexane (1 mL). The reaction was stirred at 120 °C for 24 hours and purified through flash chromatography (100% petroleum ether) to give the desired product **3v** (69.31 mg, 74% yield) as a colorless oil. **<sup>1</sup>H NMR** (600 MHz, Chloroform-*d*) δ 7.26 (d, *J* = 8.3 Hz, 2H), 7.14 (d, *J* = 8.3 Hz, 2H), 2.90 – 2.83 (m, 2H), 2.76 – 2.70 (m, 2H), 2.11 (s, 3H).

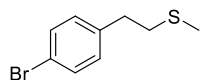

**3w: (4-bromophenethyl)(methyl)sulfane.** <sup>11</sup>

Following the general procedure A, AlCl<sub>3</sub> (0.1 mmol, 13.32 mg), ZnI<sub>2</sub> (0.2mmol, 64.62 mg), **1w** (0.2 mmol, 40.17 mg), Me<sub>2</sub>S (1 mmol, 73 uL) and cyclohexane (1 mL). The reaction was stirred at 120 °C for 24 hours and purified through flash chromatography (100% petroleum ether) to give the desired product **3w** (36.63, 75% yield) as a colorless oil. **<sup>1</sup>H NMR** (600 MHz, Chloroform-*d*) δ 7.42 (d, *J* = 8.3 Hz, 2H), 7.09 (d, *J* = 8.3 Hz, 2H), 2.87 – 2.83 (m, 2H), 2.73 (t, *J* = 7.6 Hz, 2H), 2.11 (s, 3H).

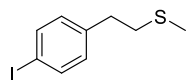

**3x: (4-iodophenethyl)(methyl)sulfane.**

Following the general procedure A, AlCl<sub>3</sub> (0.25 mmol, 33.17 mg), ZnI<sub>2</sub> (0.5mmol, 159.40 mg), **1x** (0.5 mmol, 124.21 mg), Me<sub>2</sub>S (1 mmol, 184 uL) and cyclohexane (1 mL). The reaction was stirred at 120 °C for 24 hours and purified through flash chromatography (100% petroleum ether) to give the desired product **3x** (93.12 mg, 67% yield) as a white solid. **<sup>1</sup>H NMR** (600 MHz, Chloroform-*d*) δ 7.61 (d, *J* = 8.3 Hz, 2H), 6.96 (d, *J* = 8.2 Hz, 2H), 2.86 – 2.80 (m, 2H), 2.72 (t, *J* = 7.9 Hz, 2H), 2.11 (s, 3H). **<sup>13</sup>C NMR** (151 MHz, Chloroform-*d*) δ 140.06, 137.43, 130.56, 91.47, 35.50, 35.22, 15.70.

**HRMS (APCI) m/z:** M calcd for C<sub>9</sub>H<sub>11</sub>IS: 277.9626, found 277.9622.

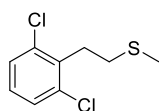

**3y: (2,6-dichlorophenethyl)(methyl)sulfane.**<sup>12</sup>

Following the general procedure A, AlCl<sub>3</sub> (0.1 mmol, 13.19 mg), ZnI<sub>2</sub> (0.2mmol, 64.51 mg), **1y** (0.2 mmol, 38.87 mg), Me<sub>2</sub>S (1 mmol, 73 uL) and cyclohexane (1 mL). The reaction was stirred at 120 °C for 24 hours and purified through flash chromatography (100% petroleum ether) to give the desired product **3y** (13.65 mg, 31% yield) as a colorless oil. <sup>1</sup>H NMR (600 MHz, Chloroform-*d*) δ 7.32 – 7.23 (m, 2H), 7.18 – 7.06 (m, 2H), 2.90 – 2.83 (m, 2H), 2.76 – 2.70 (m, 2H), 2.11 (s, 3H).

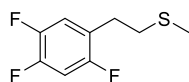

**3z: Methyl(2,4,6-trifluorophenethyl)sulfane.**

Following the general procedure A, AlCl<sub>3</sub> (0.1 mmol, 13.39 mg), ZnI<sub>2</sub> (0.2mmol, 63.68 mg), **1z** (0.2 mmol, 37.02 mg), Me<sub>2</sub>S (1 mmol, 73 uL) and cyclohexane (1 mL). The reaction was stirred at 120 °C for 24 hours and purified through flash chromatography (100% petroleum ether) to give the desired product **3z** (17.29 mg, 42% yield) as a colorless oil. <sup>1</sup>H NMR (600 MHz, Chloroform-*d*) δ 7.03 (dd, *J* = 17.3, 8.7 Hz, 1H), 6.94 – 6.81 (m, 1H), 2.91 – 2.84 (m, 2H), 2.76 – 2.66 (m, 2H), 2.13 (s, 3H). <sup>13</sup>C NMR (151 MHz, Chloroform-*d*) δ 123.62, 123.50, 118.32, 118.28, 118.20, 118.16, 105.51, 105.38, 105.32, 105.19, 34.05, 28.47, 15.54. <sup>19</sup>F NMR (565 MHz, Chloroform-*d*) δ -120.21, -136.22 – -136.38 (m), -143.21.

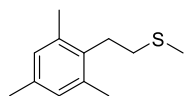

**3aa: Methyl(2,4,6-trimethylphenethyl)sulfane.**

Following the general procedure A, AlCl<sub>3</sub> (0.1 mmol, 13.33 mg), ZnI<sub>2</sub> (0.2mmol, 63.87 mg), **1aa** (0.2 mmol, 38.87 mg), Me<sub>2</sub>S (1 mmol, 73 uL) and cyclohexane (1 mL). The reaction was stirred at 120 °C for 24 hours and purified through flash chromatography (100% petroleum ether) to give the desired product **3aa** (29.13 mg, 75% yield) as a colorless oil. <sup>1</sup>H NMR (600 MHz, Chloroform-*d*) δ 6.87 (s, 2H), 2.95 – 2.89 (m, 2H), 2.64 – 2.57 (m, 2H), 2.34 (s, 6H), 2.28 (s, 3H), 2.23 (s, 3H). <sup>13</sup>C NMR (151 MHz, Chloroform-*d*) δ 135.97, 135.58, 134.11, 128.98, 32.95, 29.60, 20.76, 19.67, 15.57. HRMS (APCI) *m/z*: M calcd for C<sub>12</sub>H<sub>18</sub>S: 194.1129, found 194.1124.

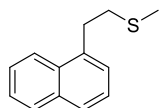

**3bb: Methyl(2-(naphthalen-1-yl)ethyl)sulfane.**

Following the general procedure A, AlCl<sub>3</sub> (0.1 mmol, 13.37 mg), ZnI<sub>2</sub> (0.2mmol, 63.92 mg), **1bb** (0.2 mmol, 33.79 mg), Me<sub>2</sub>S (1 mmol, 73 uL) and cyclohexane (1 mL). The reaction was stirred at 120 °C for 24 hours and purified through flash chromatography (100% petroleum ether) to give the desired product **3bb** (24.67 mg, 61% yield) as a colorless oil. <sup>1</sup>H NMR (600 MHz, Chloroform-*d*) δ 8.03 (d, *J* = 8.4 Hz, 1H), 7.87 (d, *J* = 8.1 Hz, 1H), 7.75 (d, *J* = 8.1 Hz, 1H), 7.57 – 7.51 (m, 1H), 7.52 – 7.46



(m, 1H), 7.45 – 7.40 (m, 1H), 7.38 (d,  $J$  = 6.9 Hz, 1H), 3.41 – 3.33 (m, 2H), 2.90 (t,  $J$  = 8.1 Hz, 2H), 2.20 (s, 3H).  $^{13}\text{C}$  NMR (151 MHz, Chloroform- $d$ )  $\delta$  136.54, 133.87, 131.60, 128.85, 127.13, 126.33, 125.99, 125.53, 125.50, 123.38, 35.05, 33.23, 15.77. HRMS (APCI)  $m/z$ :  $M$  calcd for  $\text{C}_{13}\text{H}_{14}\text{S}$ : 202.0816, found 202.0811.

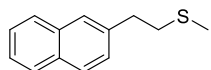

**3cc: Methyl(2-(naphthalen-2-yl)ethyl)sulfane.** <sup>11</sup>

Following the general procedure A,  $\text{AlCl}_3$  (0.1 mmol, 13.65 mg),  $\text{ZnI}_2$  (0.2mmol, 64.36 mg), **1cc** (0.2 mmol, 34.49 mg),  $\text{Me}_2\text{S}$  (1 mmol, 73  $\mu\text{L}$ ) and cyclohexane (1 mL). The reaction was stirred at 120  $^\circ\text{C}$  for 24 hours and purified through flash chromatography (100% petroleum ether) to give the desired product **3cc** (18.18 mg, 45% yield) as a colorless oil.  $^1\text{H}$  NMR (600 MHz, Chloroform- $d$ )  $\delta$  7.80 (t,  $J$  = 9.7 Hz, 3H), 7.66 (s, 1H), 7.45 (p,  $J$  = 6.9 Hz, 2H), 7.35 (d,  $J$  = 8.5 Hz, 1H), 3.07 (t,  $J$  = 7.7 Hz, 2H), 2.88 – 2.82 (m, 2H), 2.16 (s, 3H).

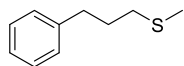

**3dd: Methyl(3-phenylpropyl)sulfanemethyl(3-phenylpropyl)sulfane.** <sup>5</sup>

Following the general procedure A,  $\text{AlCl}_3$  (0.1 mmol, 13.44 mg),  $\text{ZnI}_2$  (0.2mmol, 63.81 mg), **1dd** (0.2 mmol, 27.24 mg),  $\text{Me}_2\text{S}$  (1 mmol, 73  $\mu\text{L}$ ) and cyclohexane (1 mL). The reaction was stirred at 120  $^\circ\text{C}$  for 24 hours and purified through flash chromatography (100% petroleum ether) to give the desired product **3dd** (19.27 mg, 58% yield) as a colorless oil.  $^1\text{H}$  NMR (600 MHz, Chloroform- $d$ )  $\delta$  7.29 (t,  $J$  = 7.6 Hz, 2H), 7.26 – 7.12 (m, 3H), 2.73 (t,  $J$  = 7.6 Hz, 2H), 2.52 (t,  $J$  = 7.3 Hz, 2H), 2.10 (s, 3H), 2.00 – 1.88 (m, 2H).

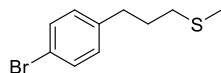

**3ee: (3-(4-bromophenyl)propyl)(methyl)sulfane.**

Following the general procedure A,  $\text{AlCl}_3$  (0.1 mmol, 13.55 mg),  $\text{ZnI}_2$  (0.2mmol, 63.67 mg), **1ee** (0.2 mmol, 44.15 mg),  $\text{Me}_2\text{S}$  (1 mmol, 73  $\mu\text{L}$ ) and cyclohexane (1 mL). The reaction was stirred at 120  $^\circ\text{C}$  for 24 hours and purified through flash chromatography (100% petroleum ether) to give the desired product **3ee** (33.31 mg, 68% yield) as a colorless oil.  $^1\text{H}$  NMR (600 MHz, Chloroform- $d$ )  $\delta$  7.40 (d,  $J$  = 8.4 Hz, 2H), 7.06 (d,  $J$  = 8.3 Hz, 2H), 2.72 – 2.63 (m, 2H), 2.49 (t,  $J$  = 7.2 Hz, 2H), 2.09 (s, 3H), 1.89 (t,  $J$  = 7.4 Hz, 2H).  $^{13}\text{C}$  NMR (151 MHz, Chloroform- $d$ )  $\delta$  140.49, 131.38, 130.20, 119.60, 34.01, 33.39, 30.37, 15.42. HRMS (APCI)  $m/z$ :  $M$  calcd for  $\text{C}_{10}\text{H}_{13}\text{BrS}$ : 243.9921, found 243.9918.

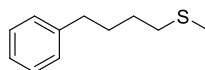

**3ff: Methyl(4-phenylbutyl)sulfane.** <sup>4</sup>

Following the general procedure A,  $\text{AlCl}_3$  (0.25 mmol, 33.13 mg),  $\text{ZnI}_2$  (0.5mmol, 160.71 mg), **1ff** (0.5 mmol, 73.46 mg),  $\text{Me}_2\text{S}$  (1 mmol, 184  $\mu\text{L}$ ) and cyclohexane (2 mL). The reaction

was stirred at 120 °C for 24 hours and purified through flash chromatography (100% petroleum ether) to give the desired product **3ff** (63.03 mg, 70% yield) as colorless oil. **<sup>1</sup>H NMR** (600 MHz, Chloroform-*d*)  $\delta$  7.29 (t, *J* = 7.6 Hz, 2H), 7.26 – 7.15 (m, 3H), 2.65 (t, *J* = 7.6 Hz, 2H), 2.53 (t, *J* = 7.3 Hz, 2H), 2.09 (s, 3H), 1.78 – 1.72 (m, 2H), 1.69 – 1.62 (m, 2H).

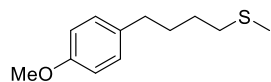

**3gg: (4-(4-methoxyphenyl)butyl)(methyl)sulfane.**

Following the general procedure A, AlCl<sub>3</sub> (0.25 mmol, 33.35 mg), ZnI<sub>2</sub> (0.5mmol, 160.65 mg), **1gg** (0.5 mmol, 90.12 mg), Me<sub>2</sub>S (1 mmol, 184  $\mu$ L) and cyclohexane (2 mL). The reaction was stirred at 120 °C for 24 hours and purified through flash chromatography (100% petroleum ether) to give the desired product **3gg** (43.08 mg, 41% yield) as colorless oil. **<sup>1</sup>H NMR** (600 MHz, Chloroform-*d*)  $\delta$  7.10 (d, *J* = 8.5 Hz, 2H), 6.83 (d, *J* = 8.7 Hz, 2H), 3.79 (s, 3H), 2.58 (t, *J* = 7.5 Hz, 2H), 2.51 (t, *J* = 7.2 Hz, 2H), 2.08 (s, 3H), 1.73 – 1.67 (m, 2H), 1.65 – 1.60 (m, 2H). **<sup>13</sup>C NMR** (151 MHz, Chloroform-*d*)  $\delta$  157.67, 134.27, 129.19, 113.66, 55.19, 34.50, 34.06, 30.66, 28.59, 15.48. **HRMS (APCI)** *m/z*: M calcd for C<sub>12</sub>H<sub>18</sub>OS: 210.1078, found 210.1074.

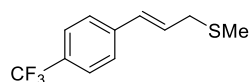

**3hh: (E)-methyl(3-(4-(trifluoromethyl)phenyl)allyl)sulfane.**

Following the general procedure A, AlCl<sub>3</sub> (0.1 mmol, 13.48 mg), ZnI<sub>2</sub> (0.2mmol, 63.78 mg), **1hh** (0.2 mmol, 42.12 mg), Me<sub>2</sub>S (1 mmol, 73  $\mu$ L) and cyclohexane (1 mL). The reaction was stirred at 120 °C for 24 hours and purified through flash chromatography (100% petroleum ether) to give the desired product **3hh** (23.22 mg, 50% yield) as a colorless oil. **<sup>1</sup>H NMR** (600 MHz, Chloroform-*d*)  $\delta$  7.56 (d, *J* = 8.0 Hz, 2H), 7.47 (d, *J* = 8.0 Hz, 2H), 6.46 (d, *J* = 15.7 Hz, 1H), 6.28 (dt, *J* = 15.3, 7.4 Hz, 1H), 3.28 (d, *J* = 7.4 Hz, 2H), 2.07 (s, 3H). **<sup>13</sup>C NMR** (151 MHz, Chloroform-*d*)  $\delta$  140.19, 130.76, 128.45, 126.41, 125.56, 125.53, 125.51, 125.48, 36.20, 14.50.

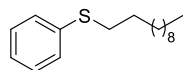

**4a: phenyl(undecyl)sulfane.**<sup>13</sup>

Following the general procedure A, AlCl<sub>3</sub> (0.1 mmol, 13.33 mg), ZnI<sub>2</sub> (0.2mmol, 63.50 mg), **1a** (0.2 mmol, 34.66 mg), **2a** (1 mmol, 118  $\mu$ L) and cyclohexane (1 mL). The reaction was stirred at 120 °C for 24 hours and purified through flash chromatography (100% petroleum ether) to give the desired product **4a** (38.04 mg, 72% yield) as a colorless oil. **<sup>1</sup>H NMR** (600 MHz, Chloroform-*d*)  $\delta$  7.35 (d, *J* = 7.8 Hz, 2H), 7.30 (t, *J* = 7.8 Hz, 2H), 7.19 (t, *J* = 7.4 Hz, 1H), 2.95 (t, *J* = 7.5 Hz, 2H), 1.68 (p, *J* = 7.5 Hz, 2H), 1.45 (t, *J* = 7.4 Hz, 2H), 1.30 (d, *J* = 8.5 Hz, 14H), 0.92 (t, *J* = 7.0 Hz, 3H).

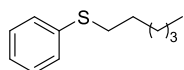

**4b: Hexyl(phenyl)sulfane.** <sup>14</sup>

Following the general procedure A,  $\text{AlCl}_3$  (0.1 mmol, 13.29 mg),  $\text{ZnI}_2$  (0.2 mmol, 63.86 mg), **1b-2** (0.2 mmol, 42.12 mg), **2a** (1 mmol, 118  $\mu\text{L}$ ) and cyclohexane (1 mL). The reaction was stirred at 120 °C for 24 hours and purified through flash chromatography (100% petroleum ether) to give the desired product **4b** (27.17 mg, 70% yield) as a colorless oil.  $^1\text{H NMR}$  (600 MHz, Chloroform-*d*)  $\delta$  7.31 (d,  $J$  = 7.8 Hz, 2H), 7.26 (t,  $J$  = 7.9 Hz, 2H), 7.15 (t,  $J$  = 7.4 Hz, 1H), 2.90 (t,  $J$  = 7.5 Hz, 2H), 1.63 (p,  $J$  = 7.5 Hz, 2H), 1.41 (q,  $J$  = 7.2 Hz, 2H), 1.28 (s, 4H), 0.87 (t,  $J$  = 6.7 Hz, 3H).

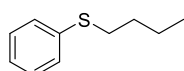

**4c: Butyl(phenyl)sulfane.** <sup>14</sup>

Following the general procedure A,  $\text{AlCl}_3$  (0.2 mmol, 26.67 mg),  $\text{ZnI}_2$  (0.4 mmol, 127.15 mg), **1c-2** (0.4 mmol, 37  $\mu\text{L}$ ), **2c** (2.0 mmol, 235  $\mu\text{L}$ ) and cyclohexane (1 mL). The reaction was stirred at 120 °C for 24 hours and purified through flash chromatography (100% petroleum ether) to give the desired product **4c** (43.83, 66% yield) as a colorless oil.  $^1\text{H NMR}$  (600 MHz, Chloroform-*d*)  $\delta$  7.32 (d,  $J$  = 7.8 Hz, 2H), 7.28 (d,  $J$  = 7.6 Hz, 2H), 7.16 (t,  $J$  = 7.4 Hz, 1H), 2.92 (t,  $J$  = 7.6 Hz, 2H), 1.64 (p,  $J$  = 7.6 Hz, 2H), 1.45 (h,  $J$  = 7.4 Hz, 2H), 0.92 (t,  $J$  = 7.4 Hz, 3H).

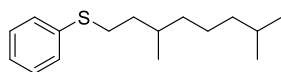

**4d: (3,7-dimethyloctyl)(phenyl)sulfane.**

Following the general procedure A,  $\text{AlCl}_3$  (0.1 mmol, 13.68 mg),  $\text{ZnI}_2$  (0.2 mmol, 63.96 mg), **1c** (0.2 mmol, 39  $\mu\text{L}$  mg), **2a** (1 mmol, 118  $\mu\text{L}$ ) and cyclohexane (1 mL). The reaction was stirred at 120 °C for 24 hours and purified through flash chromatography (100% petroleum ether) to give the desired product **4d** (36.02, 72% yield) as a colorless oil.  $^1\text{H NMR}$  (600 MHz, Chloroform-*d*)  $\delta$  7.37 – 7.21 (m, 4H), 7.15 (t,  $J$  = 6.6 Hz, 1H), 3.00 – 2.83 (m, 2H), 1.65 (dd,  $J$  = 16.2, 7.1 Hz, 1H), 1.56 – 1.40 (m, 3H), 1.20 (d,  $J$  = 94.8 Hz, 6H), 0.87 (dd,  $J$  = 25.1, 4.5 Hz, 9H).  $^{13}\text{C NMR}$  (151 MHz, Chloroform-*d*)  $\delta$  137.05, 128.77, 128.75, 125.57, 39.18, 36.87, 36.19, 32.21, 31.38, 27.93, 24.61, 22.67, 22.57, 19.34. **HRMS (APCI)**  $m/z$ : M calcd for  $\text{C}_{16}\text{H}_{26}\text{S}$ : 250.1755, found 250.1749.

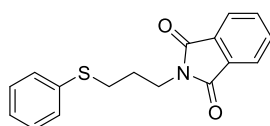

**4e: 2-(3-(phenylthio)propyl)isoindoline-1,3-dione.** <sup>15</sup>

Following the general procedure A,  $\text{AlCl}_3$  (0.25 mmol, 33.35 mg),  $\text{ZnI}_2$  (0.5 mmol, 159.61 mg), **1g** (0.5 mmol, 102.61 mg), **2a** (2.5 mmol, 300  $\mu\text{L}$ ) and cyclohexane (1 mL). The reaction was stirred at 120 °C for 24 hours and purified through flash chromatography (100% petroleum ether) to give the desired product **4e** (123.26 mg, 83% yield) as a white solid.  $^1\text{H NMR}$  (600 MHz, Chloroform-*d*)  $\delta$  7.84 (dd,  $J$  = 5.6, 3.0 Hz, 2H), 7.72 (dd,  $J$  = 5.7, 3.1

Hz, 2H), 7.36 (d,  $J = 7.3$  Hz, 2H), 7.28 (s, 2H), 7.19 (t,  $J = 7.4$  Hz, 1H), 3.83 (t,  $J = 6.8$  Hz, 2H), 2.96 (t,  $J = 7.1$  Hz, 2H), 2.01 (q,  $J = 7.2$  Hz, 2H).

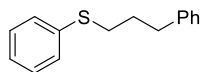

**4f: Phenyl(3-phenylpropyl)sulfane.** <sup>16</sup>

Following the general procedure A,  $\text{AlCl}_3$  (0.1 mmol, 13.55 mg),  $\text{ZnI}_2$  (0.2mmol, 63.52 mg), **1dd** (0.2 mmol, 27.24 mg), **2a** (1 mmol, 118 uL) and cyclohexane (1 mL). The reaction was stirred at 120 °C for 24 hours and purified through flash chromatography (100% petroleum ether) to give the desired product **4f** (31.06, 68% yield) as a colorless oil. **<sup>1</sup>H NMR** (600 MHz, Chloroform-*d*)  $\delta$  7.29 (dt,  $J = 16.5, 8.5$  Hz, 6H), 7.19 (p,  $J = 7.6$  Hz, 4H), 2.93 (t,  $J = 7.0$  Hz, 2H), 2.77 (t,  $J = 7.2$  Hz, 2H), 1.99 (q,  $J = 7.2$  Hz, 2H).

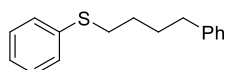

**4g: Phenyl(4-phenylbutyl)sulfane.** <sup>16</sup>

Following the general procedure A,  $\text{AlCl}_3$  (0.1 mmol, 13.39 mg),  $\text{ZnI}_2$  (0.2mmol, 63.84 mg), **1ff** (0.2 mmol, 30.04 mg), **2a** (1 mmol, 118 uL) and cyclohexane (1 mL). The reaction was stirred at 120 °C for 24 hours and purified through flash chromatography (100% petroleum ether) to give the desired product **4g** (30.03 mg, 62% yield) as a colorless oil. **<sup>1</sup>H NMR** (600 MHz, Chloroform-*d*)  $\delta$  7.35 – 7.25 (m, 6H), 7.17 (d,  $J = 7.5$  Hz, 4H), 2.95 (t,  $J = 7.4$  Hz, 2H), 2.64 (t,  $J = 7.7$  Hz, 2H), 1.74 (dd,  $J = 39.2, 7.7$  Hz, 4H).

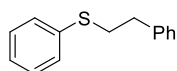

**4h: Phenethyl(phenyl)sulfane.** <sup>17</sup>

Following the general procedure A,  $\text{AlCl}_3$  (0.1 mmol, 13.35 mg),  $\text{ZnI}_2$  (0.2mmol, 63.89 mg), **1q** (0.2 mmol, 24 uL), **2a** (1 mmol, 118 uL) and cyclohexane (1 mL). The reaction was stirred at 120 °C for 24 hours and purified through flash chromatography (100% petroleum ether) to give the desired product **4h** (36.11 mg, 82% yield) as a colorless oil. **<sup>1</sup>H NMR** (600 MHz, Chloroform-*d*)  $\delta$  7.37 (d,  $J = 7.7$  Hz, 2H), 7.30 (d,  $J = 3.9$  Hz, 4H), 7.21 (d,  $J = 8.3$  Hz, 4H), 3.22 – 3.14 (m, 2H), 2.94 (t,  $J = 8.1$  Hz, 2H).

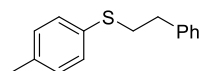

**4i: Phenethyl(p-tolyl)sulfane.** <sup>17</sup>

Following the general procedure A,  $\text{AlCl}_3$  (0.1 mmol, 13.34 mg),  $\text{ZnI}_2$  (0.2mmol, 63.85 mg), **1q** (0.2 mmol, 24.90 mg), **2i** (1 mmol, 134 uL) and cyclohexane (1 mL). The reaction was stirred at 120 °C for 24 hours and purified through flash chromatography (100% petroleum ether) to give the desired product **4b** (30.08 mg, 66% yield) as a colorless oil. **<sup>1</sup>H NMR** (600 MHz, Chloroform-*d*)  $\delta$  7.34 – 7.26 (m, 4H), 7.25 – 7.17 (m, 3H), 7.13 (d,  $J = 7.7$  Hz, 2H), 3.13 (t,  $J = 7.8$  Hz, 2H), 2.91 (t,  $J =$

7.6 Hz, 2H), 2.34 (s, 3H).

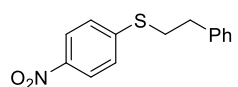

**4j: (4-nitrophenyl)(phenethyl)sulfane.** <sup>18</sup>

Following the general procedure A, AlCl<sub>3</sub> (0.1 mmol, 13.53 mg), ZnI<sub>2</sub> (0.2mmol, 63.97 mg), **1q** (0.2 mmol, 24.43 mg), **2j** (1 mmol, 169.20 mg) and cyclohexane (1 mL). The reaction was stirred at 120 °C for 24 hours and purified through flash chromatography (100% petroleum ether) to give the desired product **4j** (23.09 mg, 44% yield) as white solid. <sup>1</sup>H NMR (600 MHz, Chloroform-*d*) δ 8.16 (dd, *J* = 9.0, 4.3 Hz, 2H), 7.31 (dd, *J* = 60.4, 8.4 Hz, 7H), 3.33 – 3.30, (m, 2H), 3.06 – 3.03 (m, 2H).

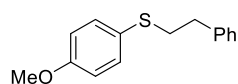

**4k: (4-methoxyphenyl)(phenethyl)sulfane.** <sup>17</sup>

Following the general procedure A, AlCl<sub>3</sub> (0.1 mmol, 13.23 mg), ZnI<sub>2</sub> (0.2mmol, 64.09 mg), **1q** (0.2 mmol, 24.76 mg), **2k** (1 mmol, 139 uL) and cyclohexane (1 mL). The reaction was stirred at 120 °C for 24 hours and purified through flash chromatography (100% petroleum ether) to give the desired product **4k** (15.10 mg, 31% yield) as a colorless oil. <sup>1</sup>H NMR (600 MHz, Chloroform-*d*) δ 7.46 – 7.38 (m, 2H), 7.34 – 7.19 (m, 5H), 6.96 – 6.82 (m, 2H), 3.84 (s, 3H), 3.14 – 3.06 (m, 2H), 2.95 – 2.87 (m, 2H).

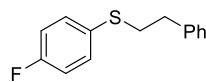

**4l: (4-fluorophenyl)(phenethyl)sulfane.** <sup>19</sup>

Following the general procedure A, AlCl<sub>3</sub> (0.1 mmol, 13.88 mg), ZnI<sub>2</sub> (0.2mmol, 63.36 mg), **1q** (0.2 mmol, 23.66 mg), **2l** (1 mmol, 122 uL) and cyclohexane (1 mL). The reaction was stirred at 120 °C for 24 hours and purified through flash chromatography (100% petroleum ether) to give the desired product **4l** (34.01 mg, 73% yield) as a colorless oil. <sup>1</sup>H NMR (600 MHz, Chloroform-*d*) δ 7.36 (t, *J* = 4.5 Hz, 2H), 7.33 – 7.28 (m, 2H), 7.25 – 7.15 (m, 3H), 7.01 (t, *J* = 8.7 Hz, 2H), 3.12 (t, *J* = 8.0 Hz, 2H), 2.90 (t, *J* = 8.0 Hz, 2H).

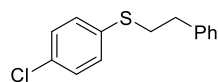

**4m: (4-chlorophenyl)(phenethyl)sulfane.** <sup>19</sup>

Following the general procedure A, AlCl<sub>3</sub> (0.1 mmol, 13.45 mg), ZnI<sub>2</sub> (0.2mmol, 63.95 mg), **1q** (0.2 mmol, 25.03 mg), **2m** (1 mmol, 130 uL) and cyclohexane (1 mL). The reaction was stirred at 120 °C for 24 hours and purified through flash chromatography (100% petroleum ether) to give the desired product **4m** (37.20 mg, 75% yield) as a colorless oil. <sup>1</sup>H NMR (600 MHz, Chloroform-*d*) δ 7.33 – 7.21 (m, 7H), 7.19 (d, *J* = 7.4 Hz, 2H), 3.18 – 3.11 (m, 2H), 2.92 (t, *J* = 8.0 Hz, 2H).

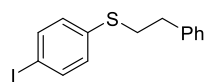

**4n: (4-iodophenyl)(phenethyl)sulfane.**

Following the general procedure A, AlCl<sub>3</sub> (0.1 mmol, 13.36 mg), ZnI<sub>2</sub> (0.2mmol,

63.76 mg), **1q** (0.2 mmol, 24.67 mg), **2n** (1 mmol, 250.92mg) and cyclohexane (1 mL). The reaction was stirred at 120 °C for 24 hours and purified through flash chromatography (100% petroleum ether) to give the desired product **4n** (38.75 mg, 57% yield) as a white solid. <sup>1</sup>H NMR (600 MHz, Chloroform-*d*) δ 7.60 (dd, *J* = 8.5, 2.7 Hz, 2H), 7.35 – 7.15 (m, 6H), 7.08 (dd, *J* = 8.5, 2.7 Hz, 2H), 3.17 – 3.13 (m, 2H), 2.94 – 2.90 (m, 2H). <sup>13</sup>C NMR (151 MHz, Chloroform-*d*) δ 139.85, 137.80, 136.57, 130.65, 128.53, 128.46, 126.53, 90.54, 35.41, 34.86.

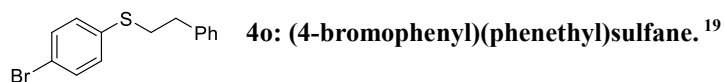

Following the general procedure A, AlCl<sub>3</sub> (0.1 mmol, 13.95 mg), ZnI<sub>2</sub> (0.2mmol, 64.08 mg), **1q** (0.2 mmol, 25.14 mg), **2o** (1 mmol, 204.13 mg) and cyclohexane (1 mL). The reaction was stirred at 120 °C for 24 hours and purified through flash chromatography (100% petroleum ether) to give the desired product **4o** (37.98 mg, 65% yield) as a white solid. <sup>1</sup>H NMR (600 MHz, Chloroform-*d*) δ 7.41 (d, *J* = 8.3 Hz, 2H), 7.30 (d, *J* = 7.7 Hz, 2H), 7.22 (dt, *J* = 19.4, 8.2 Hz, 5H), 3.16 (t, *J* = 7.6 Hz, 2H), 2.93 (d, *J* = 8.3 Hz, 2H).

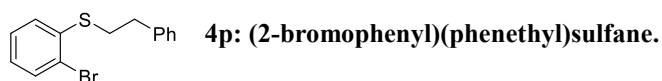

Following the general procedure A, AlCl<sub>3</sub> (0.1 mmol, 13.46 mg), ZnI<sub>2</sub> (0.2mmol, 64.53 mg), **1q** (0.2 mmol, 24.43 mg), **2p** (1 mmol, 203.13 mg) and cyclohexane (1 mL). The reaction was stirred at 120 °C for 24 hours and purified through flash chromatography (100% petroleum ether) to give the desired product **4p** (35.09 mg, 60% yield) as a colorless oil. <sup>1</sup>H NMR (600 MHz, Chloroform-*d*) δ 7.56 (d, *J* = 8.1 Hz, 1H), 7.36 – 7.19 (m, 7H), 7.04 (q, *J* = 4.2, 3.7 Hz, 1H), 3.20 (t, *J* = 8.1 Hz, 2H), 2.99 (t, *J* = 8.1 Hz, 2H). <sup>13</sup>C NMR (151 MHz, Chloroform-*d*) δ 139.93, 137.88, 133.01, 128.57, 128.44, 127.93, 127.70, 126.56, 126.52, 123.54, 34.99, 34.30.

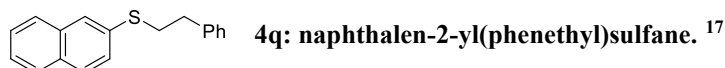

Following the general procedure A, AlCl<sub>3</sub> (0.1 mmol, 13.36 mg), ZnI<sub>2</sub> (0.2mmol, 63.89 mg), **1q** (0.2 mmol, 25.16 mg), **2q** (1 mmol, 174.26 mg) and cyclohexane (1 mL). The reaction was stirred at 120 °C for 24 hours and purified through flash chromatography (100% petroleum ether) to give the desired product **4q** (33.28 mg, 63% yield) as a white solid. <sup>1</sup>H NMR (600 MHz, Chloroform-*d*) δ 7.84 (d, *J* = 8.0 Hz, 1H), 7.82 – 7.75 (m, 3H), 7.55 – 7.45 (m, 3H), 7.35 (d, *J* = 7.5 Hz, 2H), 7.27 (t, *J* = 8.4 Hz, 3H), 3.32 (t, *J* = 7.9 Hz, 2H), 3.02 (t, *J* = 8.0 Hz, 2H).

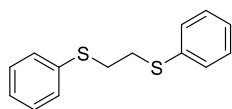

**4r: 1,2-bis(phenylthio)ethane.** <sup>20</sup>

Following the general procedure A,  $\text{AlCl}_3$  (0.25 mmol, 34.07 mg),  $\text{ZnI}_2$  (0.5 mmol, 159.60 mg), **1r** (0.5 mmol, 35.67 mg), **2a** (2.5 mmol, 300  $\mu\text{L}$ ) and cyclohexane (1 mL). The reaction was stirred at 120 °C for 24 hours and purified through flash chromatography (100% petroleum ether) to give the desired product **4r** (56.59 mg, 46% yield) as a white solid.  $^1\text{H}$  NMR (400 MHz, Chloroform-*d*)  $\delta$  7.34 – 7.26 (m, 8H), 7.24 – 7.17 (m, 2H), 3.09 (s, 4H).

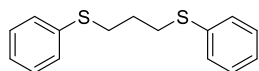

**4s: 1,3-bis(phenylthio)propane.** <sup>21</sup>

Following the general procedure A,  $\text{AlCl}_3$  (0.25 mmol, 33.73 mg),  $\text{ZnI}_2$  (0.5 mmol, 161.20 mg), **1s** (0.5 mmol, 39.07 mg), **2a** (2.5 mmol, 293  $\mu\text{L}$ ) and cyclohexane (1 mL). The reaction was stirred at 120 °C for 24 hours and purified through flash chromatography (100% petroleum ether) to give the desired product **4s** (45.51 mg, 35% yield) as a white solid.  $^1\text{H}$  NMR (400 MHz, Chloroform-*d*)  $\delta$  7.38 – 7.32 (m, 4H), 7.32 – 7.26 (m, 4H), 7.23 – 7.15 (m, 2H), 3.08 (t,  $J$  = 7.0 Hz, 4H), 1.98 (p,  $J$  = 7.0 Hz, 2H).

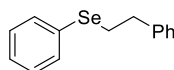

**4t: Phenethyl(phenyl)selane.** <sup>22</sup>

Following the general procedure A,  $\text{AlCl}_3$  (0.1 mmol, 13.78 mg),  $\text{ZnI}_2$  (0.2 mmol, 63.89 mg), **1q** (0.2 mmol, 24.43 mg), **2t** (1 mmol, 124  $\mu\text{L}$ ) and cyclohexane (1 mL). The reaction was stirred at 120 °C for 24 hours and purified through flash chromatography (100% petroleum ether) to give the desired product **4t** (38.90 mg, 74% yield) as a colorless oil.  $^1\text{H}$  NMR (600 MHz, Chloroform-*d*)  $\delta$  7.54 (d,  $J$  = 7.2 Hz, 2H), 7.33 – 7.20 (m, 8H), 3.18 (t,  $J$  = 8.0 Hz, 2H), 3.03 (t,  $J$  = 8.0 Hz, 2H).

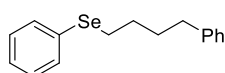

**4u: phenyl(4-phenylbutyl)selane.** <sup>23</sup>

Following the general procedure A,  $\text{AlCl}_3$  (0.1 mmol, 13.12 mg),  $\text{ZnI}_2$  (0.2 mmol, 63.99 mg), **1ff** (0.2 mmol, 29.92 mg), **2t** (1 mmol, 171.11 mg) and cyclohexane (1 mL). The reaction was stirred at 120 °C for 24 hours and purified through flash chromatography (100% petroleum ether) to give the desired product **4u** (38.84 mg, 67% yield) as a colorless oil.  $^1\text{H}$  NMR (600 MHz, Chloroform-*d*)  $\delta$  7.51 (d,  $J$  = 7.1 Hz, 2H), 7.29 (dd,  $J$  = 11.5, 7.6 Hz, 5H), 7.20 (t,  $J$  = 9.7 Hz, 3H), 2.97 (d,  $J$  = 6.3 Hz, 2H), 2.66 (d,  $J$  = 6.7 Hz, 2H), 1.78 (q,  $J$  = 3.9, 3.3 Hz, 4H).

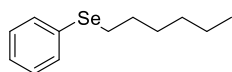

**4v: hexyl(phenyl)selane.** <sup>24</sup>

Following the general procedure A,  $\text{AlCl}_3$  (0.1 mmol, 13.13 mg),  $\text{ZnI}_2$  (0.2 mmol, 64.11 mg), **1b-2** (0.2 mmol, 25  $\mu\text{L}$ ), **2t** (1 mmol, 171.15 mg) and cyclohexane (1 mL). The reaction was

stirred at 120 °C for 24 hours and purified through flash chromatography (100% petroleum ether) to give the desired product **4v** (36.05 mg, 70% yield) as a colorless oil. <sup>1</sup>H NMR (600 MHz, Chloroform-*d*) δ 7.51 (d, *J* = 7.4 Hz, 2H), 7.26 (dd, *J* = 12.9, 7.1 Hz, 3H), 2.94 (t, *J* = 7.4 Hz, 2H), 1.73 (p, *J* = 7.6 Hz, 2H), 1.43 (t, *J* = 7.4 Hz, 2H), 1.31 (dd, *J* = 7.0, 3.5 Hz, 4H), 0.91 (t, *J* = 6.6 Hz, 3H).

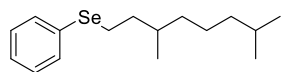

**4w: (3,7-dimethyloctyl)(phenyl)selane.**

Following the general procedure A, AlCl<sub>3</sub> (0.1 mmol, 13.85 mg), ZnI<sub>2</sub> (0.2mmol, 64.24 mg), **1c** (0.2 mmol, 38 uL), **2t** (1 mmol, 171.06 mg) and cyclohexane (1 mL). The reaction was stirred at 120 °C for 24 hours and purified through flash chromatography (100% petroleum ether) to give the desired product **4v** (52.95 mg, 89% yield) as a colorless oil. <sup>1</sup>H NMR (600 MHz, Chloroform-*d*) δ 7.51 (d, *J* = 7.4 Hz, 2H), 7.27 (dq, *J* = 13.3, 6.9, 5.5 Hz, 3H), 3.03 – 2.88 (m, 2H), 1.74 (q, *J* = 9.4, 8.6 Hz, 1H), 1.58 – 1.49 (m, 3H), 1.28 (ddd, *J* = 27.3, 13.7, 6.9 Hz, 3H), 1.14 (dq, *J* = 16.6, 7.9, 7.2 Hz, 3H), 0.90 (dd, *J* = 14.1, 6.1 Hz, 9H). <sup>13</sup>C NMR (151 MHz, Chloroform-*d*) δ 132.30, 130.70, 128.95, 126.55, 39.21, 37.26, 36.79, 33.13, 27.95, 25.71, 24.62, 22.69, 22.59, 19.27.

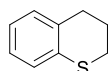

**6a: Thiochromane.** <sup>26</sup>

Following the general procedure B, AlCl<sub>3</sub> (0.1 mmol, 13.38mg), **5a** (0.2 mmol, 36.46 mg), and cyclohexane (1mL). The reaction was stirred at 120 °C for 24 hours and purified through flash chromatography (100% petroleum ether) to give the desired product **6a** (24.64 mg, 82% yield) as a colorless oil. <sup>1</sup>H NMR (600 MHz, Chloroform-*d*) δ 7.15 – 6.92 (m, 4H), 3.07 – 3.00 (m, 2H), 2.82 (t, *J* = 6.2 Hz, 2H), 2.13 (q, *J* = 6.0 Hz, 2H).

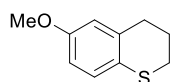

**6b: 6-methoxythiochromane.** <sup>26</sup>

Following the general procedure B, AlCl<sub>3</sub> (0.1 mmol, 13.23 mg), **5b** (0.2 mmol, 44.78 mg) and cyclohexane (1 mL). The reaction was stirred at 120 °C for 24 hours and purified through flash chromatography (100% petroleum ether) to give the desired product **6b** (27.03 mg, 75% yield) as a colorless oil. <sup>1</sup>H NMR (600 MHz, Chloroform-*d*) δ 7.00 (d, *J* = 8.6 Hz, 1H), 6.67 (dd, *J* = 8.6, 2.8 Hz, 1H), 6.62 (d, *J* = 2.9 Hz, 1H), 3.76 (s, 3H), 3.04 – 2.96 (m, 2H), 2.79 (t, *J* = 6.2 Hz, 2H), 2.09 (p, *J* = 6.1 Hz, 2H).

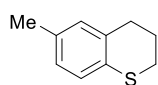

**6c: 6-methylthiochromane.** <sup>26</sup>

Following the general procedure B, AlCl<sub>3</sub> (0.1 mmol, 13.36 mg), **5c** (0.2 mmol, 42.71 mg) and cyclohexane (1 mL). The reaction was stirred at 120 °C for 24 hours and purified through flash



chromatography (100% petroleum ether) to give the desired product **6c** (26.11 mg, 80% yield) as a colorless oil. <sup>1</sup>H NMR (600 MHz, Chloroform-*d*) δ 6.98 (d, *J* = 7.9 Hz, 1H), 6.88 (d, *J* = 8.1 Hz, 1H), 6.85 (s, 1H), 3.05 – 2.98 (m, 2H), 2.77 (t, *J* = 6.2 Hz, 2H), 2.25 (s, 3H), 2.10 (t, *J* = 6.0 Hz, 2H).

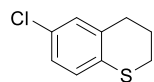

**6d: 6-chlorothiochromane.** <sup>27</sup>

Following the general procedure B, AlCl<sub>3</sub> (0.1 mmol, 13.57 mg), **5d** (0.2 mmol, 44.73 mg) and cyclohexane (1 mL). The reaction was stirred at 120 °C for 24 hours and purified through flash chromatography (100% petroleum ether) to give the desired product **6d** (33.11 mg, 90% yield) as a colorless oil. <sup>1</sup>H NMR (600 MHz, Chloroform-*d*) δ 7.01 (d, *J* = 4.0 Hz, 3H), 3.05 – 2.98 (m, 2H), 2.78 (t, *J* = 6.2 Hz, 2H), 2.09 (p, *J* = 6.1 Hz, 2H).

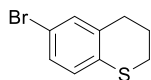

**6e: 6-bromothiochromane.**

Following the general procedure B, AlCl<sub>3</sub> (0.05 mmol, 6.76 mg), **5e** (0.1 mmol, 26.33 mg) and cyclohexane (1 mL). The reaction was stirred at 120 °C for 24 hours and purified through flash chromatography (100% petroleum ether) to give the desired product **6e** (16.18 mg, 71% yield) as a colorless oil. <sup>1</sup>H NMR (600 MHz, Chloroform-*d*) δ 7.16 (s, 2H), 6.95 (d, *J* = 8.3 Hz, 1H), 3.01 (dd, *J* = 7.3, 4.4 Hz, 2H), 2.78 (t, *J* = 6.2 Hz, 2H), 2.09 (t, *J* = 5.9 Hz, 2H). <sup>13</sup>C NMR (151 MHz, Chloroform-*d*) δ 135.84, 132.48, 132.15, 129.29, 127.97, 116.92, 29.48, 27.40, 22.41. HRMS (APCI) *m/z*: M calcd for C<sub>9</sub>H<sub>9</sub>BrS: 227.9608, found 227.9604.

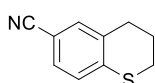

**6f: thiochromane-6-carbonitrile.**

Following the general procedure B, AlCl<sub>3</sub> (0.05 mmol, 6.79 mg), **5f** (0.1 mmol, 20.68 mg) and cyclohexane (1 mL). The reaction was stirred at 120 °C for 24 hours and purified through flash chromatography (100% petroleum ether) to give the desired product **6f** (6.21 mg, 34% yield) as a colorless oil. <sup>1</sup>H NMR (600 MHz, Chloroform-*d*) δ 7.30 – 7.26 (m, 2H), 7.14 (d, *J* = 8.1 Hz, 1H), 3.08 – 3.04 (m, 2H), 2.83 – 2.80 (m, 2H), 2.14 – 2.09 (m, 2H). <sup>13</sup>C NMR (151 MHz, Chloroform-*d*) δ 135.44, 131.42, 129.61, 129.18, 127.64, 126.44, 29.53, 27.40, 22.44. HRMS (APCI) *m/z*: M calcd for C<sub>10</sub>H<sub>9</sub>NS: 175.0456, found 175.0451.

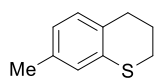

**6g: 7-methylthiochromane.**

Following the general procedure B, AlCl<sub>3</sub> (0.1 mmol, 13.68 mg), **5g** (0.2 mmol, 41.78 mg) and cyclohexane (1 mL). The reaction was stirred at 120 °C for 24 hours and purified through flash chromatography (100% petroleum ether) to give the desired product **6g** (26.12 mg, 80% yield) as a

colorless oil. **<sup>1</sup>H NMR** (600 MHz, Chloroform-*d*)  $\delta$  6.98 (d,  $J$  = 7.9 Hz, 1H), 6.88 (d,  $J$  = 8.1 Hz, 1H), 6.85 (s, 1H), 3.01 (t,  $J$  = 6.0 Hz, 2H), 2.77 (t,  $J$  = 6.2 Hz, 2H), 2.25 (s, 3H), 2.10 (q,  $J$  = 6.0 Hz, 2H). **<sup>13</sup>C NMR** (101 MHz, Chloroform-*d*)  $\delta$  133.68, 133.46, 130.65, 129.17, 127.24, 126.44, 29.59, 27.51, 23.04, 20.72. **HRMS (APCI)**  $m/z$ : M calcd for C<sub>10</sub>H<sub>12</sub>S: 164.0660, found 164.0655.

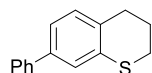

**6h: 7-phenylthiochromane.**

Following the general procedure B, AlCl<sub>3</sub> (0.1 mmol, 13.82 mg), **5h** (0.2 mmol, 51.77 mg) and cyclohexane (1 mL). The reaction was stirred at 120 °C for 24 hours and purified through flash chromatography (100% petroleum ether) to give the desired product **6h** (31.20 mg, 69% yield) as a white solid. **<sup>1</sup>H NMR** (600 MHz, Chloroform-*d*)  $\delta$  7.56 (d,  $J$  = 7.6 Hz, 2H), 7.42 (t,  $J$  = 7.7 Hz, 2H), 7.37 – 7.27 (m, 2H), 7.22 (d,  $J$  = 7.9 Hz, 1H), 7.10 (d,  $J$  = 8.0 Hz, 1H), 3.14 – 3.03 (m, 2H), 2.86 (t,  $J$  = 6.4 Hz, 2H), 2.24 – 2.11 (m, 2H). **<sup>13</sup>C NMR** (151 MHz, Chloroform-*d*)  $\delta$  140.55, 139.48, 133.29, 132.81, 130.32, 128.66, 127.18, 126.88, 125.03, 122.80, 29.35, 27.62, 22.92. **HRMS (APCI)**  $m/z$ : M calcd for C<sub>15</sub>H<sub>14</sub>S: 226.0816, found 226.0811.

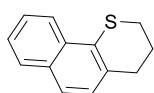

**6i: 3,4-dihydro-2H-benzo[h]thiochromene.** <sup>26</sup>

Following the general procedure B, AlCl<sub>3</sub> (0.05 mmol, 6.66 mg), **5i** (0.1 mmol, 23.69 mg) and cyclohexane (1 mL). The reaction was stirred at 120 °C for 24 hours and purified through flash chromatography (100% petroleum ether) to give the desired product **6i** (13.01 mg, 65% yield) as a white solid. **<sup>1</sup>H NMR** (600 MHz, Chloroform-*d*)  $\delta$  8.09 (d,  $J$  = 8.4 Hz, 1H), 7.76 (d,  $J$  = 8.1 Hz, 1H), 7.49 (dd,  $J$  = 8.4, 5.3 Hz, 2H), 7.44 (t,  $J$  = 7.5 Hz, 1H), 7.14 (d,  $J$  = 8.4 Hz, 1H), 3.15 (t,  $J$  = 5.9 Hz, 2H), 3.00 (t,  $J$  = 6.3 Hz, 2H), 2.29 – 2.18 (m, 2H).

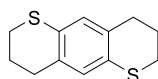

**6j: 2,3,4,7,8,9-hexahydrothiopyrano[2,3-g]thiochromene.**

Following the general procedure B, AlCl<sub>3</sub> (0.1 mmol, 13.45 mg), **5j** (0.1 mmol, 28.99 mg) and cyclohexane (0.5 mL). The reaction was stirred at 120 °C for 24 hours and purified through flash chromatography (100% petroleum ether) to give the desired product **6j** (8.20 mg, 37% yield) as a white solid. **<sup>1</sup>H NMR** (600 MHz, Chloroform-*d*)  $\delta$  6.77 (s, 2H), 3.01 – 2.96 (m, 4H), 2.71 (t,  $J$  = 6.1 Hz, 4H), 2.07 (p,  $J$  = 6.1 Hz, 4H). **<sup>13</sup>C NMR** (151 MHz, Chloroform-*d*)  $\delta$  132.36, 127.93, 127.62, 29.14, 27.54, 23.04. **HRMS (APCI)**  $m/z$ : M calcd for C<sub>12</sub>H<sub>14</sub>S<sub>2</sub>: 222.0537, found 222.0532.

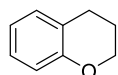

**6k: Chromane.** <sup>29</sup>

Following the general procedure B, AlCl<sub>3</sub> (0.1 mmol, 13.40 mg), **5k** (0.2 mmol, 35.47 mg)

and cyclohexane (1 mL). The reaction was stirred at 120 °C for 24 hours and purified through flash chromatography (100% petroleum ether) to give the desired product **6k** (13.63mg, 62% yield) as a colorless oil. <sup>1</sup>H NMR (400 MHz, CDCl<sub>3</sub>) δ 7.16 – 6.97 (m, 2H), 6.90 – 6.69 (m, 2H), 4.24 – 4.13 (m, 2H), 2.79 (t, *J* = 6.5 Hz, 2H), 2.06 – 1.96 (m, 2H).

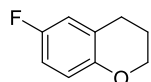

**6l: 6-fluorochromane.** <sup>29</sup>

Following the general procedure B, AlCl<sub>3</sub> (0.05 mmol, 6.65 mg), **5l** (0.1 mmol, 19.40 mg) and cyclohexane (0.5 mL). The reaction was stirred at 120 °C for 24 hours and purified through flash chromatography (100% petroleum ether) to give the desired product **6l** (9.12mg, 60% yield) as a colorless oil. <sup>1</sup>H NMR (400 MHz, CDCl<sub>3</sub>) δ 6.87 – 6.60 (m, 3H), 4.18 – 4.12 (m, 2H), 2.77 (t, *J* = 6.5 Hz, 2H), 2.02 – 1.95 (m, 2H).

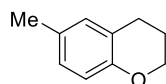

**6m: 6-methylchromane.** <sup>29</sup>

Following the general procedure B, AlCl<sub>3</sub> (0.1 mmol, 13.28 mg), **5m** (0.2 mmol, 37.11 mg) and cyclohexane (1 mL). The reaction was stirred at 120 °C for 24 hours and purified through flash chromatography (100% petroleum ether) to give the desired product **6m** (21.32 mg, 72% yield) as a colorless oil. <sup>1</sup>H NMR (400 MHz, CDCl<sub>3</sub>) δ 6.91 – 4.86(m, 2H), 6.71 (d, *J* = 8.2 Hz, 1H), 4.18 – 4.16 (m, 2H), 2.76 (t, *J* = 6.5 Hz, 2H), 2.26 (s, 3H), 2.03 – 1.97 (m, 2H).

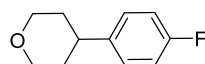

**6n: 4-(4-fluorophenyl) tetrahydro-2H-pyran.** <sup>29</sup>

Following the general procedure B, AlCl<sub>3</sub> (0.1 mmol, 13.57 mg), **5n** (0.2 mmol, 40.89 mg) and cyclohexane (1 mL). The reaction was stirred at 120 °C for 24 hours and purified through flash chromatography (100% petroleum ether) to give the desired product **6n** (19.82 mg, 66% yield) as a colorless oil. <sup>1</sup>H NMR (400 MHz, CDCl<sub>3</sub>) δ 7.19 – 7.16 (m, 2H), 7.02 – 6.98 (m, 2H), 4.11 – 4.04 (m, 2H), 3.52 (td, *J* = 11.3, 3.5 Hz, 2H), 2.80 – 2.68 (m, 1H), 1.84 – 1.72 (m, 4H).

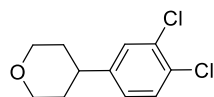

**6o: 4-(3,4-dichlorophenyl) tetrahydro-2H-pyran.** <sup>29</sup>

Following the general procedure B, AlCl<sub>3</sub> (0.05 mmol, 6.68 mg), **5o** (0.1 mmol, 26.91 mg) and cyclohexane (0.5 mL). The reaction was stirred at 120 °C for 24 hours and purified through flash chromatography (100% petroleum ether) to give the desired product **6o** (13.80 mg, 60% yield) as a colorless oil. <sup>1</sup>H NMR (400 MHz, CDCl<sub>3</sub>) δ 7.37 (d, *J* = 8.3 Hz, 1H), 7.30 (s, 1H), 7.05 (dd, *J* = 8.3, 2.1 Hz, 1H), 4.10 – 4.05 (m, 2H), 3.55 – 3.46 (m, 2H), 2.76 – 2.68 (m, 1H), 1.79 – 1.72 (m, 4H).

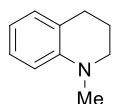

**6p: 1-methyl-1,2,3,4-tetrahydroquinoline.** <sup>28</sup>

Following the general procedure B,  $\text{AlCl}_3$  (0.1 mmol, 13.30 mg), **5p** (0.2 mmol, 37.17 mg) and cyclohexane (1 mL). The reaction was stirred at 120 °C for 24 hours and purified through flash chromatography (100% petroleum ether) to give the desired product **6p** (24.78 mg, 84% yield) as a colorless oil. colorless oil (25.11 mg, 85% yield).  $^1\text{H NMR}$  (600 MHz, Chloroform-*d*)  $\delta$  7.11 (t,  $J$  = 7.8 Hz, 1H), 6.99 (d,  $J$  = 7.2 Hz, 1H), 6.69 – 6.51 (m, 2H), 3.26 (t,  $J$  = 5.6 Hz, 2H), 2.92 (s, 3H), 2.81 (t,  $J$  = 6.4 Hz, 2H), 2.06 – 2.00 (m, 2H).

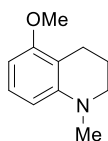

**6q: 5-methoxy-1-methyl-1,2,3,4-tetrahydroquinoline.** <sup>28</sup>

Following the general procedure B,  $\text{AlCl}_3$  (0.05 mmol, 6.77 mg), **5q** (0.1 mmol, 21.56 mg) and cyclohexane (0.5 mL). The reaction was stirred at 120 °C for 24 hours and purified through flash chromatography (100% petroleum ether) to give the desired product **6q** (10.63 mg, 60% yield) as a colorless oil.  $^1\text{H NMR}$  (600 MHz, Chloroform-*d*)  $\delta$  7.11 – 6.96 (m, 1H), 6.30 (dd,  $J$  = 33.1, 8.2 Hz, 2H), 3.79 (d,  $J$  = 3.0 Hz, 3H), 3.16 (dd,  $J$  = 6.9, 3.6 Hz, 2H), 2.88 (d,  $J$  = 3.1 Hz, 3H), 2.70 – 2.65 (m, 2H), 1.97 (t,  $J$  = 5.3 Hz, 2H).

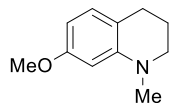

**6r: 7-methoxy-1-methyl-1,2,3,4-tetrahydroquinoline.** <sup>28</sup>

Following the general procedure B,  $\text{AlCl}_3$  (0.05 mmol, 6.85 mg), **5r** (0.1 mmol, 20.91 mg) and cyclohexane (0.5 mL). The reaction was stirred at 120 °C for 24 hours and purified through flash chromatography (100% petroleum ether) to give the desired product **6r** (12.57 mg, 71% yield) as a colorless oil.  $^1\text{H NMR}$  (600 MHz, Chloroform-*d*)  $\delta$  6.88 (d,  $J$  = 8.0 Hz, 1H), 6.25 – 6.15 (m, 2H), 3.80 (d,  $J$  = 2.2 Hz, 3H), 3.24 (d,  $J$  = 6.4 Hz, 2H), 2.90 (d,  $J$  = 2.2 Hz, 3H), 2.73 (t,  $J$  = 6.7 Hz, 2H), 2.01 – 1.95 (m, 2H).

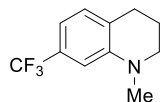

**6s: 1-methyl-7-(trifluoromethyl)-1,2,3,4-tetrahydroquinoline.**

Following the general procedure B,  $\text{AlCl}_3$  (0.05 mmol, 6.69 mg), **5s** (0.1 mmol, 25.72 mg) and cyclohexane (0.5 mL). The reaction was stirred at 120 °C for 24 hours and purified through flash chromatography (100% petroleum ether) to give the desired product **6s** (14.09 mg, 66% yield) as a colorless oil. colorless oil (14 mg, 66% yield).  $^1\text{H NMR}$  (600 MHz, Chloroform-*d*)  $\delta$  7.00 (d,  $J$  = 7.7 Hz, 1H), 6.82 (d,  $J$  = 7.7 Hz, 1H), 6.73 (s, 1H), 3.27 (t,  $J$  = 5.8 Hz, 2H), 2.92 (d,  $J$  = 1.7 Hz, 3H), 2.78 (t,  $J$  = 6.6 Hz, 2H), 1.98 (t,  $J$  = 6.2 Hz, 2H).  $^{13}\text{C NMR}$  (101 MHz, Chloroform-*d*)  $\delta$  146.65, 129.53, 129.22, 128.73, 126.28, 126.27, 126.04, 123.33, 112.37, 112.33, 112.29, 112.25, 106.81, 106.77, 106.73, 106.69,

50.95, 38.82, 27.76, 21.93. **HRMS (APCI)**  $m/z$ :  $M+H^+$  calcd for  $C_{11}H_{13}F_3N^+$ : 216.0995, found 216.0995.

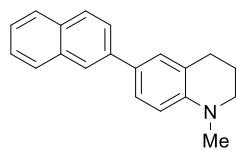

**6t: 1-methyl-6-(naphthalen-2-yl)-1,2,3,4-tetrahydroquinoline.**

Following the general procedure B,  $AlCl_3$  (0.05 mmol, 6.85 mg), **5t** (0.1 mmol, 32.09 mg) and cyclohexane (0.5 mL). The reaction was stirred at 120 °C for 24 hours and purified through flash chromatography (100% petroleum ether) to give the desired product **6t** (25.12 mg, 88% yield) as a white solid.  **$^1H$  NMR** (600 MHz, Chloroform- $d$ )  $\delta$  7.96 (s, 1H), 7.85 (d,  $J$  = 8.4 Hz, 2H), 7.82 (d,  $J$  = 8.0 Hz, 1H), 7.72 (d,  $J$  = 8.5 Hz, 1H), 7.51 – 7.44 (m, 2H), 7.44 – 7.40 (m, 1H), 7.37 (s, 1H), 6.71 (d,  $J$  = 8.5 Hz, 1H), 3.29 (t,  $J$  = 5.6 Hz, 2H), 2.96 (s, 3H), 2.88 (t,  $J$  = 6.6 Hz, 2H), 2.08 – 2.01 (m, 2H).  **$^{13}C$  NMR** (151 MHz, Chloroform- $d$ )  $\delta$  146.27, 138.71, 133.90, 131.97, 128.61, 128.08, 127.89, 127.66, 127.55, 125.98, 125.93, 125.31, 125.10, 123.97, 123.10, 111.24, 51.26, 39.09, 27.97, 22.44. **HRMS (APCI)**  $m/z$ :  $M+H^+$  calcd for  $C_{20}H_{20}N^+$ : 274.1590, found 274.1587.

## 5 Synthetic applications of C–O/C–S $\sigma$ -bond metathesis

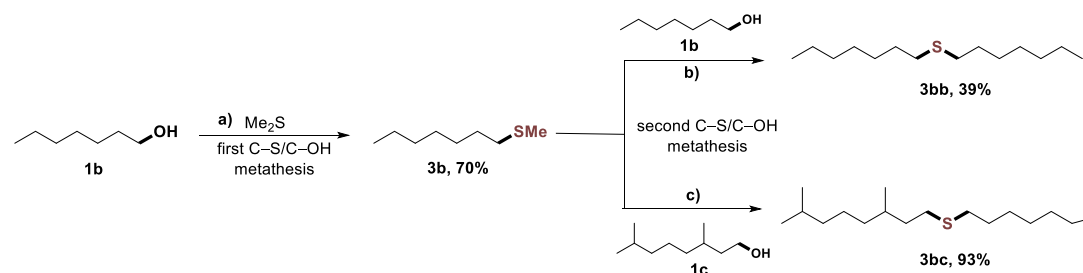

Figure S4: successive C–O/C–S  $\sigma$ -bond metathesis for  $Me_2S$  upgrading

- a)** To a 10 mL Schlenk tube was added  $AlCl_3$  (0.1 mmol, 13.19 mg),  $ZnI_2$  (0.2 mmol, 63.82 mg), **1b** (0.2 mmol, 28  $\mu$ L), thioether (1.0 mmol, 73  $\mu$ L) and cyclohexane (1 mL). The reaction mixture was stirred at 120 °C for 24 hours, then the reaction was cooled to room temperature. The crude mixture was purified by flash column chromatography to afford the target product **3b** (20.45 mg, 70% yield).
- b)** To a 10 mL Schlenk tube was added  $AlCl_3$  (0.1 mmol, 13.36 mg),  $ZnI_2$  (0.2 mmol, 63.90 mg), **3b** (0.2 mmol, 36  $\mu$ L), **1b** (0.4 mmol, 56  $\mu$ L) and cyclohexane (1 mL). The reaction mixture was stirred at 120 °C for 24 hours, then the reaction was cooled to room temperature. The crude mixture was purified by flash column chromatography to afford the target product **3bb** (18.0 mg, 39% yield).
- c)** To a 10 mL Schlenk tube was added  $AlCl_3$  (0.1 mmol, 13.32 mg),  $ZnI_2$  (0.2 mmol, 63.25 mg), **3b** (0.2 mmol, 36  $\mu$ L), **1c** (0.4 mmol, 78  $\mu$ L) and cyclohexane (1 mL). The reaction mixture was stirred at 120 °C for 24 hours, then the reaction was cooled to room temperature. The crude mixture was purified by

flash column chromatography to afford the target product **3bc** (50.67 mg, 93% yield).

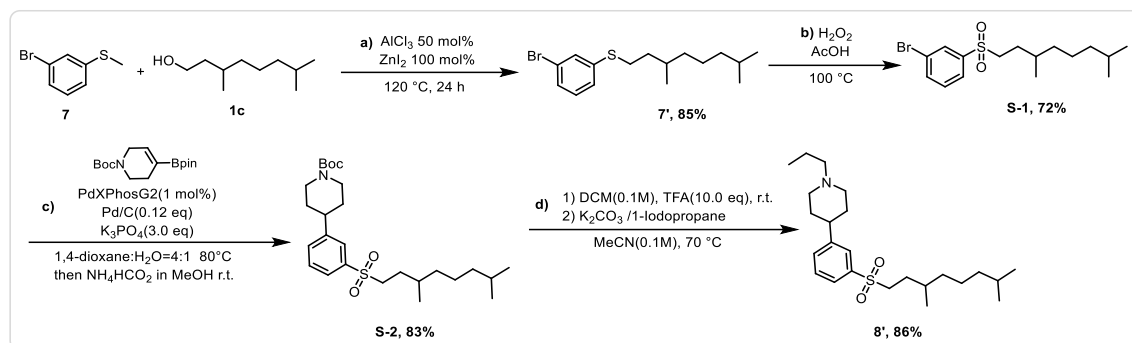

Figure S5: Pridopidine derivatization of **8'**

- a)** To a 10 mL Schlenk tube was added  $\text{AlCl}_3$  (0.1 mmol, 50 mol%),  $\text{ZnI}_2$  (0.2 mmol, 1.0 equiv.), **7** (1.0 mmol, 5.0 equiv.), **1c** (0.2 mmol, 1.0 equiv.) and cyclohexane (1 mL). The reaction mixture was stirred at 120 °C for 24 hours, then the reaction was cooled to room temperature. The crude mixture was purified by flash column chromatography to afford the target product **7'** (20.45 mg, 85% yield).
- b)** To a 10 mL Schlenk tube was added **7'** (5 mmol), AcOH (1.0 mL),  $\text{H}_2\text{O}_2$  (2.2 mL), the reaction mixture was stirred at 100 °C for 12 hours, then the reaction was cooled to room temperature. Quenched with saturated  $\text{NaHCO}_3$  solution, the organic phase was separated and the aqueous phase was extracted with ethyl acetate (3×10 mL). The combined organic layers were dried with anhydrous  $\text{Na}_2\text{SO}_4$ , filtered, and concentrated under reduced pressure. Purification by column chromatography on silica get to give the product **S-1** (80% yield).
- c)** To an oven dried 2-5 mL microwave vial was added boronic ester/acid (0.25 mmol, 1 equiv.), PdXPhosG2 (0.0025 mmol, 0.01 equiv.), 10% Pd/C (0.04 mmol, 0.12 equiv.),  $\text{K}_3\text{PO}_4$  (0.75 mmol, 3 equiv.) and **S-1** (0.25 mmol, 1 equiv.). The vial was capped and purged, then 1,4-dioxane (800  $\mu\text{L}$ ) and water (200  $\mu\text{L}$ ) were added. The reaction mixture was stirred at 80 °C for 4 h, followed by the addition of  $\text{NH}_4\text{HCO}_2$  in MeOH (1.25 M) (158 mg  $\text{NH}_4\text{HCO}_2$  in 2 mL MeOH, 10 eq. 2.5 mmol). After this, the reaction was stirred for 16 h at room temperature. The vial was de-capped, and the reaction mixture was diluted with ethyl acetate, filtered through Celite and rinsed through with further ethyl acetate. The solvent was removed in vacuo and purification by column chromatography on silica get to give the product **S-2** (83% yield).
- d)** To the solution of **S-2** (1.0 equiv.) in DCM TFA (10 equiv.) was added, the mixture stirred at room temperature until **S-2** completely conversion. The solvent was removed under reduced pressure and

dried with PhF for two times. The crude product was resolved in CH<sub>3</sub>CN (0.1 M), K<sub>2</sub>CO<sub>3</sub> (3.0 equiv.), 1-Iodopropane (1.2 equiv.) were added. The reaction mixture was stirred at 70 °C overnight and then cooled to room temperature. H<sub>2</sub>O was added and the organic phase was separated and the aqueous phase was extracted with ethyl acetate (3×10 mL). The combined organic layers were dried with anhydrous Na<sub>2</sub>SO<sub>4</sub>, filtered, and concentrated under reduced pressure. Purification by column chromatography on silica get to give the product **8'** in 86% yield.

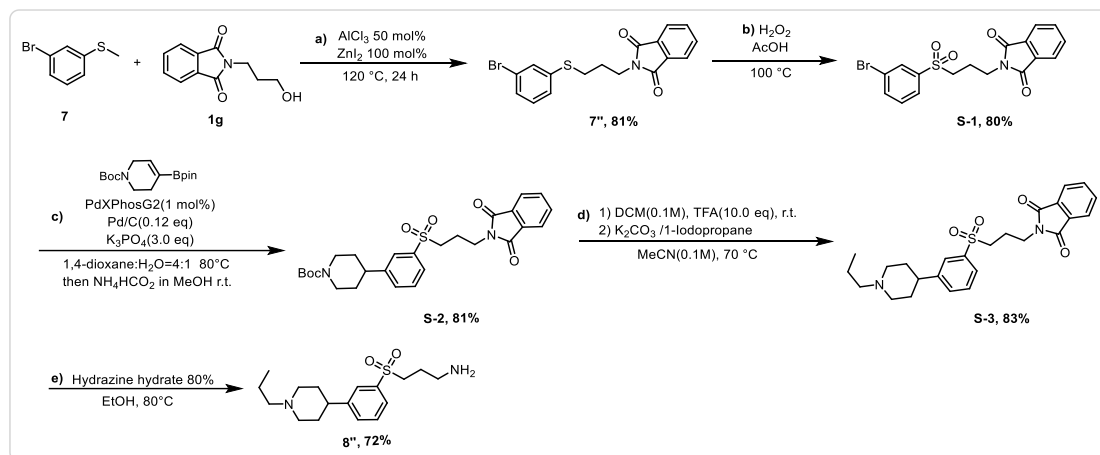

Figure S6: Pridopidine derivatization of **8''**

**e)** **S-3** (0.3 mmol) was dissolved in EtOH (2 mL), hydrazine hydrate (1 mL) was added. The reaction mixture was stirred at 80 °C for 3 hours and then cooled to room temperature. H<sub>2</sub>O was added and the organic phase was separated and the aqueous phase was extracted with ethyl acetate (3×10 mL). The combined organic layers were dried with anhydrous Na<sub>2</sub>SO<sub>4</sub>, filtered, and concentrated under reduced pressure. Purification by column chromatography on silica (DCM/MeOH = 5–10, Et<sub>3</sub>N 1%) to give the product **8''** in 72% yield.

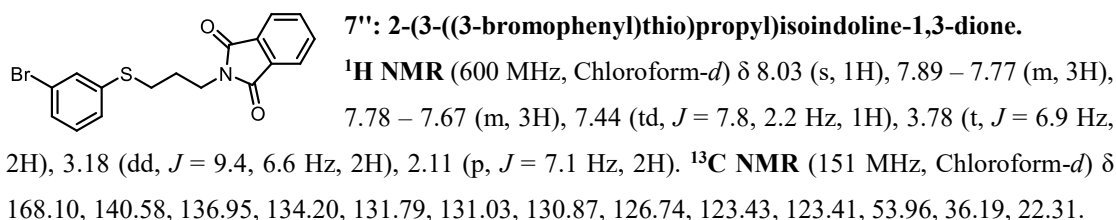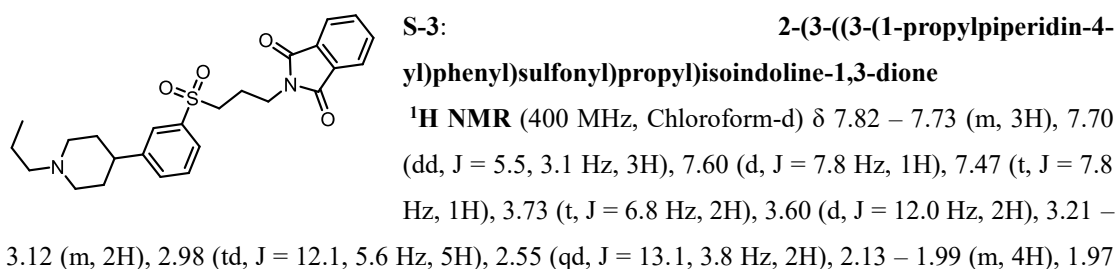

– 1.87 (m, 2H), 0.97 (t,  $J = 7.3$  Hz, 3H).

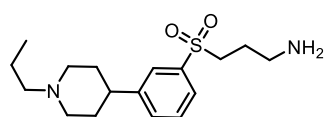

**8'': 3-((3-(1-propylpiperidin-4-yl)phenyl)sulfonyl)propan-1-amine**

**$^1\text{H}$  NMR** (600 MHz, Chloroform- $d$ )  $\delta$  7.77 (s, 1H), 7.73 (d,  $J = 7.7$  Hz, 1H), 7.54 – 7.43 (m, 2H), 3.20 (t,  $J = 7.9$  Hz, 2H), 3.14 (d,  $J = 11.3$  Hz, 2H), 2.93 (br, 2H), 2.83 (d,  $J = 7.2$  Hz, 2H), 2.67 – 2.60 (m, 1H), 2.42 (t,  $J = 8.0$  Hz, 2H), 2.15 (d,  $J = 11.6$  Hz, 2H), 1.93 – 1.87 (m, 6H), 1.62 – 1.55 (m, 2H), 0.92 (t,  $J = 7.5$  Hz, 3H).  **$^{13}\text{C}$  NMR** (151 MHz, Chloroform- $d$ )  $\delta$  147.71, 139.18, 132.14, 129.45, 126.47, 125.83, 60.64, 53.84, 53.78, 42.14, 40.13, 32.72, 25.54, 19.74, 11.90. **HRMS (APCI)**  $m/z$ :  $M+H^+$  calcd for  $\text{C}_{17}\text{H}_{29}\text{O}_2\text{N}_2\text{S}^+$ : 325.1944, found 325.1937.

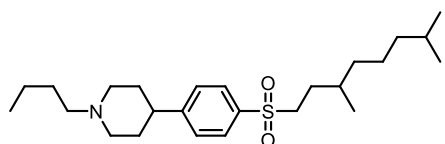

**8': 4-(3-((3,7-dimethyloctyl)sulfonyl)phenyl)-1-propylpiperidine**

**$^1\text{H}$  NMR** (600 MHz, Chloroform- $d$ )  $\delta$  7.67 (s, 1H), 7.63 (d,  $J = 7.8$  Hz, 1H), 7.47 (d,  $J = 7.8$  Hz, 1H), 7.40 (t,  $J = 7.8$  Hz, 1H), 3.24 (d,  $J = 11.7$  Hz, 2H), 3.05 – 2.89 (m, 2H), 2.77 – 2.81 (m, 1H), 2.61 – 2.52 (m, 4H), 2.08 (q,  $J = 12.9$  Hz, 2H), 1.85 (d,  $J = 13.5$  Hz, 2H), 1.65 – 1.59 (m, 3H), 1.46 – 1.33 (m, 3H), 1.14 – 1.05 (m, 3H), 0.99 – 0.95 (m, 3H), 0.83 (t,  $J = 7.5$  Hz, 3H), 0.72 – 0.71 (m, 9H).  **$^{13}\text{C}$  NMR** (151 MHz, Chloroform- $d$ )  $\delta$  146.36, 139.02, 131.82, 129.30, 126.00, 125.75, 77.21, 59.55, 54.02, 52.98, 40.55, 38.65, 36.18, 31.46, 31.11, 28.73, 27.47, 24.56, 24.10, 22.29, 22.19, 18.83, 18.55, 11.31. **RMS (APCI)**  $m/z$ :  $M+H^+$  calcd for  $\text{C}_{24}\text{H}_{42}\text{O}_2\text{NS}^+$ : 408.2931, found 408.2927.

## 6 Mechanistic experiments

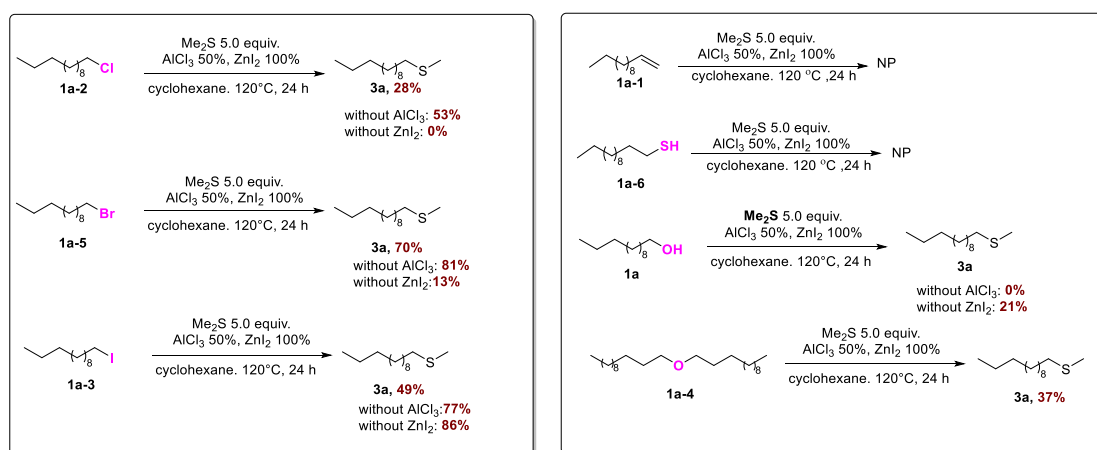

Figure S7: Control experiments I

**1a-2, 1a-5, 1a-3** were reacted without  $\text{AlCl}_3$  respectively, without  $\text{ZnI}_2$  respectively and reacted under standard conditions respectively, the corresponding yield was measured by gas chromatography. **1a-1, 1a-6, 1a, 1a-4** were reacted under standard conditions respectively and the corresponding yield



was measured by gas chromatography.

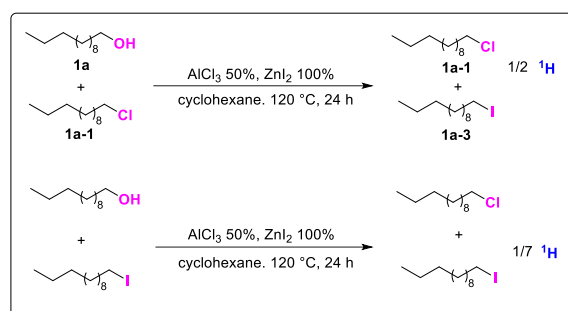

Figure S8: Control experiments II

**1a** and **1a-1** were added in equal proportion to react under standard conditions and the proportion of products was detected by NMR. **1a** and **1a-3** were added in equal proportion to react under standard conditions and the proportion of products was detected by NMR.

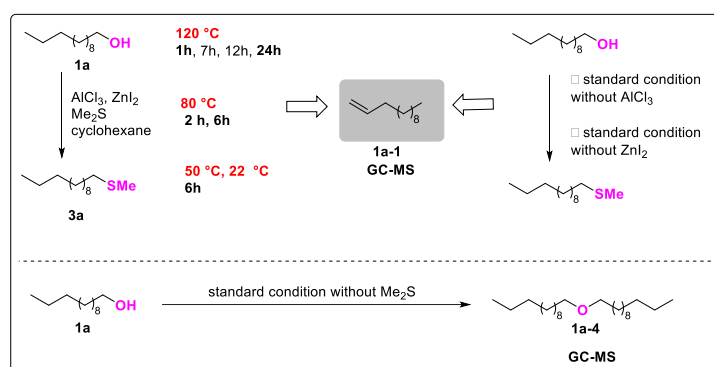

Figure S9: analysis of the reaction mixture with GC-MS

Under standard conditions, only olefins **1a-1** were detected by GC-MS at different reaction temperatures and reaction times. Under standard conditions, GC-MS detection of **1a** without  $\text{AlCl}_3$  or  $\text{ZnI}_2$  also only found **1a-1**. **1a** reacted without  $\text{Me}_2\text{S}$ , trace **1a-4** was detected.

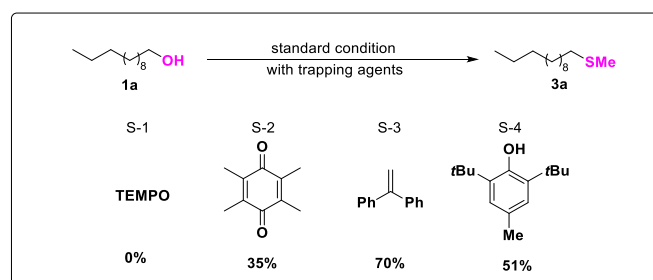

Figure S10: radical trap experiments

To a 10 mL Schlenk tube was added  $\text{AlCl}_3$  (0.1 mmol, 13.35 mg),  $\text{ZnI}_2$  (0.2 mmol, 63.89 mg), substrate **1a** (0.2 mmol, 45  $\mu\text{L}$ ), TEMPO (0.2 mmol, 31.69 mg) and cyclohexane (1.0 ml). The reaction mixture was stirred at 120 °C for 24 hours. Then the reaction was cooled to room temperature, and the solvent was removed under reduced pressure. There is no reaction measured by NMR.

To a 10 mL Schlenk tube was added  $\text{AlCl}_3$  (0.1 mmol, 13.46 mg),  $\text{ZnI}_2$  (0.2 mmol, 63.76 mg), substrate **1a** (0.2 mmol, 45  $\mu\text{L}$ ), **S-2** (0.2 mmol, 32.84 mg) and cyclohexane (1.0 ml). The reaction mixture was stirred at 120  $^\circ\text{C}$  for 24 hours. Then the reaction was cooled to room temperature, and the solvent was removed under reduced pressure. The yield of **3a** is 35% measured by NMR.

To a 10 mL Schlenk tube was added  $\text{AlCl}_3$  (0.1 mmol, 13.51 mg),  $\text{ZnI}_2$  (0.2 mmol, 63.52 mg), substrate **1a** (0.2 mmol, 45  $\mu\text{L}$ ), **S-3** (0.2 mmol, 35  $\mu\text{L}$ ) and cyclohexane (1.0 ml). The reaction mixture was stirred at 120  $^\circ\text{C}$  for 24 hours. Then the reaction was cooled to room temperature, and the solvent was removed under reduced pressure. The yield of **3a** is 70% measured by NMR.

To a 10 mL Schlenk tube was added  $\text{AlCl}_3$  (0.1 mmol, 13.35 mg),  $\text{ZnI}_2$  (0.2 mmol, 63.84 mg), substrate **1a** (0.2 mmol, 45  $\mu\text{L}$ ), **S-4** (0.2 mmol, 44.15 mg) and cyclohexane (1.0 ml). The reaction mixture was stirred at 120  $^\circ\text{C}$  for 24 hours. Then the reaction was cooled to room temperature, and the solvent was removed under reduced pressure. The yield of **3a** is 51% measured by NMR.

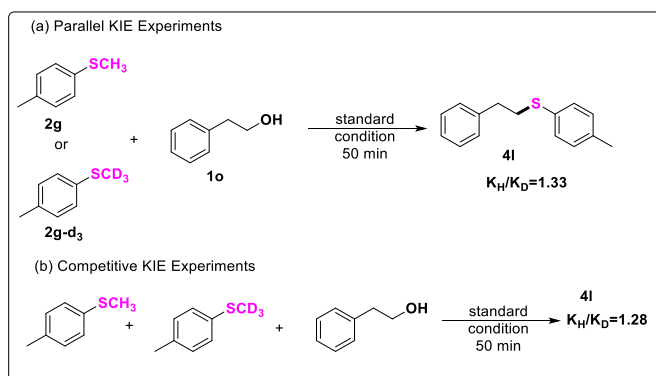

Figure S11: Kinetic isotope effect (KIE) experiments

Parallel Kinetic isotope effect (KIE) experiments: **2g** and **2g-d<sub>3</sub>** reacted with **1o** under standard conditions respectively, and then cooled to room temperature after reaction for 50 minutes. Isotrimethoxybenzene as the internal standard, the yield of **4l** was measured by NMR and calculated the KIE.

Competitive Kinetic isotope effect (KIE) experiments: **2g**, **2g-d<sub>3</sub>** and **1o** were added in equal proportion to react for 50 minutes and then cooled to room temperature. Isotrimethoxybenzene as the internal standard, the residual amounts of **2g** and **2g-d<sub>3</sub>** were detected by NMR, and the conversion amounts of **2g** and **2g-d<sub>3</sub>** were calculated, then calculated the KIE.

## 7 DFT calculations

Density functional calculations were performed using the B3LYP hybrid functional with D3 dispersion corrections (BJ damping)<sup>[30,31]</sup> as implemented in the Gaussian 16 program.<sup>[32]</sup> Geometries were optimized using the def2-SVP basis sets, and analytic frequency calculations were carried out at the same level of theory as the geometry optimizations. The final energies in the toluene solvent were obtained by single-point calculations employing the SMD<sup>[33]</sup> continuum solvation model and the larger def2-TZVPP basis sets. The energies reported are Gibbs free energies, which include zero-point vibrational corrections, thermal and entropy corrections at 298.15 K and solvation energies.

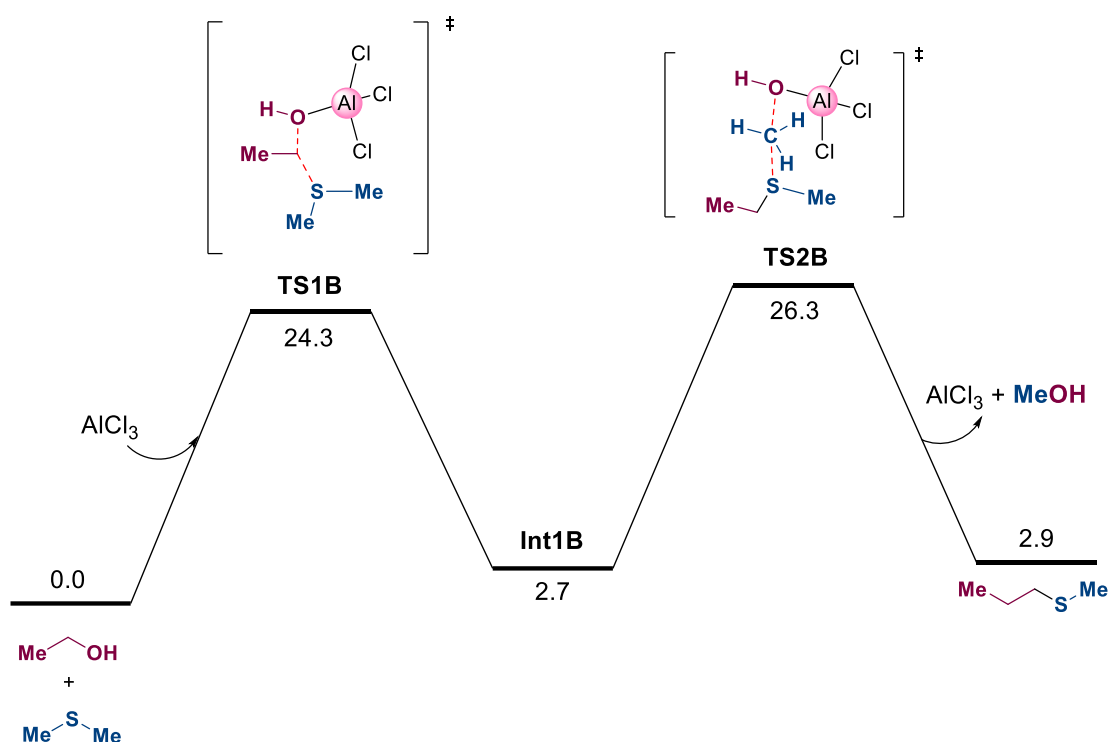

Figure S12: Gibbs free energy profile (in kcal/mol) for the C-O/C-S  $\sigma$ -bond metathesis of ethyl alcohol with dimethyl sulfide catalyzed by  $\text{AlCl}_3$  at the SMD-B3LYP-D3BJ/def2-TZVPP//B3LYP-D3BJ/def2-SVP level.

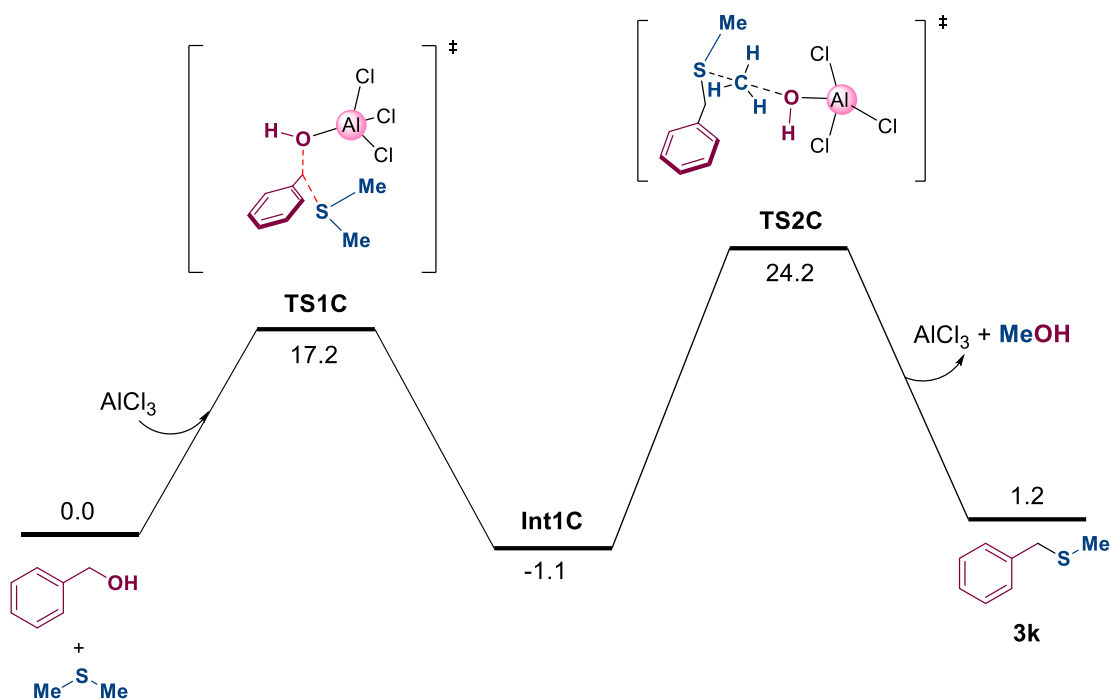

Figure S13: Gibbs free energy profile (in kcal/mol) for the C-O/C-S  $\sigma$ -bond metathesis of benzyl alcohol with dimethyl sulfide catalyzed by  $\text{AlCl}_3$  at the SMD-B3LYP-D3BJ/def2-TZVPP//B3LYP-D3BJ/def2-SVP level.

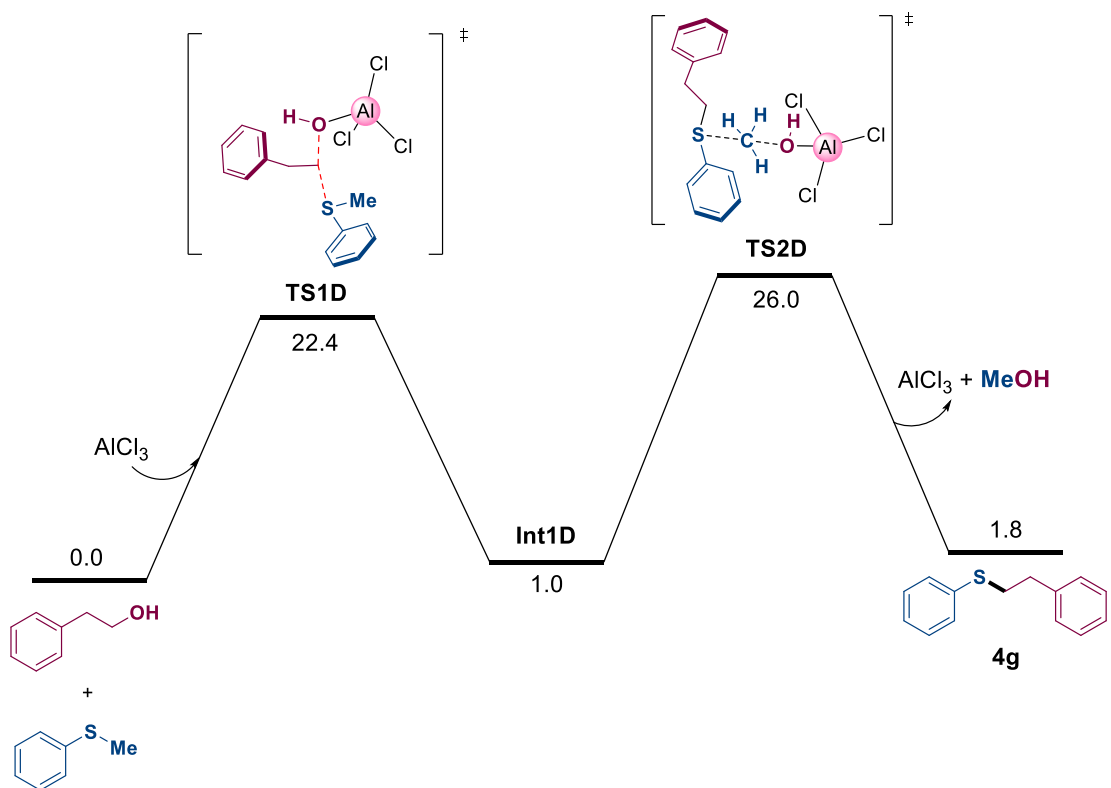

Figure S14: Gibbs free energy profile (in kcal/mol) for the C-O/C-S  $\sigma$ -bond metathesis of phenethyl alcohol with thioanisole catalyzed by  $\text{AlCl}_3$  at the SMD-B3LYP-D3BJ/def2-TZVPP//B3LYP-D3BJ/def2-SVP level.

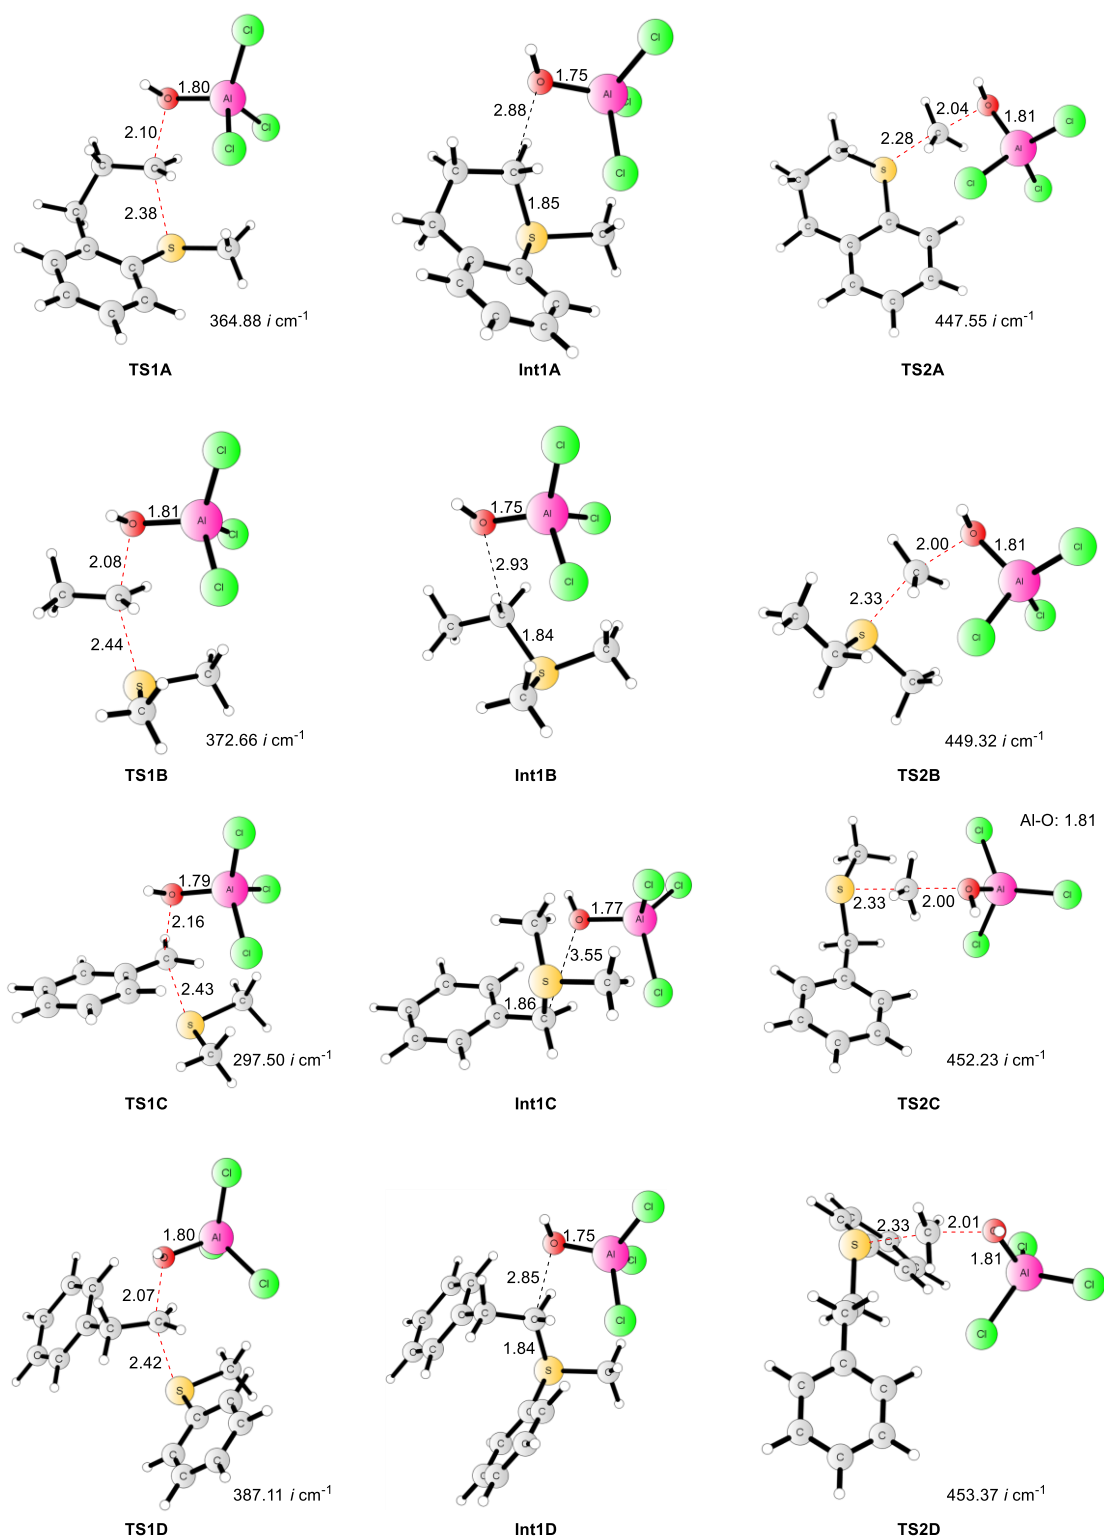

Figure S15: Optimized geometries of the critical intermediates and transition states. All distances are given in Å.

Table S3 Calculated energies (in Hartree) for all stationary points

| Stationary point                                                                                          | Thermal correction to Gibbs<br>free energy | Single-point energy (SMD)-<br>B3LYP-D3BJ/def2-TZVPP |
|-----------------------------------------------------------------------------------------------------------|--------------------------------------------|-----------------------------------------------------|
| <b>5a</b>                                                                                                 | 0.17975                                    | -863.18468                                          |
| <b>6a</b>                                                                                                 | 0.13281                                    | -747.39035                                          |
| CH <sub>3</sub> OH                                                                                        | 0.02831                                    | -115.78387                                          |
| AlCl <sub>3</sub> - <b>5a</b>                                                                             | 0.17866                                    | -2486.62475                                         |
| TS1A                                                                                                      | 0.17566                                    | -2486.58541                                         |
| Int1A                                                                                                     | 0.17485                                    | -2486.61482                                         |
| TS2A                                                                                                      | 0.17505                                    | -2486.58159                                         |
| CH <sub>3</sub> CH <sub>2</sub> OH                                                                        | 0.05429                                    | -155.12402                                          |
| AlCl <sub>3</sub> -CH <sub>3</sub> CH <sub>2</sub> OH                                                     | 0.04837                                    | -1778.55518                                         |
| CH <sub>3</sub> SCH <sub>3</sub>                                                                          | 0.04810                                    | -478.09456                                          |
| CH <sub>3</sub> CH <sub>2</sub> SCH <sub>3</sub>                                                          | 0.07427                                    | -517.43033                                          |
| TS1B                                                                                                      | 0.11579                                    | -2256.62624                                         |
| Int1B                                                                                                     | 0.11858                                    | -2256.66350                                         |
| TS2B                                                                                                      | 0.11667                                    | -2256.62397                                         |
| C <sub>6</sub> H <sub>5</sub> CH <sub>2</sub> OH                                                          | 0.10041                                    | -346.95118                                          |
| AlCl <sub>3</sub> -C <sub>6</sub> H <sub>5</sub> CH <sub>2</sub> OH                                       | 0.09715                                    | -1970.38364                                         |
| <b>3k</b> (C <sub>6</sub> H <sub>5</sub> CH <sub>2</sub> SCH <sub>3</sub> )                               | 0.12113                                    | -709.26082                                          |
| TS1C                                                                                                      | 0.16413                                    | -2448.46658                                         |
| Int1C                                                                                                     | 0.16646                                    | -2448.49814                                         |
| TS2C                                                                                                      | 0.16450                                    | -2448.45582                                         |
| C <sub>6</sub> H <sub>5</sub> CH <sub>2</sub> CH <sub>2</sub> OH                                          | 0.12810                                    | -386.28789                                          |
| AlCl <sub>3</sub> -C <sub>6</sub> H <sub>5</sub> CH <sub>2</sub> CH <sub>2</sub> OH                       | 0.12520                                    | -2009.71955                                         |
| C <sub>6</sub> H <sub>5</sub> SCH <sub>3</sub>                                                            | 0.09660                                    | -669.92657                                          |
| <b>4g</b> (C <sub>6</sub> H <sub>5</sub> CH <sub>2</sub> CH <sub>2</sub> SC <sub>6</sub> H <sub>5</sub> ) | 0.19592                                    | -940.42733                                          |
| TS1D                                                                                                      | 0.23838                                    | -2679.62404                                         |
| Int1D                                                                                                     | 0.24035                                    | -2679.66011                                         |
| TS2D                                                                                                      | 0.24045                                    | -2679.62034                                         |

## 8 References

1. C. Ruzic, J. Karpinska, A. R. Kennedy & Y. H. Geerts. Synthesis of 1,6-, 2,7-, 3,8-, and 4,9-Isomers of Didodecyl[1]benzothieno[3,2-b][1]benzothiophenes. *J. Org. Chem.*, **2013**, 78, 7741-7748
2. E. Santaniello, P. Ferraboschi, & P. Sozzani. Reduction of Esters to Alcohols by means of Sodium Borohydride in Polyethylene Glycols. *J. Org. Chem.*, **1981**, 46, 4585-4586
3. R. N. Salvatore, R. A. Smith, A. K. Nischwitz & T. Gavin. A mild and highly convenient chemoselective alkylation of thiols using Cs<sub>2</sub>CO<sub>3</sub>-TBAI. *Tetrahedron Lett.*, **2005**, 46, 8931-8935
4. S. N. Alektiar, J. Han, Y. Dang, C. Z. Rubel & Z. K. Wickens. Radical Hydrocarboxylation of Unactivated Alkenes via Photocatalytic Formate Activation. *J. Am. Chem. Soc.*, **2023**, 145, 20, 10991-10997
5. S. K. Kristensen, S. L. R. Laursen, E. Taarning & T. Skrydstrup. Ex Situ Formation of Methanethiol: Application in the Gold(I)-Promoted Anti-Markovnikov Hydrothiolation of Olefins. *Angew. Chem. Int. Ed.*, **2018**, 57, 13887-13891
6. N. Iranpoor, H. Firouzabadi & H. R. Shaterian. A New Approach to the Reduction of Sulfoxides to Sulfides with 1,3-Dithiane in the Presence of Electrophilic Bromine as Catalyst. *J. Org. Chem.*, **2002**, 67, 2826-2830
7. M. Frings, C. Bolm, A. Blum & C. Gnam. Sulfoximines from a Medicinal Chemist's Perspective: Physicochemical and in vitro Parameters Relevant for Drug Discovery. *Eur. J Med. Chem.*, **2017**, 126, 225-245
8. M. Mannini, L. Sorace, L. Gorini, F. M. Piras, A. Caneschi & A. Magnani et al. Self-Assembled Organic Radicals on Au(III) Surfaces: A Combined ToF-SIMS, STM, and ESR Study. *Langmuir*, **2007**, 23, 2389-2397
9. G. A. Olah, Q. Wang & G. Neyer. Superelectrophilic Methylthiomethylation of Aromatics with Chloromethyl Methyl Sulfide/Aluminum Chloride (MeSCH<sub>2</sub>Cl:2AlCl<sub>3</sub>) Reagent. *Synthesis*, **1994**, 3, 276-278
10. K. Townsend, M. P. Huestis & J. C. Tellis. Photoredox/Nickel Dual Catalytic Cross-Coupling of Potassium Thiomethyltrifluoroborates with Aryl and Heteroaryl Bromides. *J. Org. Chem.*, **2021**, 86, 6937-6942
11. S. Chen, J. Wang & L.-G. Xie. Transition metal-free formal hydro/deuteromethylthiolation of

- unactivated alkenes. *Org. Biomol. Chem.*, **2021**, 19, 4037–4042
12. Q. Tian, L. Wang & Y. Li. Copper-Catalyzed direct thioetherification of Alkyl Halides with S-Alkyl Butanethioate as Thiol transfer reagent. *J. Sulfur Chem.*, **2022**, 43, 1-11
  13. T. D. Franco, N. Boutin & X. Hu. Suzuki–Miyaura Cross-Coupling Reactions of Unactivated Alkyl Halides Catalyzed by a Nickel Pincer Complex. *Synthesis*, **2013**, 45, 2949–2958
  14. Rostami, A. Rostami & A. Ghaderi. Copper-Catalyzed Thioetherification Reactions of Alkyl Halides, Triphenyltin Chloride, and Arylboronic Acids with Nitroarenes in the Presence of Sulfur Sources. *J. Org. Chem.*, **2015**, 80, 8694-8704
  15. T. Zheng, J. Tan, R. Fan, S. Su, B. Liu, C. Tan & K. Xu. Diverse ring opening of thietanes and other cyclic sulfides: an electrophilic aryne activation approach. *Chem. Commun.*, **2018**, 54, 1303-1306
  16. T. Tamai, K. Fujiwara, S. Higashimae, A. Nomoto & A. Ogawa. Gold-Catalyzed Anti Markovnikov Selective Hydrothiolation of Unactivated Alkenes. *Org. Lett.*, **2016**, 18, 2114-2117
  17. S. Chun, J. Chung, J. E. Park & Y. K. Chung. Hydrothiolation of Alkenes and Alkynes Catalyzed by 3,4- Dimethyl-5-vinylthiazolium iodide and Poly(3,4-dimethyl- 5-vinylthiazolium) iodid. *ChemCatChem.*, **2016**, 8, 2476 – 2481
  18. M. Xuan, C. Lu & B.-L. Lin. C-S Coupling with Nitro Group as Leaving Group via Simple Inorganic Salt Catalysis. *Chin. Chem. Lett.*, **2020**, 31, 84-90
  19. Z. S. Qureshi, K. M. Deshmukh, K. P. Dhake & B. M. Bhanage. Brønsted acidic ionic liquid: a simple, efficient and recyclable catalyst for regioselective alkylation of phenols and anti-Markovnikov addition of thiols to alkenes. *RSC Advances*, **2011**, 1, 1106–1112
  20. G. Kumar Rao, A. Kumar, F. Saleem, M. P. Singh, S. Kumar & B. Kumar. et al. Palladium(II)-1-phenylthio-2-arylchalcogenoethane complexes: palladium phosphide nano-peanut and ribbon formation controlled by chalcogen and Suzuki coupling activation. *Dalton Trans.*, **2015**, 44, 6600–6612
  21. M. Gholinejad. One-Pot Copper-Catalysed Thioetherification of Aryl Halides Using Alcohols and Lawesson’s Reagent in Diglyme. *Eur. J. Org. Chem.*, **2015**, 4162–4167
  22. Q. Chen, P. Wang, T. Yan & M. Cai. A highly efficient heterogeneous ruthenium(III)-catalyzed reaction of diaryl diselenides with alkyl halides leading to unsymmetrical diorganyl selenides. *J. Organomet.*, **2017**, 840, 38-46



23. K. Sakata, D. Urabe & M. Inoue. Preparation and palladium-mediated cross-coupling of  $\alpha$ -benzoyloxyalkylzinc bromides. *Tetrahedron Lett.*, **2013**, 54, 4189–4192
24. R.-Y. Tang, Z. Zhong & Q.-L. Lin. Reduced Species ( $\text{HSO}_2^-$ ,  $\text{SO}_2^{\cdot-}$ ) Promoted One-Pot Efficient Synthesis of Phenyl Alkyl Selenides. *Chin. J. Chem.*, **2007**, 25, 558-561
25. T. Delcaillau, A. Bismuto, Z. Lian & B. Morandi. Nickel-Catalyzed Inter- and Intramolecular Aryl Thioether Metathesis by Reversible Arylation. *Angew. Chem. Int. Ed.*, **2020**, 59, 2110–2114
26. M. Minakawa, K. Minami & Y. Sato. Direct Access to S-Heterocycles from  $\text{Sc}(\text{OTf})_3$ -Catalyzed Cyclization of Aromatic Thiols with Diols. *Synlett.*, **2021**, 32, 1869-1873
27. Y.-L. Song, X.-M. Liu, N. Yang & G.-L. Yang. Synthesis and Antifungal Activity of Some Thiazole Derivatives. *Chem. Asian J.*, **2013**, 25, 1849-1852
28. P. Gao, Z. Wang, R. Chang, W. Li, Z. Zhao, & D. Fu. Ruthenium/HI-catalyzed direct hydromethylation of indoles and quinolines in DME. *New J. Chem.*, **2024**, 48, 1227–1232
29. H. Liu, Q. Huang, R. Liao, M. Li & Y. Xie. Ring-closing C–O/C–O metathesis of ethers with primary aliphatic alcohols. *Nat. Commun.*, **2023**, 14,1883
30. Becke, A. D. Density-functional thermochemistry. III. The role of exact exchange. *J. Chem. Phys.* **1993**, 98 (7), 5648-5652.
31. 2. Stefan Grimme; Jens Antony; Stephan Ehrlich; Krieg, H. A consistent and accurate ab initio parametrization of density functional dispersion correction (DFT-D) for the 94 elements H-Pu. *J. Chem. Phys.*, **2010**, 132 (15), 154104.
32. 3. Frisch, M. J.; Trucks, G. W.; Schlegel, H. B.; Scuseria, G. E.; Robb, M. A.; Cheeseman, J. R.; Scalmani, G.; Barone, V.; Mennucci, B.; Petersson, G. A.; et al. Wallingford CT. **2016**.
33. 4. Aleksandr V. Marenich; Christopher J. Cramer; Truhlar, D. G. Universal Solvation Model Based on Solute Electron Density and on a Continuum Model of the Solvent Defined by the Bulk Dielectric Constant and Atomic Surface Tensions. *J. Phys. Chem. B*, **2009**, 113, 6378–6396.

## 9 NMR spectroscopic data

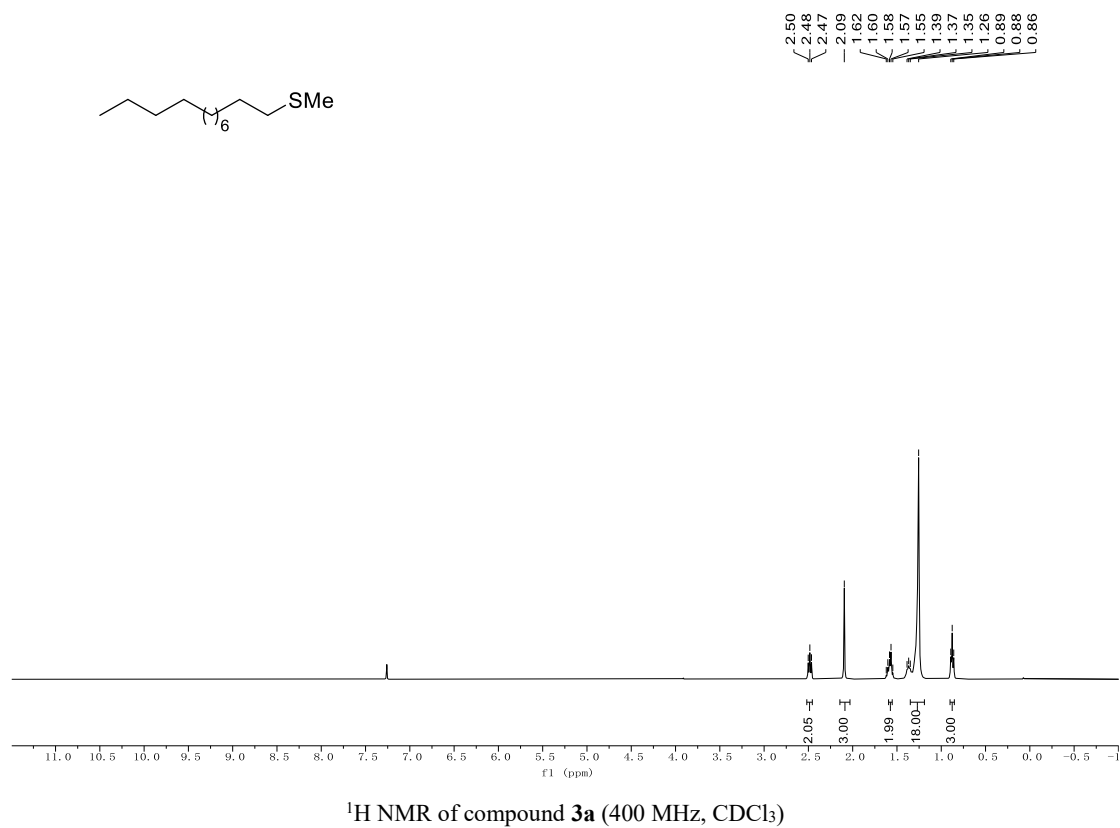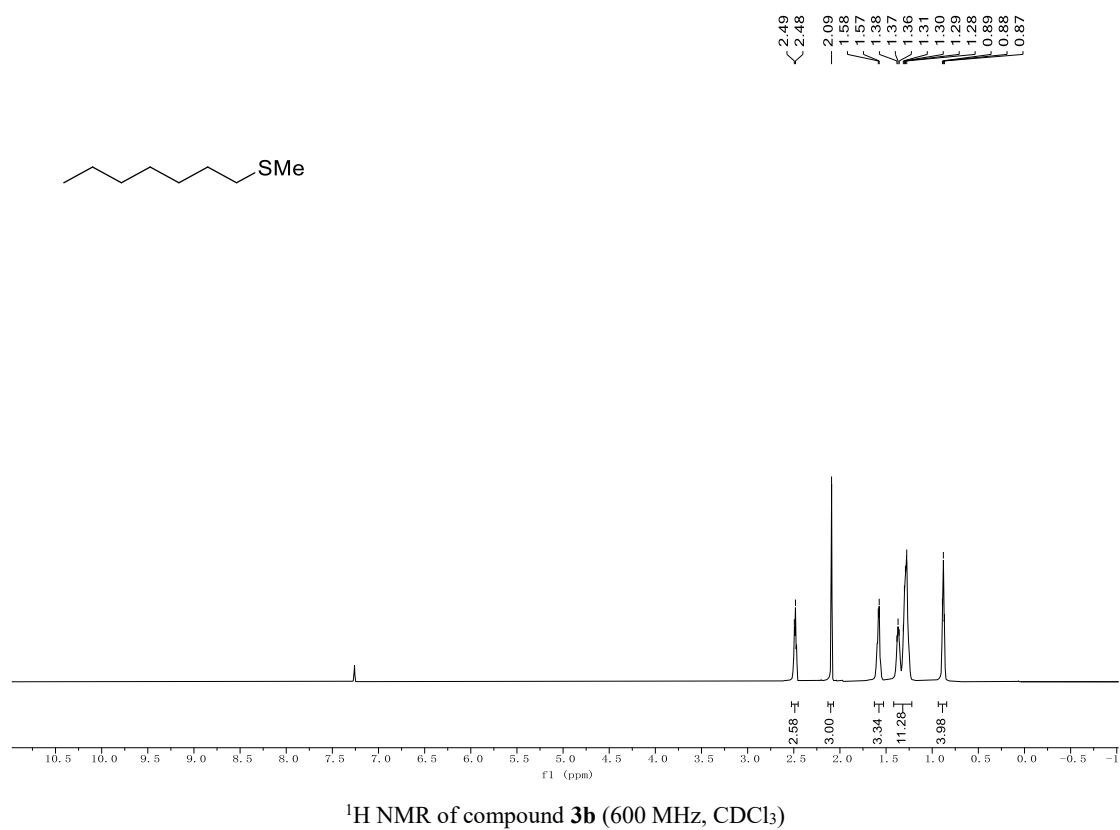

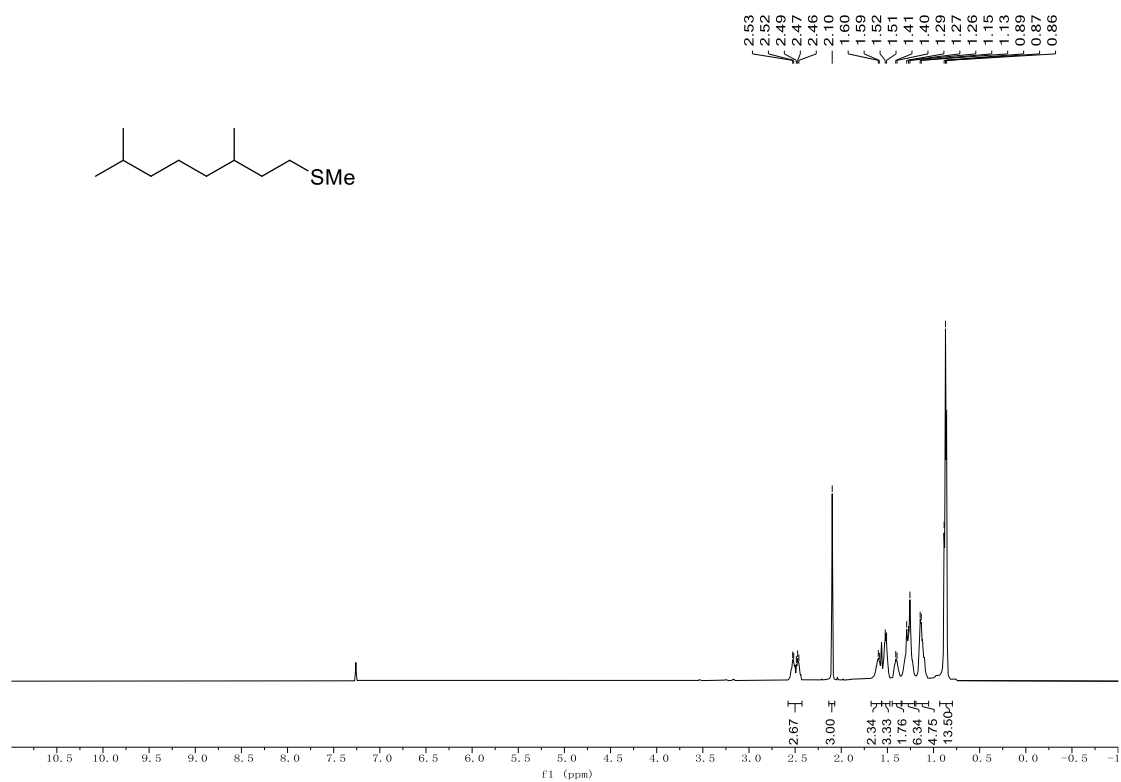

<sup>1</sup>H NMR of compound **3c** (600 MHz, CDCl<sub>3</sub>)

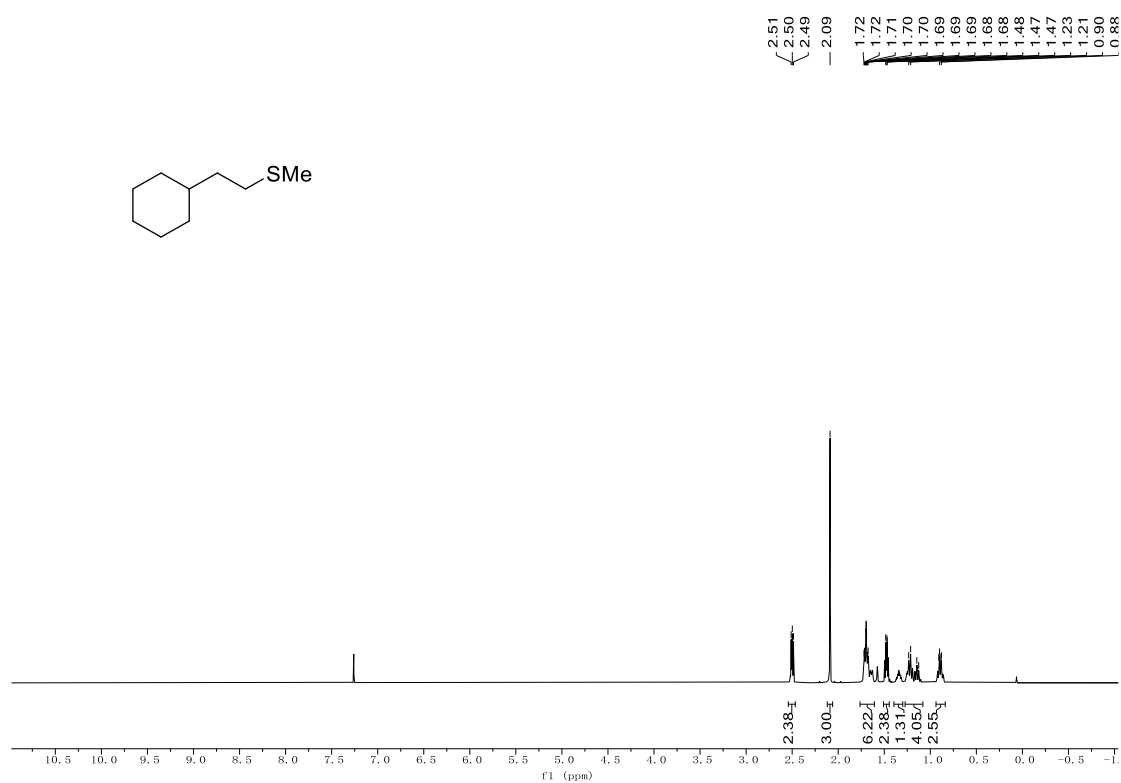

<sup>1</sup>H NMR of compound **3d** (600 MHz, CDCl<sub>3</sub>)

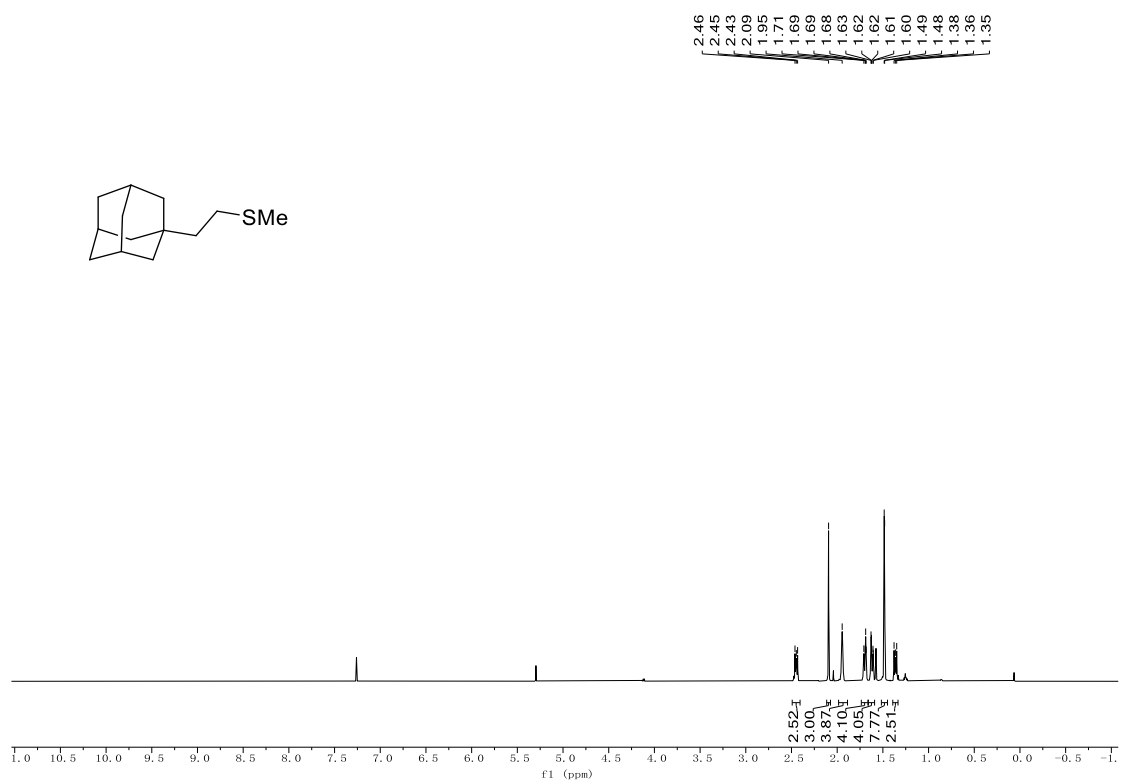

<sup>1</sup>H NMR of compound **3e** (600 MHz, CDCl<sub>3</sub>)

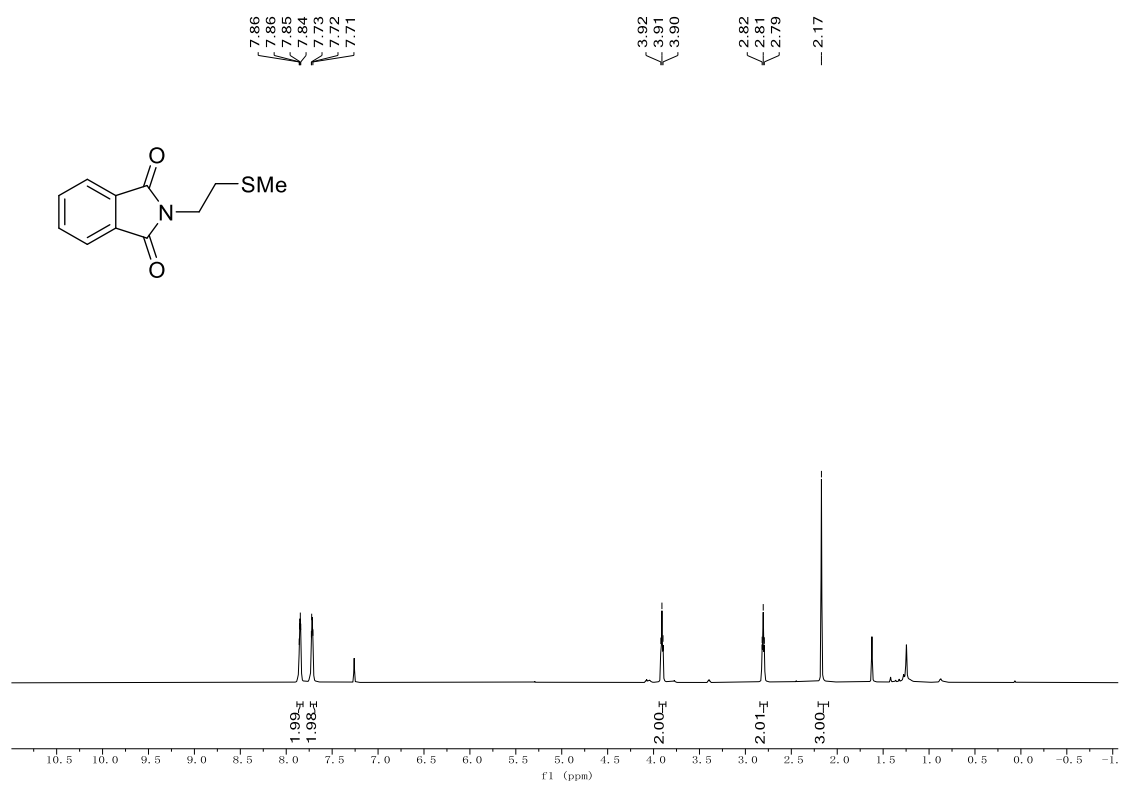

<sup>1</sup>H NMR of compound **3f** (600 MHz, CDCl<sub>3</sub>)

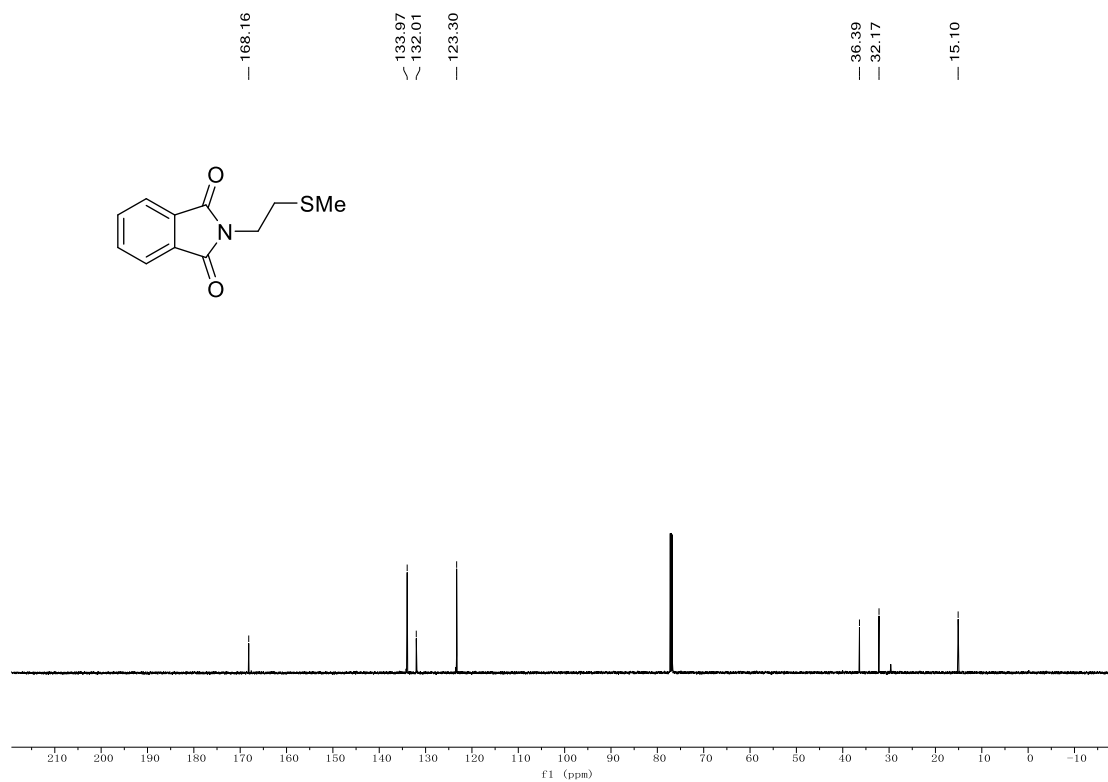

<sup>13</sup>C NMR of compound **3f** (151 MHz, CDCl<sub>3</sub>)

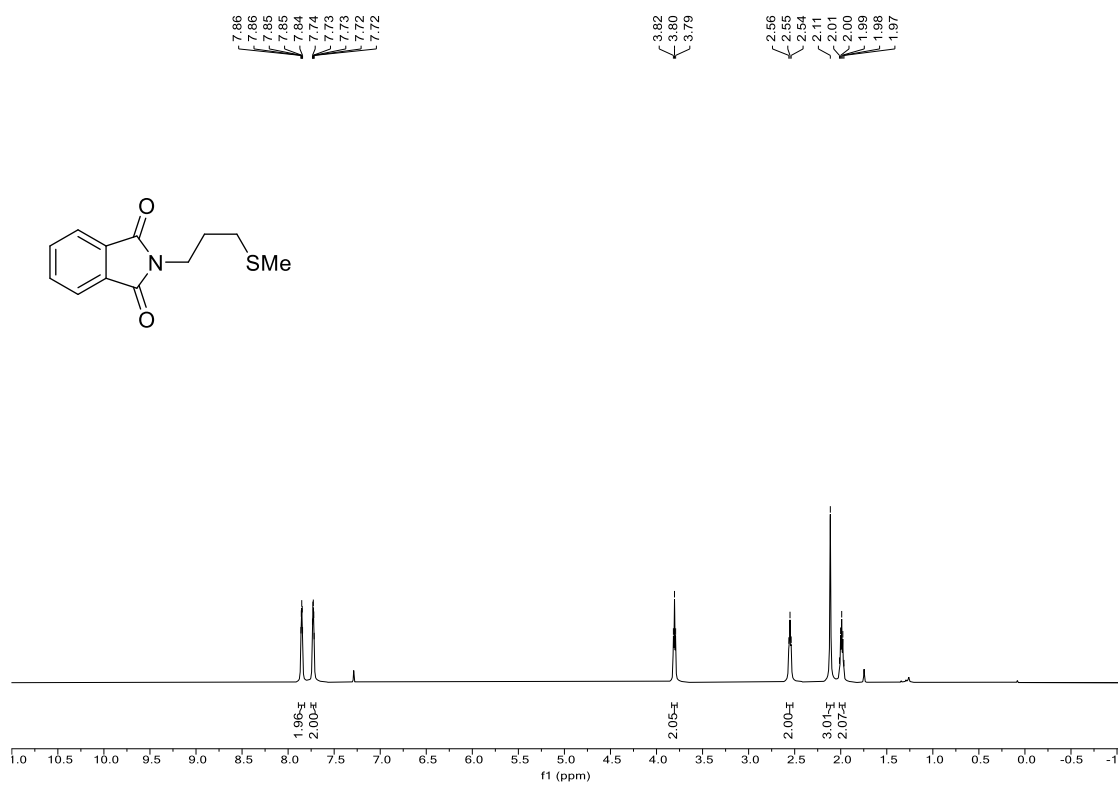

<sup>1</sup>H NMR of compound **3g** (600 MHz, CDCl<sub>3</sub>)

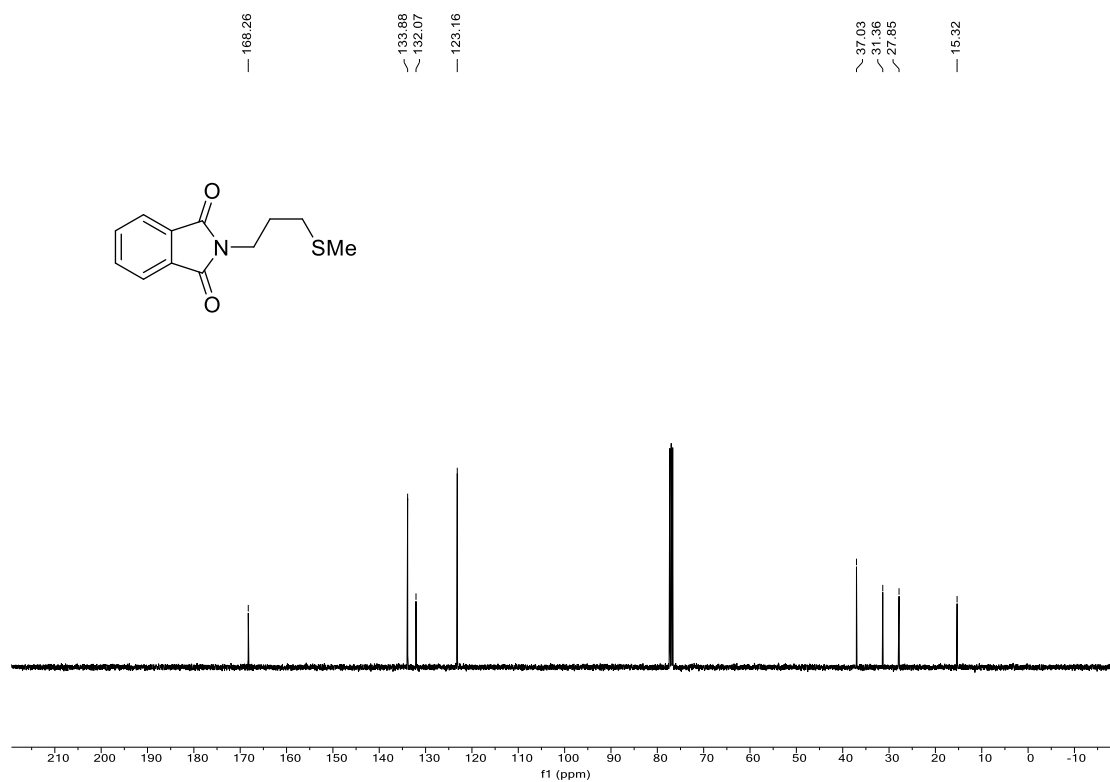

<sup>13</sup>C NMR of compound **3g** (101 MHz, CDCl<sub>3</sub>)

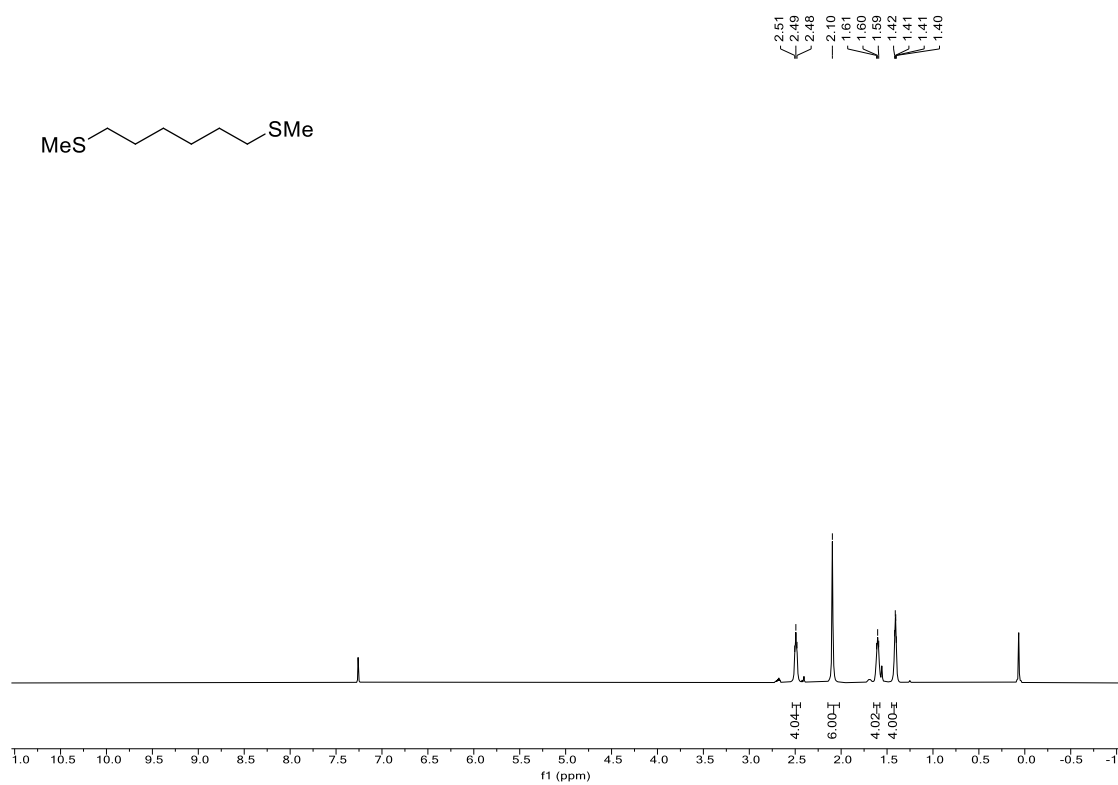

<sup>1</sup>H NMR of compound **3h** (600 MHz, CDCl<sub>3</sub>)

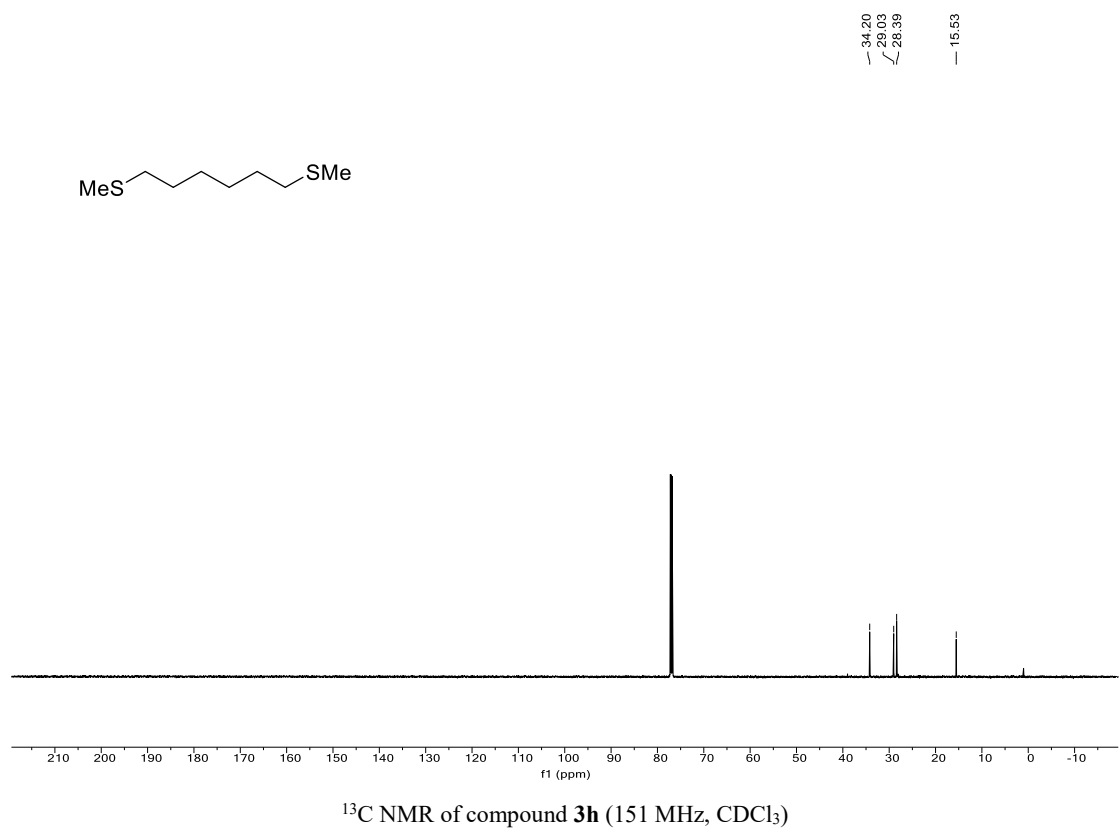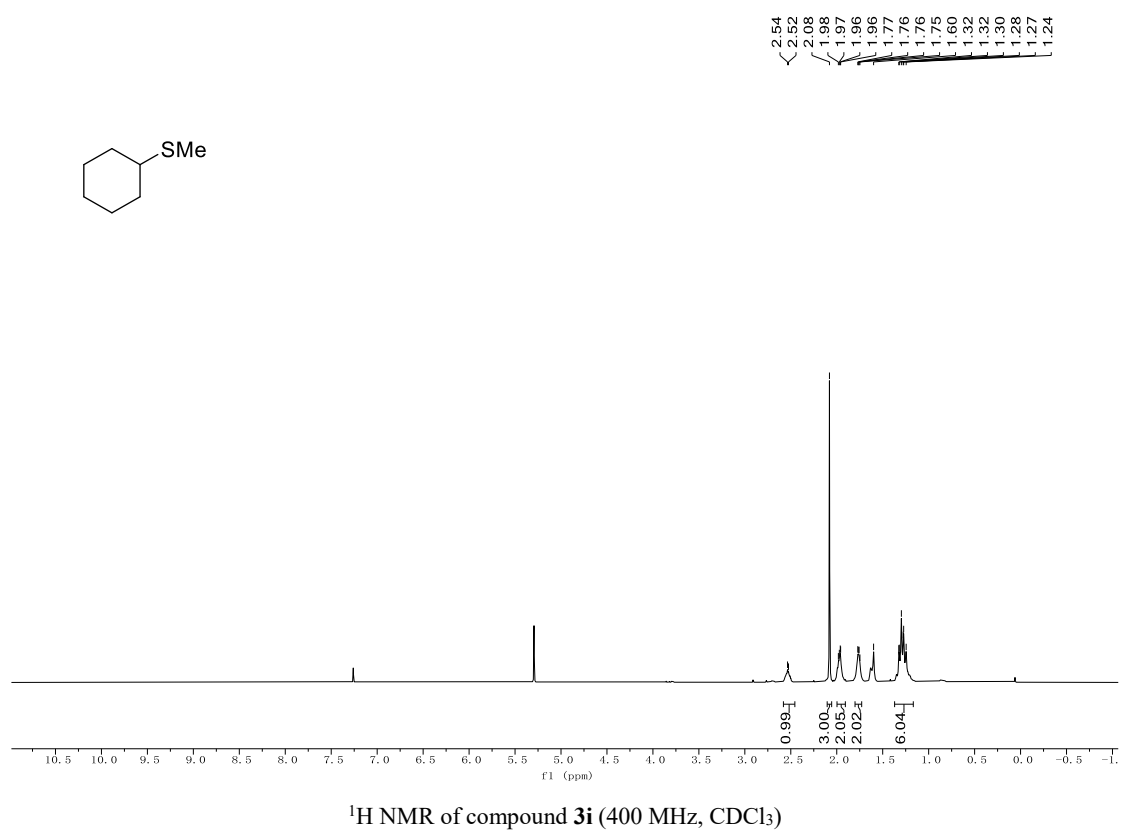

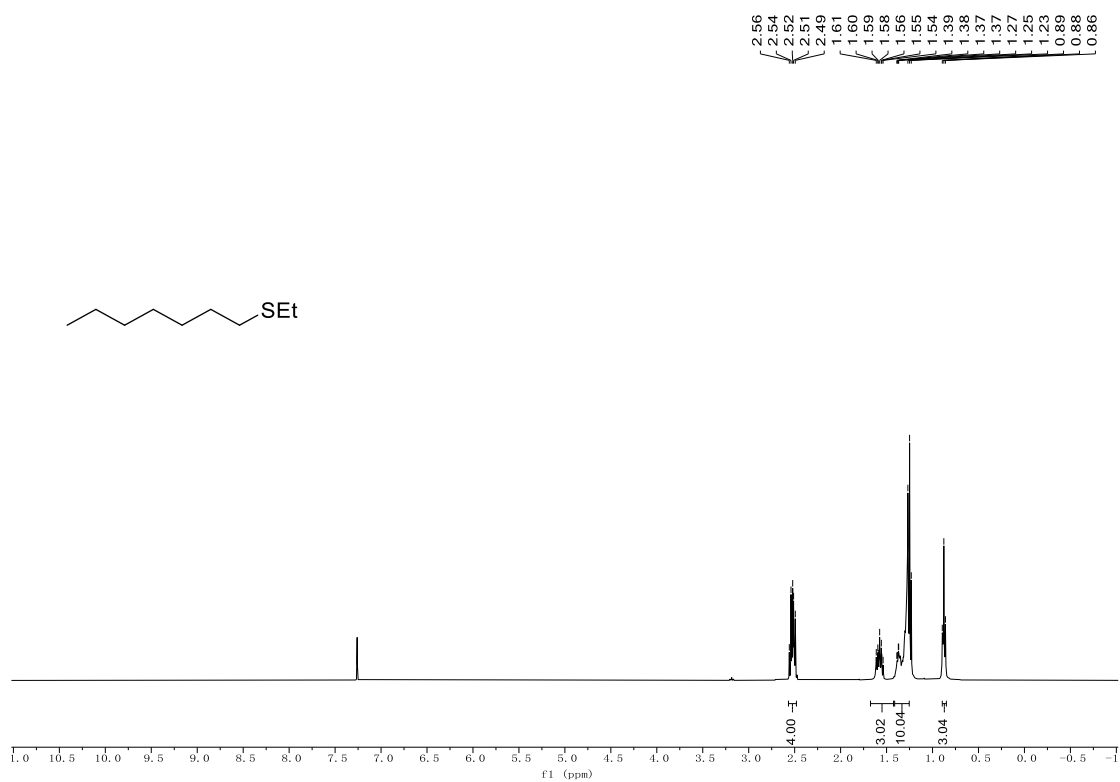

<sup>1</sup>H NMR of compound **3j** (400 MHz, CDCl<sub>3</sub>)

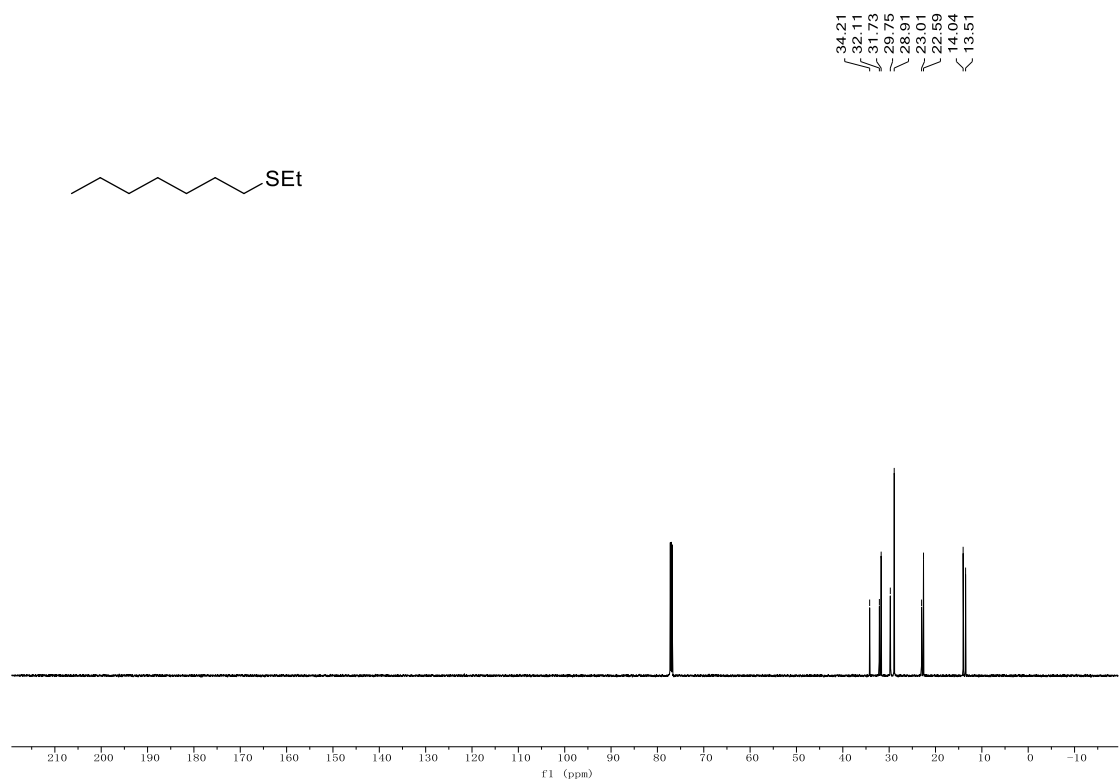

<sup>13</sup>C NMR of compound **3j** (151 MHz, CDCl<sub>3</sub>)



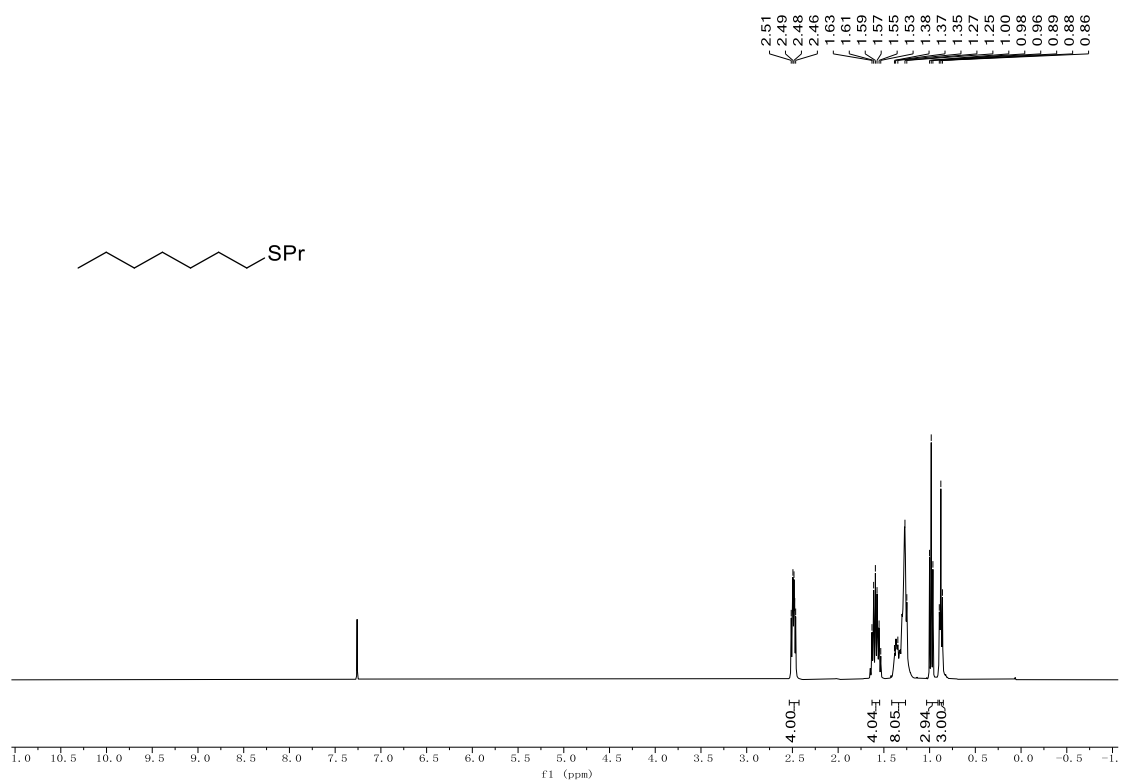

<sup>1</sup>H NMR of compound **3k** (400 MHz, CDCl<sub>3</sub>)

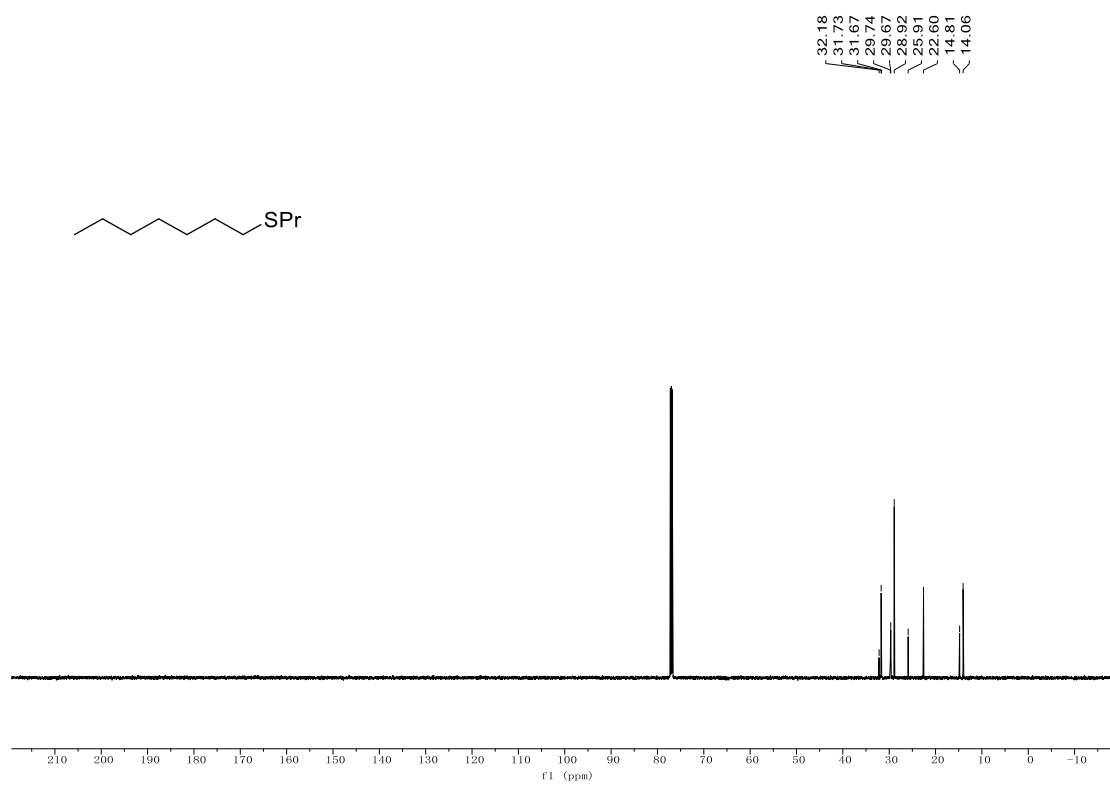

<sup>13</sup>C NMR of compound **3k** (151 MHz, CDCl<sub>3</sub>)

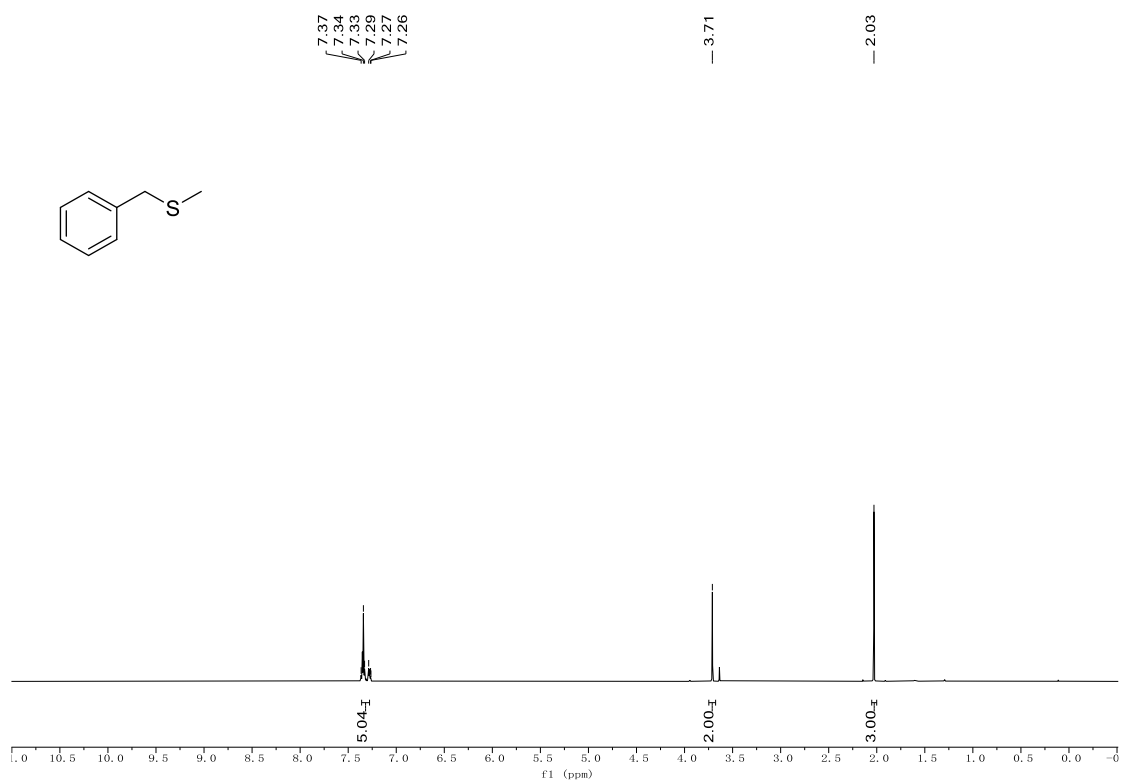

<sup>1</sup>H NMR of compound **3l** (600 MHz, CDCl<sub>3</sub>)

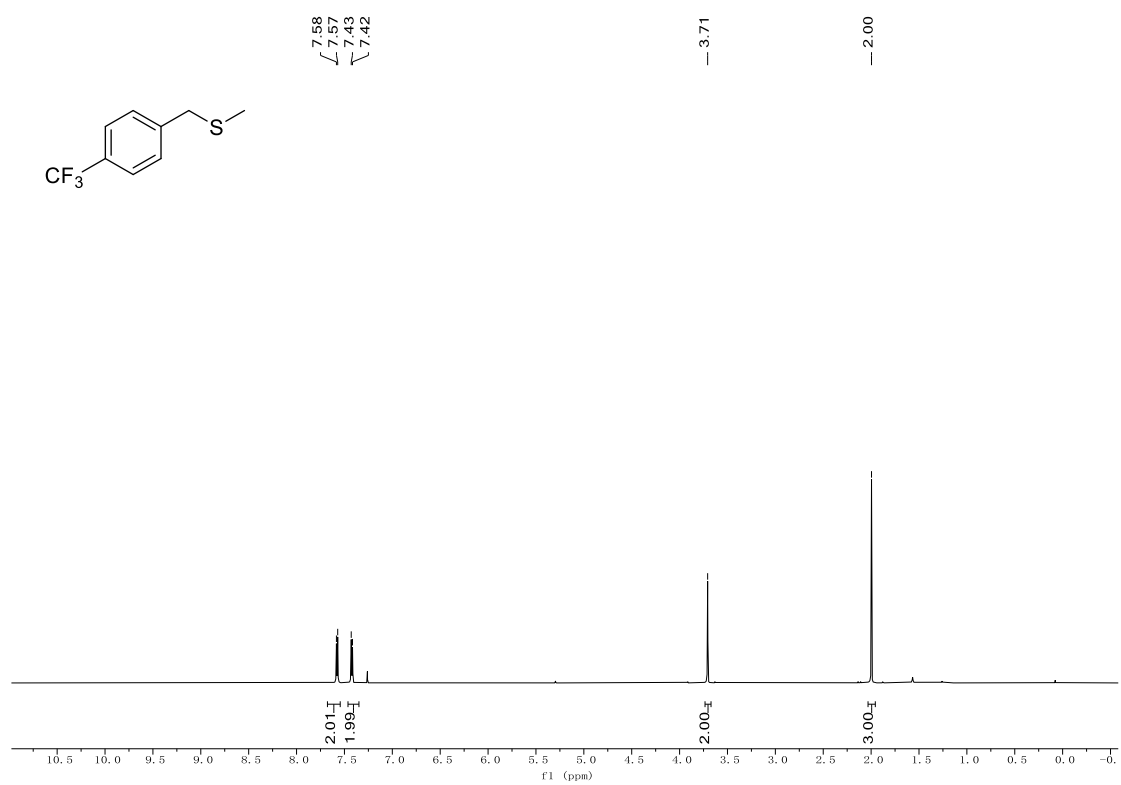

<sup>1</sup>H NMR of compound **3m** (600 MHz, CDCl<sub>3</sub>)

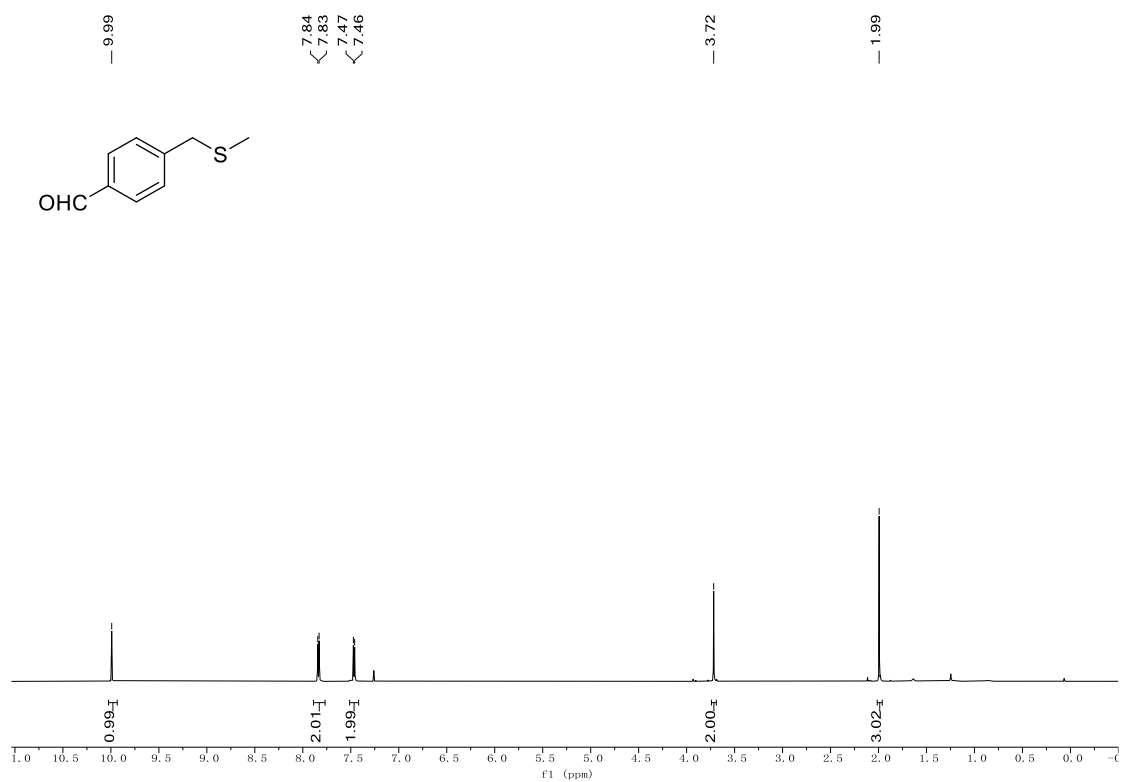

<sup>1</sup>H NMR of compound **3n** (600 MHz, CDCl<sub>3</sub>)

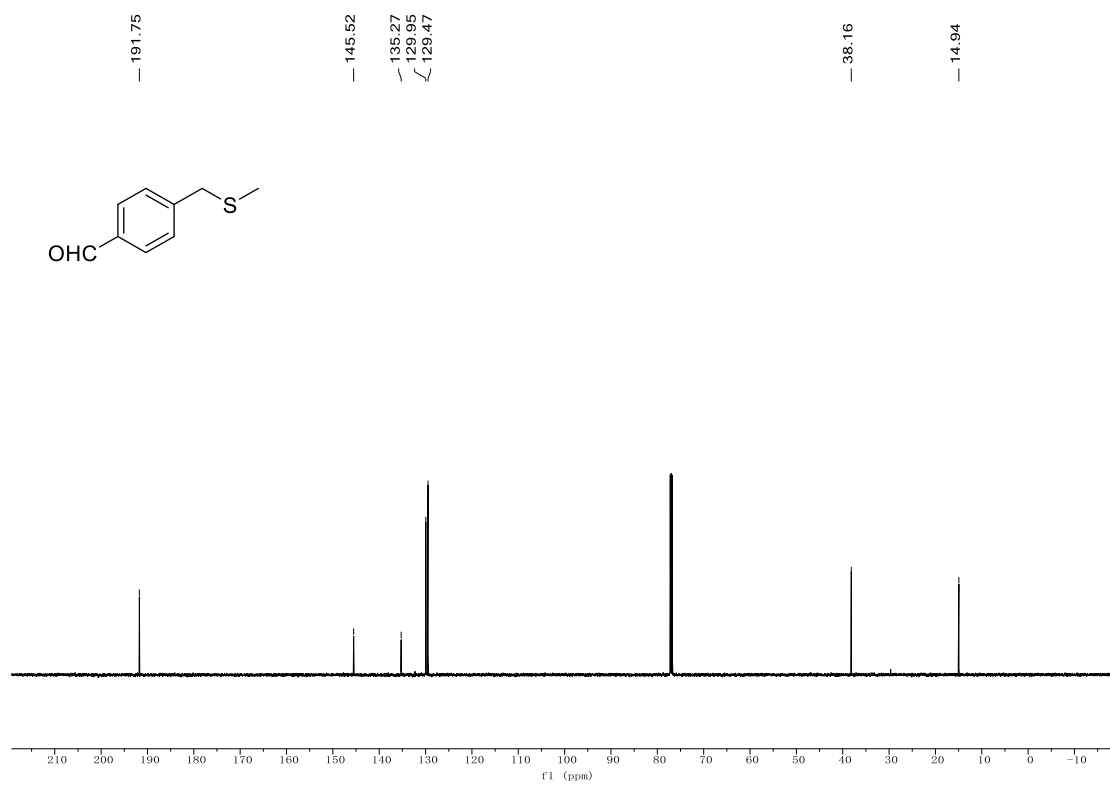

<sup>13</sup>C NMR of compound **3n** (151 MHz, CDCl<sub>3</sub>)

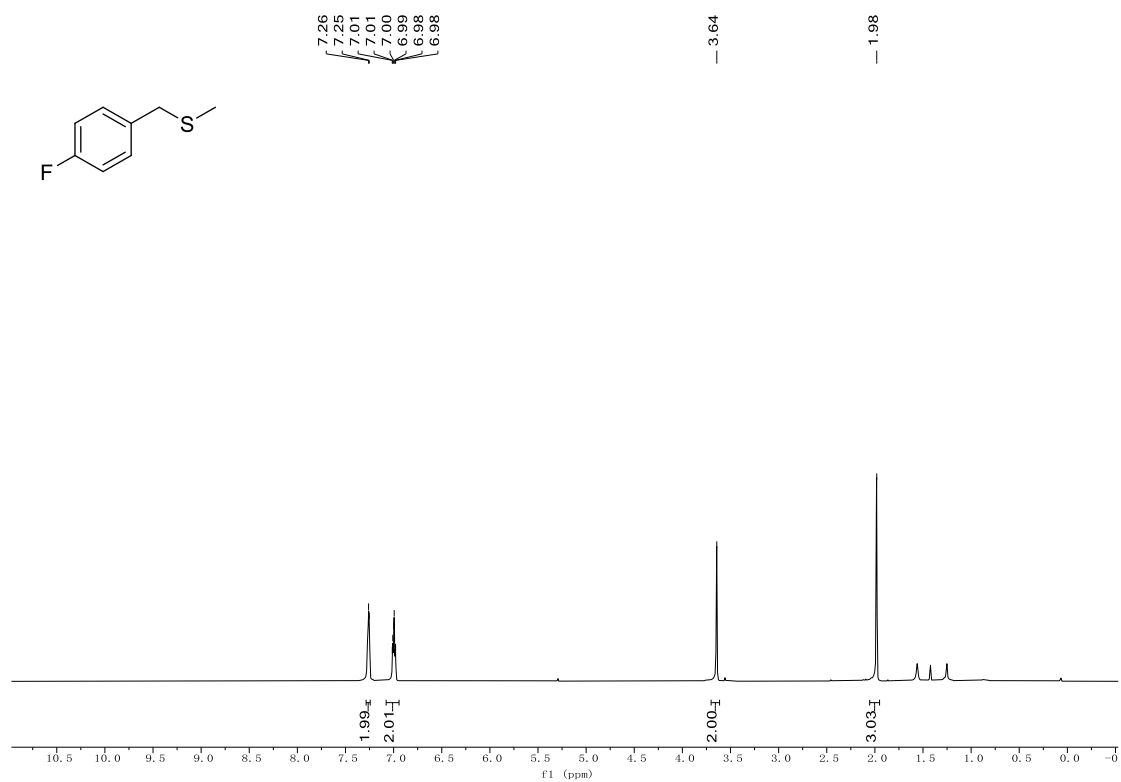

<sup>1</sup>H NMR of compound **3o** (600 MHz, CDCl<sub>3</sub>)

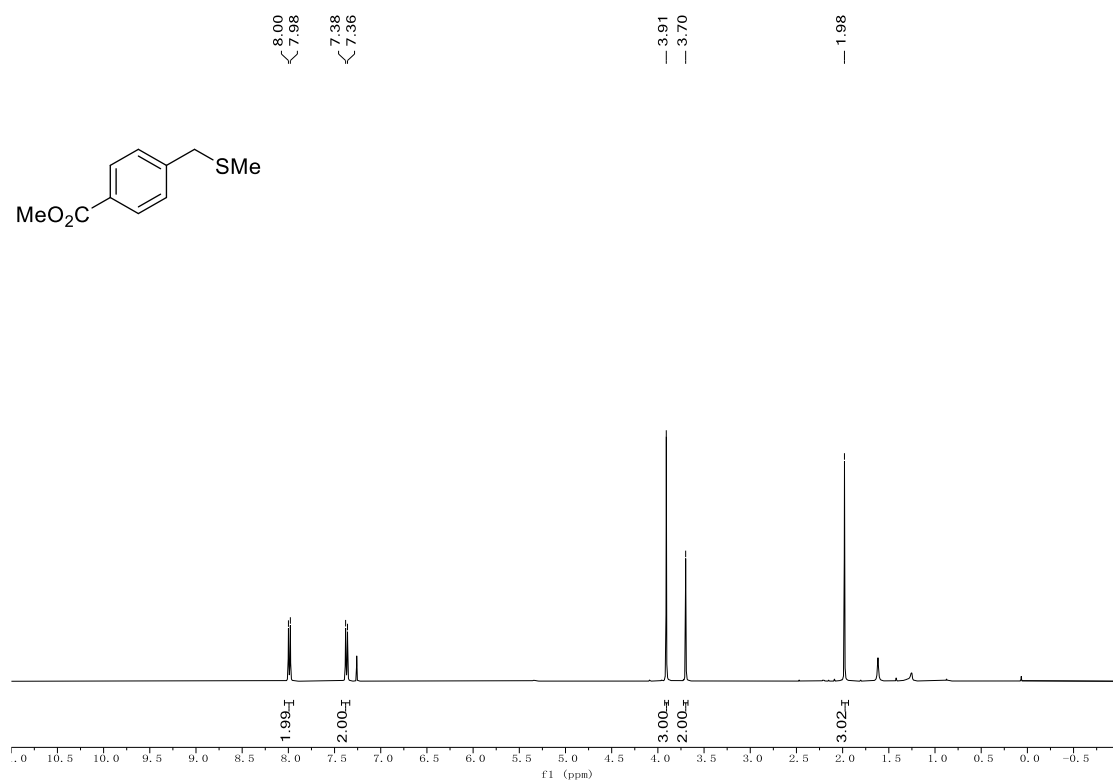

<sup>1</sup>H NMR of compound **3p** (400 MHz, CDCl<sub>3</sub>)

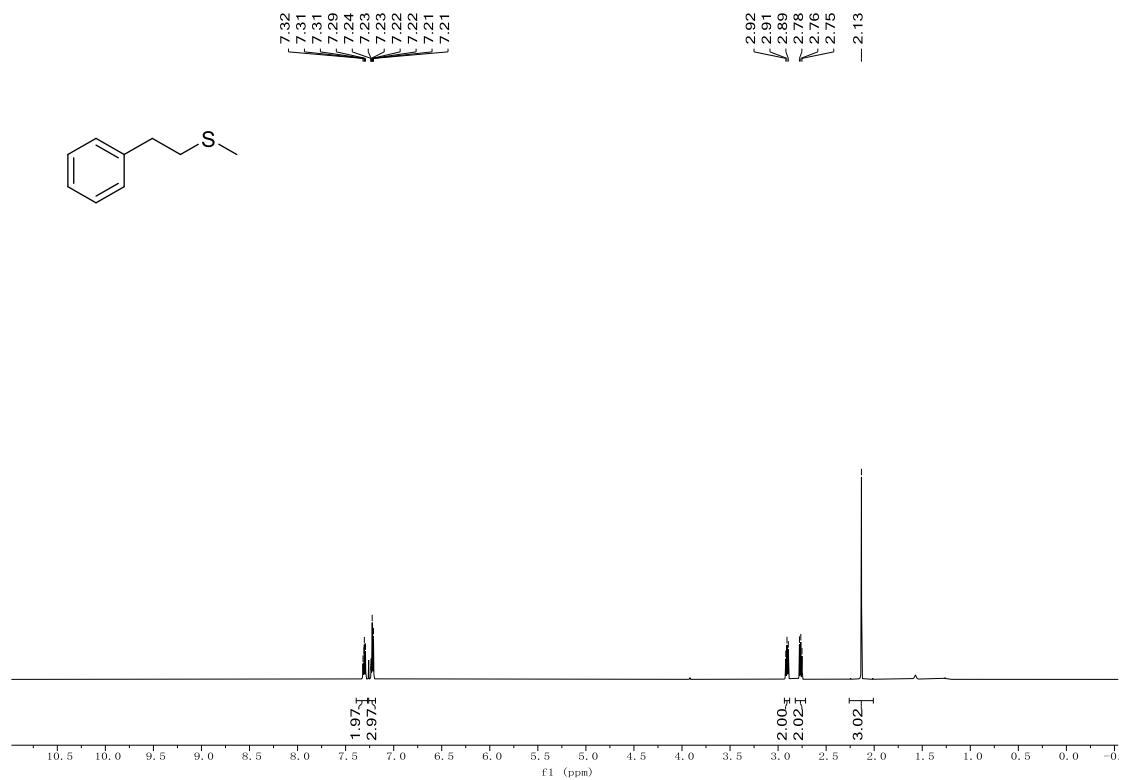

<sup>1</sup>H NMR of compound **3q** (600 MHz, CDCl<sub>3</sub>)

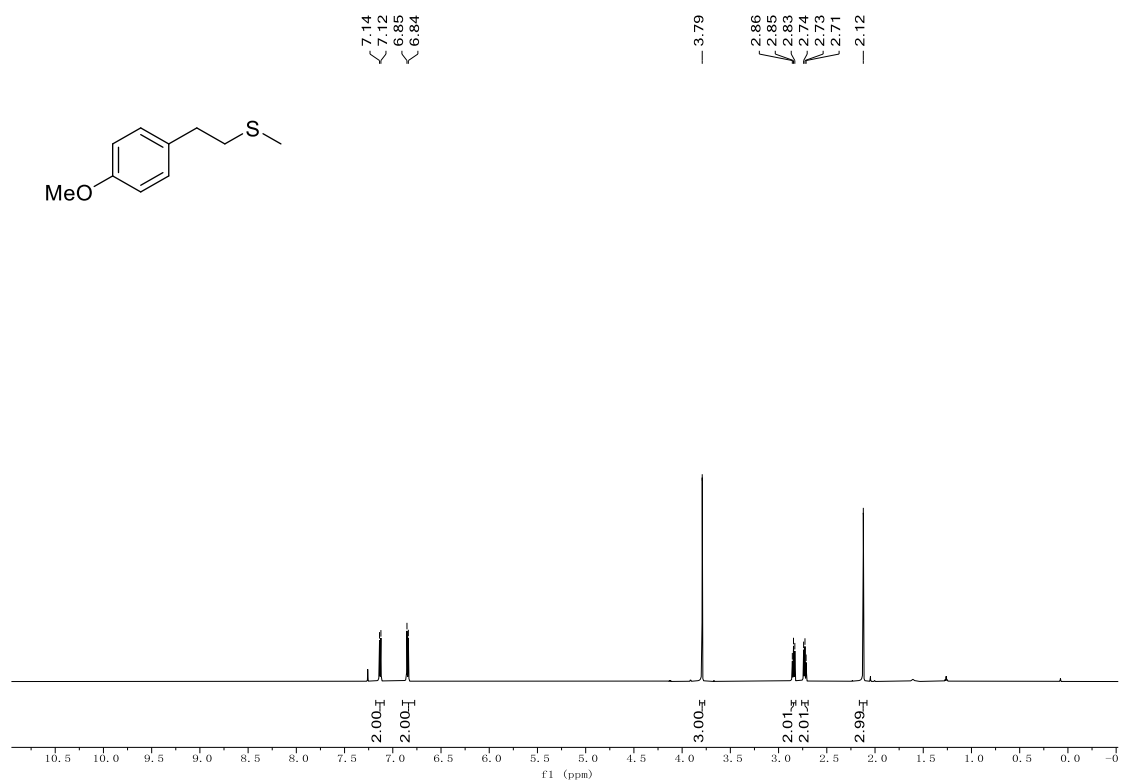

<sup>1</sup>H NMR of compound **3r** (600 MHz, CDCl<sub>3</sub>)

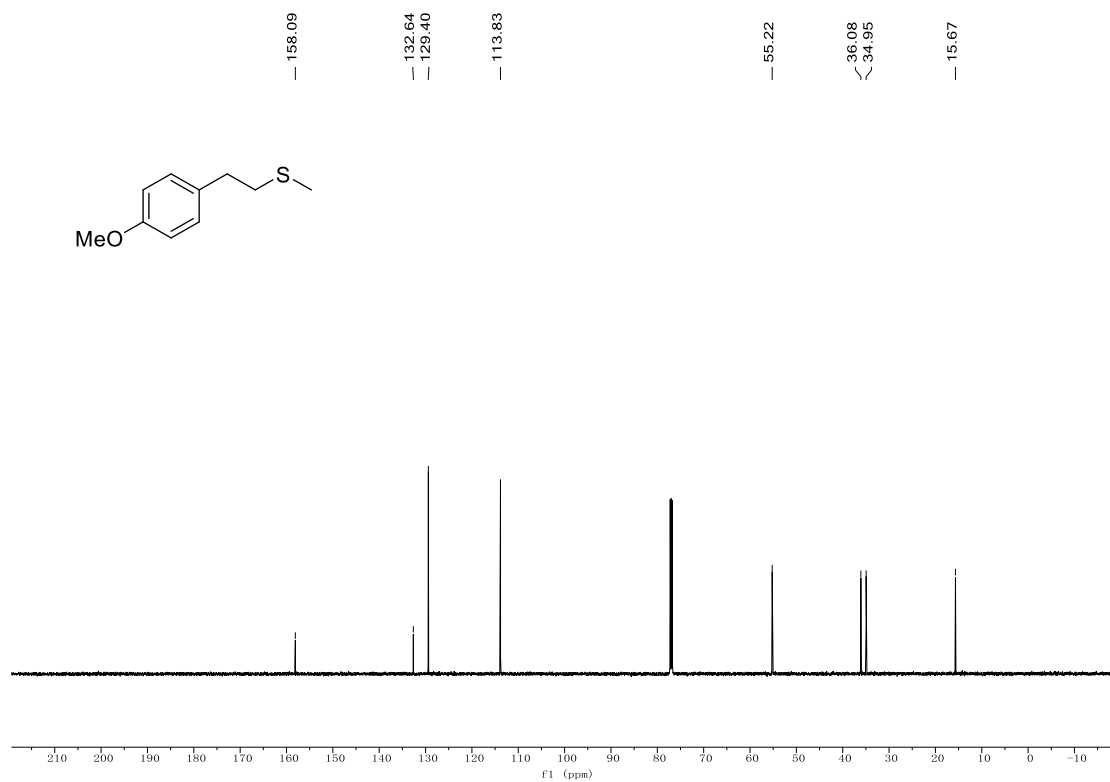

<sup>13</sup>C NMR of compound **3r** (151 MHz, CDCl<sub>3</sub>)

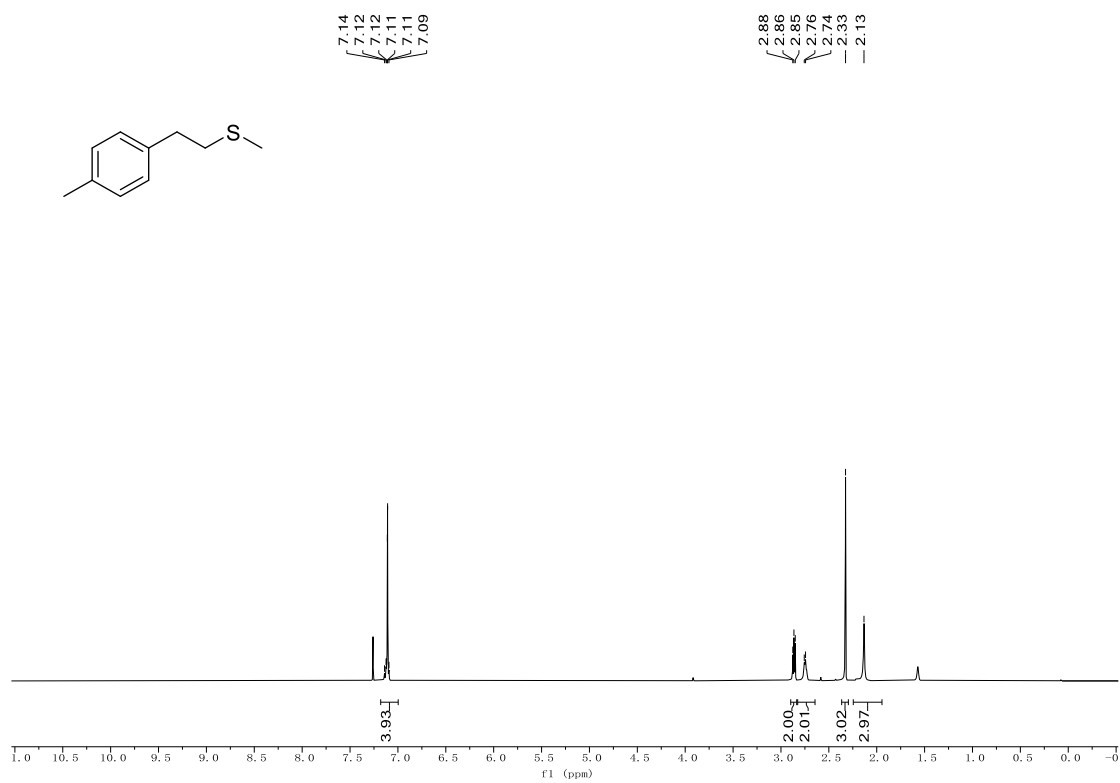

<sup>1</sup>H NMR of compound **3s** (600 MHz, CDCl<sub>3</sub>)

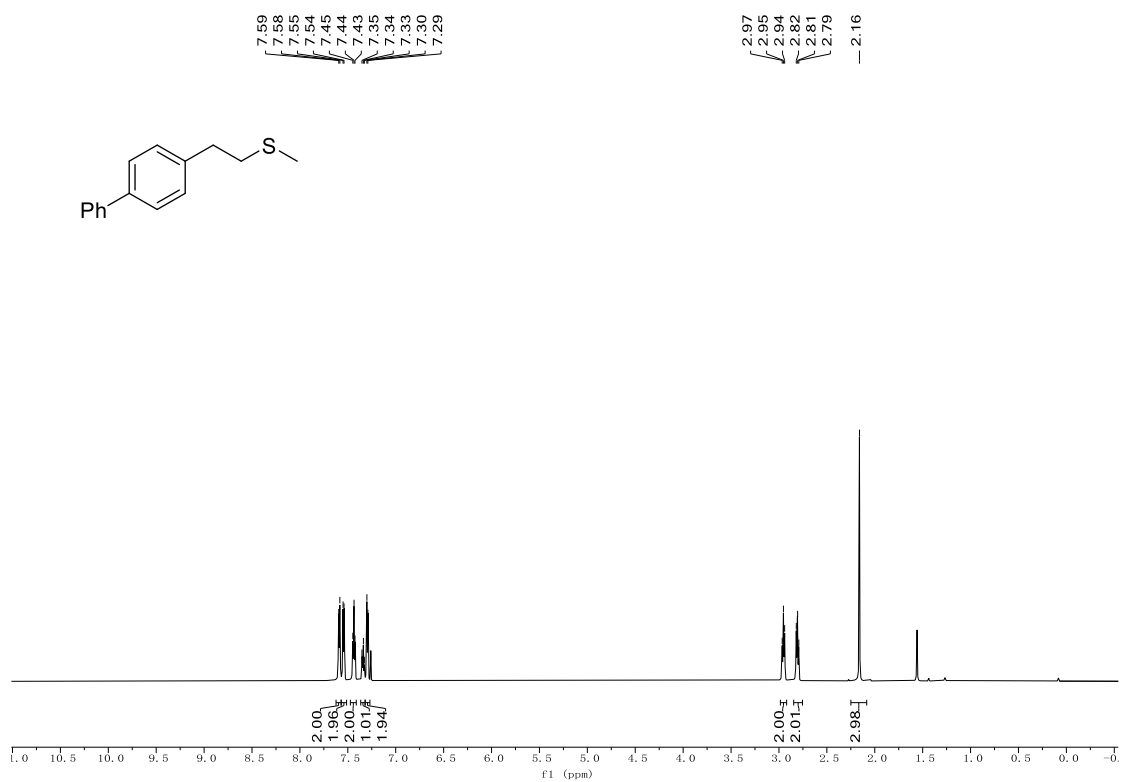

<sup>1</sup>H NMR of compound **3t** (600 MHz, CDCl<sub>3</sub>)

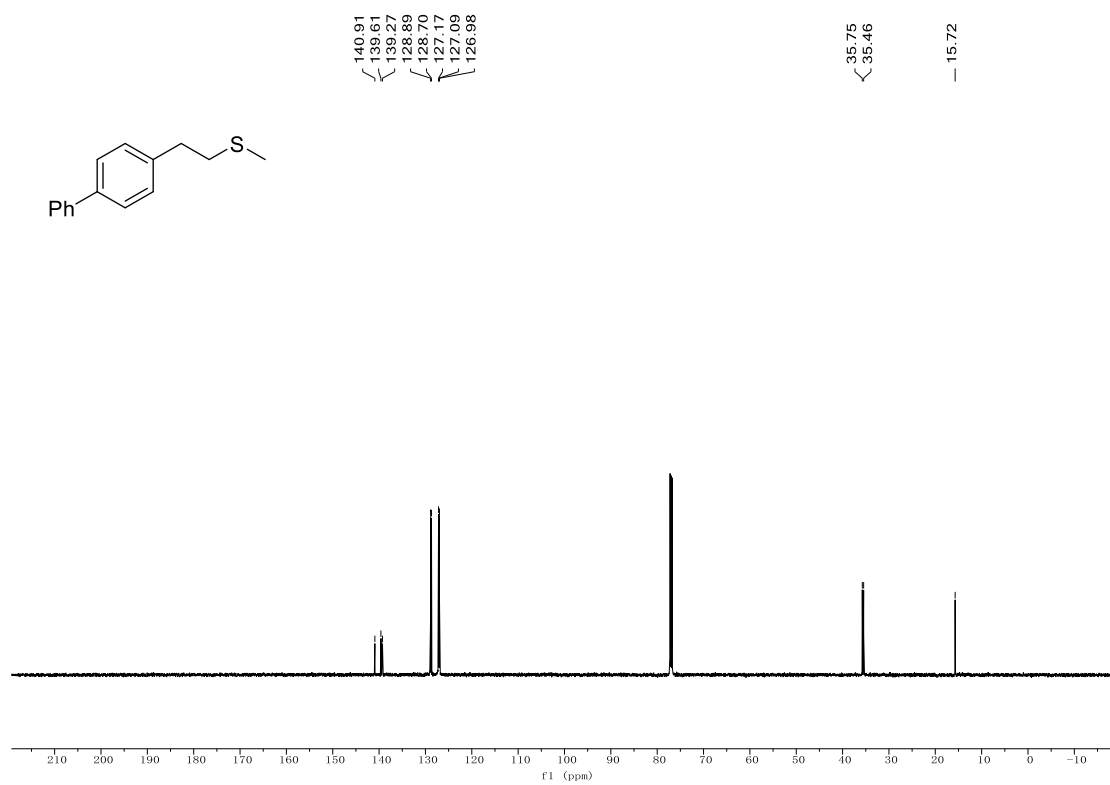

<sup>13</sup>C NMR of compound **3t** (151 MHz, CDCl<sub>3</sub>)

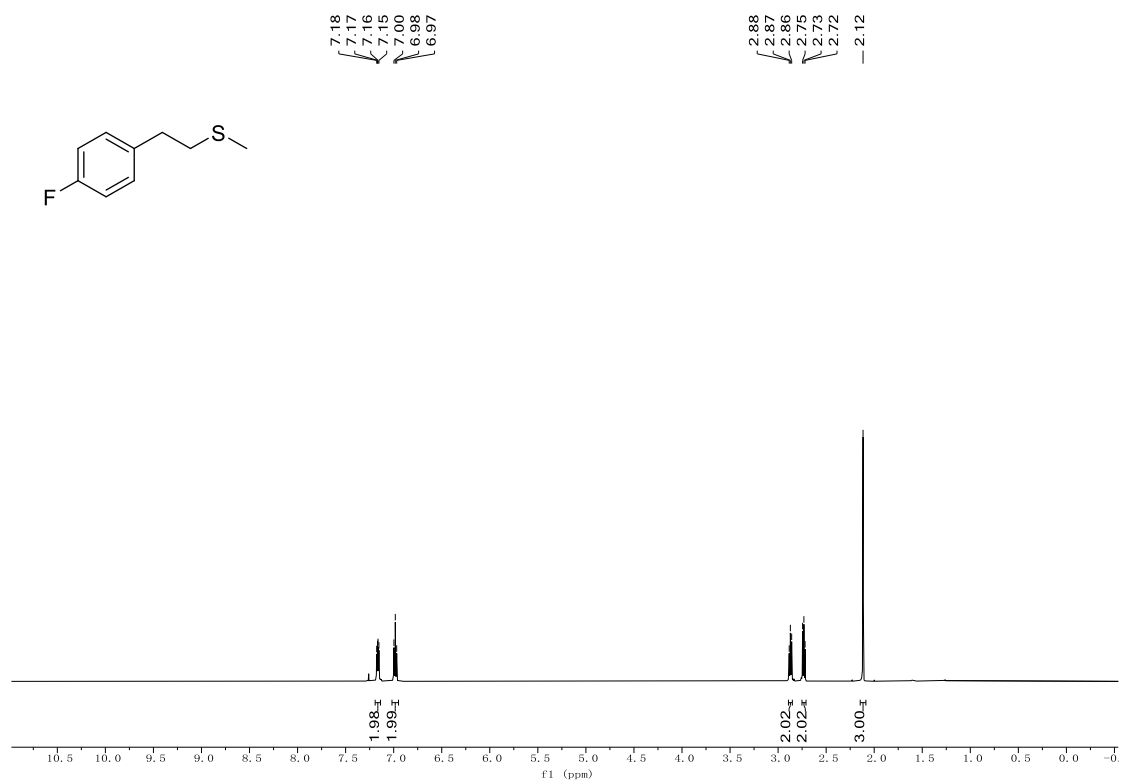

<sup>1</sup>H NMR of compound **3u** (600 MHz, CDCl<sub>3</sub>)

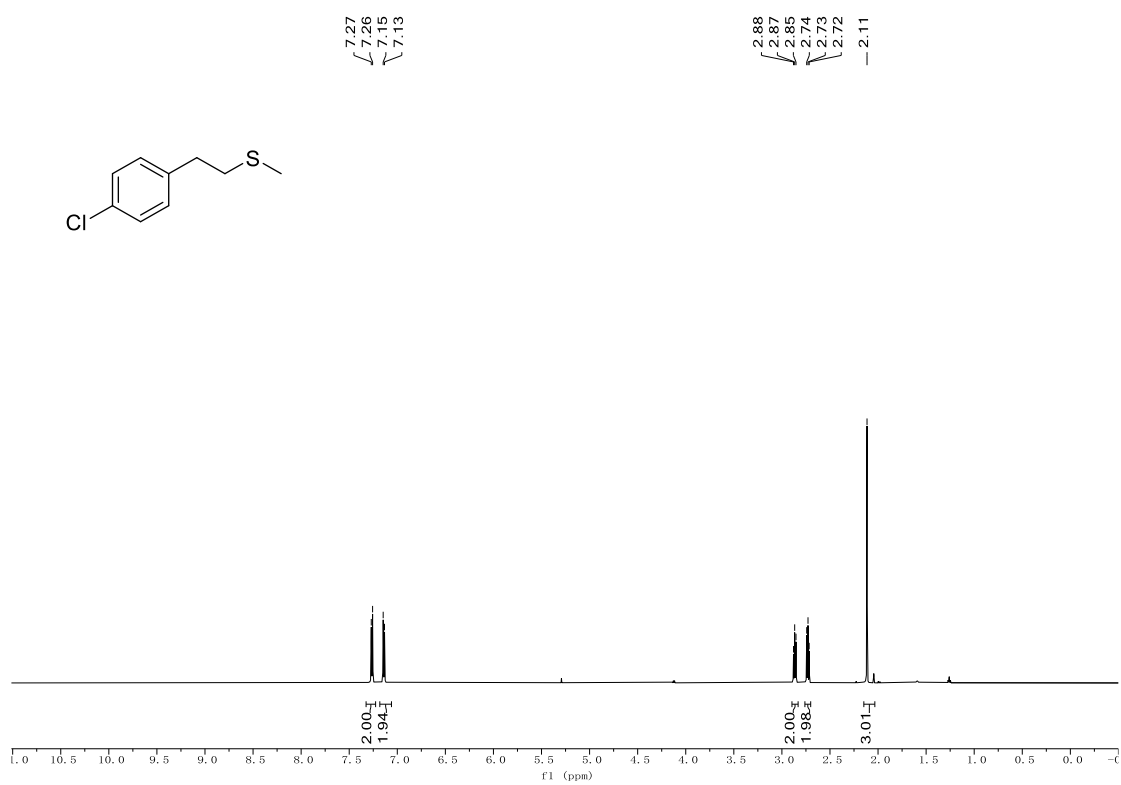

<sup>1</sup>H NMR of compound **3v** (600 MHz, CDCl<sub>3</sub>)



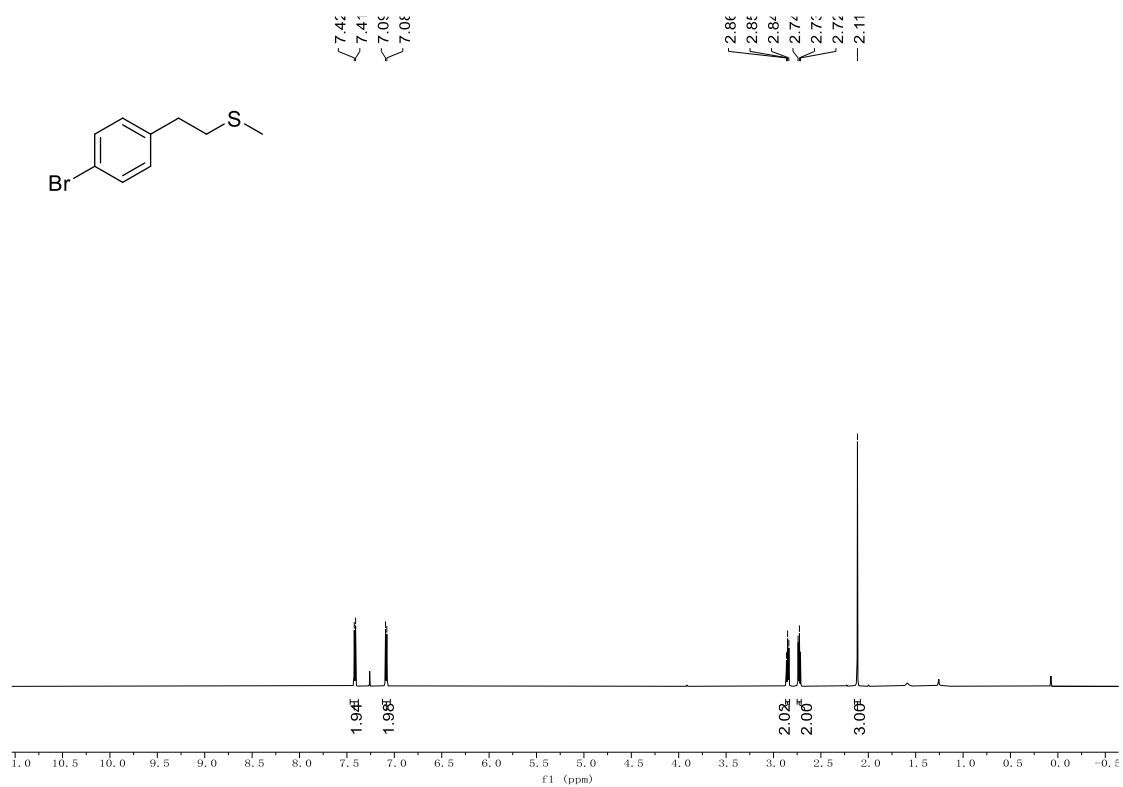

<sup>1</sup>H NMR of compound **3w** (600 MHz, CDCl<sub>3</sub>)

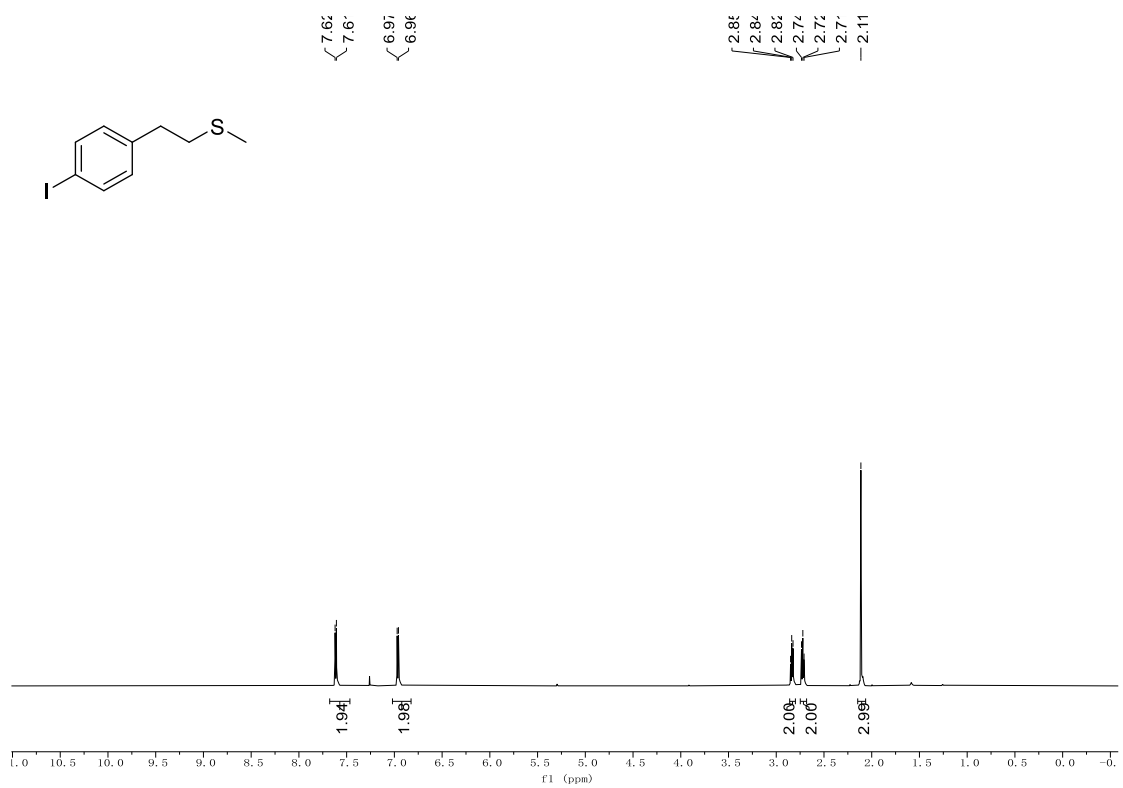

<sup>1</sup>H NMR of compound **3x** (600 MHz, CDCl<sub>3</sub>)

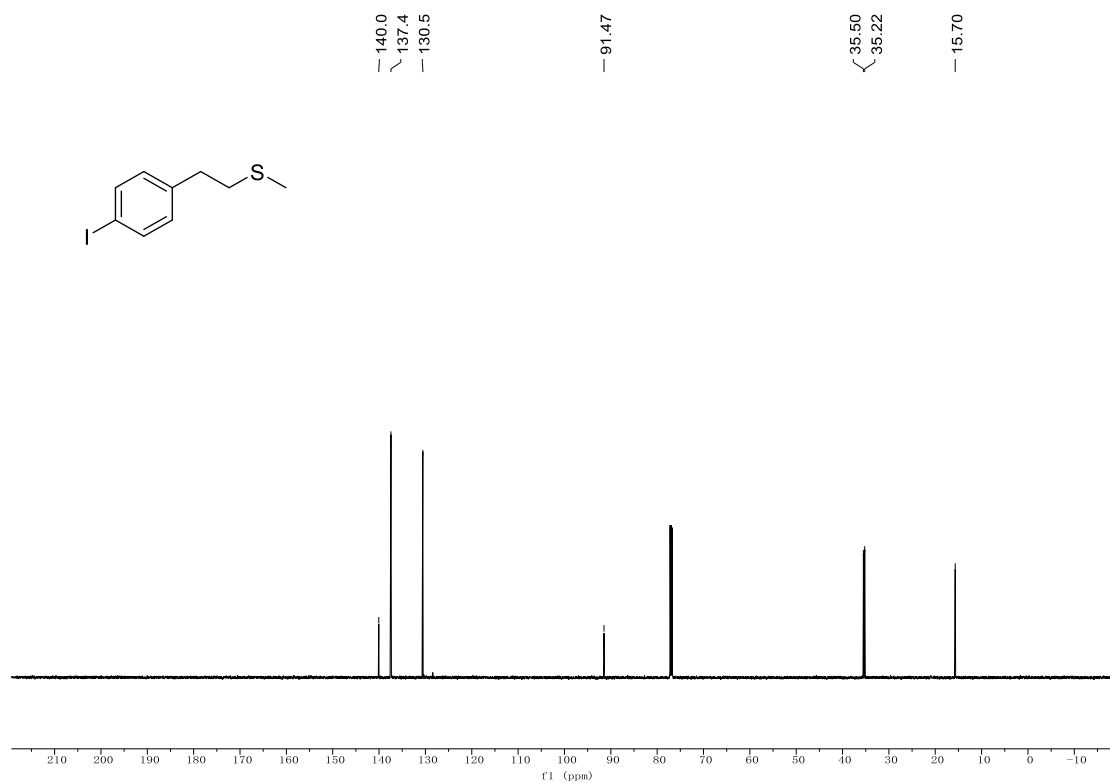

<sup>13</sup>C NMR of compound **3x** (151 MHz, CDCl<sub>3</sub>)

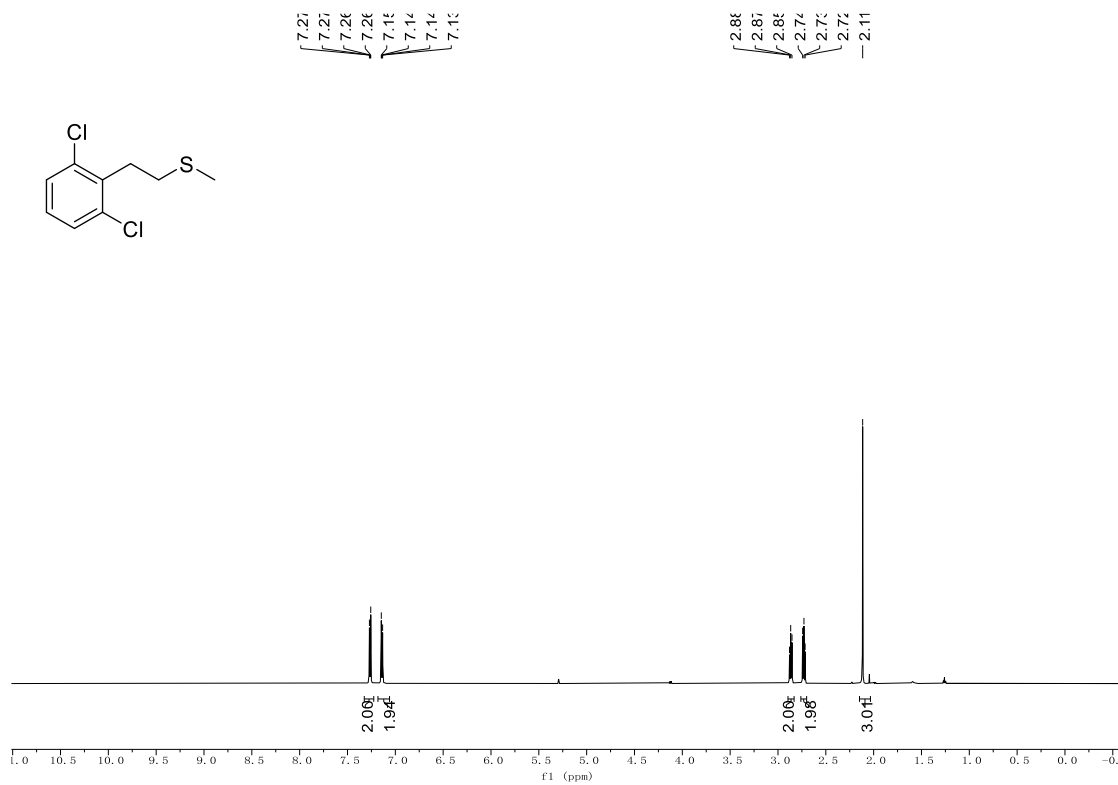

<sup>1</sup>H NMR of compound **3y** (600 MHz, CDCl<sub>3</sub>)

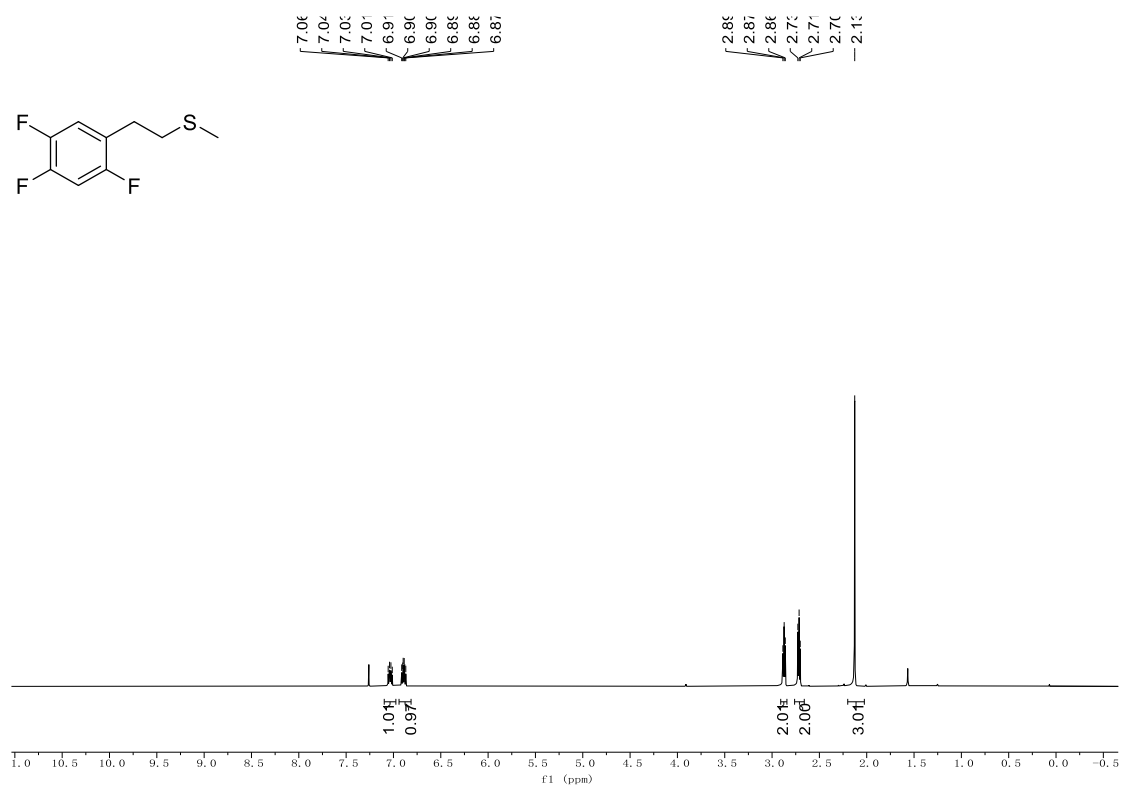

<sup>1</sup>H NMR of compound **3z** (600 MHz, CDCl<sub>3</sub>)

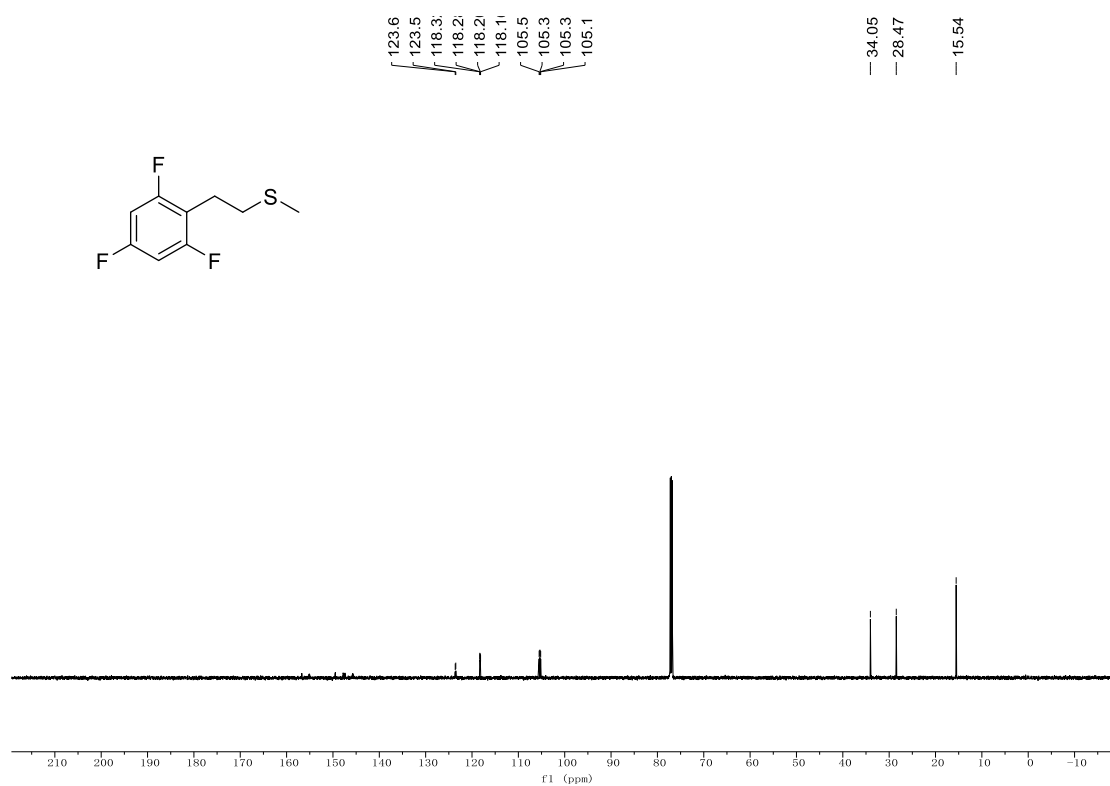

<sup>13</sup>C NMR of compound **3z** (151 MHz, CDCl<sub>3</sub>)

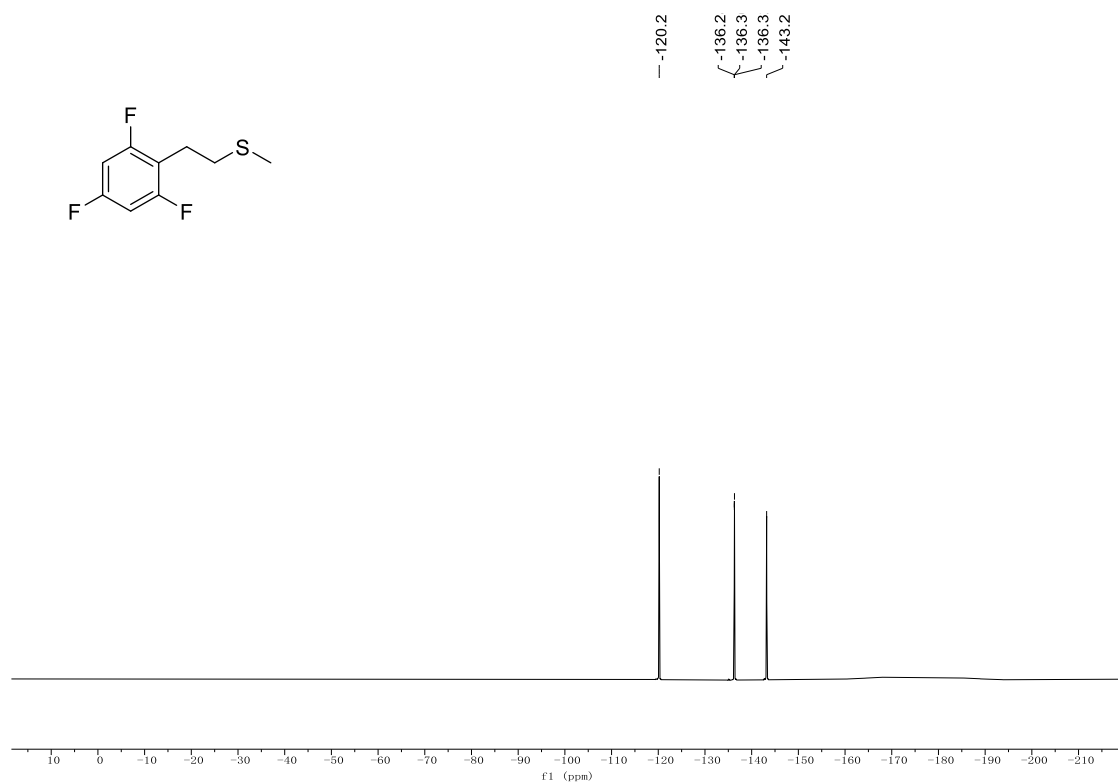

$^{19}\text{F}$  NMR of compound **3z** (600 MHz,  $\text{CDCl}_3$ )

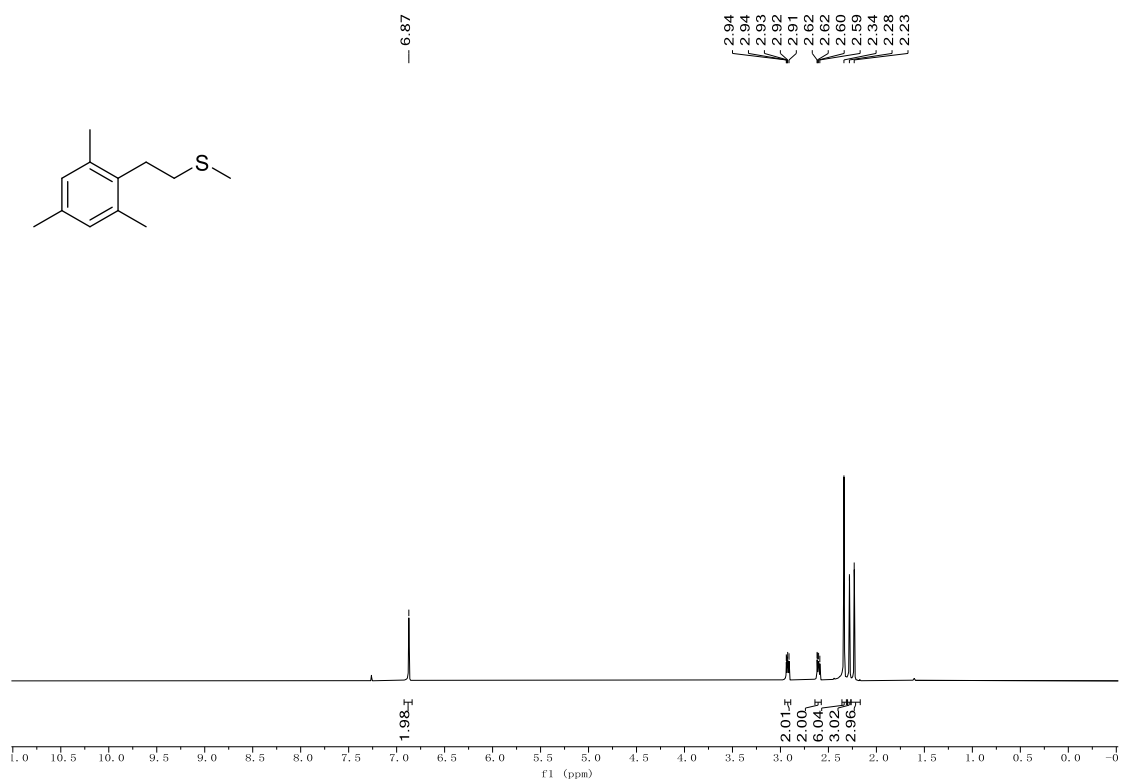

$^1\text{H}$  NMR of compound **3aa** (600 MHz,  $\text{CDCl}_3$ )

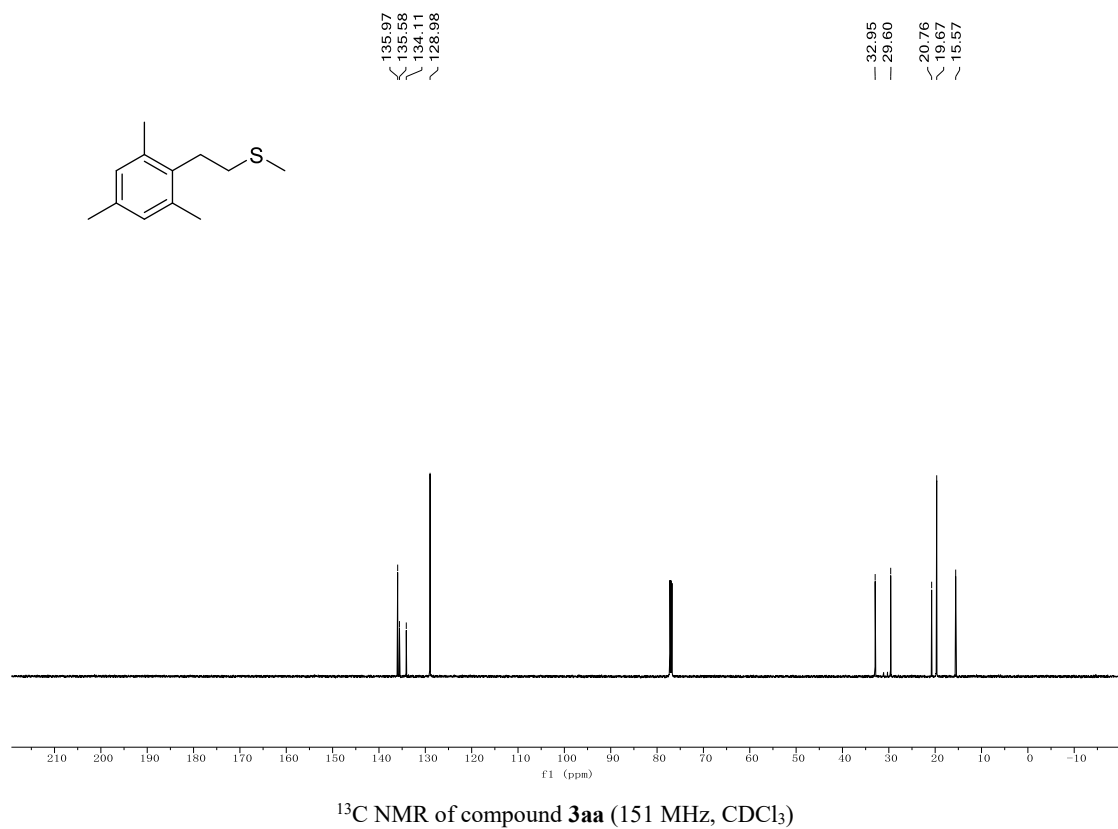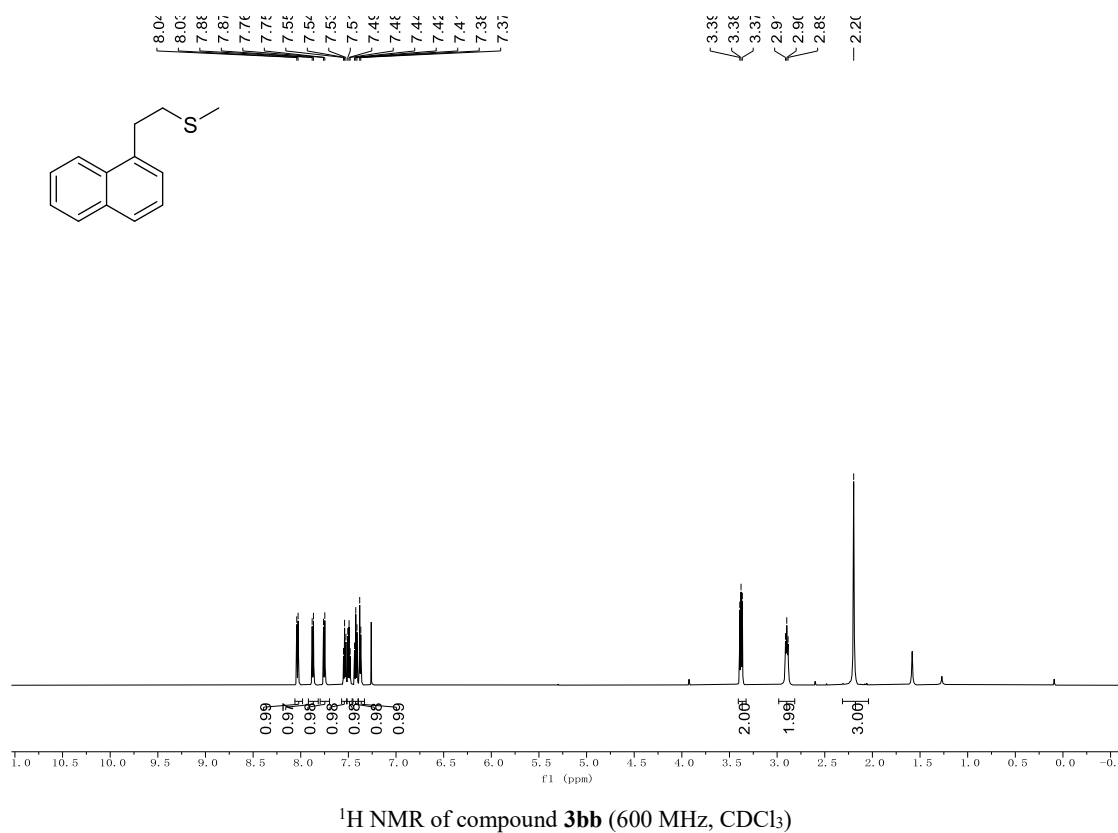

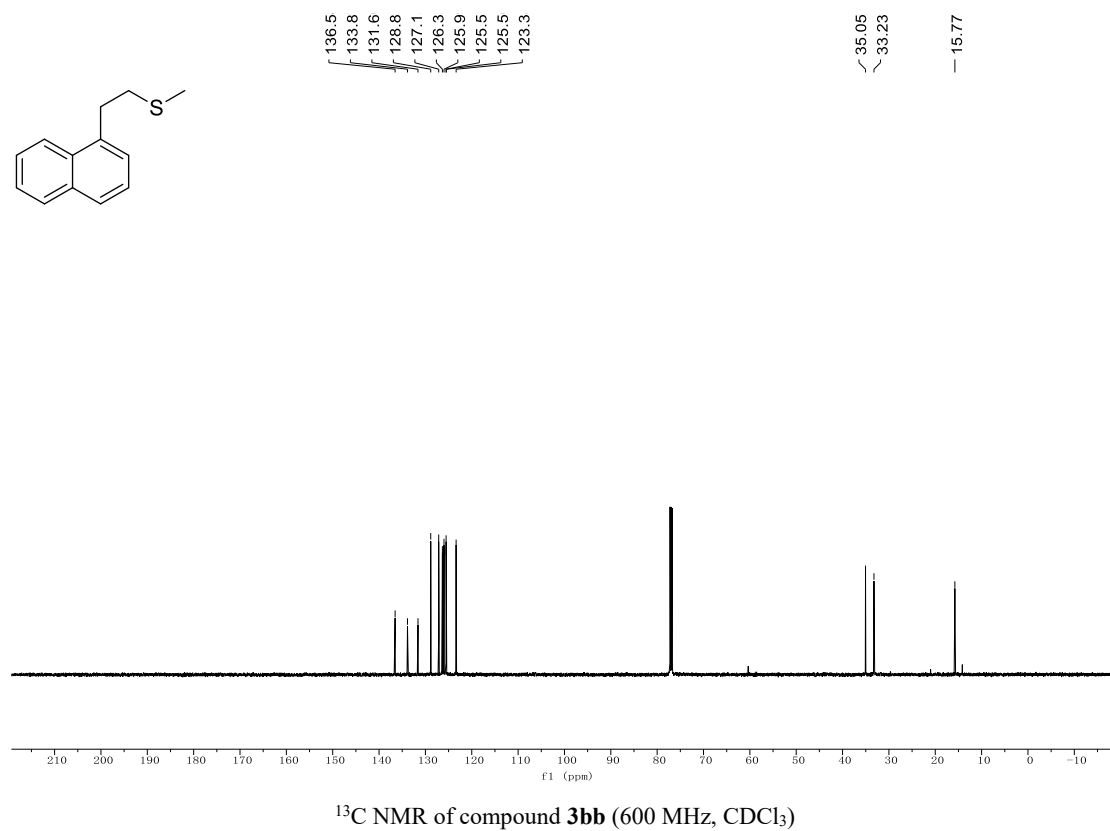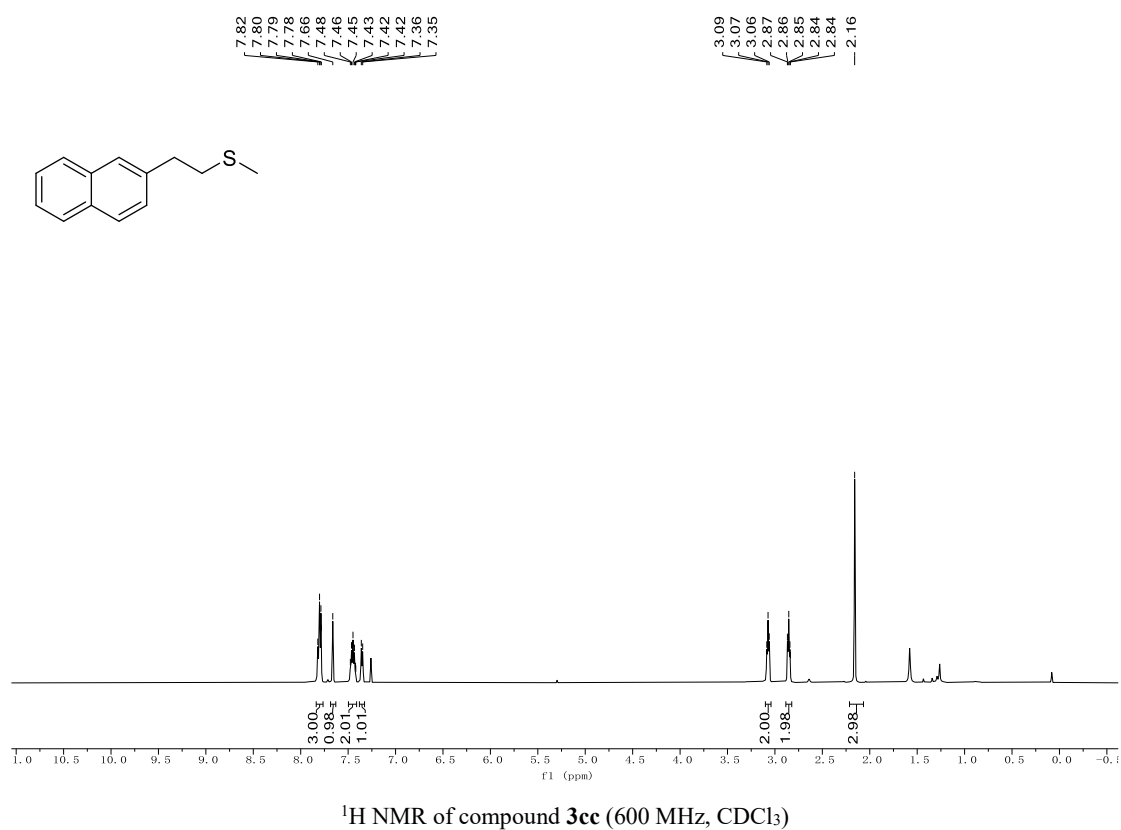

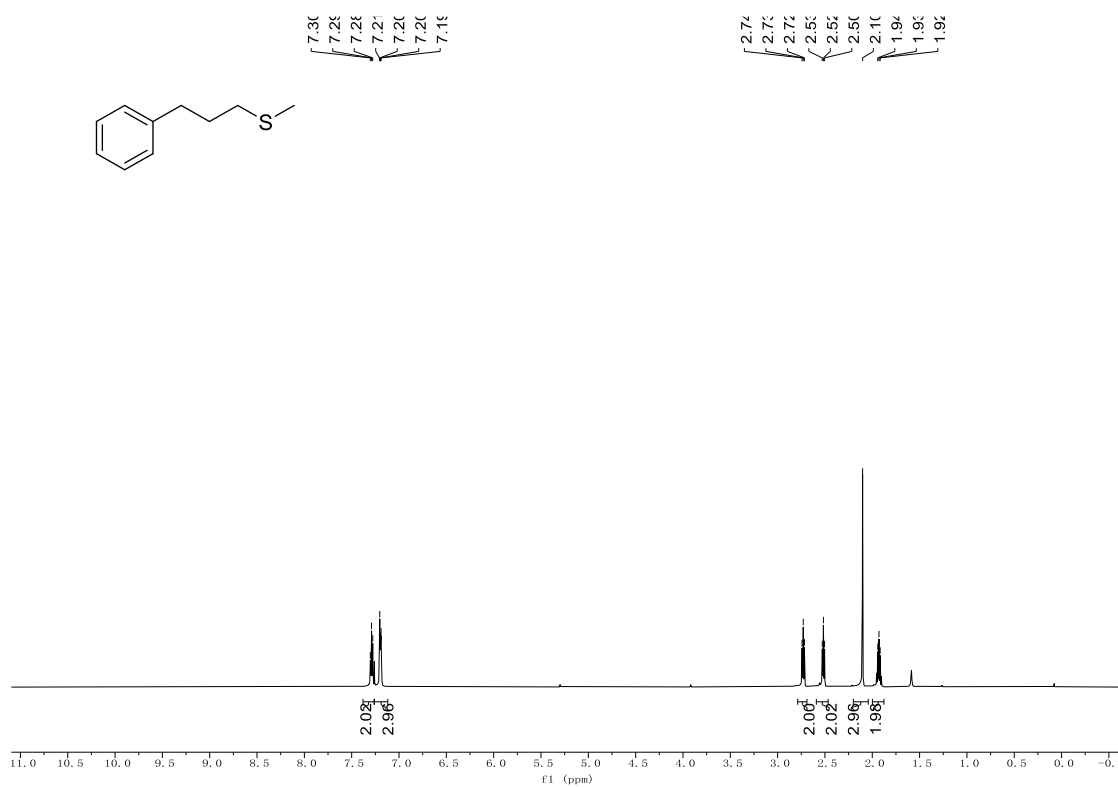

<sup>1</sup>H NMR of compound **3dd** (600 MHz, CDCl<sub>3</sub>)

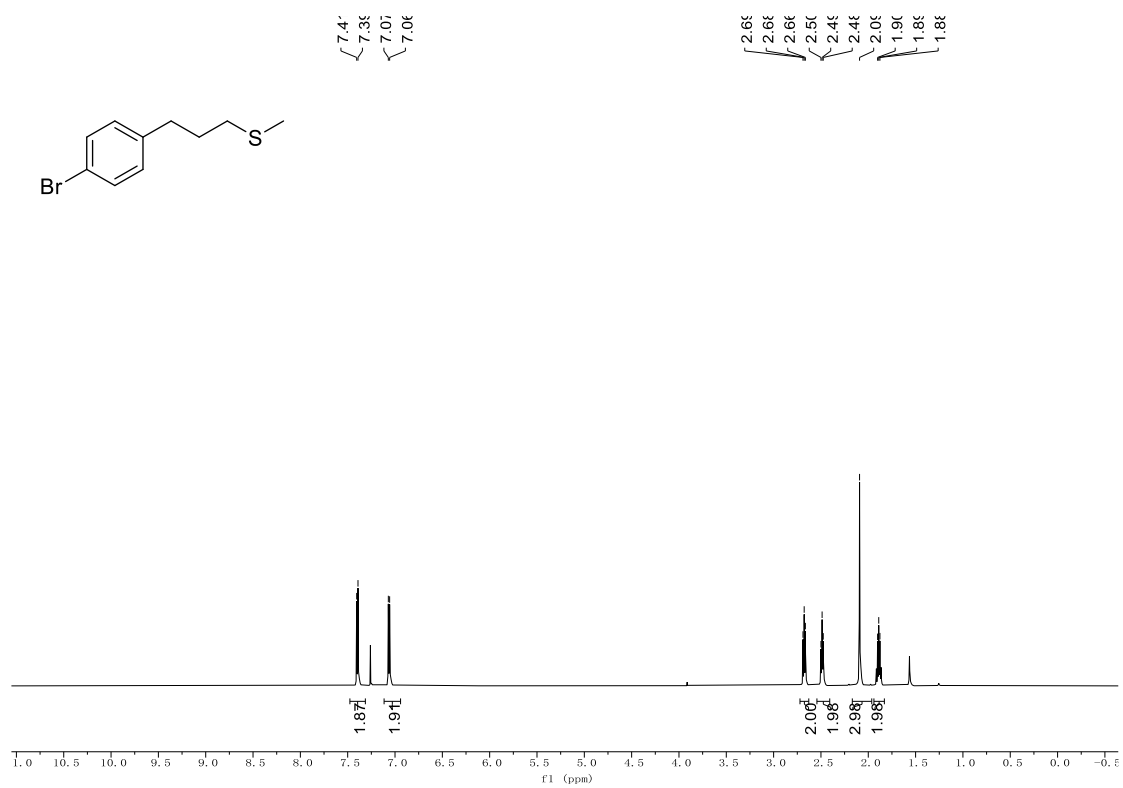

<sup>1</sup>H NMR of compound **3ee** (600 MHz, CDCl<sub>3</sub>)

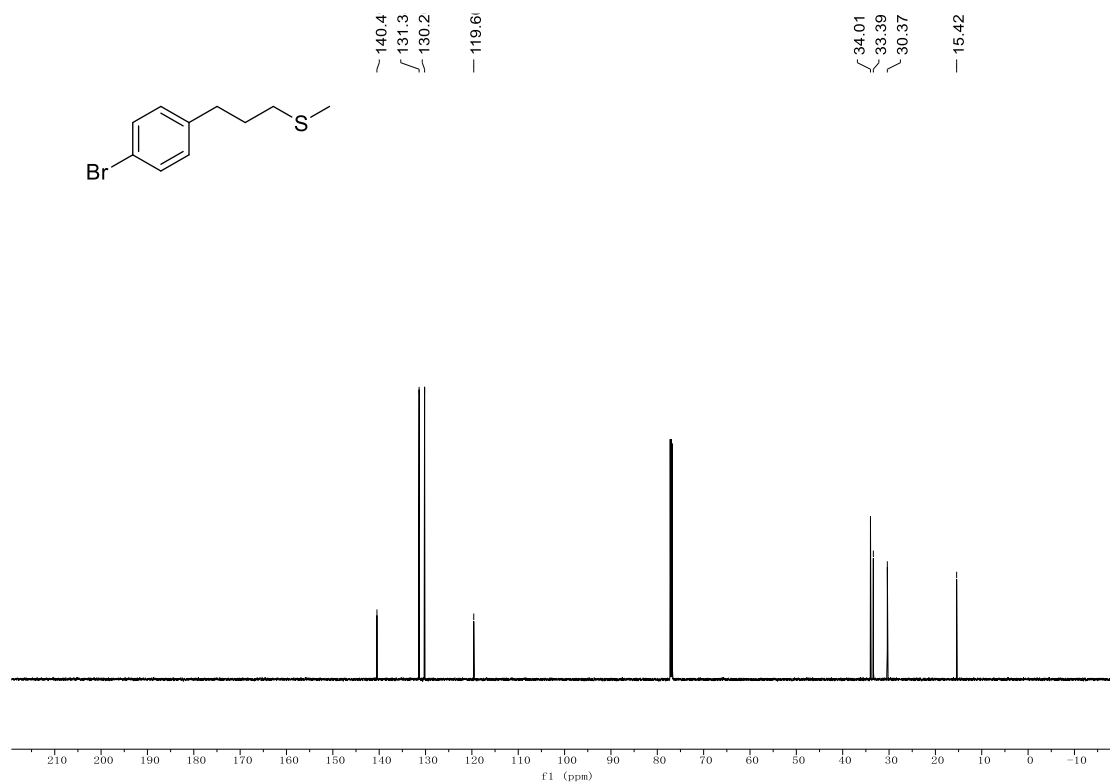

$^{13}\text{C}$  NMR of compound **3ee** (151 MHz,  $\text{CDCl}_3$ )

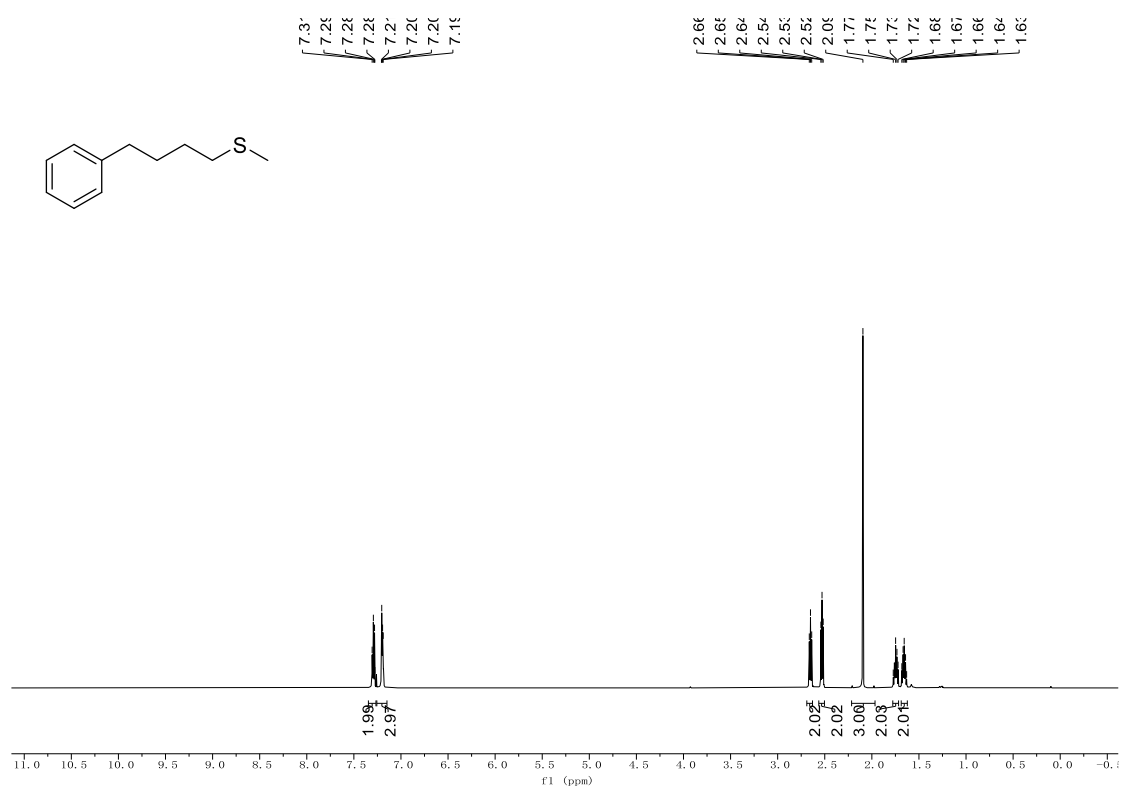

$^1\text{H}$  NMR of compound **3ff** (600 MHz,  $\text{CDCl}_3$ )



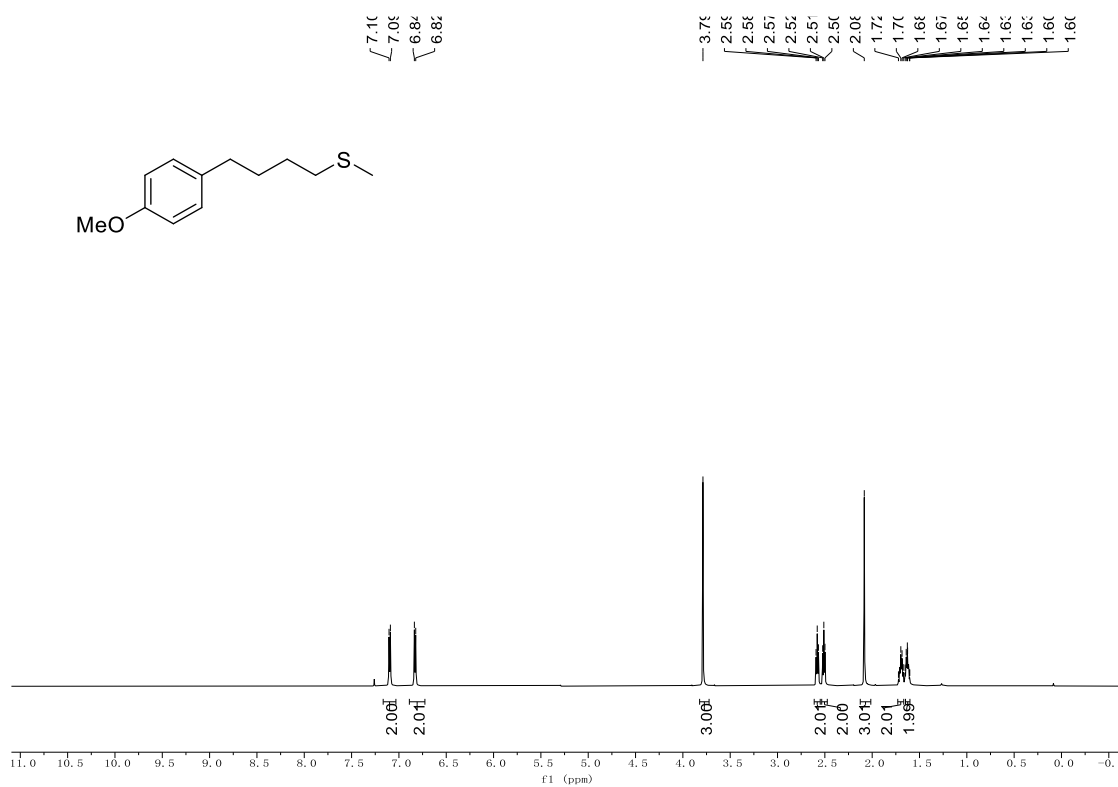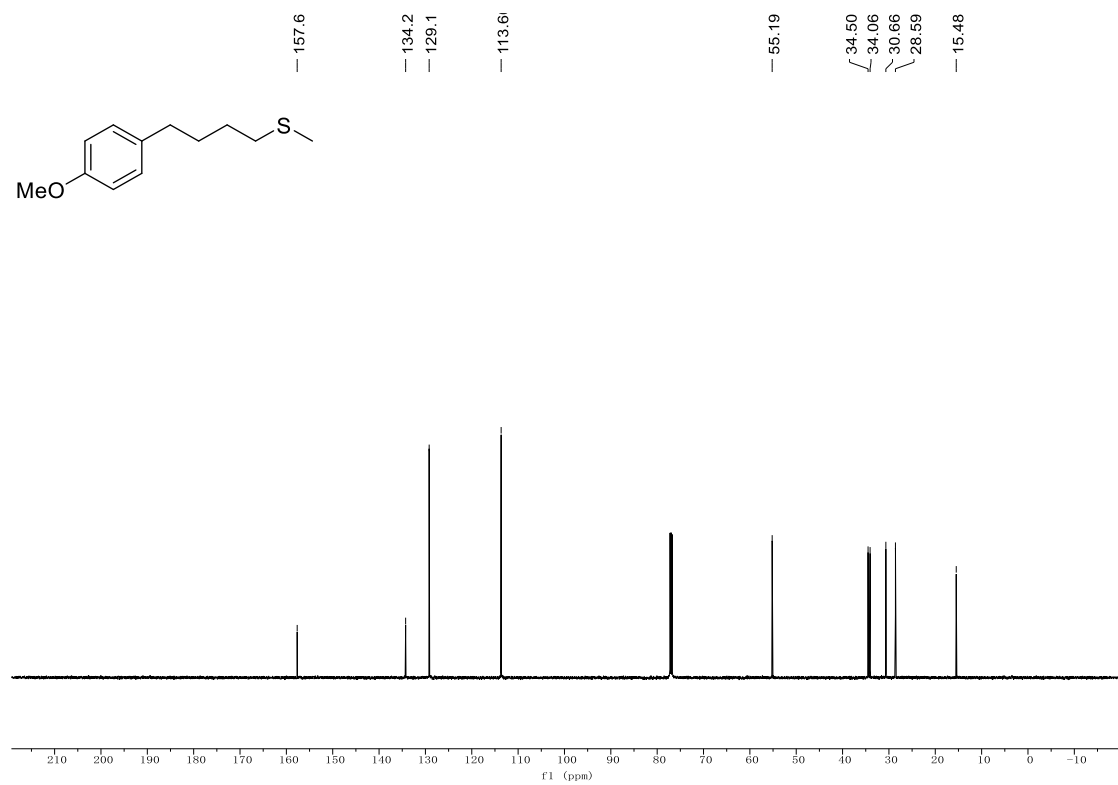

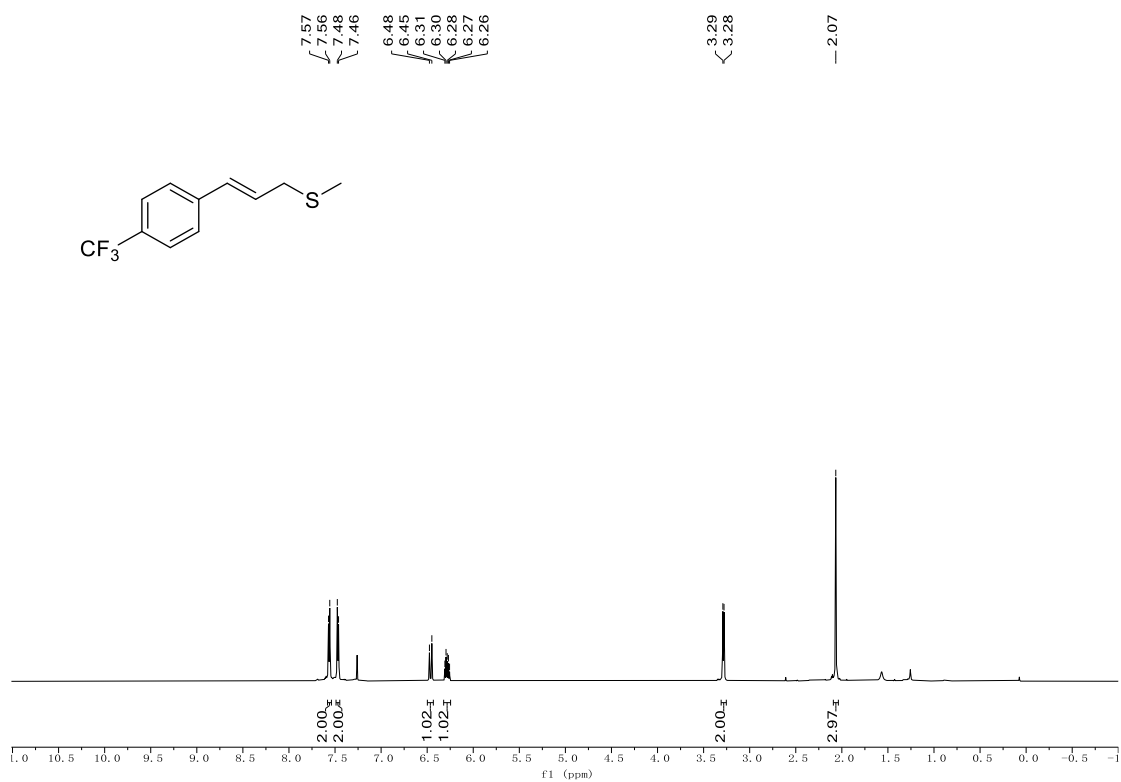

<sup>1</sup>H NMR of compound **3hh** (600 MHz, CDCl<sub>3</sub>)

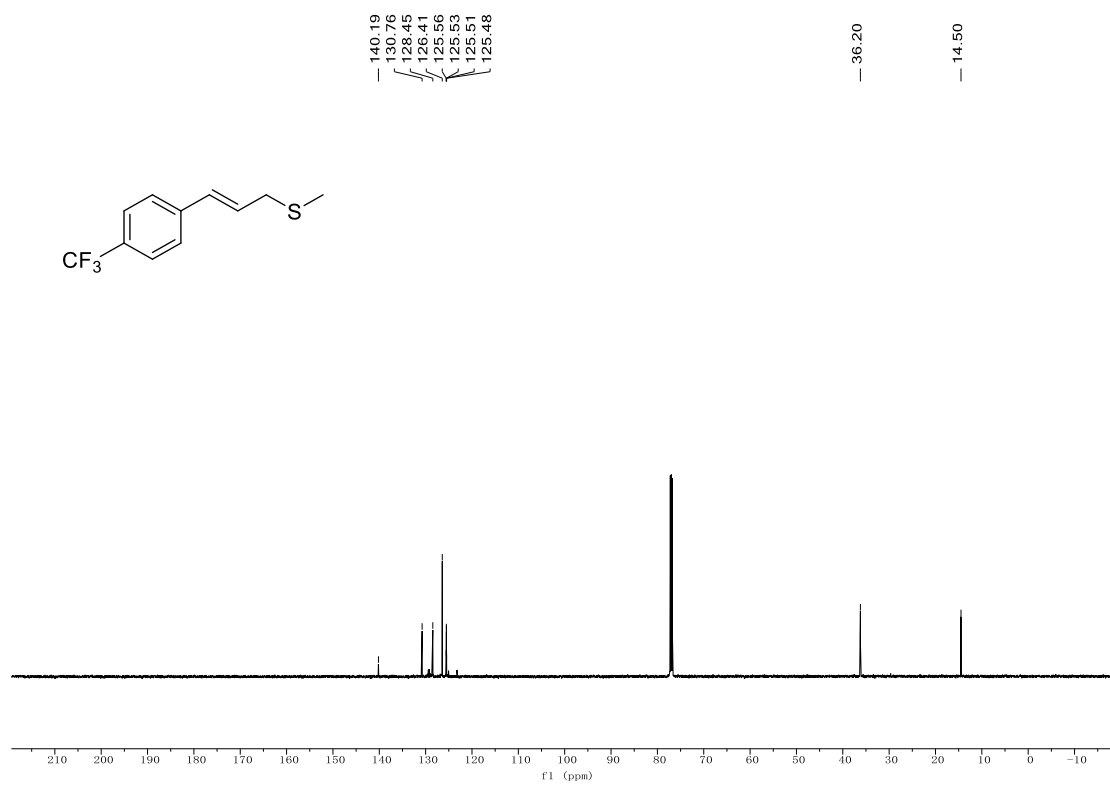

<sup>13</sup>C NMR of compound **3hh** (151 MHz, CDCl<sub>3</sub>)

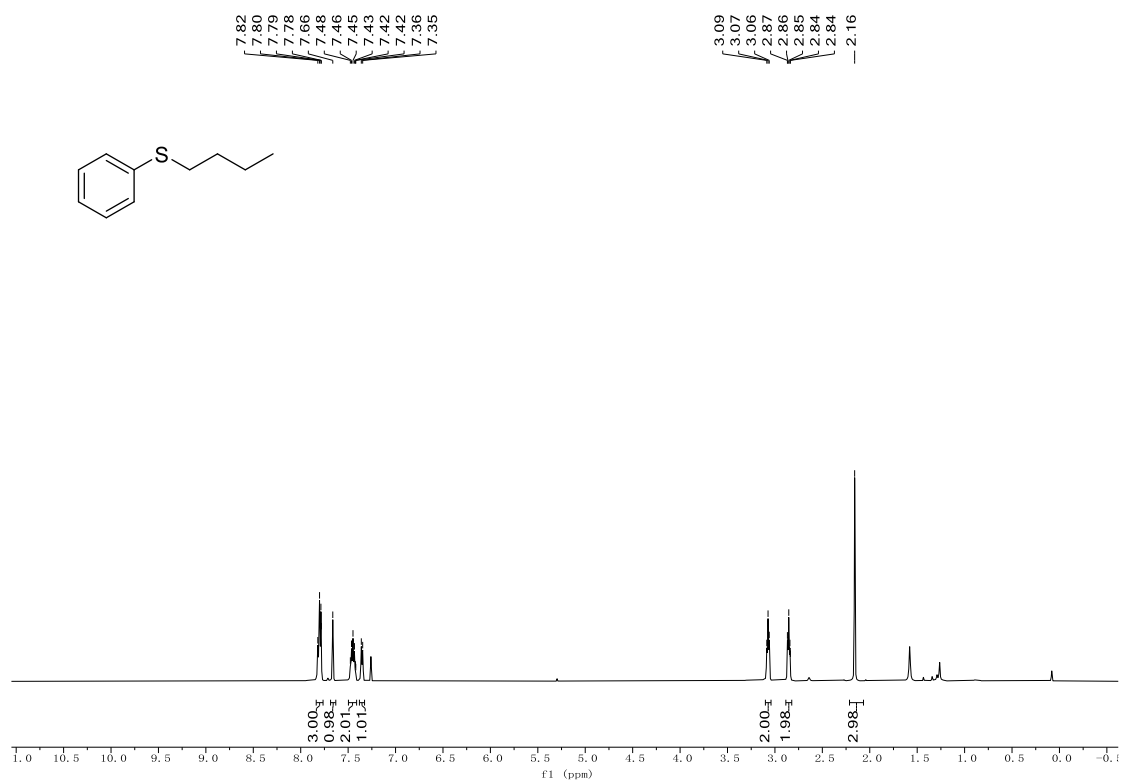

<sup>1</sup>H NMR of compound **4a** (600 MHz, CDCl<sub>3</sub>)

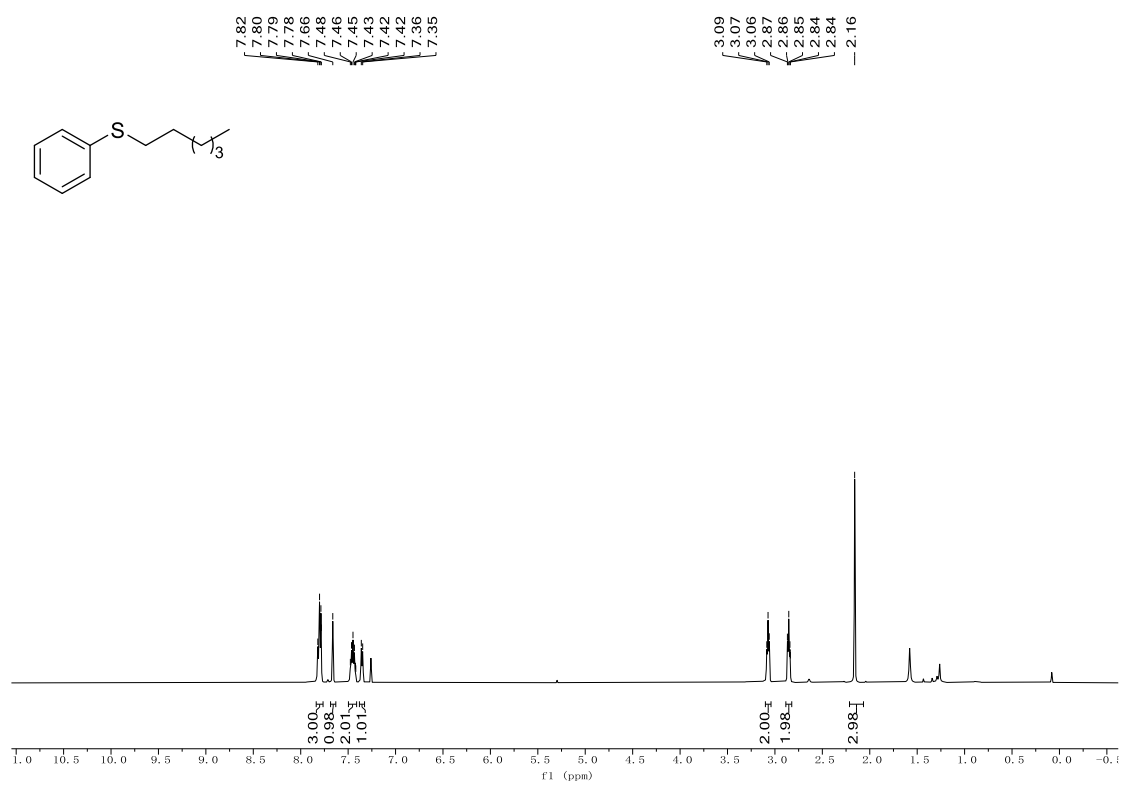

<sup>1</sup>H NMR of compound **4b** (600 MHz, CDCl<sub>3</sub>)

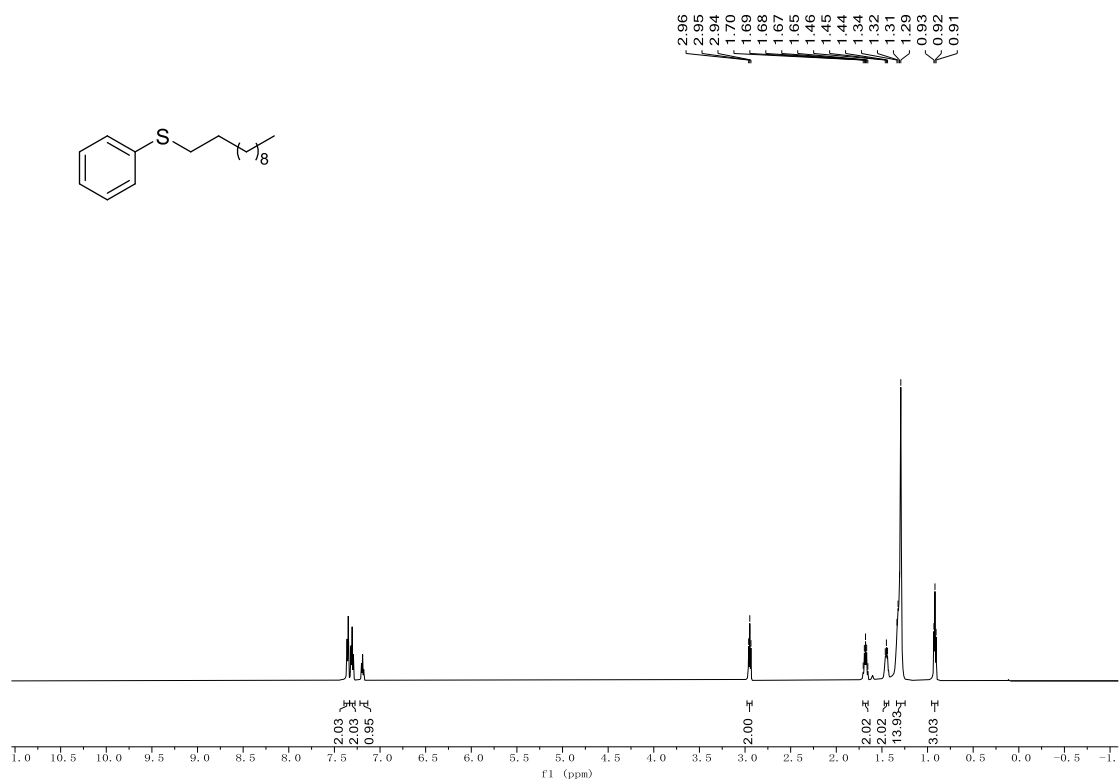

<sup>1</sup>H NMR of compound **4c** (600 MHz, CDCl<sub>3</sub>)

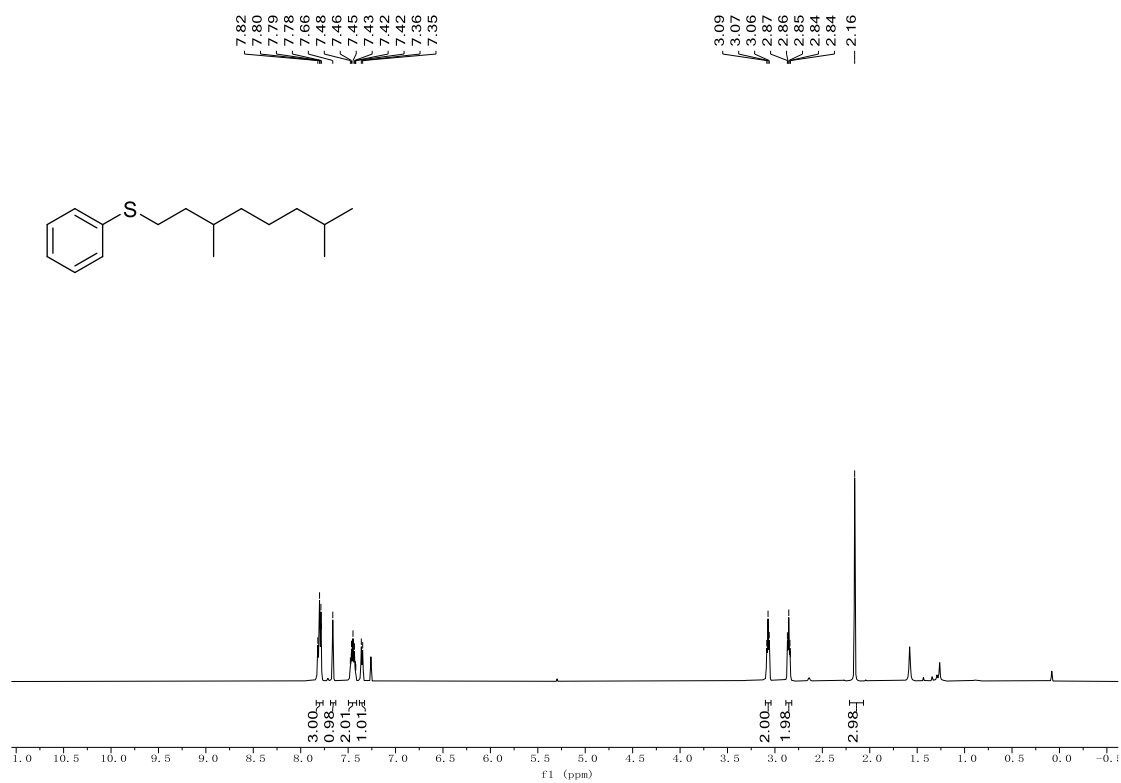

<sup>1</sup>H NMR of compound **4d** (600 MHz, CDCl<sub>3</sub>)

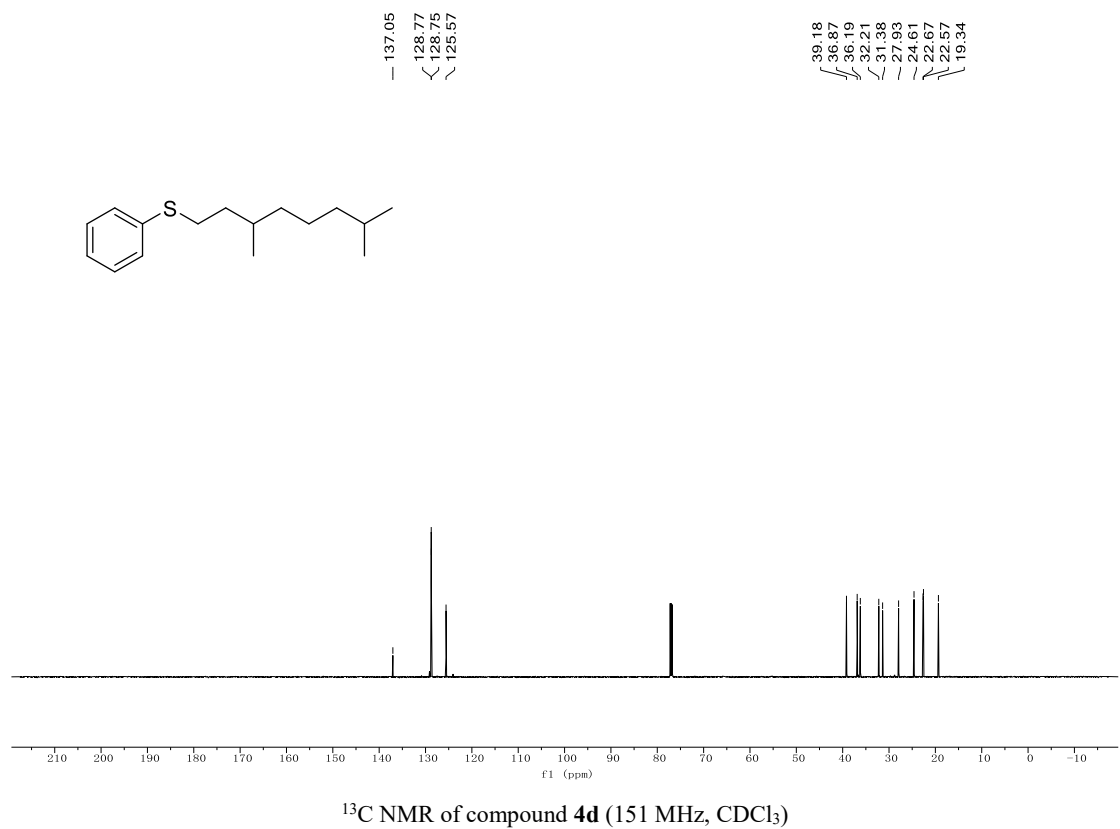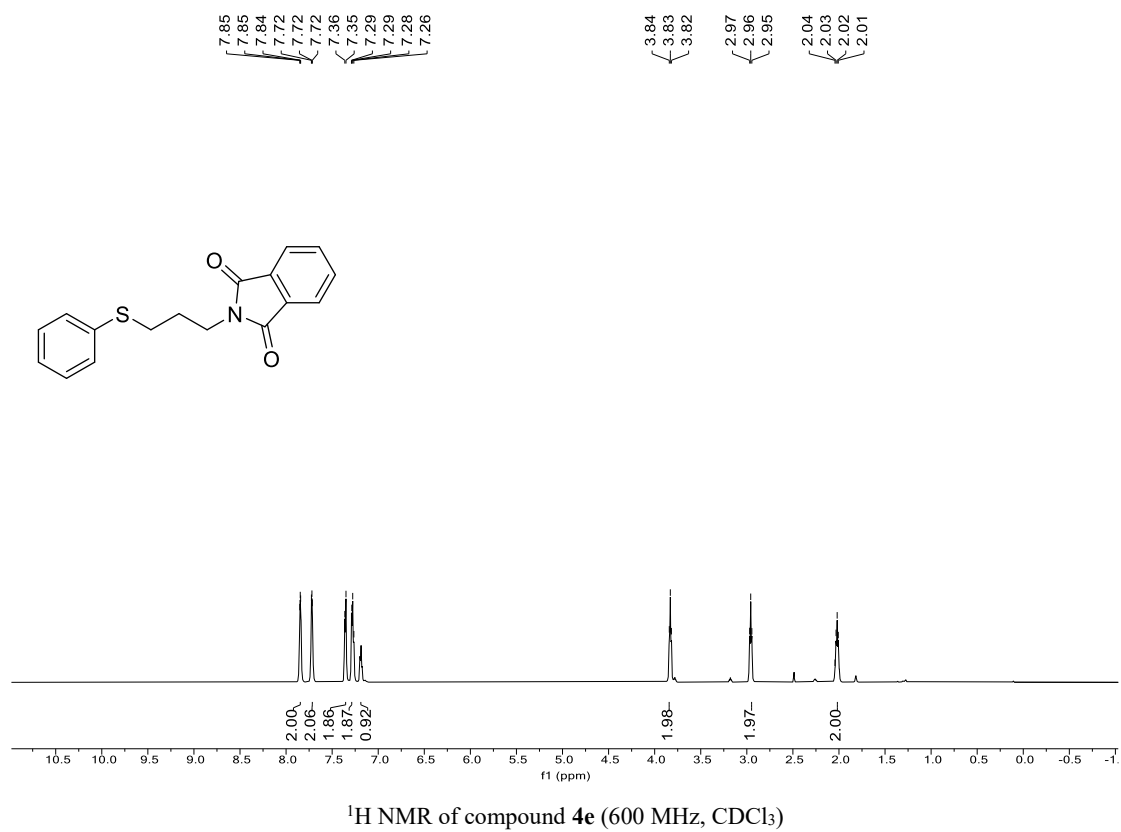

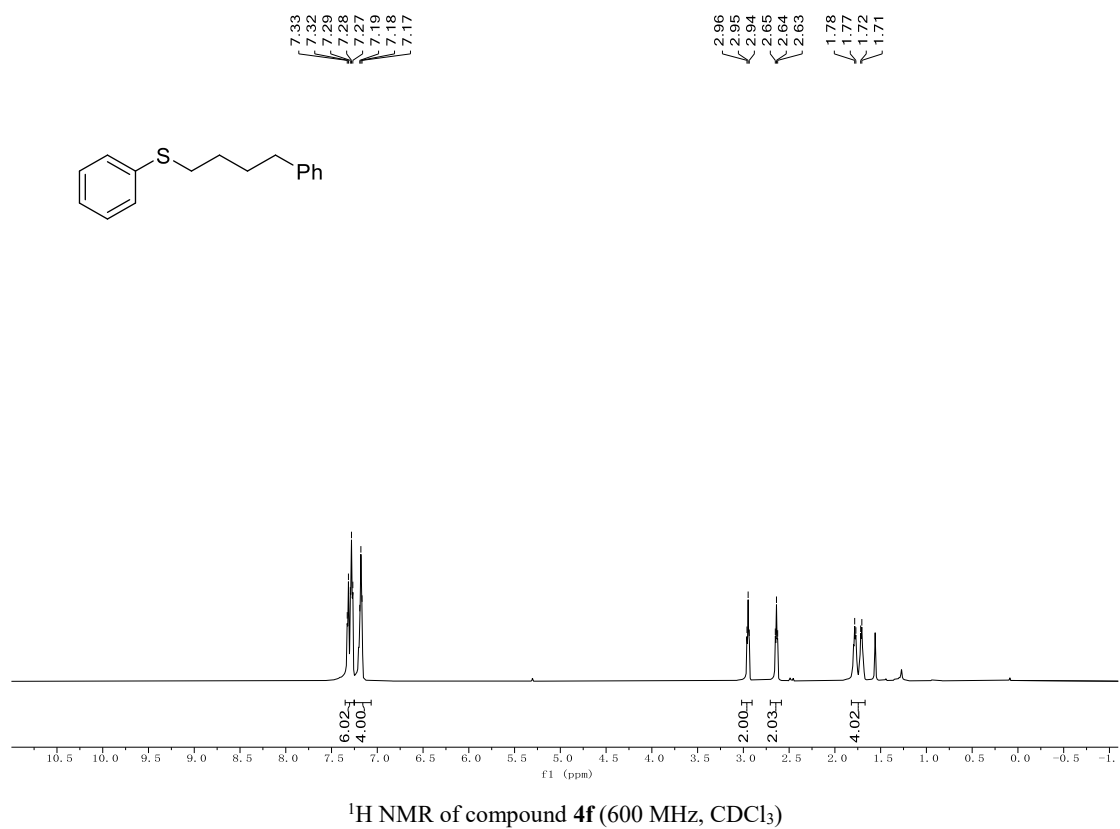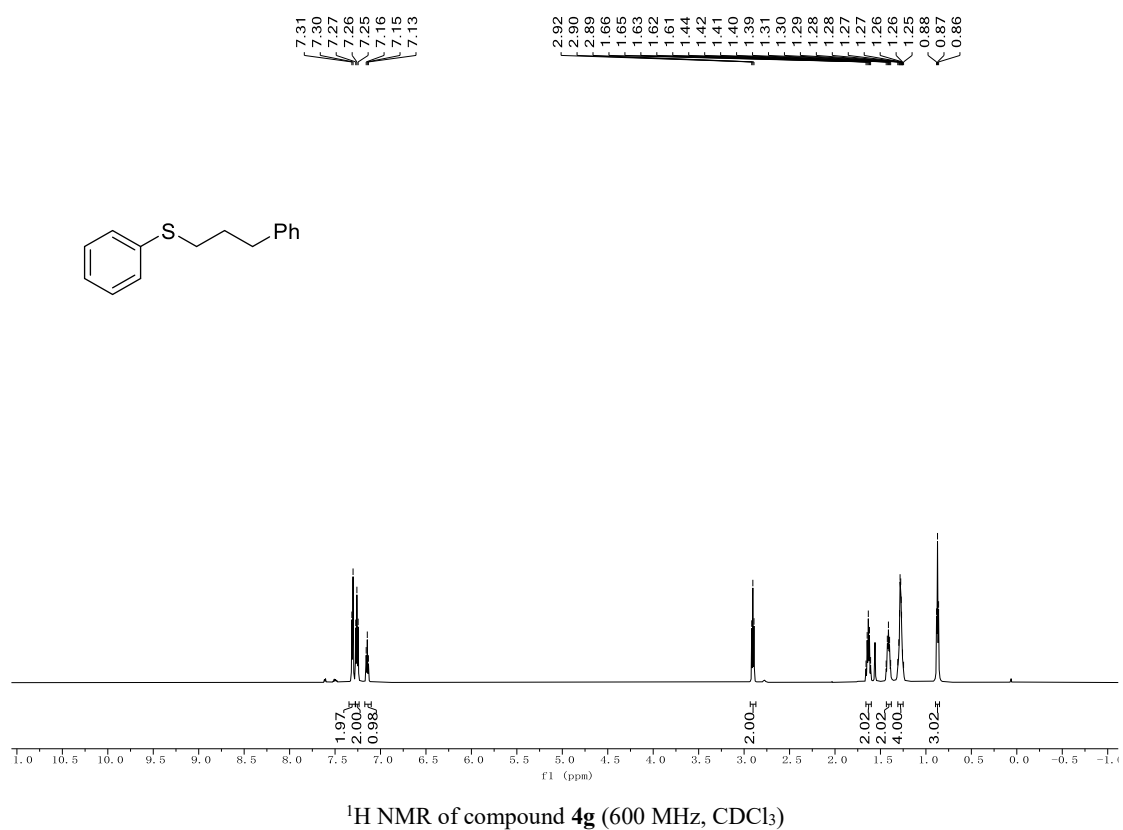

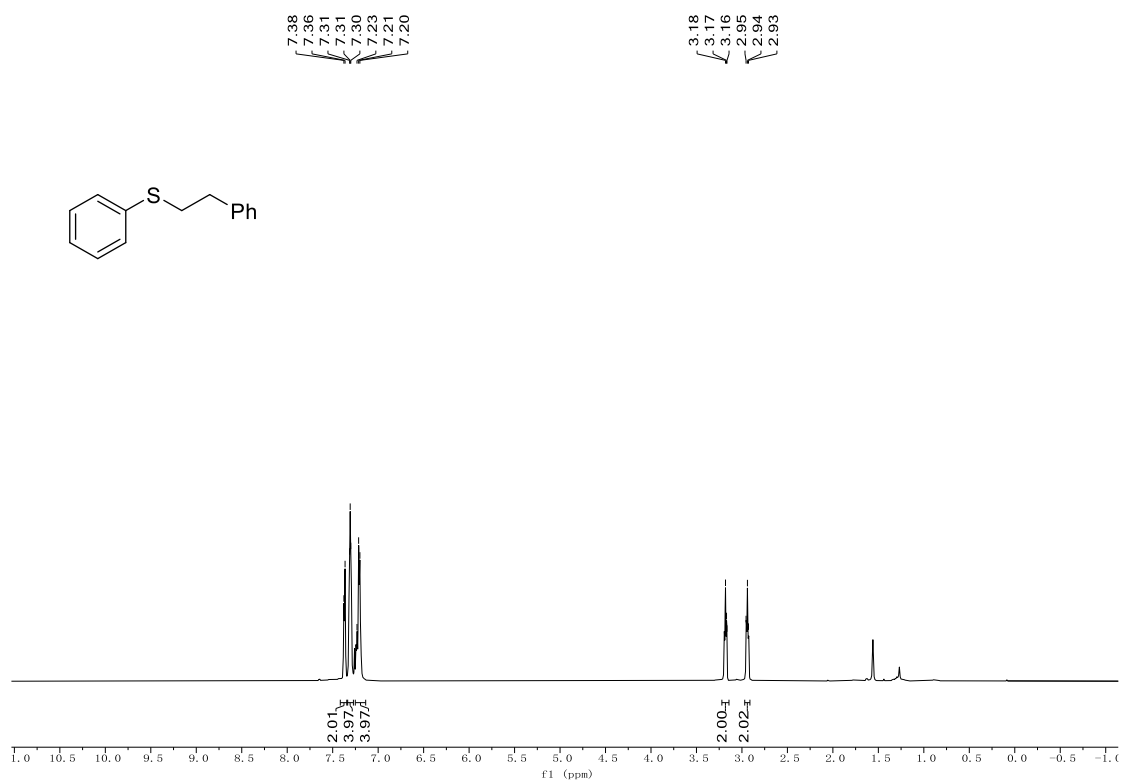

<sup>1</sup>H NMR of compound **4h** (600 MHz, CDCl<sub>3</sub>)

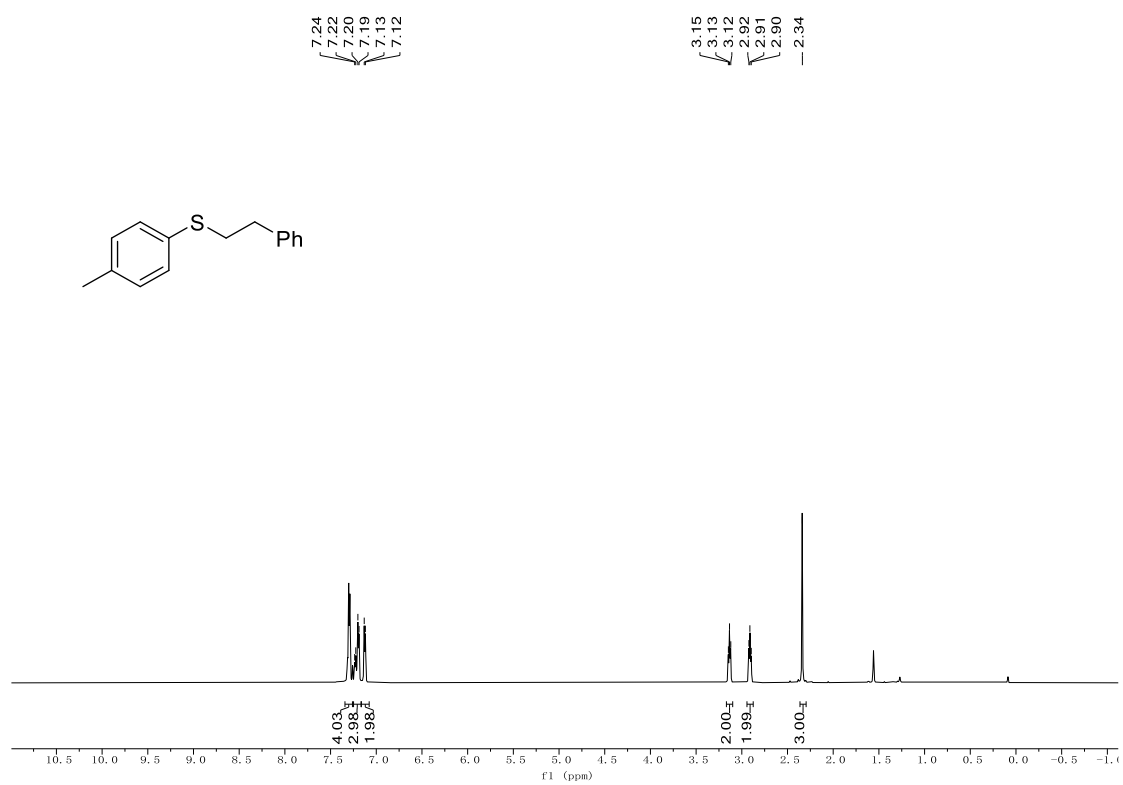

<sup>1</sup>H NMR of compound **4i** (600 MHz, CDCl<sub>3</sub>)

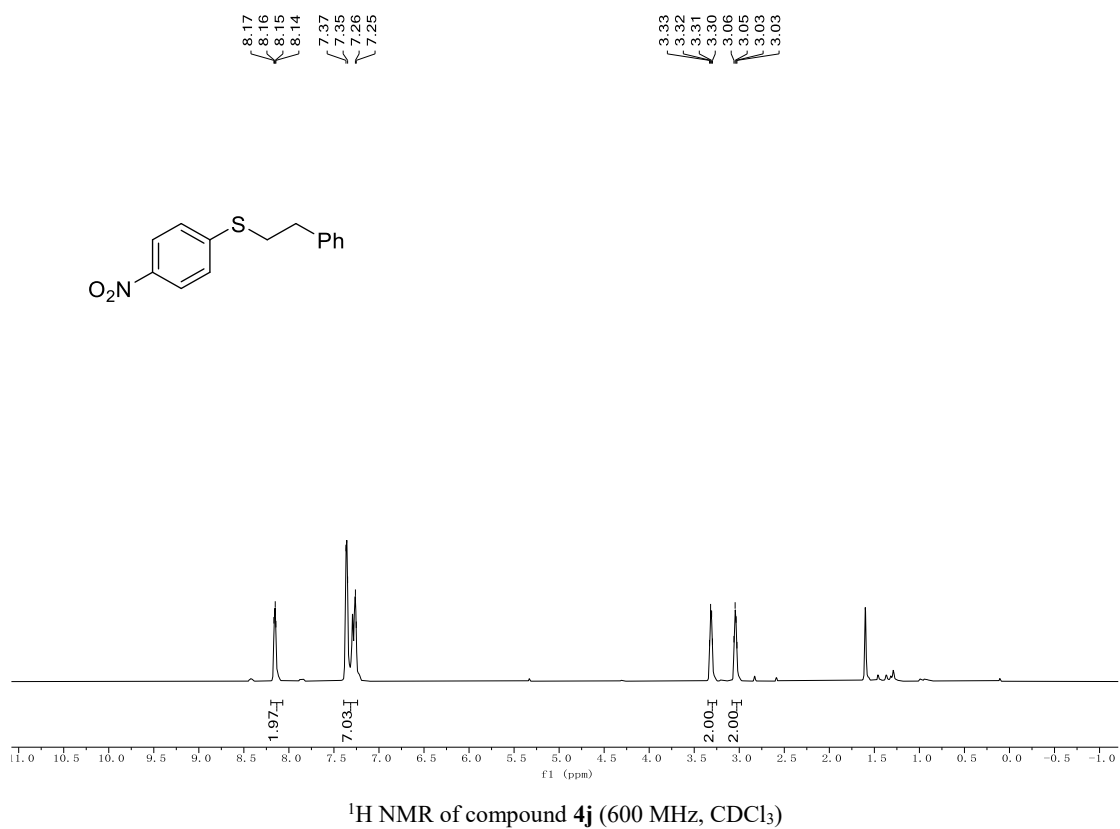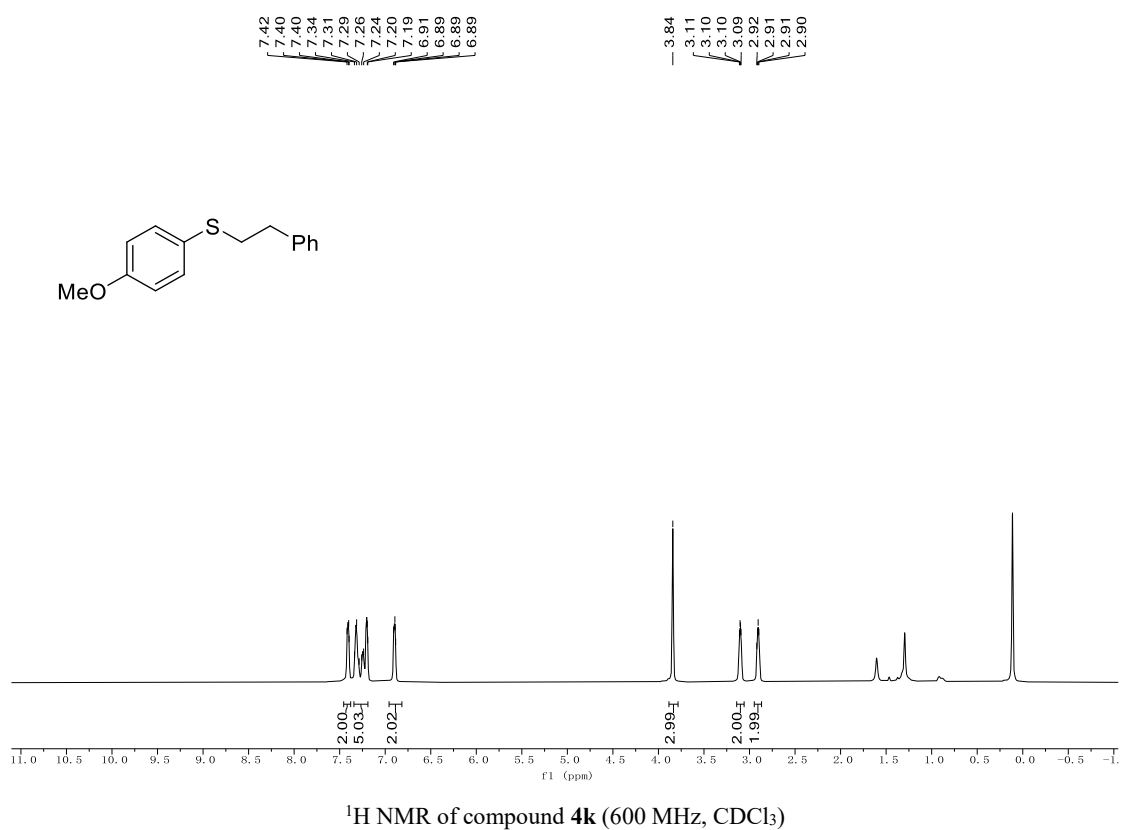



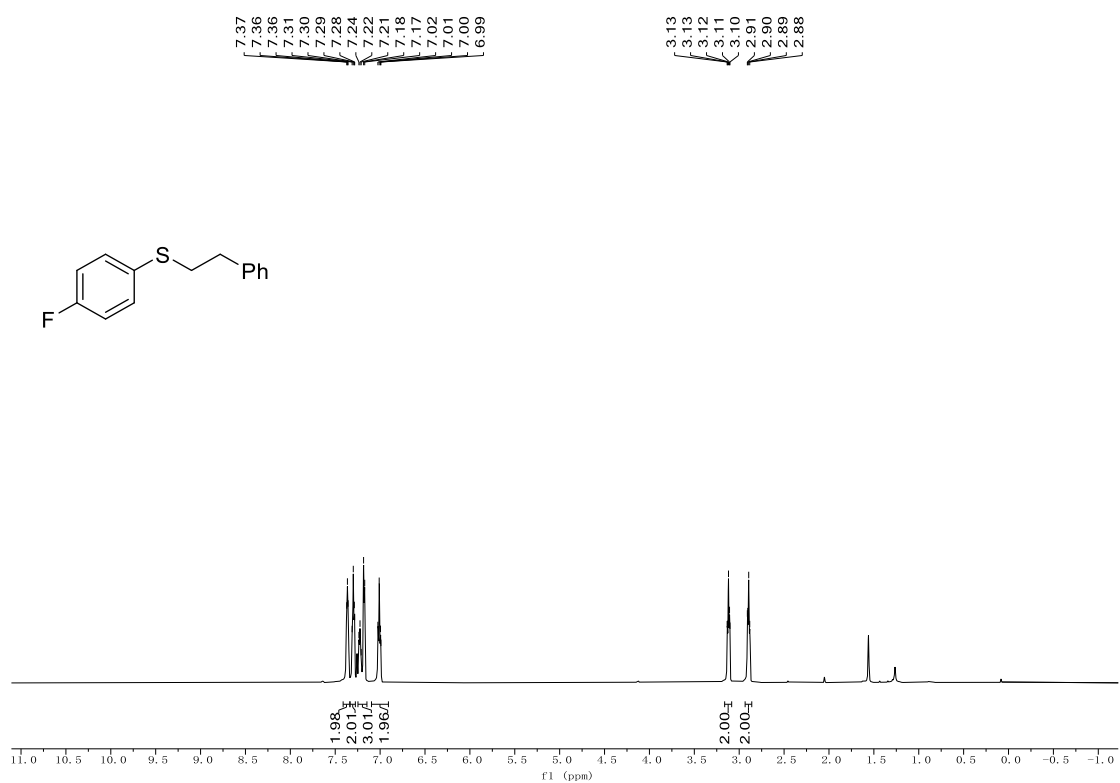

<sup>1</sup>H NMR of compound **4l** (600 MHz, CDCl<sub>3</sub>)

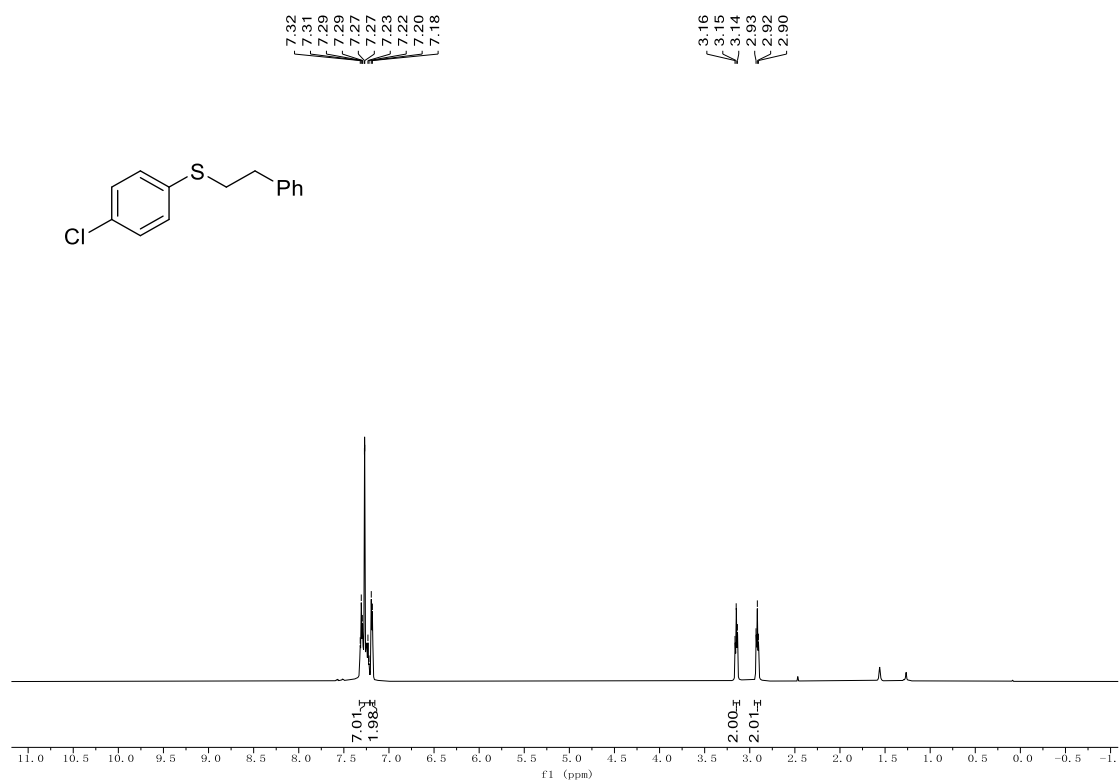

<sup>1</sup>H NMR of compound **4m** (600 MHz, CDCl<sub>3</sub>)

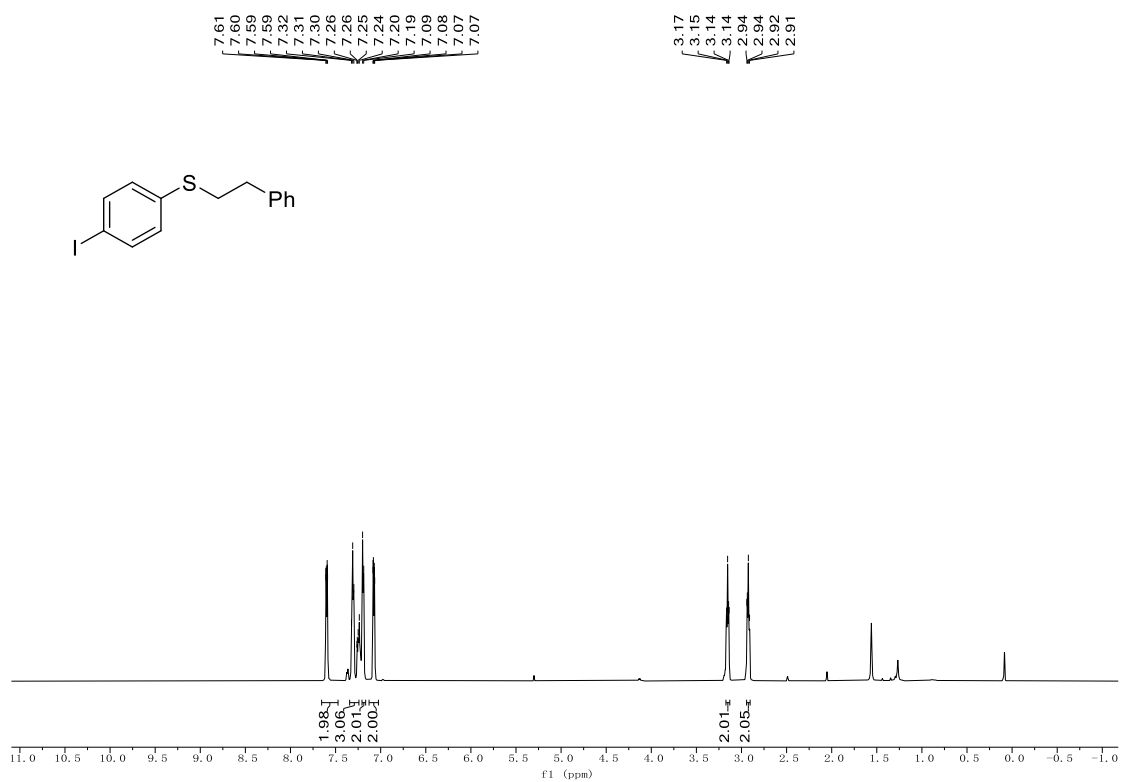

<sup>1</sup>H NMR of compound **4n** (600 MHz, CDCl<sub>3</sub>)

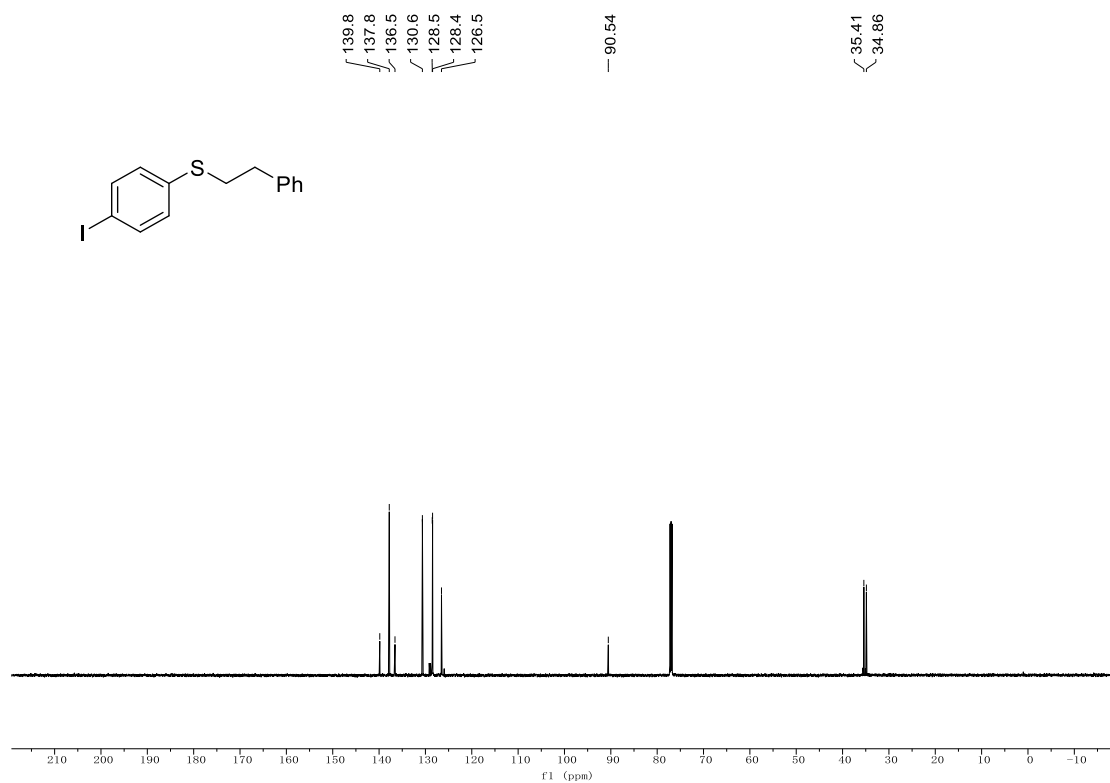

<sup>13</sup>C NMR of compound **4n** (151 MHz, CDCl<sub>3</sub>)

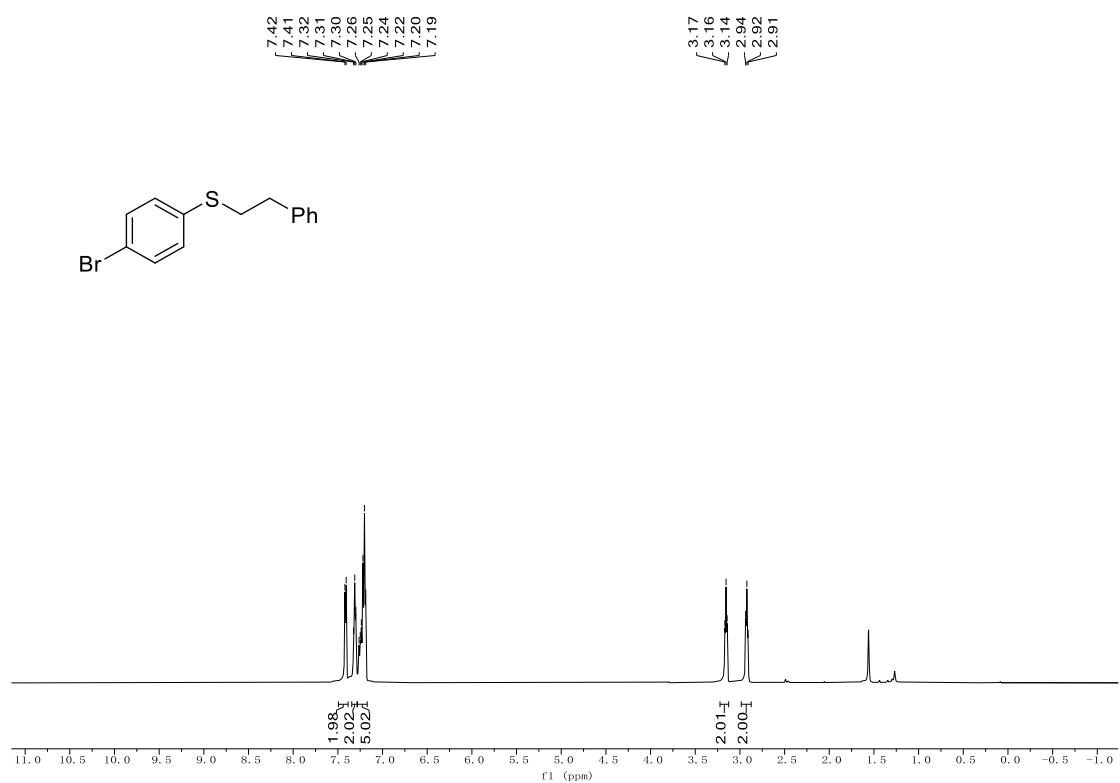

<sup>1</sup>H NMR of compound **4o** (600 MHz, CDCl<sub>3</sub>)

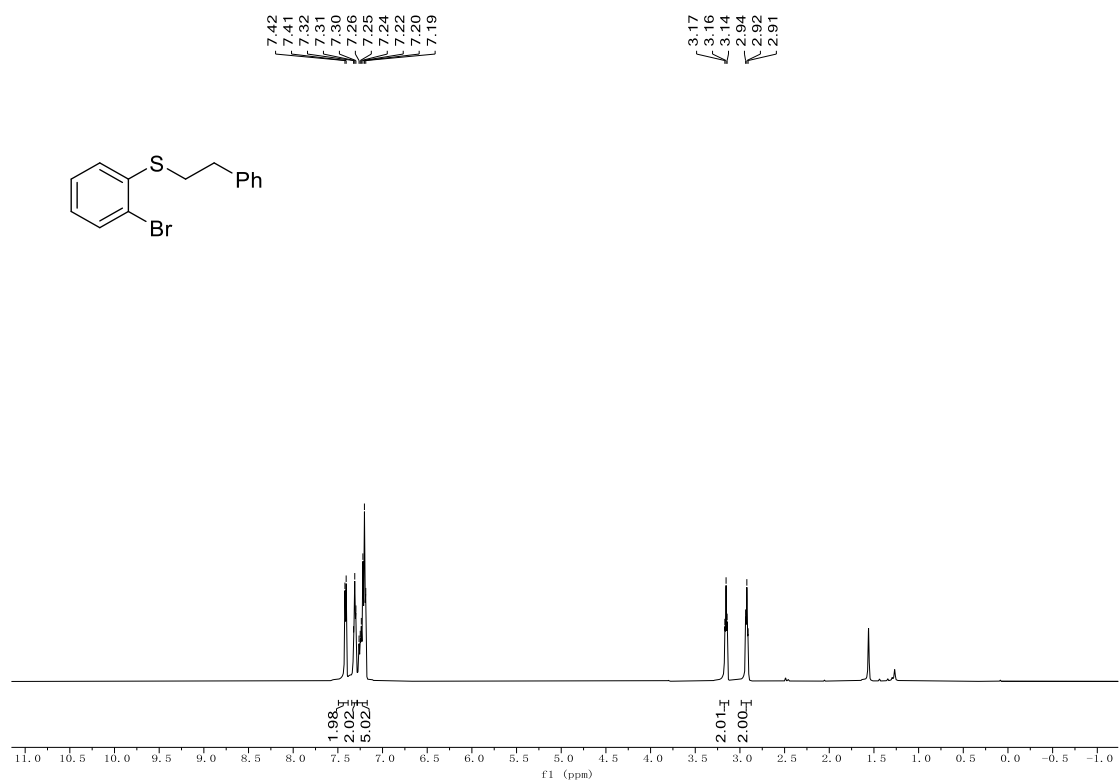

<sup>1</sup>H NMR of compound **4P** (600 MHz, CDCl<sub>3</sub>)

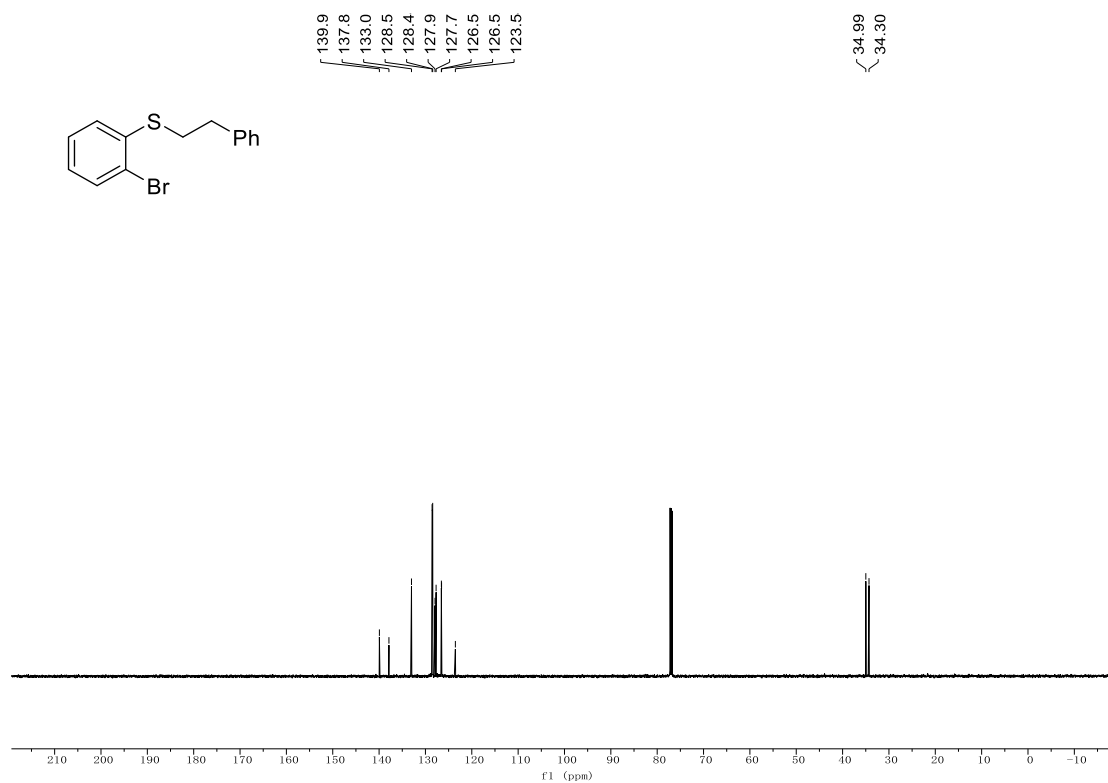

$^{13}\text{C}$  NMR of compound **4P** (600 MHz,  $\text{CDCl}_3$ )

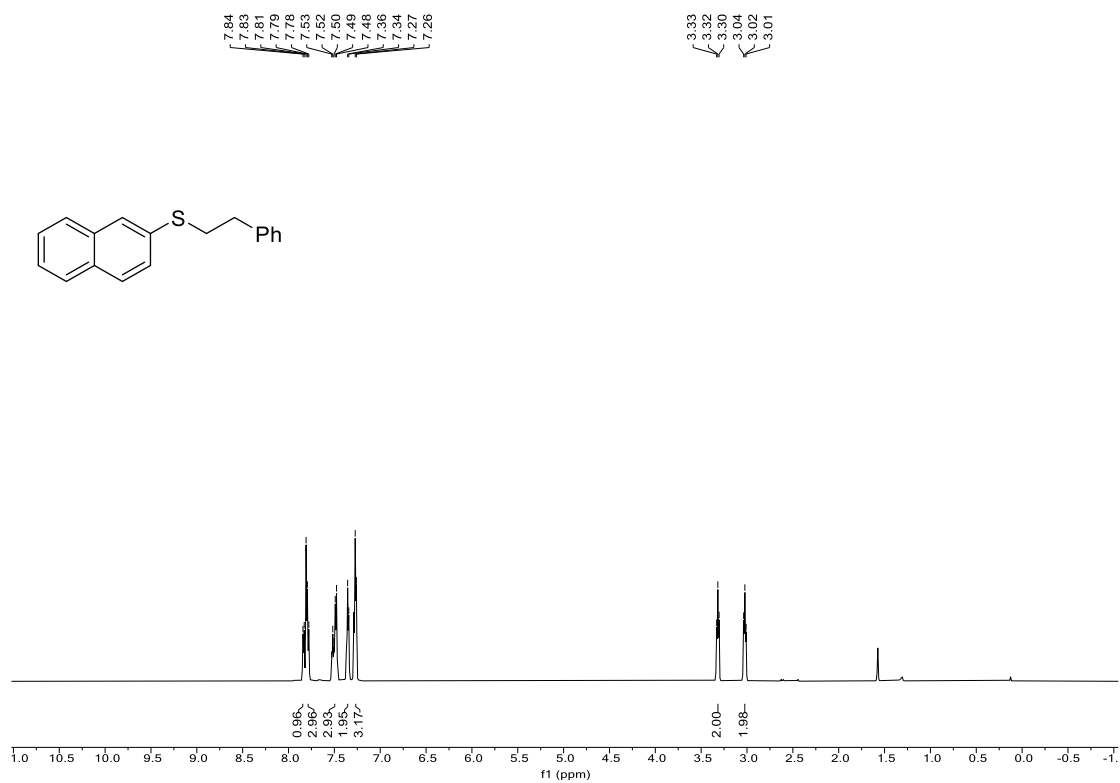

$^1\text{H}$  NMR of compound **4q** (600 MHz,  $\text{CDCl}_3$ )

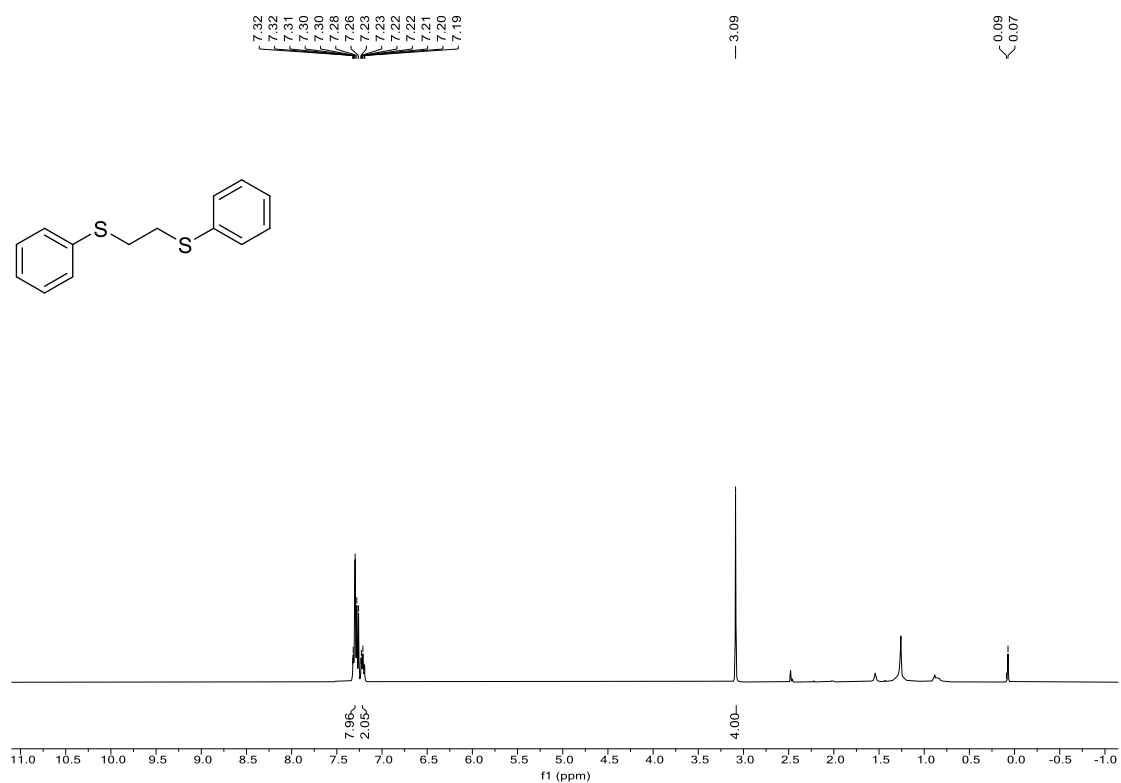

<sup>1</sup>H NMR of compound **4r** (400 MHz, CDCl<sub>3</sub>)

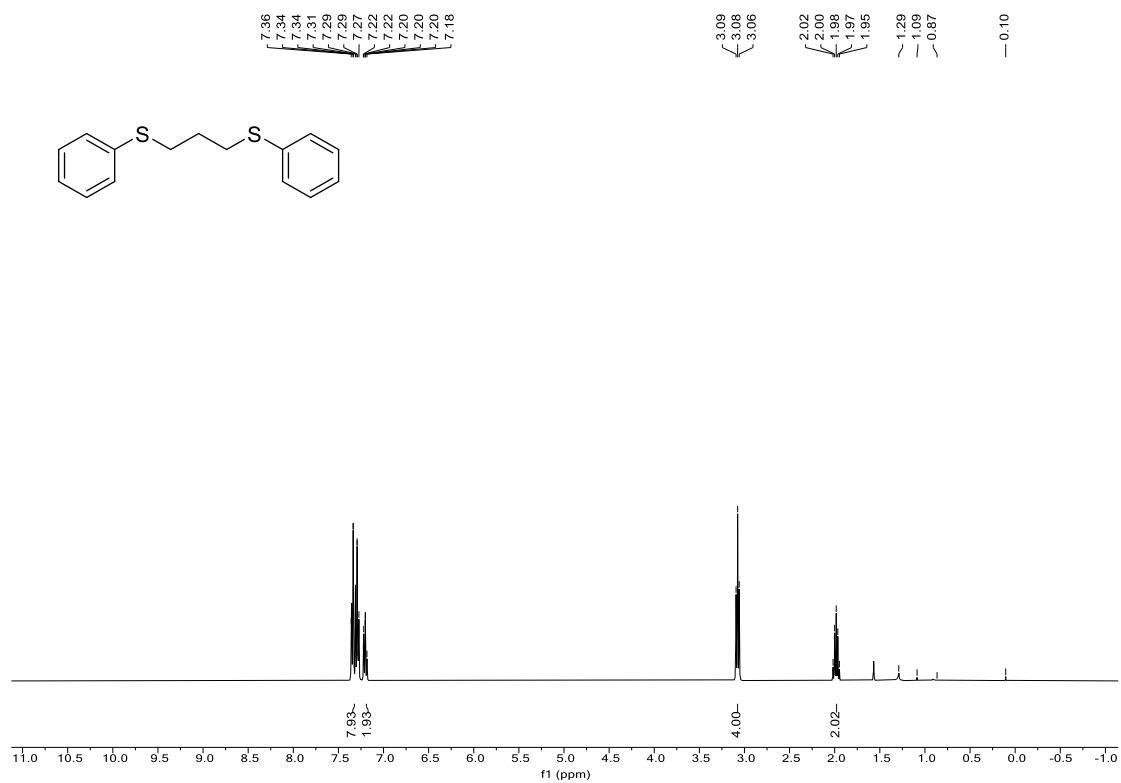

<sup>1</sup>H NMR of compound **4s** (400 MHz, CDCl<sub>3</sub>)

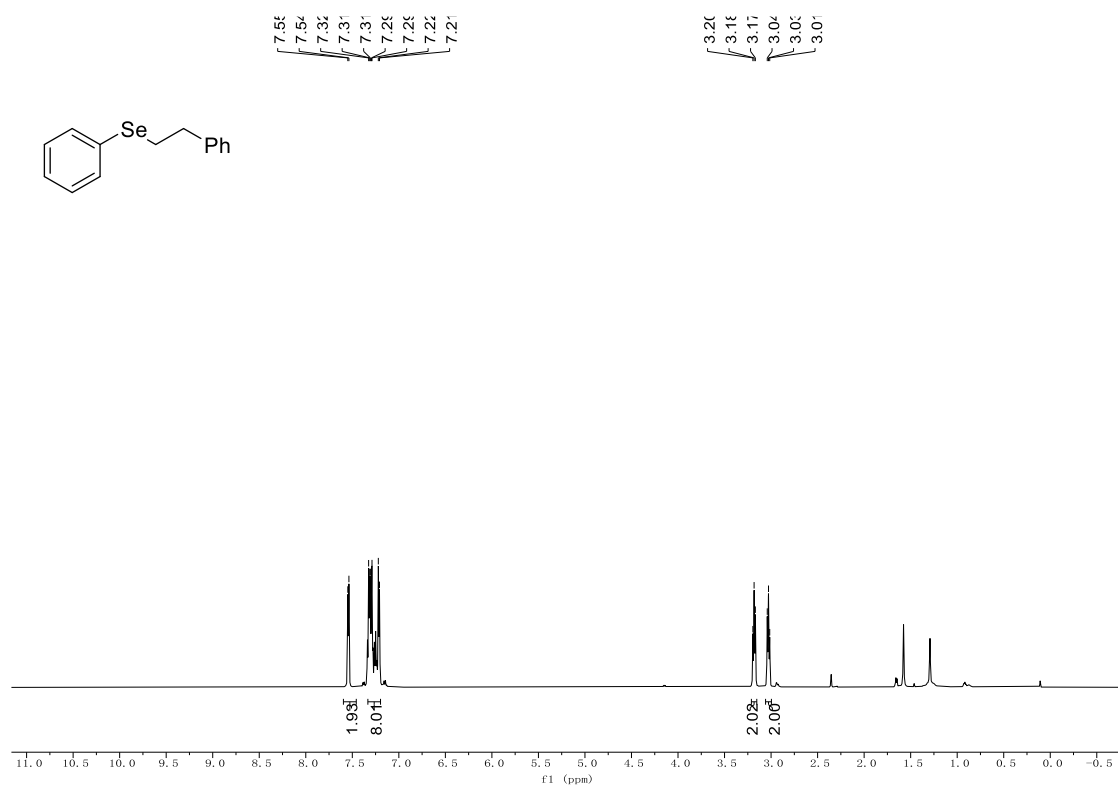

<sup>1</sup>H NMR of compound **4t** (600 MHz, CDCl<sub>3</sub>)

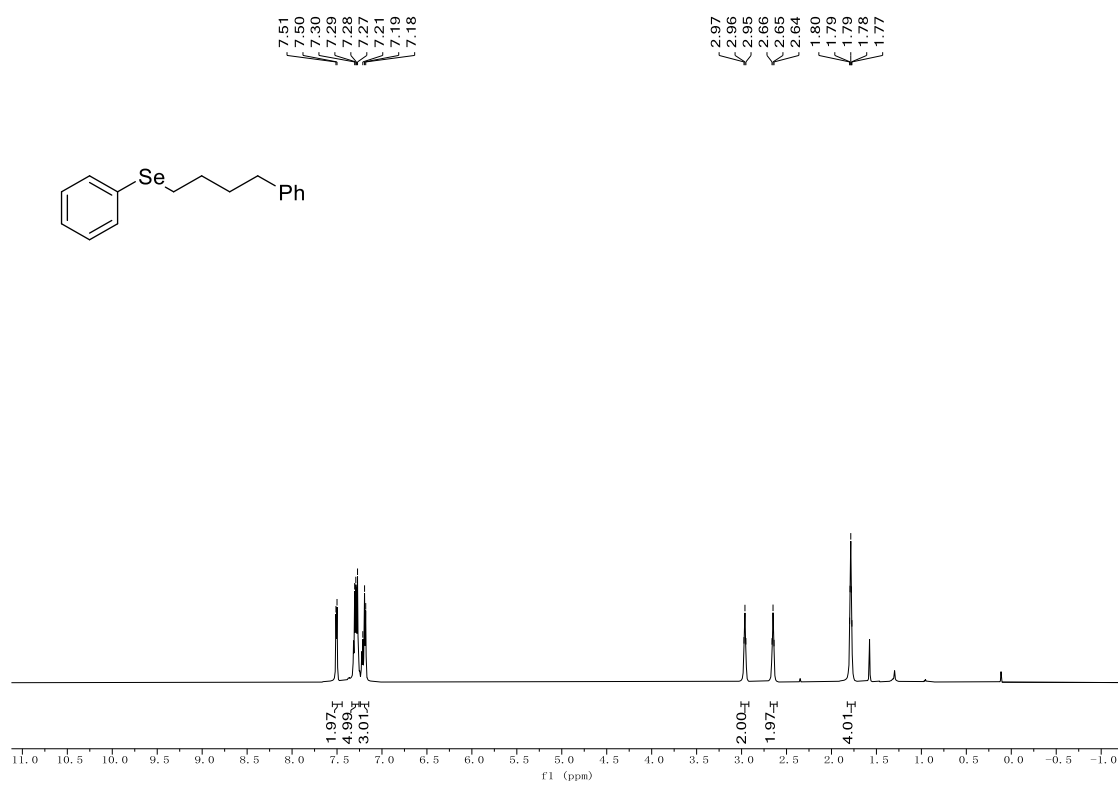

<sup>1</sup>H NMR of compound **4u** (600 MHz, CDCl<sub>3</sub>)

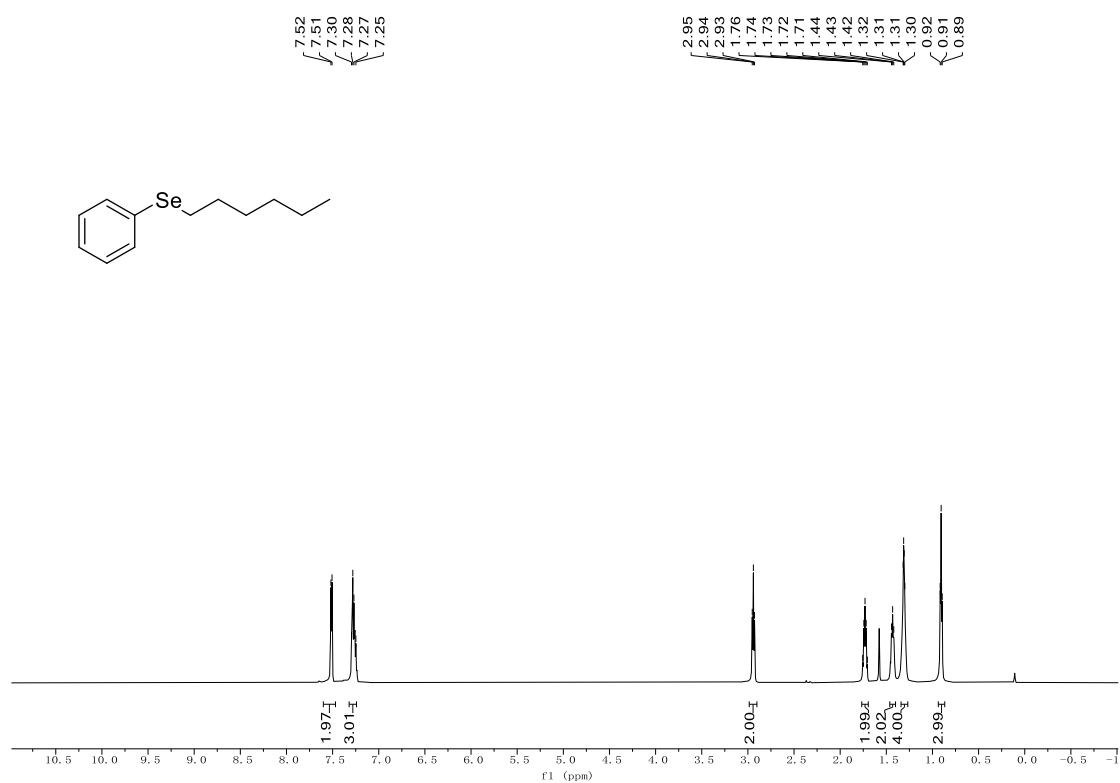

<sup>1</sup>H NMR of compound **4v** (600 MHz, CDCl<sub>3</sub>)

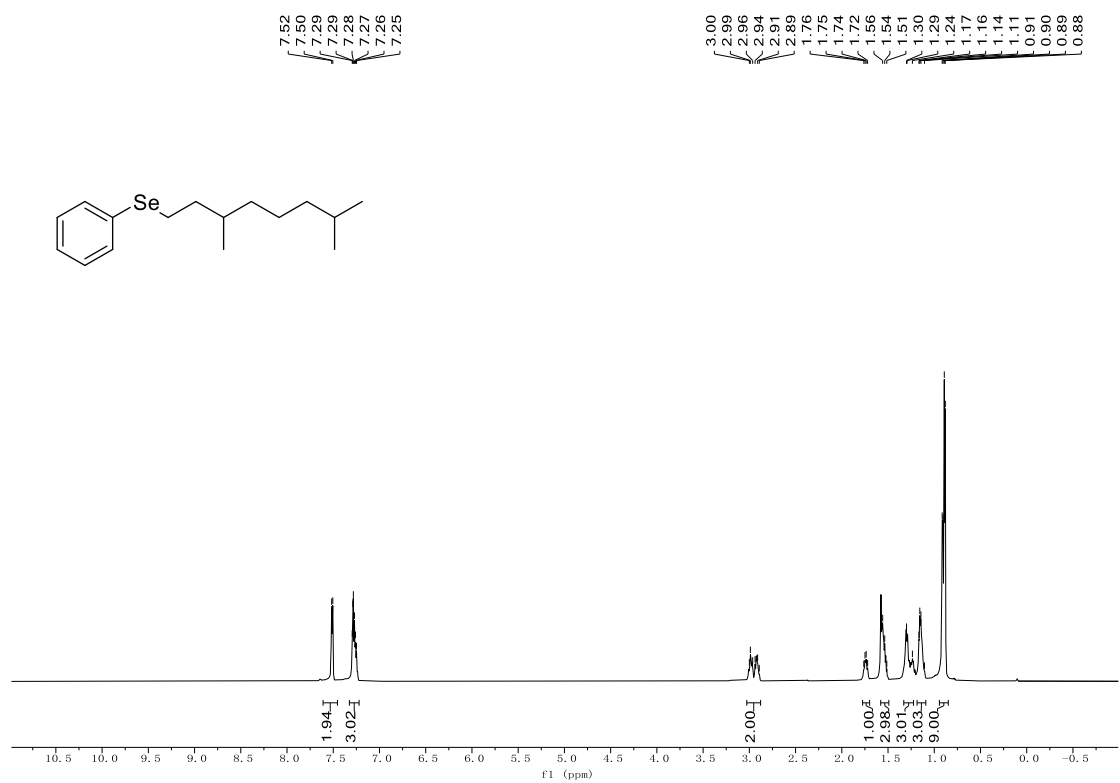

<sup>1</sup>H NMR of compound **4w** (600 MHz, CDCl<sub>3</sub>)

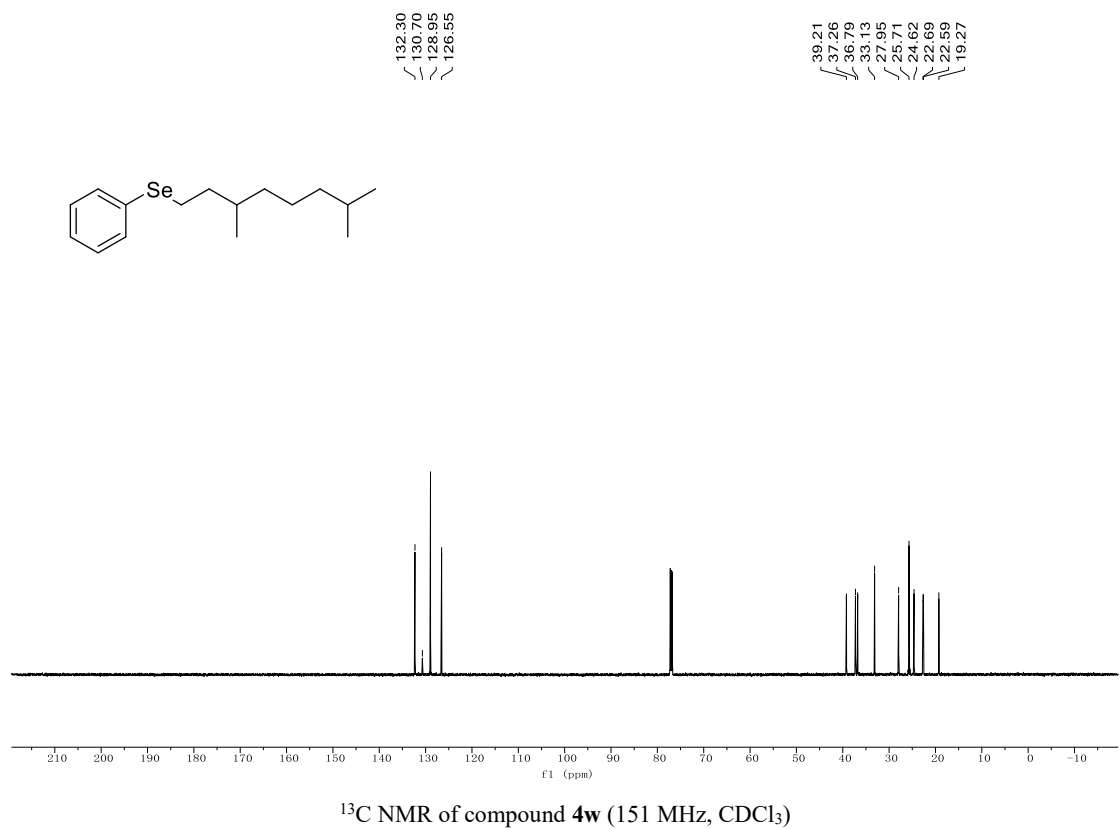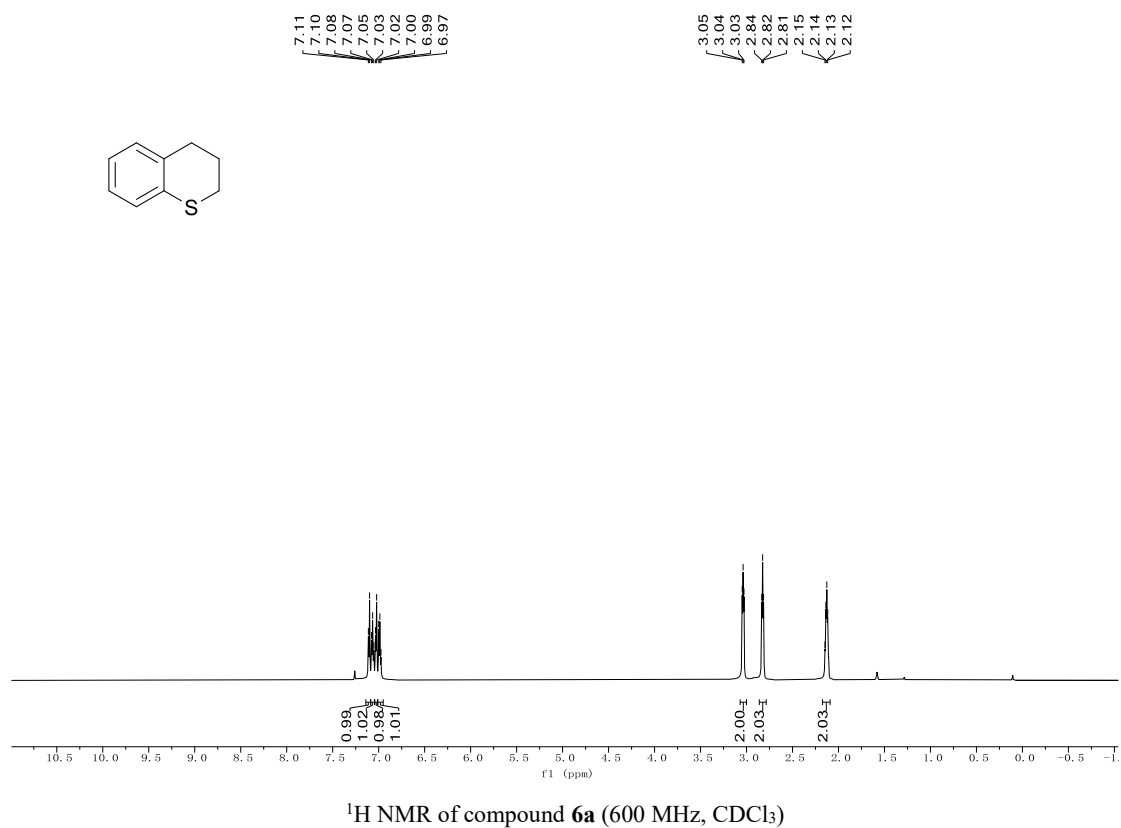



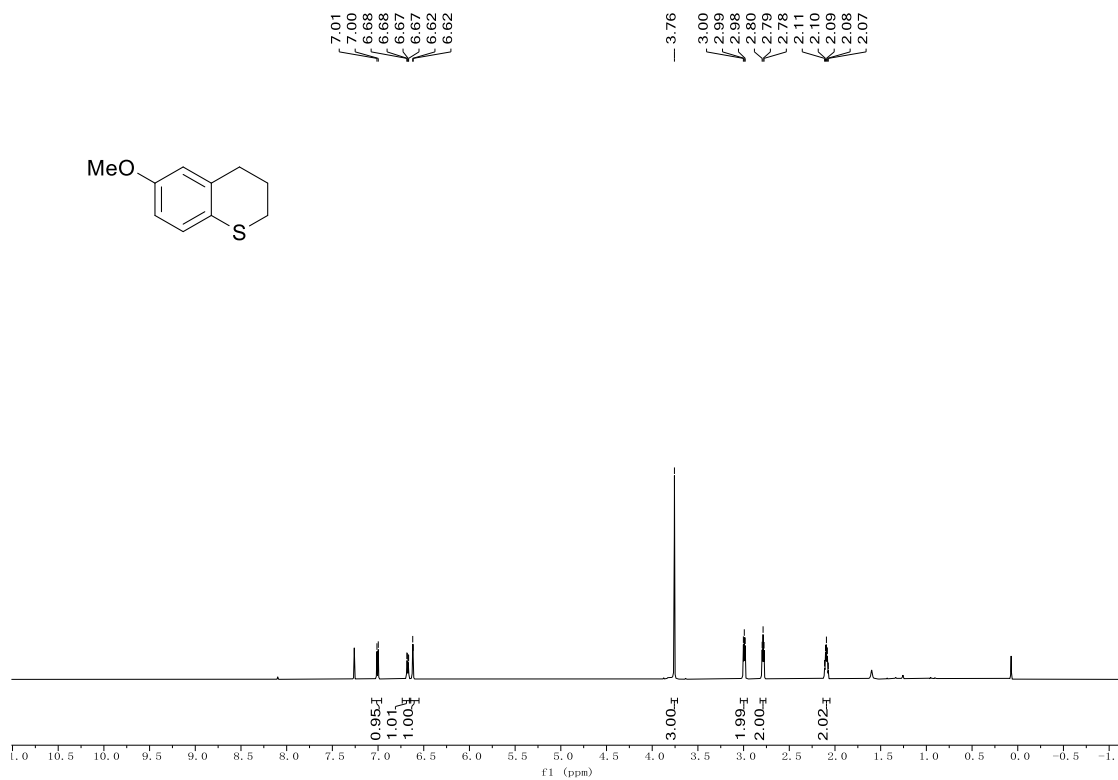

<sup>1</sup>H NMR of compound **6b** (600 MHz, CDCl<sub>3</sub>)

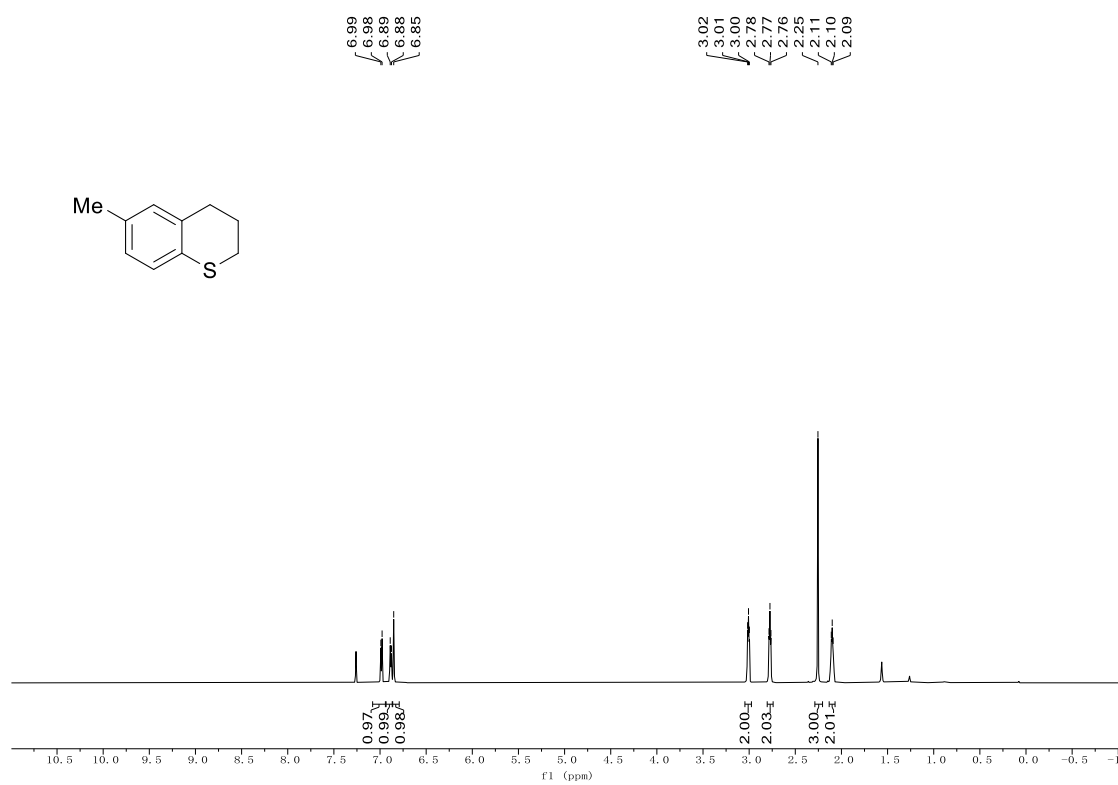

<sup>1</sup>H NMR of compound **6c** (600 MHz, CDCl<sub>3</sub>)

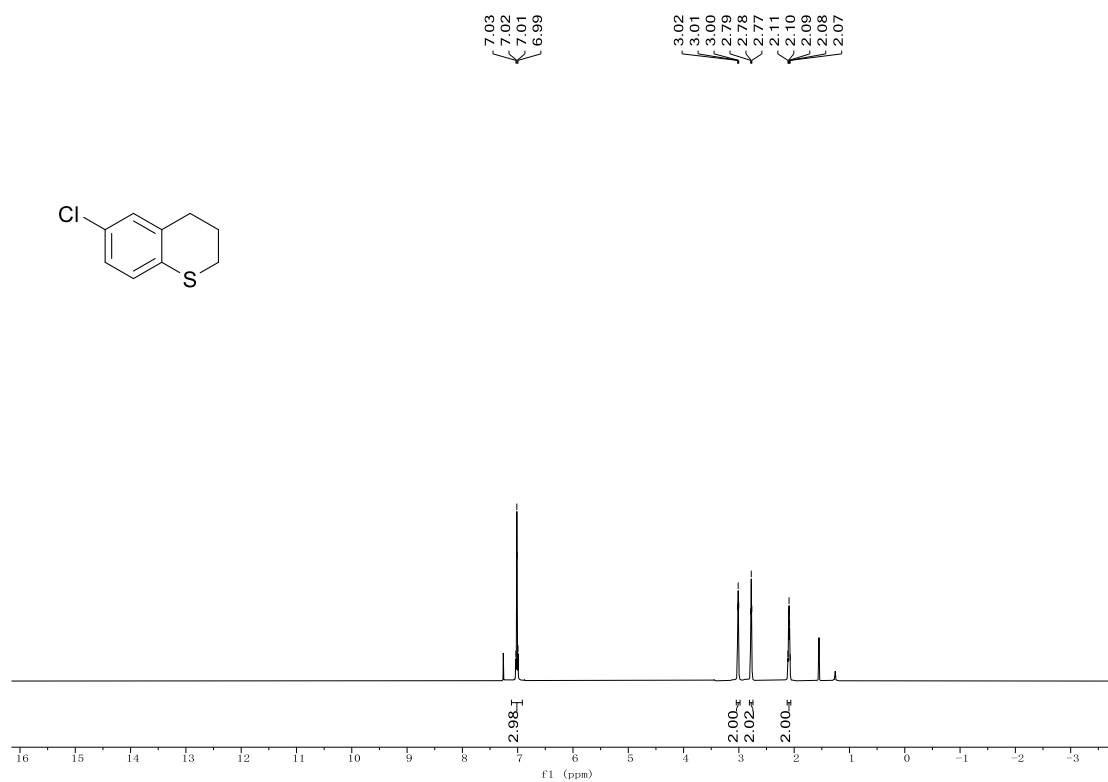

<sup>1</sup>H NMR of compound **6d** (600 MHz, CDCl<sub>3</sub>)

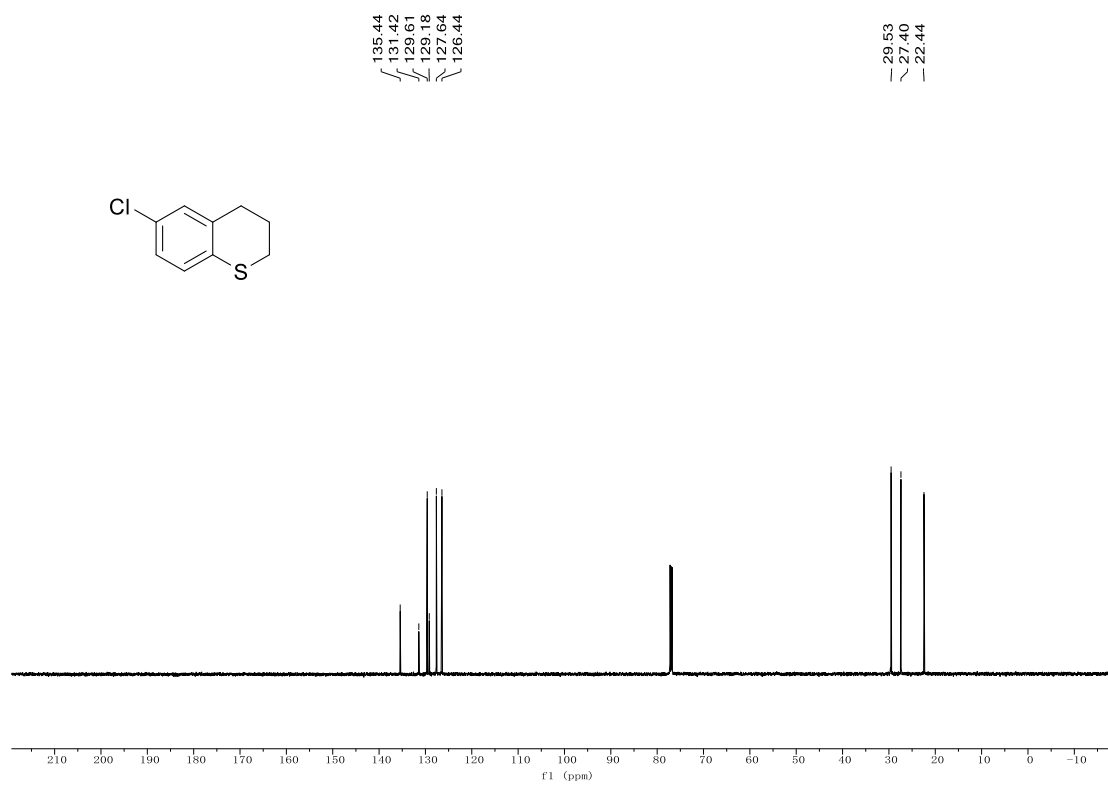

<sup>13</sup>C NMR of compound **6d** (151 MHz, CDCl<sub>3</sub>)

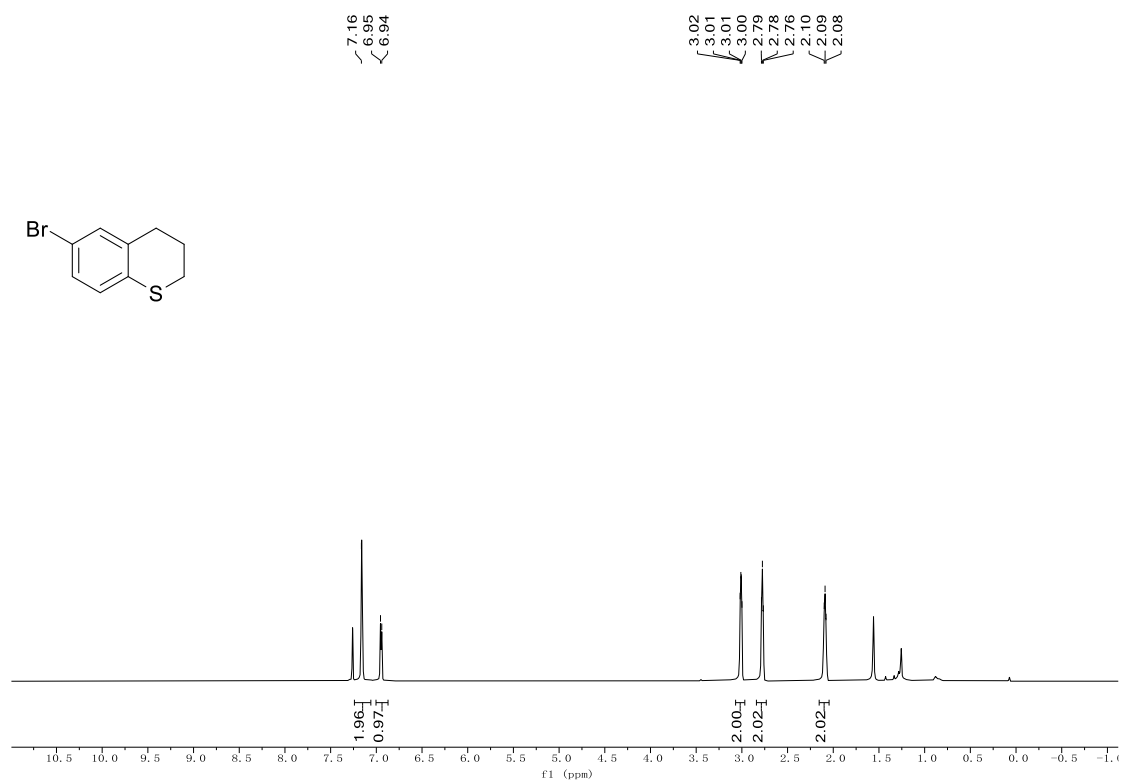

<sup>1</sup>H NMR of compound **6e** (600 MHz, CDCl<sub>3</sub>)

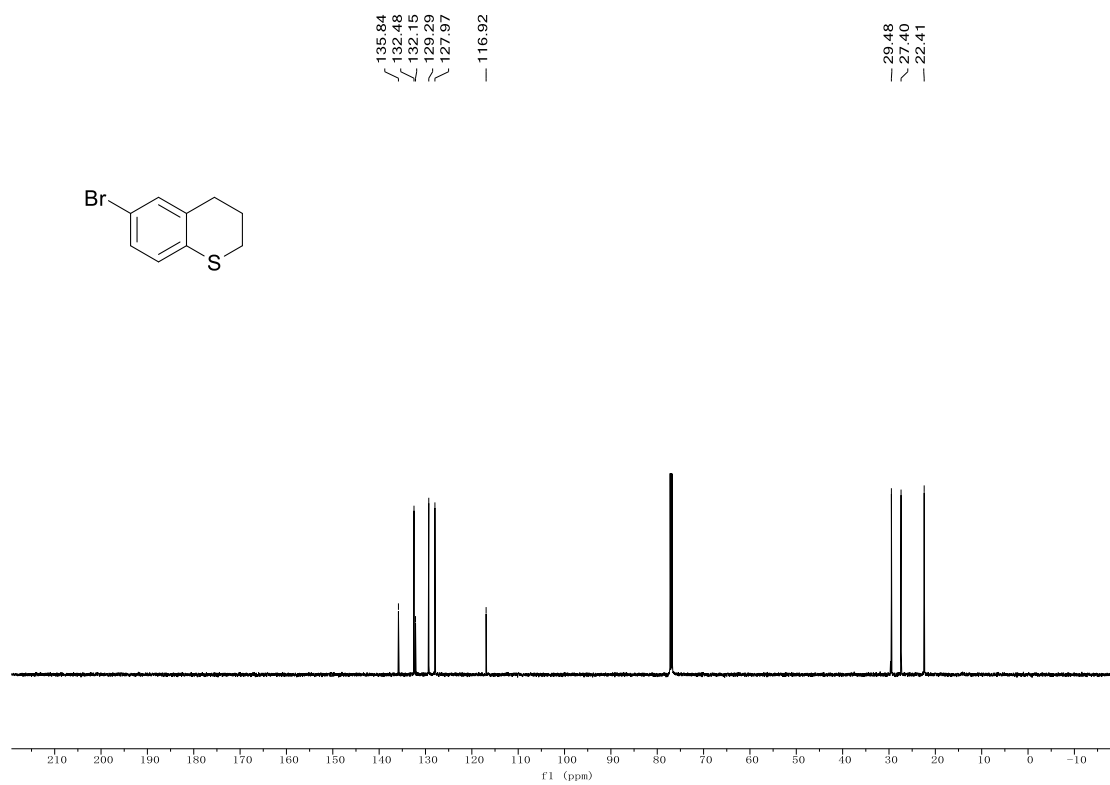

<sup>13</sup>C NMR of compound **6e** (151 MHz, CDCl<sub>3</sub>)

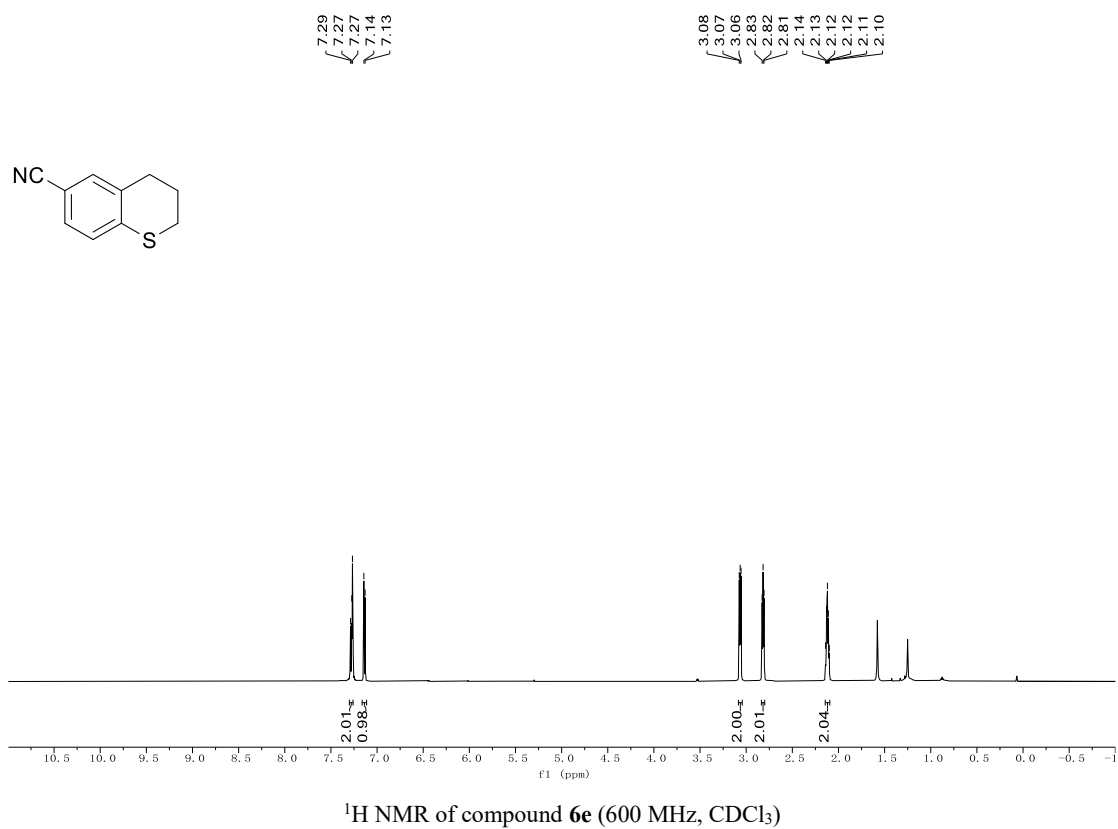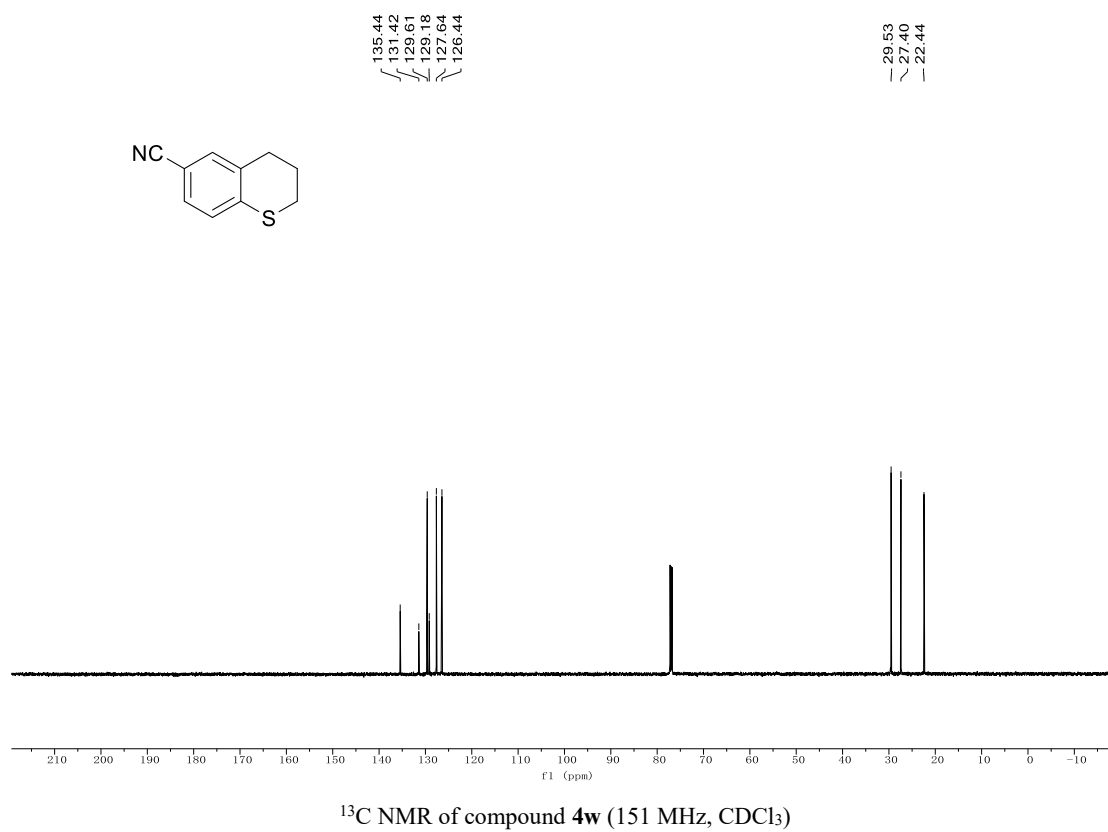

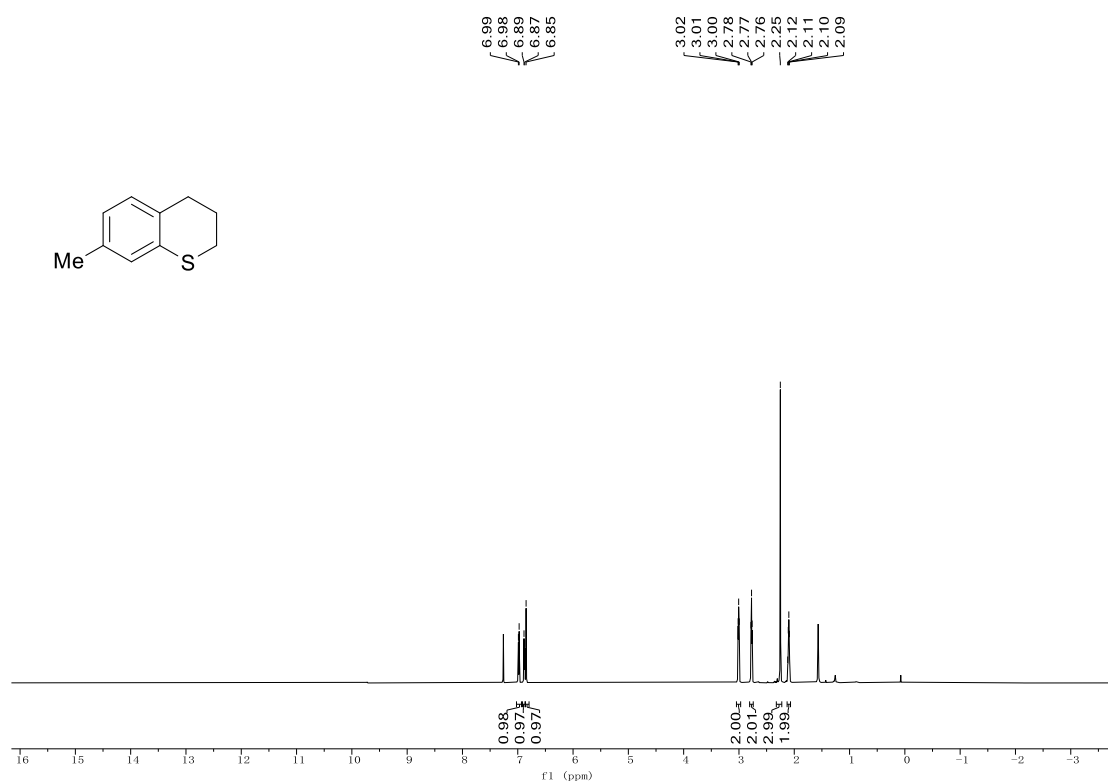

<sup>1</sup>H NMR of compound **6e** (600 MHz, CDCl<sub>3</sub>)

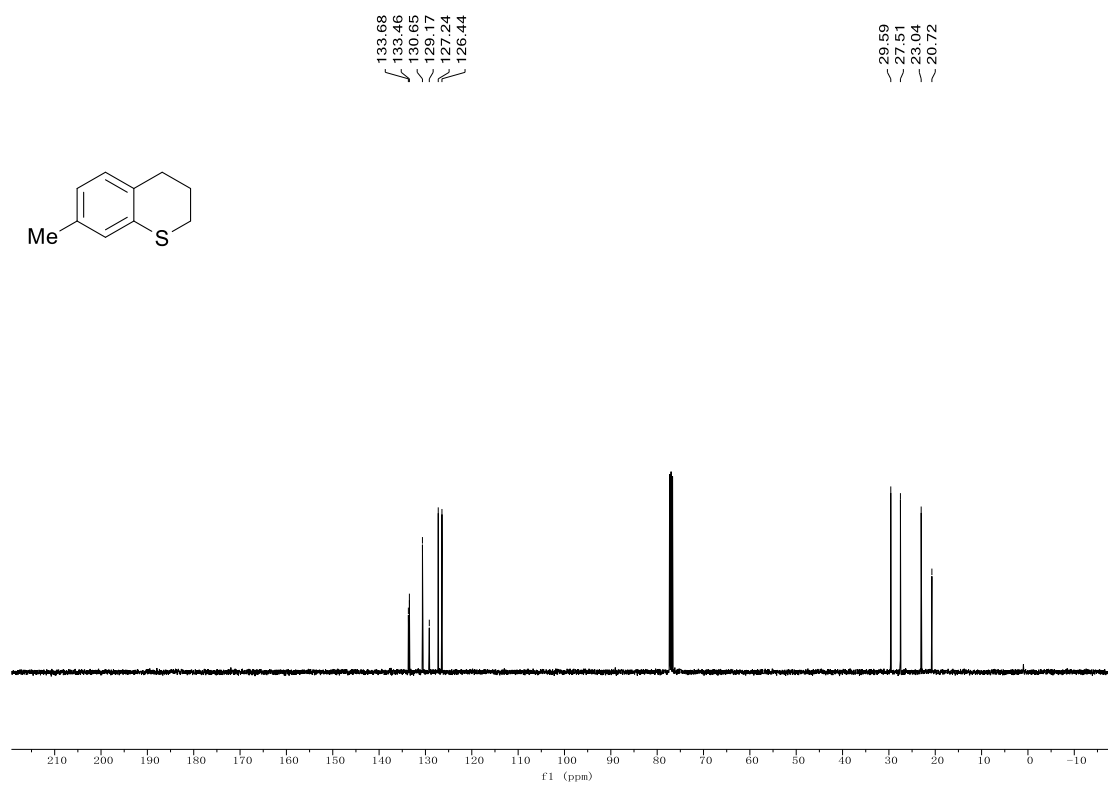

<sup>13</sup>C NMR of compound **4w** (151 MHz, CDCl<sub>3</sub>)

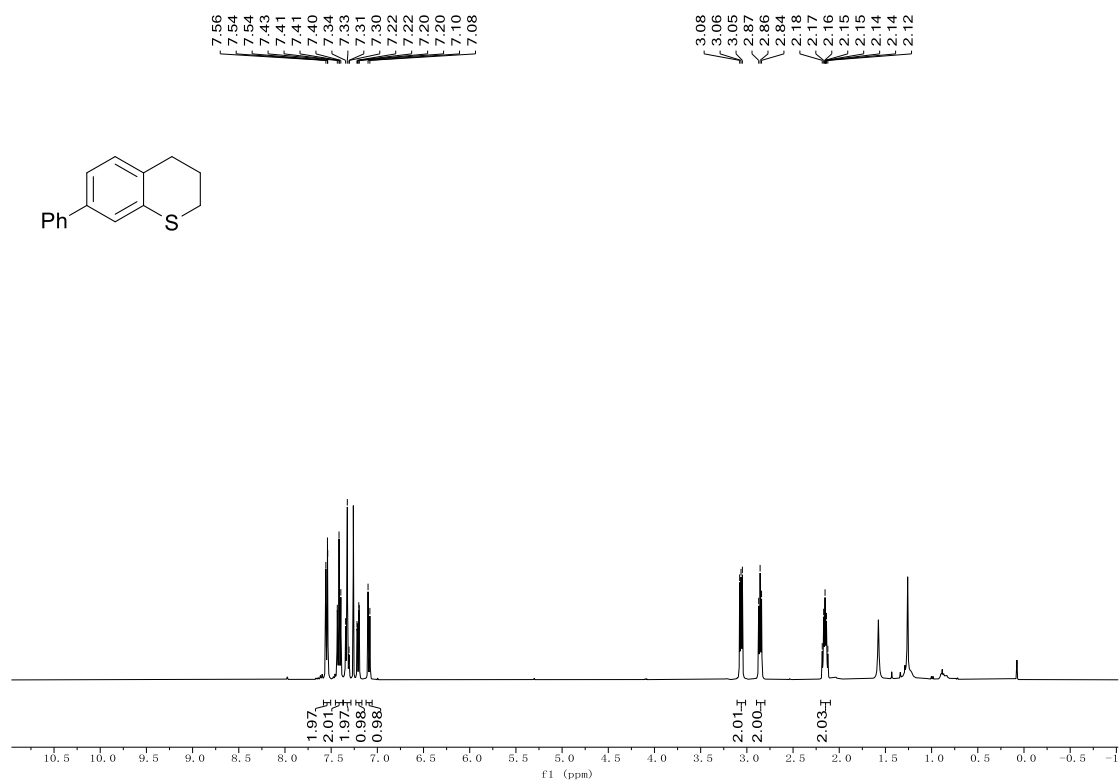

<sup>1</sup>H NMR of compound **6e** (600 MHz, CDCl<sub>3</sub>)

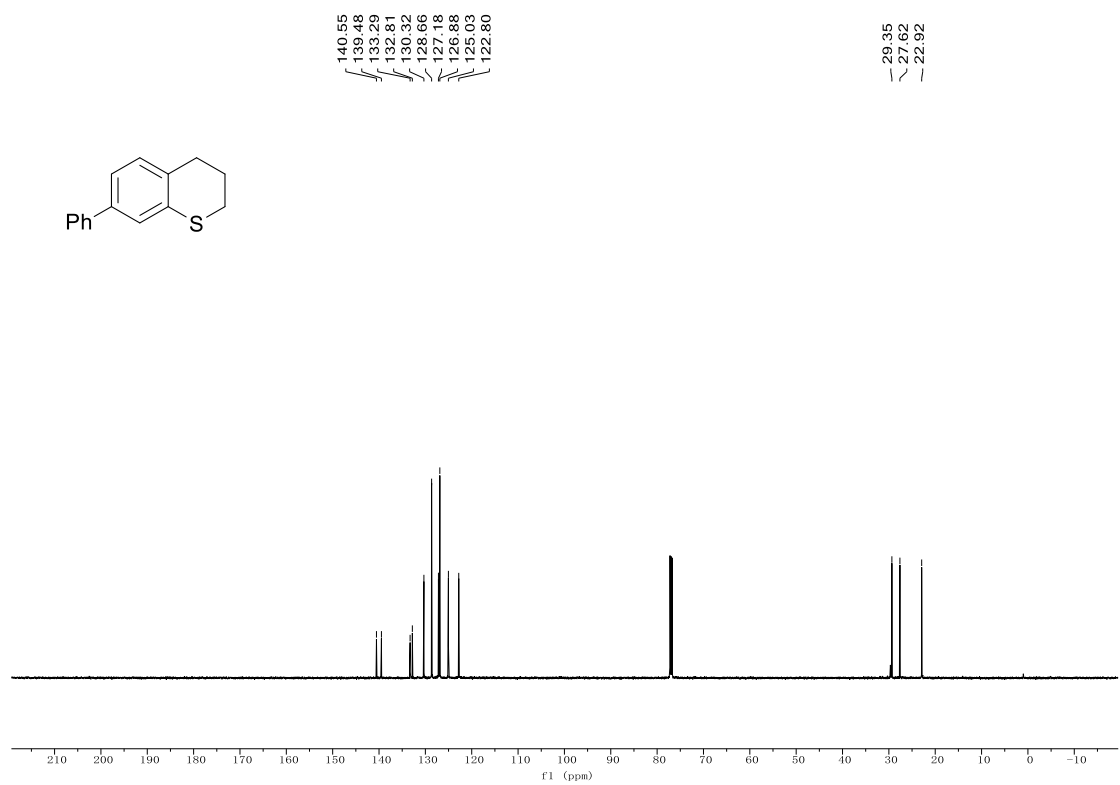

<sup>13</sup>C NMR of compound **4w** (151 MHz, CDCl<sub>3</sub>)

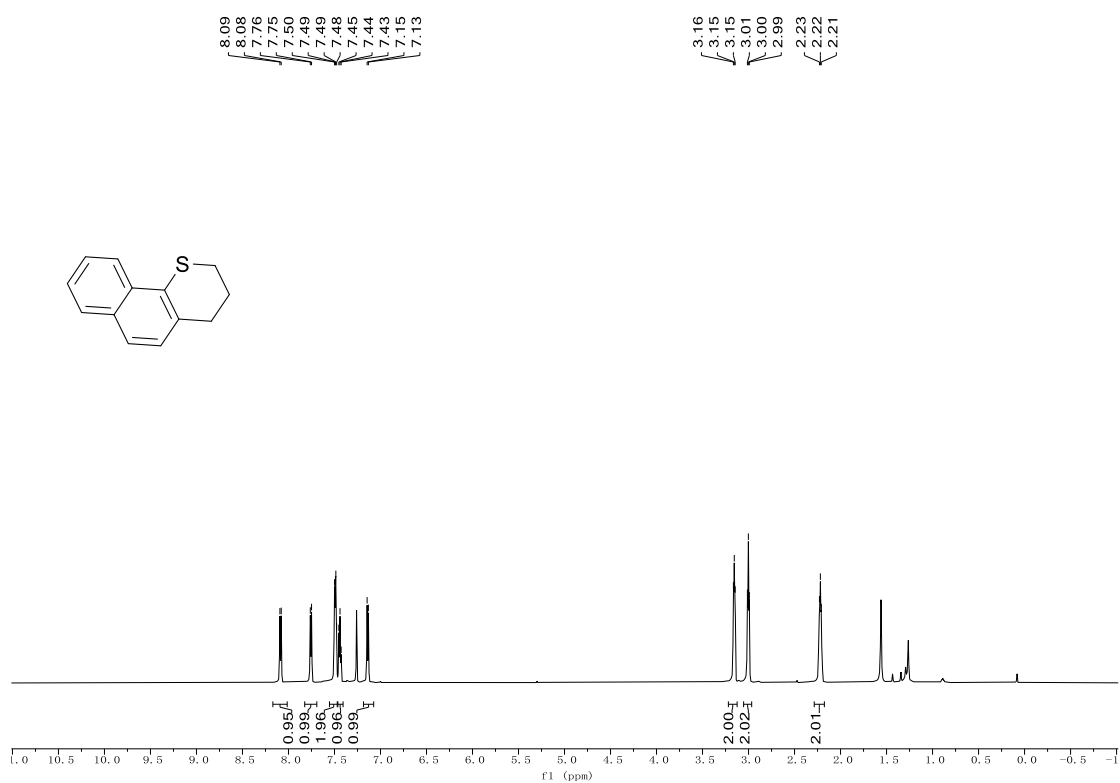

<sup>1</sup>H NMR of compound **6e** (600 MHz, CDCl<sub>3</sub>)

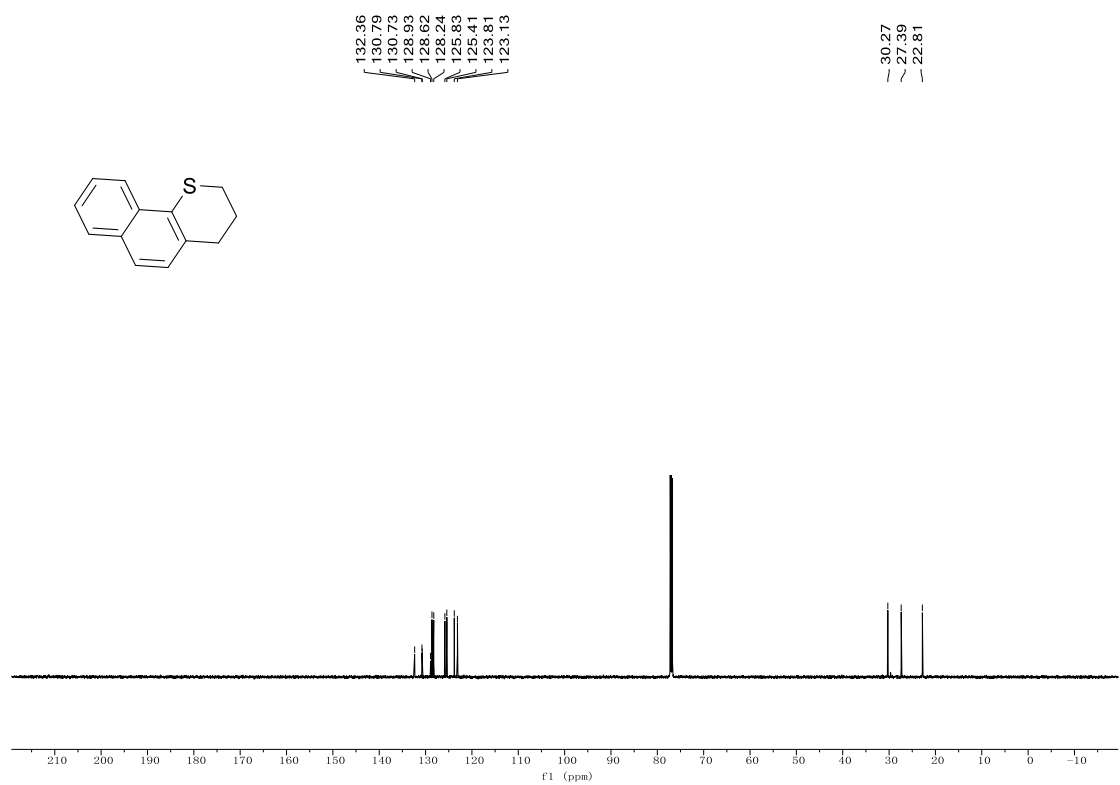

<sup>13</sup>C NMR of compound **4w** (151 MHz, CDCl<sub>3</sub>)

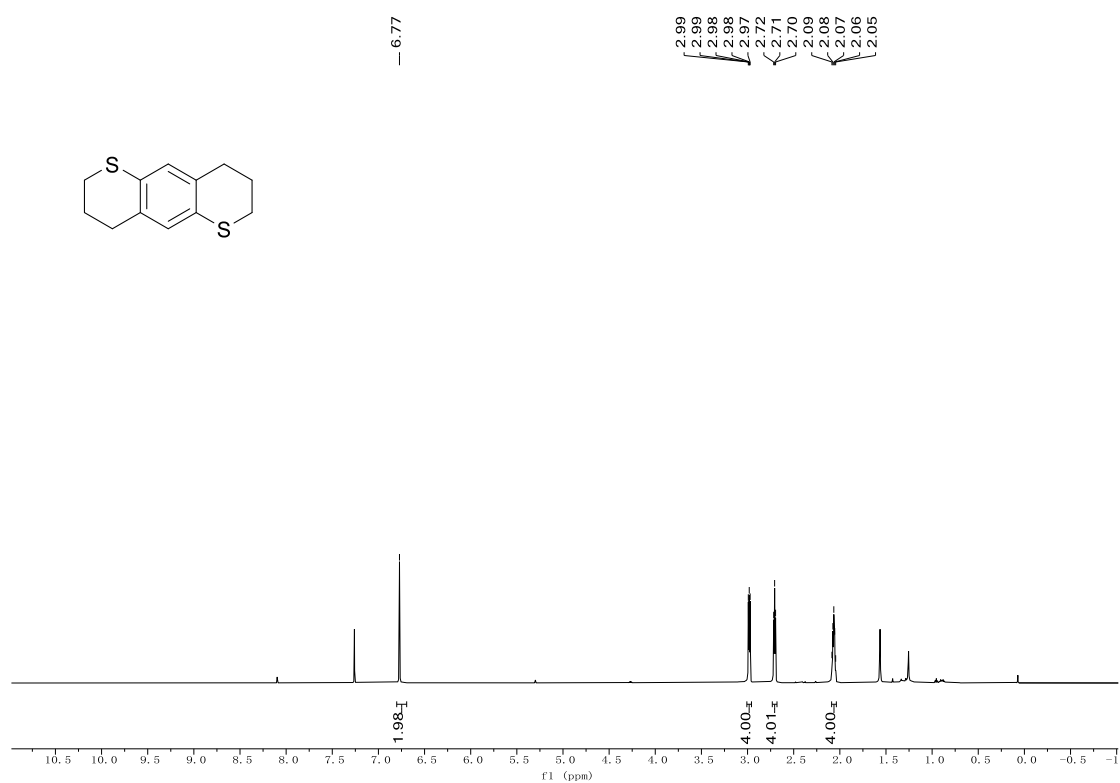

$^1\text{H}$  NMR of compound **6e** (600 MHz,  $\text{CDCl}_3$ )

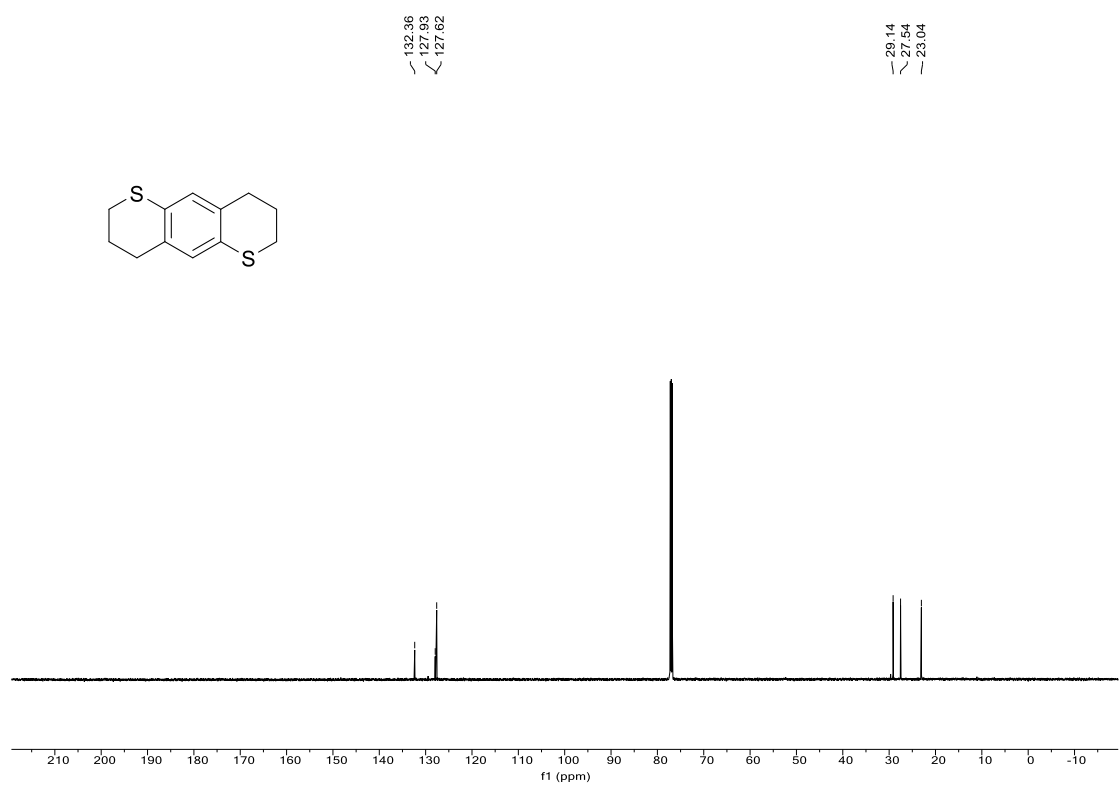

$^{13}\text{C}$  NMR of compound **4w** (151 MHz,  $\text{CDCl}_3$ )



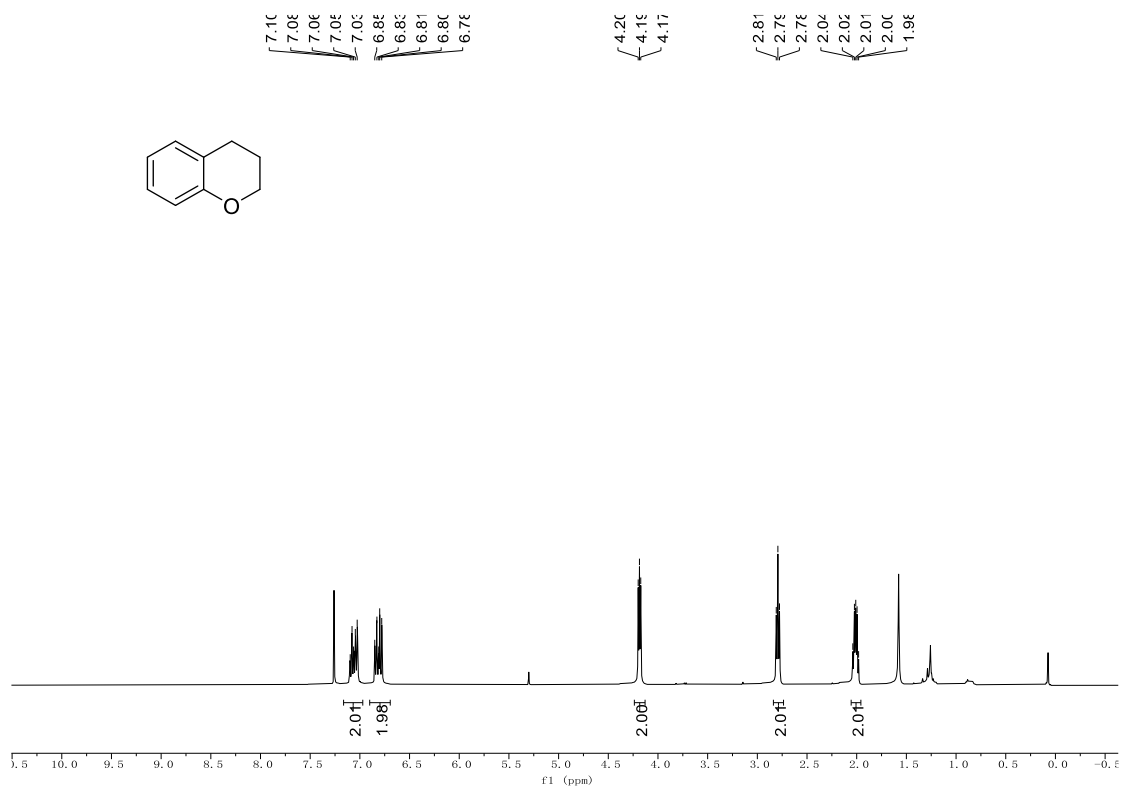

<sup>1</sup>H NMR of compound **6k** (400 MHz, CDCl<sub>3</sub>)

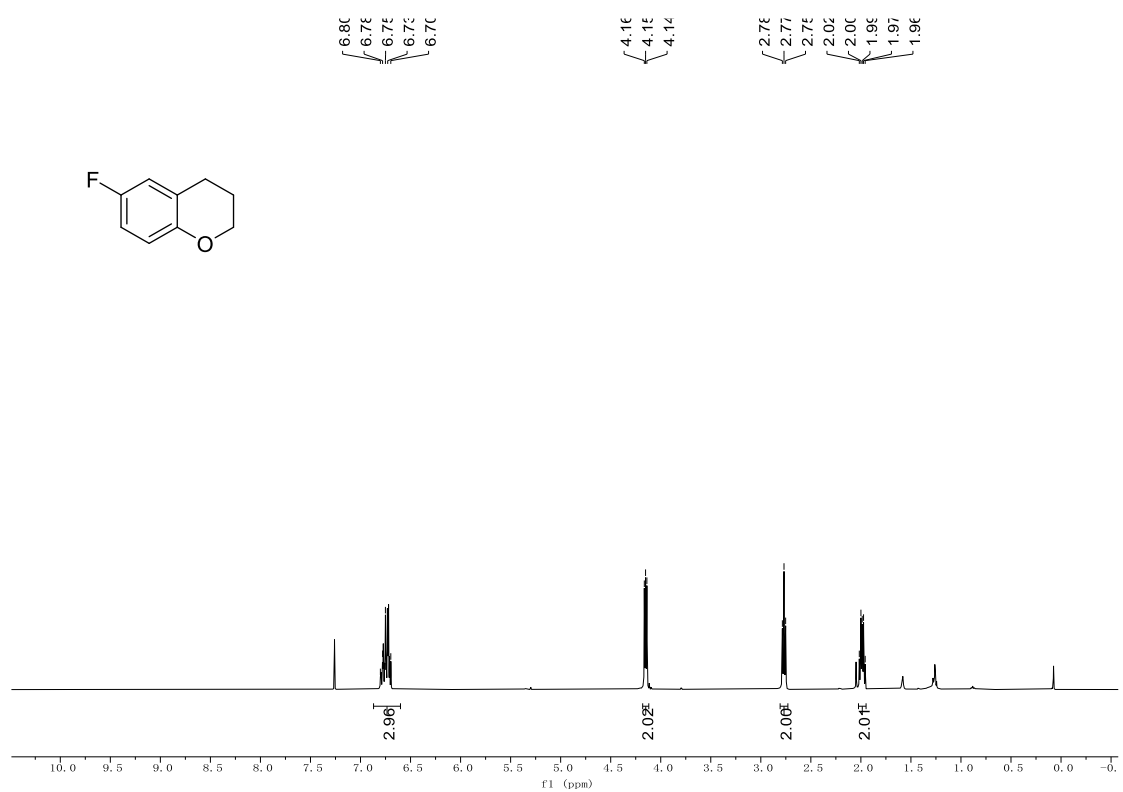

<sup>1</sup>H NMR of compound **6l** (400 MHz, CDCl<sub>3</sub>)

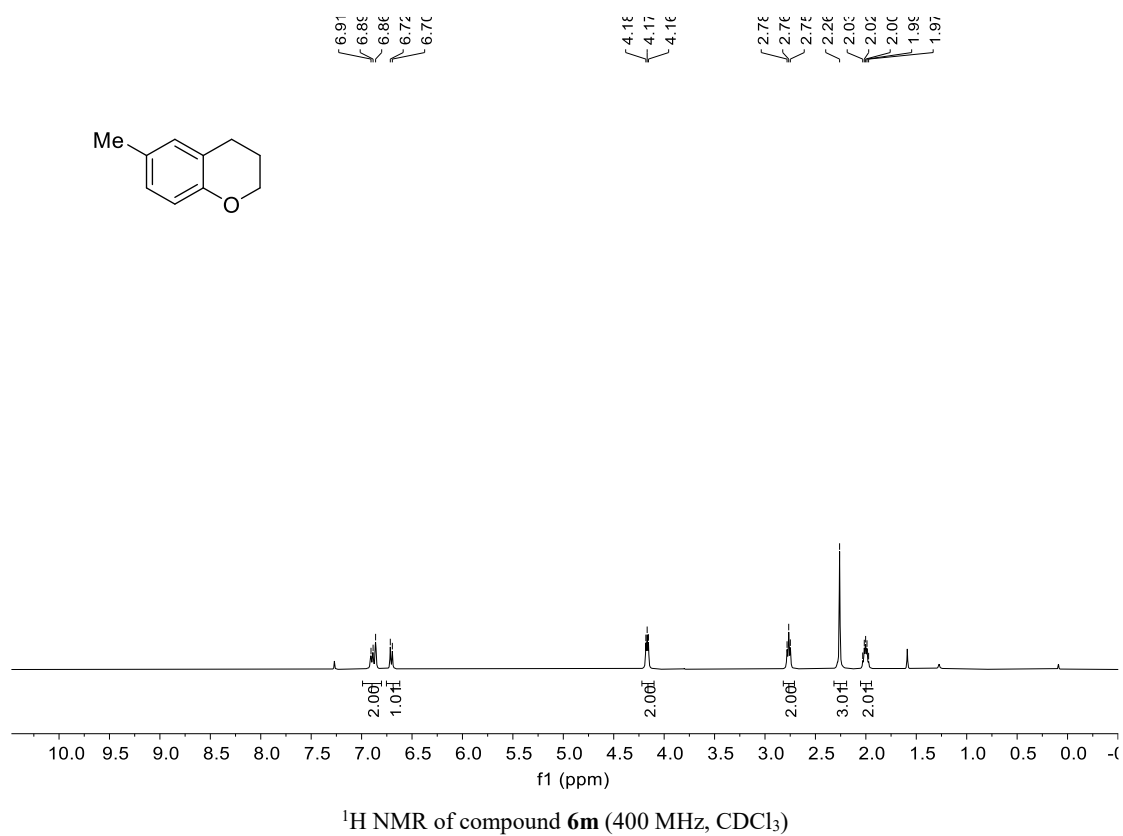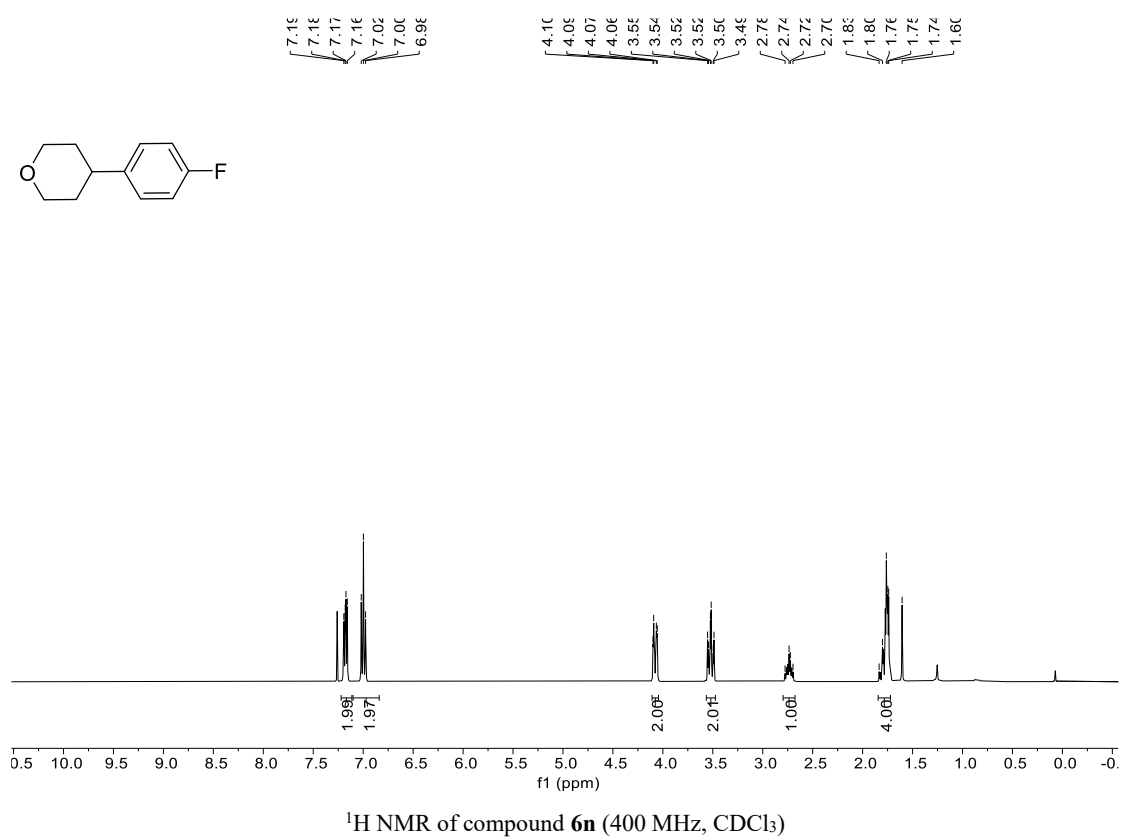

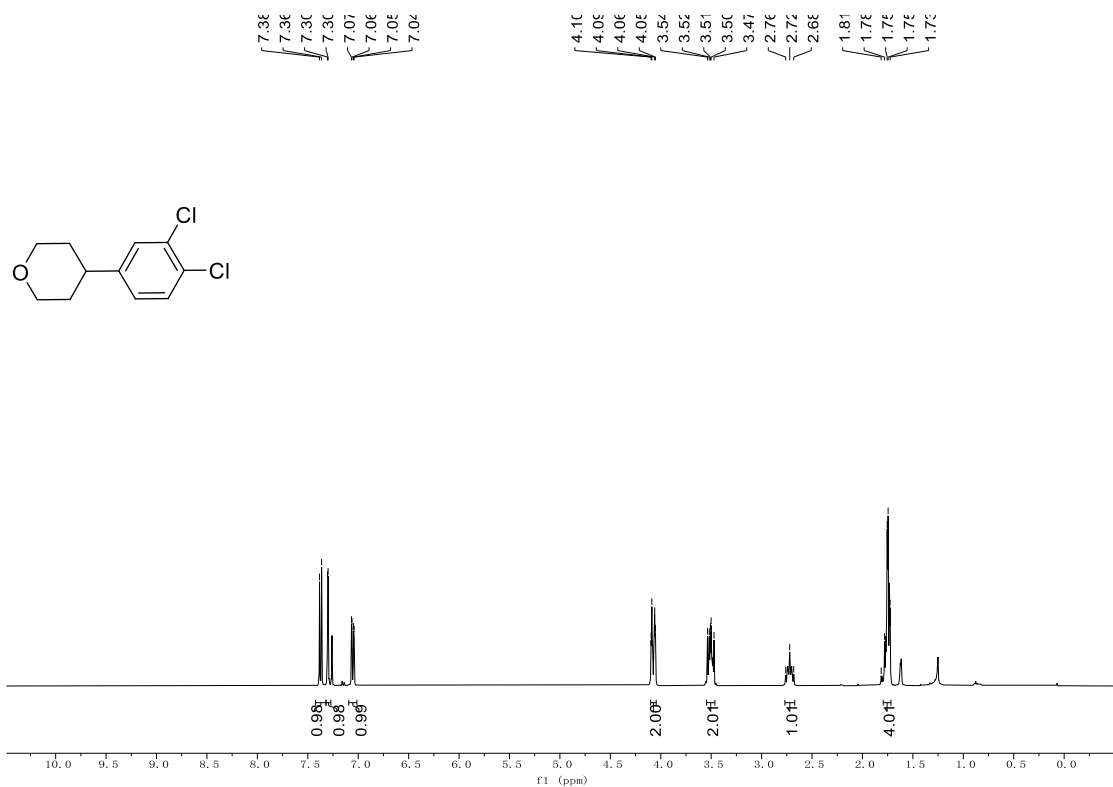

<sup>1</sup>H NMR of compound **6o** (400 MHz, CDCl<sub>3</sub>)

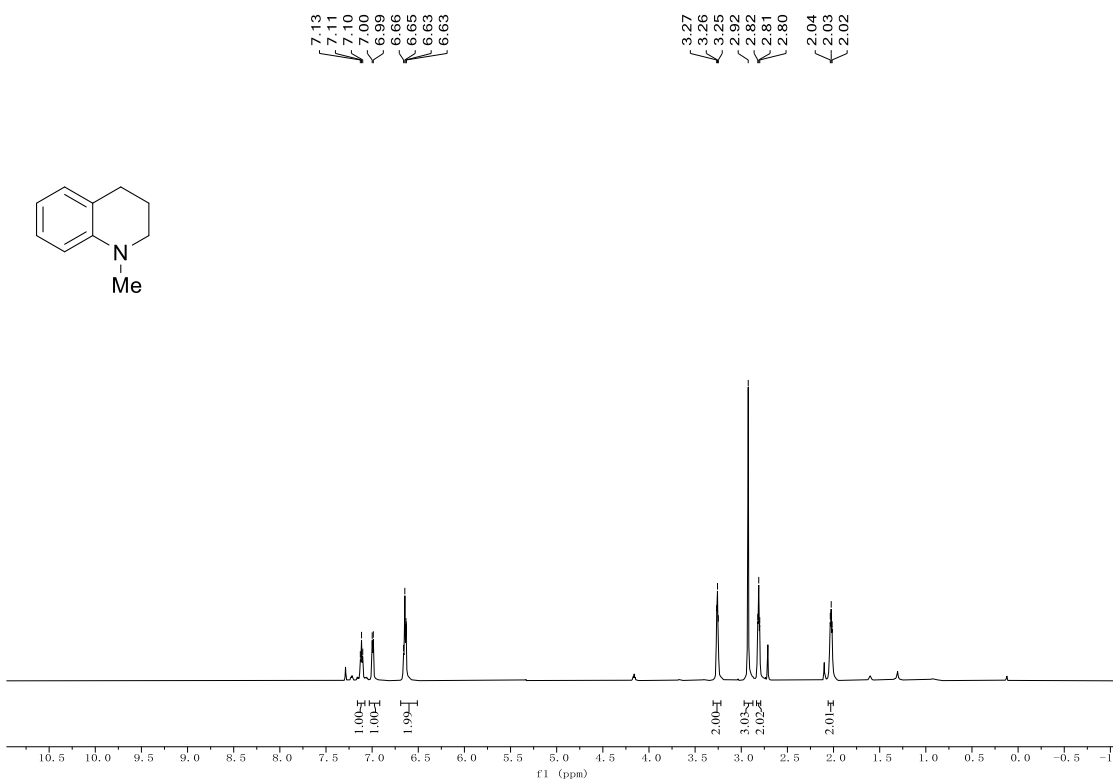

<sup>1</sup>H NMR of compound **6p** (600 MHz, CDCl<sub>3</sub>)

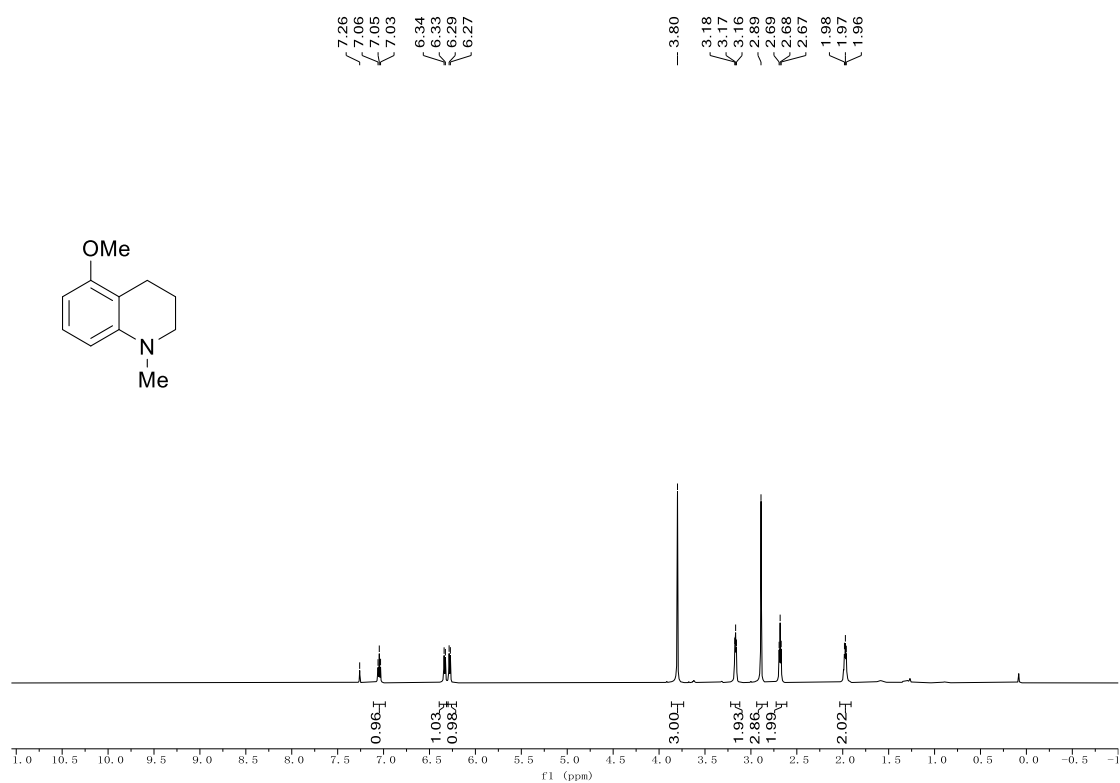

<sup>1</sup>H NMR of compound **6q** (600 MHz, CDCl<sub>3</sub>)

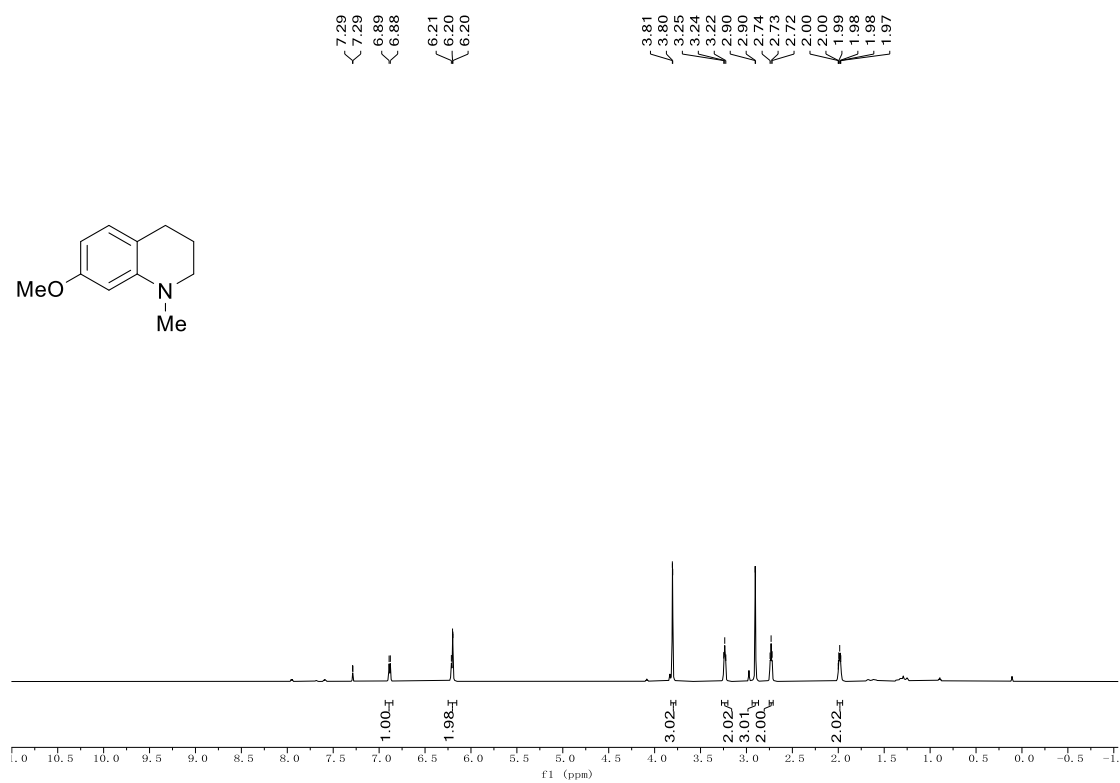

<sup>1</sup>H NMR of compound **6r** (600 MHz, CDCl<sub>3</sub>)

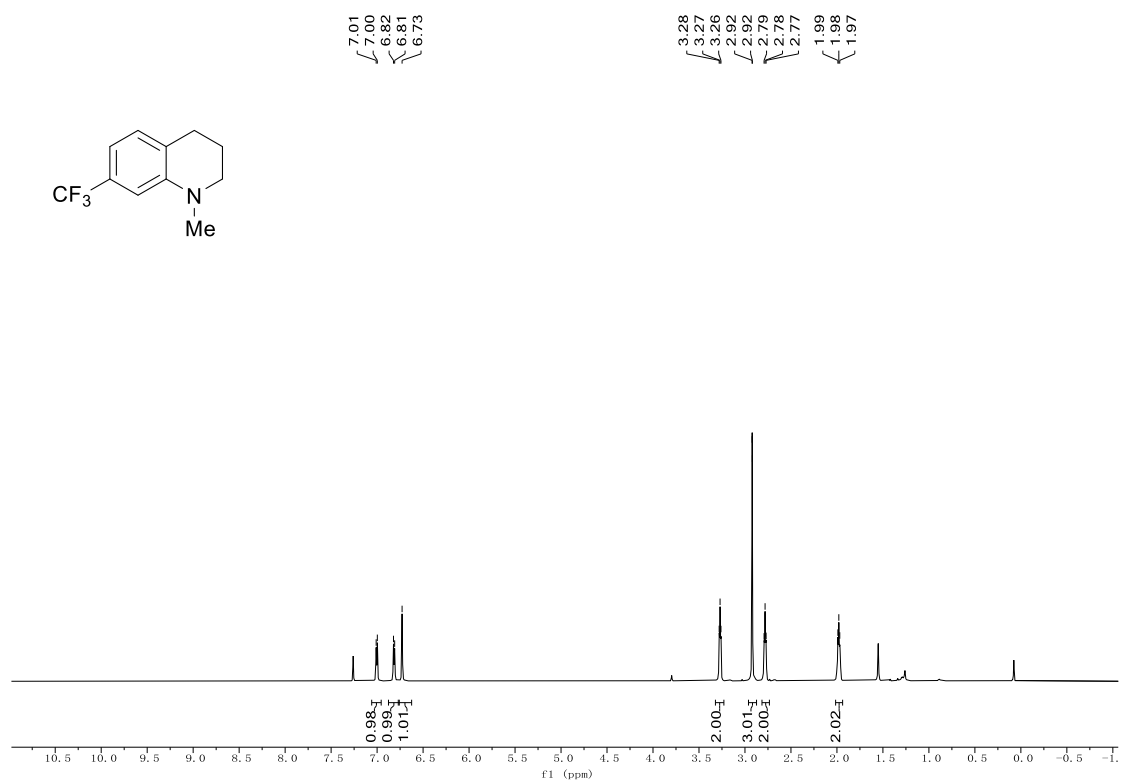

<sup>1</sup>H NMR of compound **6s** (600 MHz, CDCl<sub>3</sub>)

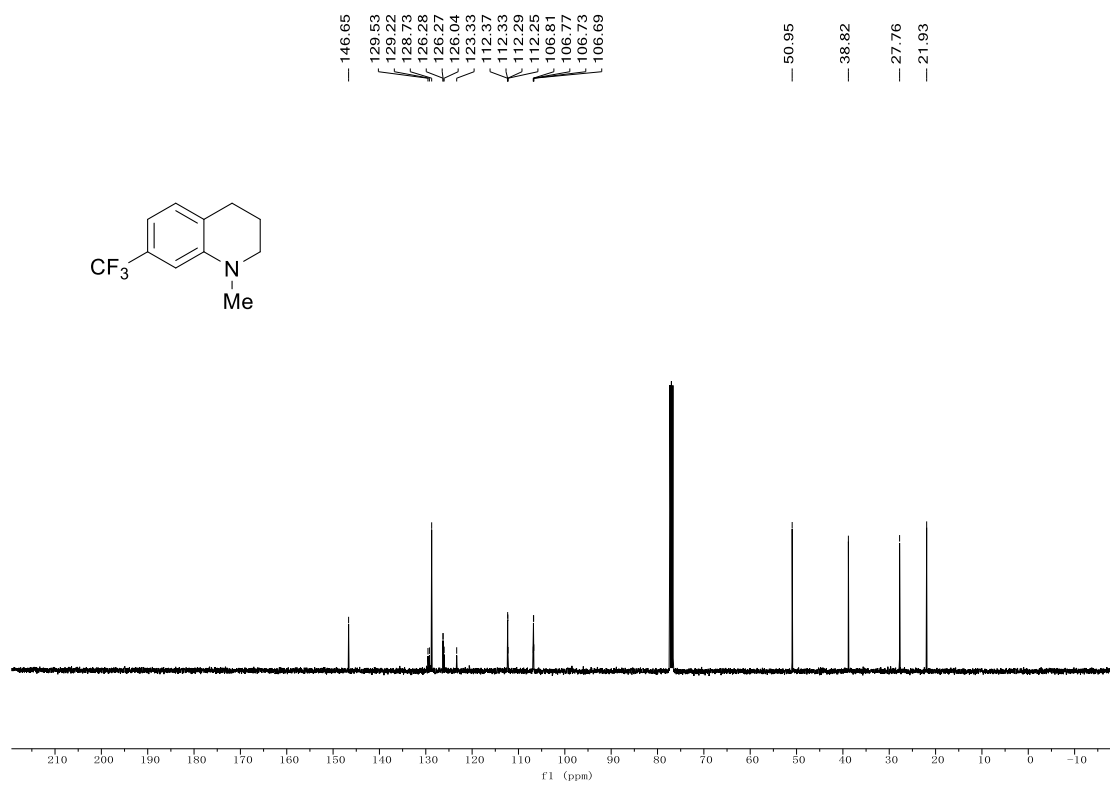

<sup>13</sup>C NMR of compound **6s** (101 MHz, CDCl<sub>3</sub>)

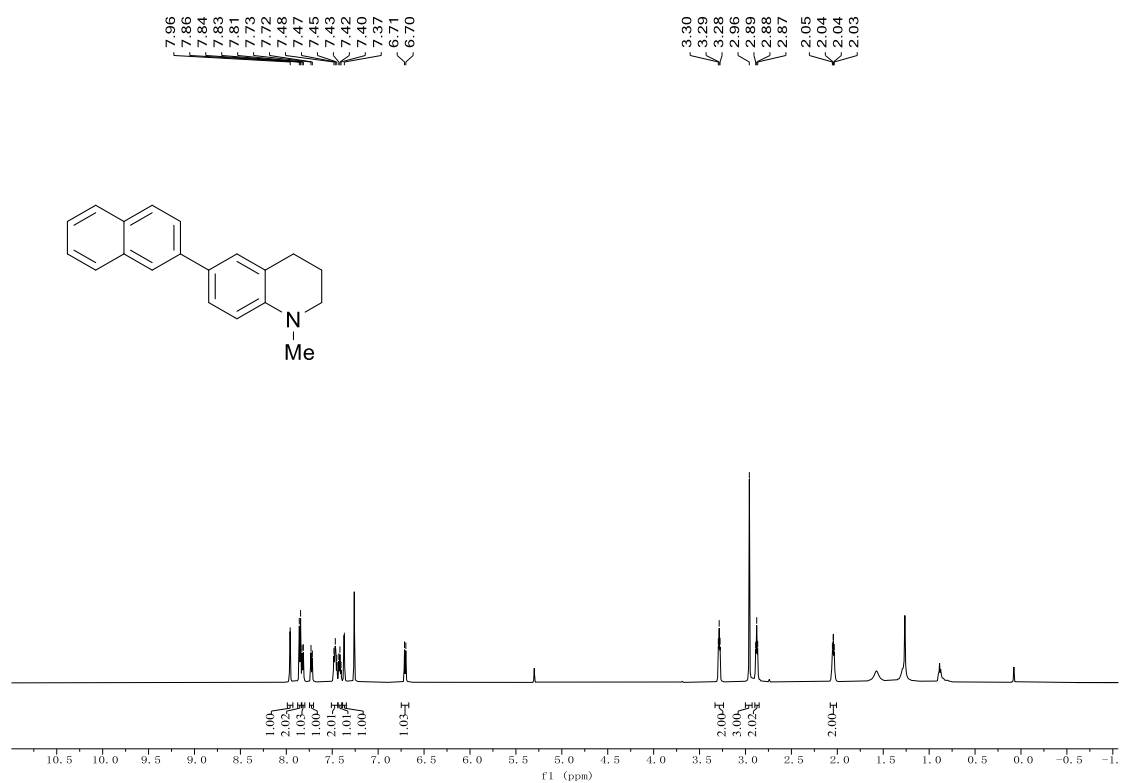

<sup>1</sup>H NMR of compound **6t** (600 MHz, CDCl<sub>3</sub>)

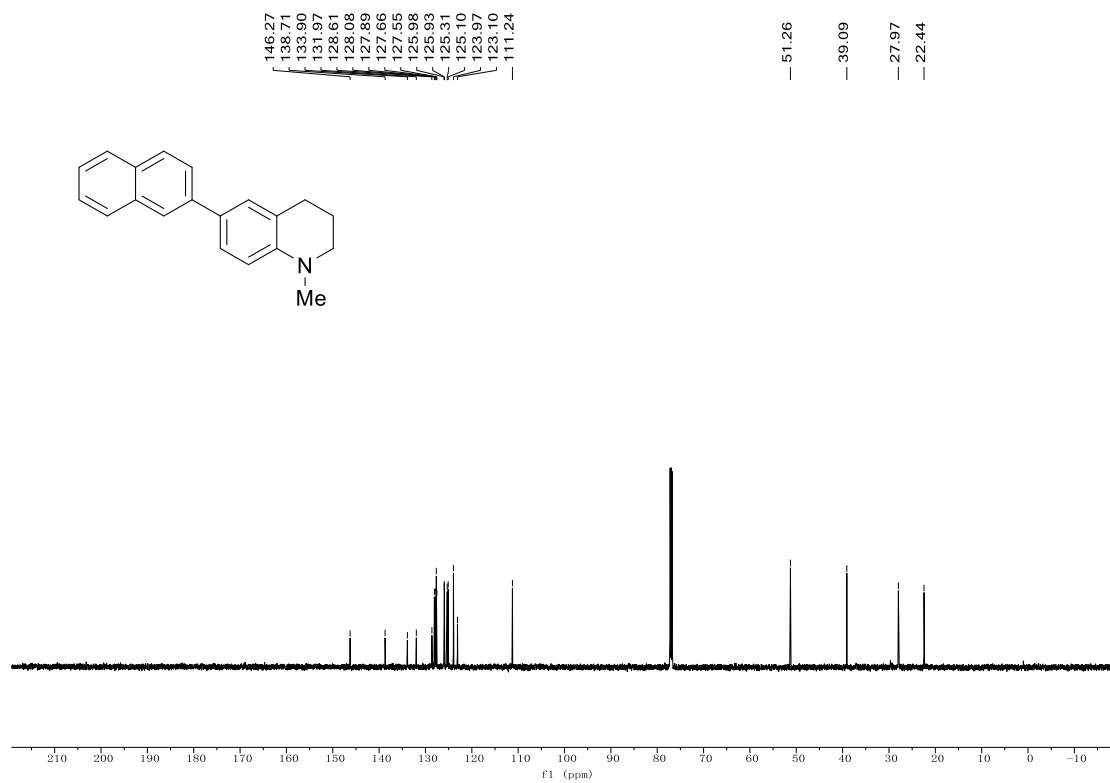

<sup>13</sup>C NMR of compound **6t** (151 MHz, CDCl<sub>3</sub>)

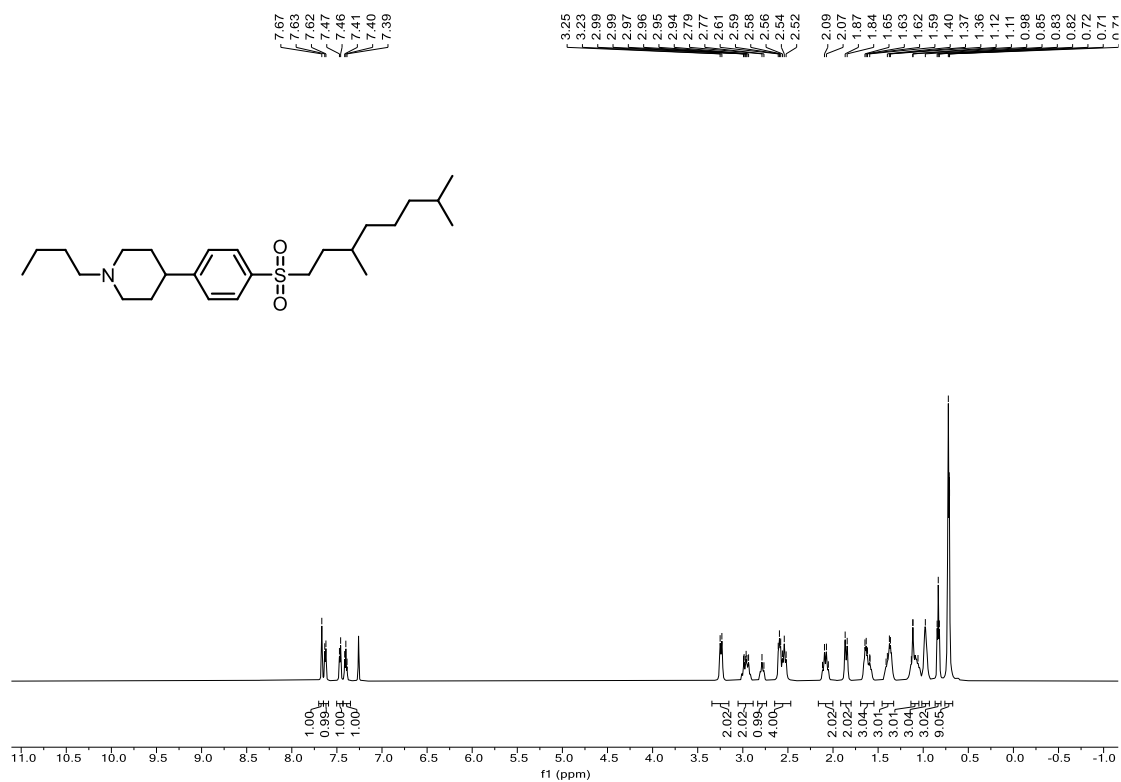

<sup>1</sup>H NMR of compound 8' (600 MHz, CDCl<sub>3</sub>)

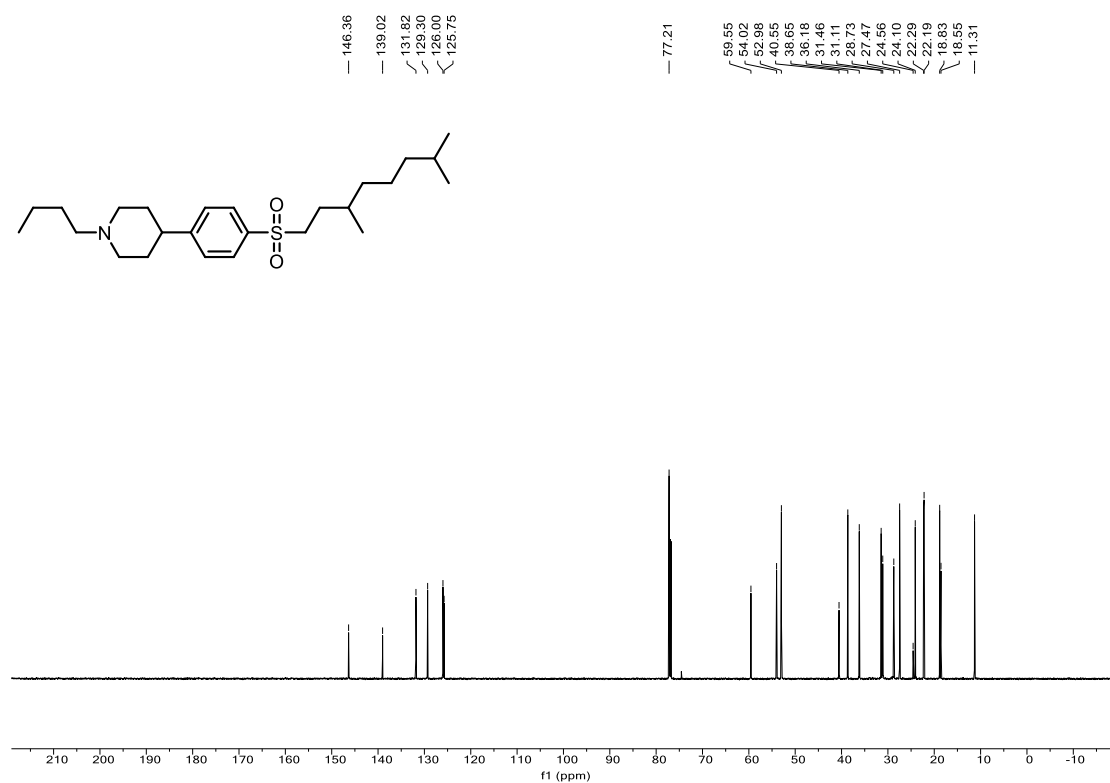

<sup>13</sup>C NMR of compound 8' (151 MHz, CDCl<sub>3</sub>)

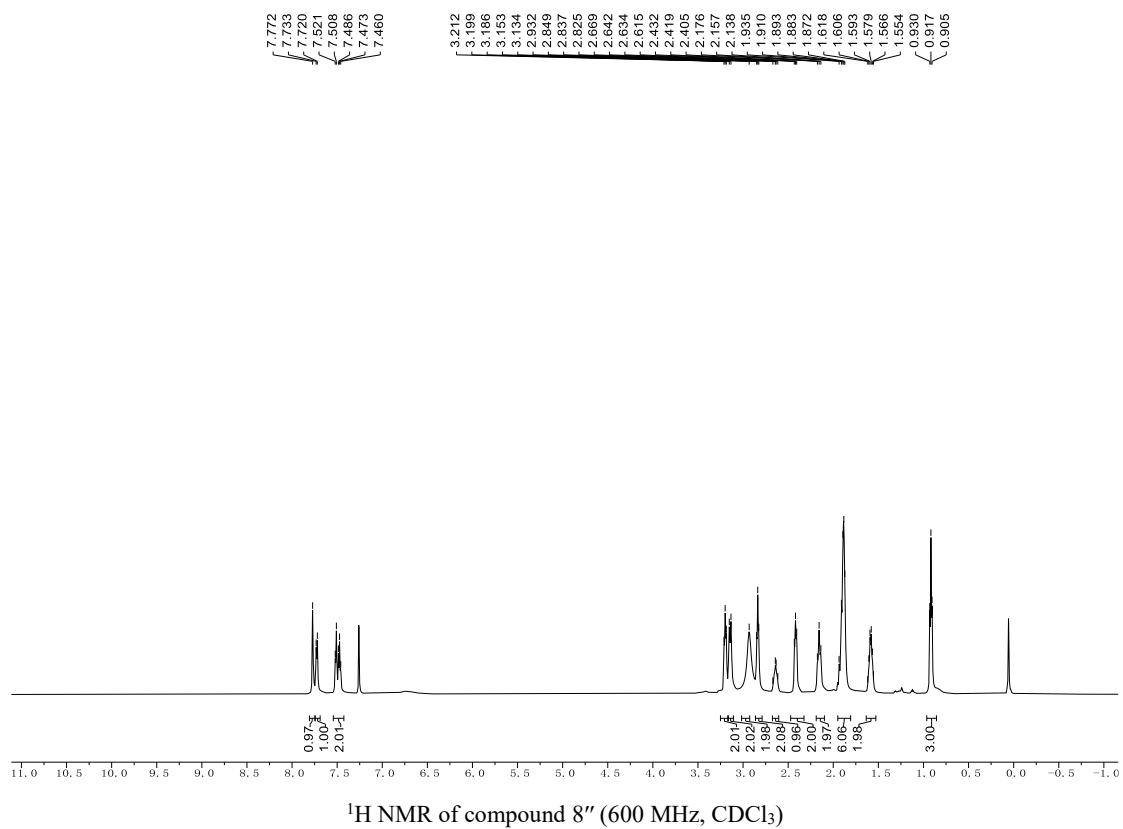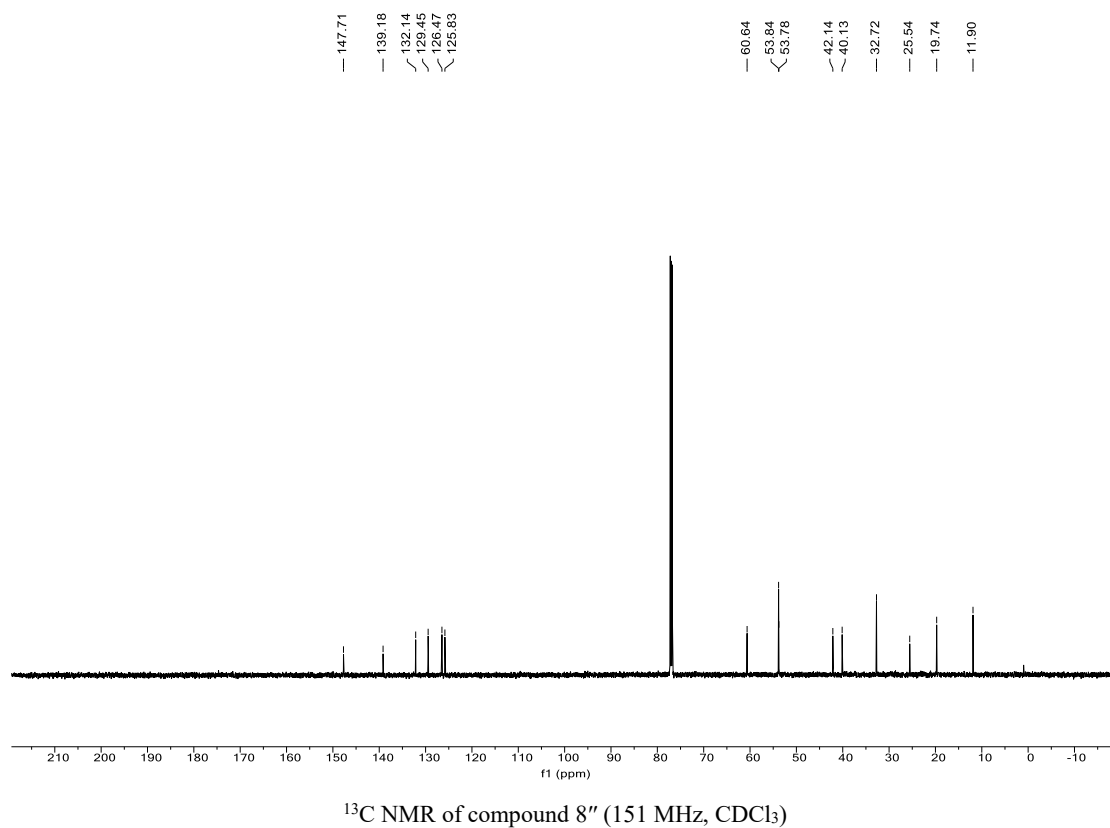



## 10 Cartesian coordinates of all optimized structures

### 5a

|   |             |             |             |
|---|-------------|-------------|-------------|
| C | -1.63869500 | -1.31748400 | -0.40125900 |
| C | -0.96023700 | -0.20782400 | 0.12571800  |
| C | 0.34376200  | -0.36685800 | 0.65804100  |
| C | 0.90259500  | -1.65170600 | 0.65787700  |
| C | 0.22840100  | -2.75779800 | 0.13348400  |
| C | -1.04597700 | -2.58238800 | -0.40295000 |
| H | -2.63906100 | -1.20670100 | -0.81788900 |
| H | 1.89046900  | -1.78895600 | 1.10904000  |
| H | 0.69384700  | -3.74553700 | 0.15159700  |
| H | -1.59260100 | -3.43109300 | -0.82097200 |
| C | 1.14735900  | 0.80019800  | 1.18501600  |
| H | 0.53202700  | 1.39527600  | 1.88092900  |
| H | 1.99096300  | 0.40280500  | 1.76899500  |
| C | 1.71095200  | 1.73410100  | 0.09292500  |
| H | 0.90311700  | 2.34126600  | -0.34718900 |
| H | 2.41481900  | 2.43434000  | 0.57308000  |
| C | 2.42296900  | 0.99664400  | -1.03996000 |
| H | 2.89014500  | 1.73324200  | -1.71473200 |
| H | 1.68079000  | 0.43916900  | -1.64248300 |
| S | -1.67238700 | 1.42271800  | 0.17983500  |
| C | -3.36617000 | 1.16047900  | -0.41029100 |
| H | -3.85419600 | 2.14256100  | -0.34102700 |
| H | -3.38906300 | 0.82701100  | -1.45810200 |
| H | -3.90976800 | 0.44541700  | 0.22442000  |
| O | 3.45368600  | 0.13871200  | -0.58477700 |
| H | 3.04747700  | -0.70617100 | -0.35640500 |

### 6a

|   |             |             |             |
|---|-------------|-------------|-------------|
| C | -1.42756100 | -1.38107200 | 0.05696100  |
| C | -0.27622700 | -0.61606900 | -0.16391100 |
| C | -0.34736000 | 0.79211700  | -0.22332800 |
| C | -1.58838700 | 1.40689700  | -0.02115300 |
| C | -2.74088800 | 0.64675500  | 0.19639100  |
| C | -2.66140600 | -0.74861300 | 0.22430000  |
| H | -1.34743900 | -2.46916400 | 0.10858200  |
| H | -1.65320000 | 2.49809000  | -0.05563600 |
| H | -3.70236300 | 1.14450100  | 0.34287100  |
| H | -3.55971500 | -1.34726900 | 0.39347000  |

|                       |    |             |             |             |
|-----------------------|----|-------------|-------------|-------------|
|                       | C  | 0.90369800  | 1.55822100  | -0.56069100 |
|                       | H  | 1.18696100  | 1.27619400  | -1.59026700 |
|                       | H  | 0.70519800  | 2.64040300  | -0.56580800 |
|                       | C  | 2.11080800  | 1.24539500  | 0.35017200  |
|                       | H  | 3.02743400  | 1.56404200  | -0.17056700 |
|                       | H  | 2.04393300  | 1.84499200  | 1.27270500  |
|                       | C  | 2.22141500  | -0.23776400 | 0.75181600  |
|                       | H  | 3.26492900  | -0.58373200 | 0.75397700  |
|                       | H  | 1.81327200  | -0.40421500 | 1.75918200  |
|                       | S  | 1.31602800  | -1.38494000 | -0.36949100 |
| CH <sub>3</sub> OH    |    |             |             |             |
|                       | C  | 0.65445000  | -0.01958700 | 0.00000000  |
|                       | H  | 1.09166200  | 0.99097500  | -0.00000100 |
|                       | H  | 1.04098200  | -0.54686400 | -0.89598900 |
|                       | H  | 1.04098200  | -0.54686300 | 0.89599000  |
|                       | O  | -0.74535300 | 0.12246900  | 0.00000000  |
|                       | H  | -1.13750200 | -0.75948400 | 0.00000000  |
| AlCl <sub>3</sub> -5a |    |             |             |             |
|                       | Al | 2.06494800  | 0.03237200  | -0.40125500 |
|                       | Cl | 2.51275100  | 1.09402700  | 1.39070300  |
|                       | Cl | 3.51214300  | -1.40279300 | -0.97662400 |
|                       | Cl | 1.15293900  | 1.21437900  | -1.92593400 |
|                       | C  | -2.28985100 | 1.24836800  | -0.96747100 |
|                       | C  | -2.06872300 | 0.52314600  | 0.21696500  |
|                       | C  | -2.38973300 | -0.85887400 | 0.25934600  |
|                       | C  | -2.92478300 | -1.45659000 | -0.89230900 |
|                       | C  | -3.13687000 | -0.73408000 | -2.06536800 |
|                       | C  | -2.81280700 | 0.62400100  | -2.09759800 |
|                       | H  | -2.03934300 | 2.30643500  | -1.01584900 |
|                       | H  | -3.17511900 | -2.52070400 | -0.85907600 |
|                       | H  | -3.54770400 | -1.22760400 | -2.94828700 |
|                       | H  | -2.96261100 | 1.20597800  | -3.00948600 |
|                       | C  | -2.12497100 | -1.72084700 | 1.48086400  |
|                       | H  | -2.10149100 | -1.10397300 | 2.39184800  |
|                       | H  | -2.96873000 | -2.41765500 | 1.60356000  |
|                       | C  | -0.83087900 | -2.55494900 | 1.39341400  |
|                       | H  | -0.76072500 | -3.19784100 | 2.28658900  |
|                       | H  | -0.87608800 | -3.22984500 | 0.52200600  |
|                       | C  | 0.45715900  | -1.75518600 | 1.32891400  |
|                       | H  | 1.33796000  | -2.41073800 | 1.34947500  |

|   |             |             |             |
|---|-------------|-------------|-------------|
| H | 0.53156600  | -1.01923500 | 2.14219700  |
| S | -1.36813000 | 1.26687900  | 1.67710800  |
| C | -0.70667100 | 2.84430600  | 1.06819600  |
| H | -0.07945400 | 3.22313400  | 1.88580300  |
| H | -0.07410200 | 2.68714600  | 0.18454000  |
| H | -1.50930600 | 3.56447200  | 0.85589900  |
| O | 0.56425300  | -1.03331000 | 0.06629100  |
| H | -0.29750700 | -0.63518500 | -0.18514400 |

#### TS1A

|    |             |             |             |
|----|-------------|-------------|-------------|
| Al | -2.76089700 | -0.24501900 | 0.20805000  |
| Cl | -1.57315100 | 0.20894500  | 1.98160600  |
| Cl | -2.78808700 | 1.50685600  | -1.06706000 |
| Cl | -4.65976700 | -1.07860900 | 0.67938300  |
| C  | 3.31695600  | 1.06146600  | 1.04836100  |
| C  | 2.75051100  | 0.50343000  | -0.10126700 |
| C  | 3.06539900  | -0.80569700 | -0.51778800 |
| C  | 3.97420600  | -1.53844900 | 0.25510300  |
| C  | 4.54991600  | -0.99034900 | 1.40339500  |
| C  | 4.21802500  | 0.30711700  | 1.80173100  |
| H  | 3.06044900  | 2.07523500  | 1.35846000  |
| H  | 4.22742800  | -2.55748200 | -0.04851500 |
| H  | 5.25536900  | -1.58009100 | 1.99245400  |
| H  | 4.66159700  | 0.73770600  | 2.70193900  |
| C  | 2.37897800  | -1.39255300 | -1.72399700 |
| H  | 2.51867400  | -0.73941500 | -2.60178500 |
| H  | 2.83745700  | -2.35911400 | -1.97733100 |
| C  | 0.85983300  | -1.62544700 | -1.51005300 |
| H  | 0.42529000  | -2.02389800 | -2.43784800 |
| H  | 0.75045000  | -2.39520000 | -0.73139200 |
| C  | 0.05271100  | -0.43448100 | -1.07243700 |
| H  | -0.57807900 | 0.11674800  | -1.76208300 |
| H  | -0.01186600 | -0.19403800 | -0.01540700 |
| S  | 1.59476700  | 1.37049100  | -1.14225700 |
| C  | 0.67043600  | 2.43777500  | 0.00308000  |
| H  | -0.25865300 | 2.70148100  | -0.52201600 |
| H  | 0.40690200  | 1.88462400  | 0.91481800  |
| H  | 1.25392900  | 3.34004300  | 0.22680800  |
| O  | -1.76874400 | -1.42598700 | -0.72465200 |
| H  | -1.68836200 | -2.31045100 | -0.34297900 |

#### Int1A

|    |             |             |             |
|----|-------------|-------------|-------------|
| Al | -2.53737000 | 0.30077400  | 0.33497000  |
| Cl | -1.00566100 | 1.57002500  | -0.63419000 |
| Cl | -2.71480200 | -1.46924600 | -0.95076600 |
| Cl | -4.39538400 | 1.34277300  | 0.52535100  |
| C  | 2.66382900  | 0.90445700  | -1.40911400 |
| C  | 2.46091200  | -0.12045800 | -0.48742600 |
| C  | 2.92326500  | -0.05634200 | 0.84002000  |
| C  | 3.60958400  | 1.10263400  | 1.21973300  |
| C  | 3.83276300  | 2.13887100  | 0.31047400  |
| C  | 3.36439200  | 2.04084400  | -1.00151800 |
| H  | 2.27149800  | 0.84090300  | -2.42371900 |
| H  | 3.96952600  | 1.18986000  | 2.24759000  |
| H  | 4.36816200  | 3.03461000  | 0.63192900  |
| H  | 3.52581100  | 2.85623500  | -1.70899300 |
| C  | 2.67813600  | -1.21033400 | 1.78085300  |
| H  | 3.27736400  | -2.06798800 | 1.42444200  |
| H  | 3.06306400  | -0.96609300 | 2.78041100  |
| C  | 1.19810300  | -1.66079600 | 1.87788300  |
| H  | 1.16751200  | -2.71318800 | 2.19559100  |
| H  | 0.65219400  | -1.07211500 | 2.62977100  |
| C  | 0.39923400  | -1.46050100 | 0.59640700  |
| H  | -0.42543000 | -2.16694200 | 0.44788100  |
| H  | 0.01764400  | -0.43844300 | 0.52282400  |
| S  | 1.51102900  | -1.59675800 | -0.87401500 |
| C  | 0.44505200  | -1.11498400 | -2.25616100 |
| H  | -0.37936600 | -1.84028700 | -2.26590700 |
| H  | 0.03172200  | -0.11375400 | -2.06329700 |
| H  | 1.04801500  | -1.17873900 | -3.17054600 |
| O  | -1.85805800 | -0.20262200 | 1.86551200  |
| H  | -2.39612700 | -0.02575700 | 2.64392300  |

TS2A

|    |             |             |             |
|----|-------------|-------------|-------------|
| Al | 2.86422800  | -0.11976700 | -0.11630400 |
| Cl | 1.57402100  | 0.76968100  | -1.61847500 |
| Cl | 2.40548800  | 0.75064800  | 1.81213700  |
| Cl | 4.92001700  | -0.13398300 | -0.66464700 |
| C  | -1.09553100 | 1.20526000  | 0.73359000  |
| C  | -2.12674600 | 0.28685300  | 0.52900200  |
| C  | -3.35679900 | 0.65852900  | -0.04984900 |
| C  | -3.51056300 | 1.98895500  | -0.45275800 |
| C  | -2.48301800 | 2.91855900  | -0.26570800 |
| C  | -1.28295100 | 2.52938700  | 0.33110900  |
| H  | -0.14455300 | 0.91984400  | 1.18331100  |

|   |             |             |             |
|---|-------------|-------------|-------------|
| H | -4.45263900 | 2.29904900  | -0.91227400 |
| H | -2.62195200 | 3.95187700  | -0.59115300 |
| H | -0.46923400 | 3.24310500  | 0.47110400  |
| C | -4.45101600 | -0.36957000 | -0.17628000 |
| H | -4.76204300 | -0.65868600 | 0.84322800  |
| H | -5.33488100 | 0.07015600  | -0.65965400 |
| C | -4.03177800 | -1.65471300 | -0.92583300 |
| H | -4.73266200 | -2.45998900 | -0.66000000 |
| H | -4.12073200 | -1.49679600 | -2.01192200 |
| C | -2.58888400 | -2.10437700 | -0.64313400 |
| H | -2.49635300 | -3.19796300 | -0.58272700 |
| H | -1.89297100 | -1.73665800 | -1.41068400 |
| S | -1.94281200 | -1.44680100 | 0.95269100  |
| C | 0.27361400  | -1.73487900 | 0.48546000  |
| H | 0.20216900  | -2.81910400 | 0.44206400  |
| H | 0.16489100  | -1.12896000 | -0.41053400 |
| H | 0.59513600  | -1.27302700 | 1.41410700  |
| O | 2.26198400  | -1.81434300 | 0.05664500  |
| H | 2.45008100  | -2.40423100 | -0.68598000 |

CH<sub>3</sub>CH<sub>2</sub>OH

|   |             |             |             |
|---|-------------|-------------|-------------|
| C | 0.09075100  | 0.54169500  | 0.00007700  |
| H | 0.13600000  | 1.20328100  | 0.89058200  |
| H | 0.13623800  | 1.20345300  | -0.89027000 |
| O | 1.14839200  | -0.39671200 | 0.00018700  |
| H | 1.98403500  | 0.08571200  | -0.00138200 |
| C | -1.22151300 | -0.21933600 | -0.00009300 |
| H | -1.29087600 | -0.86288400 | -0.89097600 |
| H | -1.29050000 | -0.86361500 | 0.89028500  |
| H | -2.07745900 | 0.47359200  | 0.00036200  |

AlCl<sub>3</sub>-CH<sub>3</sub>CH<sub>2</sub>OH

|    |             |             |             |
|----|-------------|-------------|-------------|
| Al | -0.67836100 | 0.05611600  | -0.03495200 |
| Cl | -0.76077800 | 1.14554100  | 1.78701100  |
| Cl | -0.65084500 | 1.23293500  | -1.79402700 |
| Cl | -1.66676700 | -1.82503400 | -0.06208200 |
| C  | 2.29852000  | 0.14048300  | 0.31258000  |
| H  | 2.13636200  | 1.08537300  | -0.22290800 |
| H  | 2.30488000  | 0.34856800  | 1.39307000  |
| O  | 1.11147900  | -0.64706900 | 0.00970400  |
| H  | 1.16521800  | -1.56181600 | 0.33234200  |
| C  | 3.54247100  | -0.57210500 | -0.16393900 |

|                                                  |    |             |             |             |
|--------------------------------------------------|----|-------------|-------------|-------------|
|                                                  | H  | 3.68283900  | -1.53338200 | 0.35809600  |
|                                                  | H  | 3.49801700  | -0.75997900 | -1.24692800 |
|                                                  | H  | 4.42623300  | 0.04951100  | 0.04590000  |
| CH <sub>3</sub> SCH <sub>3</sub>                 |    |             |             |             |
|                                                  | C  | -1.38527400 | 0.51425000  | -0.00000300 |
|                                                  | S  | -0.00000200 | -0.66379200 | 0.00000000  |
|                                                  | C  | 1.38527900  | 0.51423800  | 0.00000300  |
|                                                  | H  | 2.31267500  | -0.07622100 | 0.00034500  |
|                                                  | H  | 1.37189000  | 1.15030100  | -0.89928200 |
|                                                  | H  | 1.37155600  | 1.15081400  | 0.89892100  |
|                                                  | H  | -1.37192400 | 1.15026700  | 0.89930900  |
|                                                  | H  | -1.37151800 | 1.15080600  | -0.89892800 |
|                                                  | H  | -2.31266800 | -0.07622200 | -0.00036300 |
| CH <sub>3</sub> CH <sub>2</sub> SCH <sub>3</sub> |    |             |             |             |
|                                                  | C  | -0.80243700 | 0.63640100  | -0.00004200 |
|                                                  | S  | 0.50896100  | -0.64061500 | -0.00001700 |
|                                                  | C  | 1.97103600  | 0.43967400  | 0.00002500  |
|                                                  | H  | 2.85628000  | -0.21207000 | 0.00022400  |
|                                                  | H  | 2.00075800  | 1.07548100  | -0.89890000 |
|                                                  | H  | 2.00050700  | 1.07567800  | 0.89883100  |
|                                                  | H  | -0.67568300 | 1.27570500  | 0.88989900  |
|                                                  | H  | -0.67577100 | 1.27560900  | -0.89005900 |
|                                                  | C  | -2.17718100 | -0.02154000 | 0.00004000  |
|                                                  | H  | -2.97073800 | 0.74235500  | -0.00004000 |
|                                                  | H  | -2.31361800 | -0.65514000 | -0.89043400 |
|                                                  | H  | -2.31361100 | -0.65498500 | 0.89062100  |
| TS1B                                             |    |             |             |             |
|                                                  | Al | -1.68917200 | 0.01606000  | -0.01263000 |
|                                                  | Cl | -0.62362500 | -1.23242200 | -1.46522800 |
|                                                  | Cl | -1.15424000 | -0.64880700 | 1.96807500  |
|                                                  | Cl | -3.76241400 | 0.16530500  | -0.45265500 |
|                                                  | C  | 3.27216100  | -0.55805600 | -1.44993800 |
|                                                  | C  | 1.13948300  | 1.28889400  | 0.08572500  |
|                                                  | H  | 0.81876300  | 0.84033600  | 1.02301500  |
|                                                  | H  | 1.00257800  | 0.70859800  | -0.81923200 |
|                                                  | S  | 3.16411000  | -0.06459200 | 0.29705200  |
|                                                  | C  | 2.30713500  | -1.51794700 | 0.98017900  |
|                                                  | H  | 2.04623700  | -1.28676400 | 2.02100800  |

|       |    |             |             |             |
|-------|----|-------------|-------------|-------------|
|       | H  | 1.38587500  | -1.71252700 | 0.41307000  |
|       | H  | 2.98151200  | -2.38497900 | 0.94761800  |
|       | O  | -0.90092300 | 1.63612100  | -0.13899000 |
|       | H  | -1.09538900 | 2.13186100  | -0.94669600 |
|       | H  | 3.96392400  | -1.40594500 | -1.55266800 |
|       | H  | 2.27525700  | -0.83525000 | -1.82418800 |
|       | H  | 3.66600300  | 0.30040500  | -2.01118900 |
|       | C  | 1.66847400  | 2.68560700  | 0.07591600  |
|       | H  | 2.10921800  | 2.96092600  | -0.89265900 |
|       | H  | 0.83132800  | 3.36629800  | 0.29286000  |
|       | H  | 2.41675900  | 2.83247300  | 0.86775600  |
| Int1B |    |             |             |             |
|       | Al | -1.67141700 | 0.18467000  | -0.14887500 |
|       | Cl | -0.69133700 | -1.71541700 | -0.75303500 |
|       | Cl | -0.99728900 | 0.55488800  | 1.89624300  |
|       | Cl | -3.79053700 | -0.01975700 | -0.31618000 |
|       | C  | 2.82850800  | -1.24585300 | -1.17013100 |
|       | C  | 1.75683300  | 1.16563700  | -0.15956700 |
|       | H  | 1.25448100  | 1.45804500  | 0.77345000  |
|       | H  | 0.98070100  | 0.76352700  | -0.82500100 |
|       | S  | 2.87824100  | -0.20801700 | 0.31742100  |
|       | C  | 1.91581100  | -1.19927700 | 1.49267800  |
|       | H  | 1.68586400  | -0.55206200 | 2.34751200  |
|       | H  | 0.98486600  | -1.53417000 | 1.01255400  |
|       | H  | 2.56257300  | -2.03506900 | 1.79189400  |
|       | O  | -0.98108900 | 1.43754700  | -1.15382000 |
|       | H  | -1.50762300 | 1.73386500  | -1.90361000 |
|       | H  | 3.44185300  | -2.13605800 | -0.97824600 |
|       | H  | 1.77862900  | -1.50628000 | -1.37568400 |
|       | H  | 3.26875300  | -0.65733500 | -1.98562500 |
|       | C  | 2.52295800  | 2.30309100  | -0.80888900 |
|       | H  | 3.04966900  | 1.98720500  | -1.72346600 |
|       | H  | 1.77808200  | 3.05747400  | -1.10351200 |
|       | H  | 3.24851800  | 2.77134900  | -0.12708500 |
| TS2B  |    |             |             |             |
|       | Al | 1.84490200  | -0.10124200 | 0.08226200  |
|       | Cl | 0.65654900  | -1.03808800 | -1.50110300 |
|       | Cl | 1.58581400  | 2.03300900  | -0.06692100 |
|       | Cl | 3.83242400  | -0.84679800 | 0.15746200  |
|       | C  | -3.33340100 | -0.76662000 | -0.55355400 |

|   |             |             |             |
|---|-------------|-------------|-------------|
| C | -0.92867600 | 0.00020900  | 1.30365900  |
| H | -0.53369300 | 1.00537500  | 1.19475300  |
| H | -0.90083300 | -0.69113900 | 0.47030400  |
| S | -2.95573900 | 0.74214000  | 0.41841600  |
| C | -2.14047900 | 1.74038000  | -0.86716700 |
| H | -1.74980600 | 2.64526000  | -0.38365500 |
| H | -1.30441900 | 1.17764500  | -1.30733200 |
| H | -2.87741400 | 2.01654400  | -1.63354200 |
| O | 0.97847500  | -0.51507000 | 1.61852600  |
| H | 1.07853200  | -1.41958600 | 1.94572900  |
| H | -4.06478700 | -0.47415700 | -1.32244800 |
| H | -2.40431400 | -1.07131500 | -1.06174400 |
| H | -1.28701300 | -0.31766300 | 2.28034200  |
| C | -3.87897500 | -1.86624600 | 0.34615900  |
| H | -4.12695000 | -2.75100300 | -0.25971400 |
| H | -3.13871900 | -2.17622300 | 1.09981100  |
| H | -4.79246200 | -1.54570200 | 0.87020100  |

C<sub>6</sub>H<sub>5</sub>CH<sub>2</sub>OH

|   |             |             |             |
|---|-------------|-------------|-------------|
| C | 1.90775600  | 0.62661600  | 0.00001600  |
| H | 2.12012700  | 1.25761600  | 0.88855700  |
| H | 2.12013800  | 1.25769000  | -0.88847000 |
| O | 2.68966000  | -0.54506300 | -0.00002600 |
| H | 3.61948200  | -0.29097100 | 0.00007300  |
| C | 0.43744600  | 0.27744800  | 0.00000200  |
| C | -0.52042700 | 1.30215500  | -0.00001400 |
| C | 0.00922100  | -1.05404700 | 0.00000200  |
| C | -1.88272800 | 1.00144100  | -0.00000200 |
| H | -0.19571700 | 2.34744200  | -0.00003100 |
| C | -1.35661500 | -1.35570900 | -0.00000200 |
| H | 0.75812200  | -1.84606000 | 0.00000800  |
| C | -2.30620100 | -0.33214900 | 0.00000700  |
| H | -2.61812600 | 1.80992300  | 0.00000500  |
| H | -1.67922200 | -2.40008100 | -0.00000600 |
| H | -3.37279200 | -0.56959400 | 0.00001400  |

AlCl<sub>3</sub>-C<sub>6</sub>H<sub>5</sub>CH<sub>2</sub>OH

|    |             |             |             |
|----|-------------|-------------|-------------|
| Al | -1.90631600 | 0.12561000  | -0.05828700 |
| Cl | -3.37689100 | -1.35727100 | 0.26847900  |
| Cl | -1.34930700 | 1.22626900  | 1.68212000  |
| Cl | -1.96743500 | 1.19388300  | -1.89760700 |
| C  | 0.70859200  | -1.35521500 | 0.48918700  |



|   |             |             |             |
|---|-------------|-------------|-------------|
| H | 0.29622300  | -1.13695300 | 1.48252200  |
| H | 0.76507600  | -2.44253700 | 0.34408000  |
| O | -0.29664100 | -0.83935100 | -0.44440000 |
| H | 0.08862900  | -0.61675900 | -1.30926200 |
| C | 2.02958100  | -0.68443400 | 0.25855600  |
| C | 3.10076200  | -1.39800800 | -0.29634000 |
| C | 2.18822000  | 0.67875200  | 0.56200100  |
| C | 4.32131800  | -0.76257700 | -0.54000400 |
| H | 2.98063200  | -2.45860000 | -0.53406500 |
| C | 3.40533900  | 1.31176800  | 0.31145800  |
| H | 1.35298200  | 1.23456500  | 0.99483700  |
| C | 4.47295500  | 0.59260300  | -0.23786100 |
| H | 5.15297400  | -1.32652300 | -0.96817700 |
| H | 3.52404800  | 2.37102400  | 0.54996700  |
| H | 5.42582500  | 1.09135200  | -0.42981500 |

**3k** (C<sub>6</sub>H<sub>5</sub>CH<sub>2</sub>SCH<sub>3</sub>)

|   |             |             |             |
|---|-------------|-------------|-------------|
| C | 1.01827600  | -0.00157300 | 0.84102100  |
| S | 2.04968500  | 0.00094900  | -0.68272300 |
| C | 3.69778100  | -0.00020500 | 0.08768800  |
| H | 4.43541700  | 0.00115400  | -0.72753300 |
| H | 3.85308400  | 0.89774800  | 0.70633300  |
| H | 3.85325800  | -0.90012200 | 0.70343100  |
| H | 1.26836000  | -0.89498000 | 1.43491500  |
| H | 1.26861400  | 0.88988600  | 1.43773100  |
| C | -0.43686700 | -0.00081700 | 0.46016600  |
| C | -1.12120900 | -1.20730500 | 0.25276400  |
| C | -1.12015300 | 1.20651100  | 0.25415500  |
| C | -2.46248300 | -1.20816100 | -0.13563900 |
| H | -0.59297200 | -2.15360600 | 0.39630000  |
| C | -2.46143600 | 1.20899000  | -0.13424600 |
| H | -0.59110500 | 2.15220300  | 0.39868800  |
| C | -3.13687000 | 0.00082800  | -0.32923200 |
| H | -2.98353000 | -2.15646900 | -0.28841700 |
| H | -2.98161100 | 2.15796200  | -0.28587900 |
| H | -4.18671700 | 0.00142800  | -0.63206400 |

**TS1C**

|    |             |             |             |
|----|-------------|-------------|-------------|
| Al | -2.22786400 | -0.53670300 | -0.11746800 |
| Cl | -1.46433200 | -0.13522900 | 1.90725800  |
| Cl | -2.69737400 | 1.38075800  | -0.99132000 |
| Cl | -3.77274700 | -1.99793500 | -0.09657500 |

|   |             |             |             |
|---|-------------|-------------|-------------|
| C | 1.70950700  | 2.16905200  | 1.66255600  |
| C | 0.76188100  | 0.34387500  | -0.71014500 |
| H | 0.54707400  | 0.70056300  | -1.71317700 |
| H | 0.09071500  | 0.61031000  | 0.09469900  |
| S | 1.79709200  | 2.46775200  | -0.12748700 |
| C | 0.30051500  | 3.47113500  | -0.37257700 |
| H | 0.27499400  | 3.75310100  | -1.43384300 |
| H | -0.60533400 | 2.89399200  | -0.13267800 |
| H | 0.36443500  | 4.37827900  | 0.24452200  |
| O | -0.81733400 | -1.08994100 | -1.06817300 |
| H | -0.49556400 | -1.99247600 | -0.94921900 |
| H | 1.89172500  | 3.10988500  | 2.20038200  |
| H | 0.72924400  | 1.74969200  | 1.93583700  |
| H | 2.50150600  | 1.44790300  | 1.90521400  |
| C | 1.84348200  | -0.59489400 | -0.45477200 |
| C | 1.90846300  | -1.25354900 | 0.79008000  |
| C | 2.81588900  | -0.86682200 | -1.43450700 |
| C | 2.93606100  | -2.15967200 | 1.04577800  |
| H | 1.12480700  | -1.06882600 | 1.52872500  |
| C | 3.84419200  | -1.76884600 | -1.17061800 |
| H | 2.76151600  | -0.35976200 | -2.40089300 |
| C | 3.90659500  | -2.41440400 | 0.07004400  |
| H | 2.97830200  | -2.67554500 | 2.00755100  |
| H | 4.59865900  | -1.97445100 | -1.93304700 |
| H | 4.71155200  | -3.12436800 | 0.27399300  |

#### Int1C

|    |             |             |             |
|----|-------------|-------------|-------------|
| Al | -2.35309100 | -0.60416200 | 0.00537400  |
| Cl | -2.79088300 | 1.16964000  | 1.20059600  |
| Cl | -1.83859700 | 0.10259700  | -2.00007600 |
| Cl | -3.95645300 | -2.01380800 | 0.03203900  |
| C  | 0.65868200  | 1.12903100  | 1.71170600  |
| C  | 1.54364000  | 0.75691900  | -0.99635000 |
| H  | 1.82912600  | 1.33124500  | -1.88992900 |
| H  | 0.59032100  | 0.24189800  | -1.18168300 |
| S  | 1.20126800  | 2.07528600  | 0.26305700  |
| C  | -0.29122300 | 2.86828600  | -0.39936800 |
| H  | -0.96378900 | 2.11961100  | -0.83977300 |
| H  | -0.78660500 | 3.38554100  | 0.43088300  |
| H  | 0.06230500  | 3.58709800  | -1.15093600 |
| O  | -0.85292200 | -1.30199100 | 0.63082200  |
| H  | -0.97264000 | -2.02716300 | 1.25566300  |
| H  | 0.04658900  | 1.80624900  | 2.32000400  |

|   |            |             |             |
|---|------------|-------------|-------------|
| H | 0.07760700 | 0.23852100  | 1.40628100  |
| H | 1.58072700 | 0.85248200  | 2.23880400  |
| C | 2.63486000 | -0.14807800 | -0.51004800 |
| C | 2.30142900 | -1.39435300 | 0.04253200  |
| C | 3.98070800 | 0.24433700  | -0.58485100 |
| C | 3.31328300 | -2.23897500 | 0.50653600  |
| H | 1.24637500 | -1.67644900 | 0.11000800  |
| C | 4.98602000 | -0.60180300 | -0.11642200 |
| H | 4.24204900 | 1.21431300  | -1.01762000 |
| C | 4.65220800 | -1.84607600 | 0.42957800  |
| H | 3.05261100 | -3.21197300 | 0.92939400  |
| H | 6.03209200 | -0.29419300 | -0.18233800 |
| H | 5.43973400 | -2.51075700 | 0.79251500  |

TS2C

|    |             |             |             |
|----|-------------|-------------|-------------|
| Al | -2.60546900 | -0.46632100 | -0.10953600 |
| Cl | -1.27772400 | -0.88172000 | 1.58182100  |
| Cl | -3.12262100 | 1.62656100  | -0.04182300 |
| Cl | -4.20006200 | -1.86161300 | -0.25035500 |
| C  | 2.08432700  | 1.12527300  | 0.99106900  |
| C  | -0.00833700 | 0.64872100  | -1.25502900 |
| H  | -0.72883700 | 1.44988100  | -1.38315100 |
| H  | 0.09035700  | 0.14919300  | -0.30075700 |
| S  | 1.56318300  | 2.16885300  | -0.44184700 |
| C  | 0.34812300  | 3.25084500  | 0.37287400  |
| H  | -0.00487700 | 3.96683900  | -0.38166500 |
| H  | -0.50588700 | 2.66571600  | 0.74522100  |
| H  | 0.83790400  | 3.79616300  | 1.19132800  |
| O  | -1.55122300 | -0.58369100 | -1.57456300 |
| H  | -1.26297100 | -1.46822300 | -1.83824500 |
| H  | 2.66950200  | 1.77884400  | 1.65538600  |
| H  | 1.17237100  | 0.80269000  | 1.51453100  |
| H  | 0.56982800  | 0.30445400  | -2.10896700 |
| C  | 2.88714400  | -0.04711700 | 0.49691900  |
| C  | 4.17624700  | 0.14542500  | -0.02501900 |
| C  | 2.34523500  | -1.34124100 | 0.52321200  |
| C  | 4.91153400  | -0.93584100 | -0.51171700 |
| H  | 4.60463400  | 1.15117900  | -0.05040400 |
| C  | 3.08529000  | -2.42330100 | 0.03813000  |
| H  | 1.34446700  | -1.50253900 | 0.93191500  |
| C  | 4.36641800  | -2.22375000 | -0.48157700 |
| H  | 5.91471500  | -0.77450100 | -0.91308600 |
| H  | 2.65670500  | -3.42767400 | 0.07089600  |

|                                                                                     |             |             |             |
|-------------------------------------------------------------------------------------|-------------|-------------|-------------|
| H                                                                                   | 4.94307600  | -3.07093400 | -0.86008400 |
| C <sub>6</sub> H <sub>5</sub> CH <sub>2</sub> CH <sub>2</sub> OH                    |             |             |             |
| C                                                                                   | 2.44196100  | -0.40901900 | -0.40024900 |
| H                                                                                   | 2.08594900  | -0.72661900 | -1.40033300 |
| H                                                                                   | 3.39871200  | -0.93655700 | -0.20733500 |
| O                                                                                   | 2.61114800  | 0.99285700  | -0.33033700 |
| H                                                                                   | 3.08802700  | 1.28736300  | -1.11521800 |
| C                                                                                   | 1.42077000  | -0.83622600 | 0.65250300  |
| H                                                                                   | 1.45053600  | -1.93444900 | 0.73504300  |
| H                                                                                   | 1.75598800  | -0.43180300 | 1.62283700  |
| C                                                                                   | 0.00944400  | -0.38560700 | 0.35609700  |
| C                                                                                   | -0.34820600 | 0.96995900  | 0.44636400  |
| C                                                                                   | -0.96768700 | -1.30787300 | -0.04557900 |
| C                                                                                   | -1.64593400 | 1.38600500  | 0.14349900  |
| H                                                                                   | 0.40871800  | 1.69762100  | 0.74228100  |
| C                                                                                   | -2.26847700 | -0.89447700 | -0.34765900 |
| H                                                                                   | -0.70651100 | -2.36765900 | -0.11902800 |
| C                                                                                   | -2.61190900 | 0.45595100  | -0.25387400 |
| H                                                                                   | -1.90668600 | 2.44482200  | 0.21982600  |
| H                                                                                   | -3.01549400 | -1.63085300 | -0.65483800 |
| H                                                                                   | -3.62820400 | 0.78299300  | -0.48715200 |
| AlCl <sub>3</sub> -C <sub>6</sub> H <sub>5</sub> CH <sub>2</sub> CH <sub>2</sub> OH |             |             |             |
| Al                                                                                  | 1.62112000  | -0.26571400 | 0.17755200  |
| Cl                                                                                  | 3.59721400  | 0.35666800  | 0.61488700  |
| Cl                                                                                  | 0.31912700  | -0.37792500 | 1.84488600  |
| Cl                                                                                  | 1.43623000  | -1.72592500 | -1.37045900 |
| C                                                                                   | 0.02741100  | 2.28682900  | -0.47598200 |
| H                                                                                   | 0.02193400  | 2.26392700  | 0.62103500  |
| H                                                                                   | 0.50902800  | 3.21372800  | -0.82187400 |
| O                                                                                   | 0.88339300  | 1.17725700  | -0.86217000 |
| H                                                                                   | 0.79026700  | 0.93292000  | -1.79792200 |
| C                                                                                   | -1.37834400 | 2.12600900  | -1.04447600 |
| H                                                                                   | -1.94099600 | 3.03186000  | -0.76542900 |
| H                                                                                   | -1.32154800 | 2.12635900  | -2.14803500 |
| C                                                                                   | -2.07806200 | 0.88380400  | -0.54693800 |
| C                                                                                   | -1.91154300 | -0.34029100 | -1.20705700 |
| C                                                                                   | -2.82199200 | 0.91451800  | 0.64033800  |
| C                                                                                   | -2.45262900 | -1.51446100 | -0.68052700 |
| H                                                                                   | -1.33695800 | -0.39105200 | -2.13534200 |
| C                                                                                   | -3.37585200 | -0.25444700 | 1.16261800  |

|                                                                                               |   |             |             |             |
|-----------------------------------------------------------------------------------------------|---|-------------|-------------|-------------|
|                                                                                               | H | -2.95622700 | 1.86213500  | 1.16969900  |
|                                                                                               | C | -3.18535600 | -1.47377400 | 0.50688500  |
|                                                                                               | H | -2.28867000 | -2.46286900 | -1.19616900 |
|                                                                                               | H | -3.94843500 | -0.21594100 | 2.09214400  |
|                                                                                               | H | -3.60558900 | -2.39186800 | 0.92357500  |
| <b>C<sub>6</sub>H<sub>5</sub>SCH<sub>3</sub></b>                                              |   |             |             |             |
|                                                                                               | S | 1.82391200  | -0.72004000 | -0.00002300 |
|                                                                                               | C | 2.71064600  | 0.86154100  | -0.00002600 |
|                                                                                               | H | 3.77856000  | 0.60270400  | -0.00009400 |
|                                                                                               | H | 2.48802700  | 1.45243700  | -0.90081600 |
|                                                                                               | H | 2.48798500  | 1.45239800  | 0.90076900  |
|                                                                                               | C | 0.11809700  | -0.23119000 | 0.00009600  |
|                                                                                               | C | -0.83122700 | -1.27075800 | 0.00002200  |
|                                                                                               | C | -0.32846200 | 1.09904100  | 0.00008700  |
|                                                                                               | C | -2.19379000 | -0.98129100 | -0.00001600 |
|                                                                                               | H | -0.49253700 | -2.31001500 | 0.00005500  |
|                                                                                               | C | -1.69906600 | 1.37790800  | -0.00001800 |
|                                                                                               | H | 0.38082000  | 1.92635700  | 0.00009000  |
|                                                                                               | C | -2.63820600 | 0.34601600  | -0.00004900 |
|                                                                                               | H | -2.91624300 | -1.80133000 | -0.00004300 |
|                                                                                               | H | -2.03027100 | 2.41955700  | -0.00006400 |
|                                                                                               | H | -3.70688800 | 0.57093700  | -0.00010300 |
| <b>4g (C<sub>6</sub>H<sub>5</sub>CH<sub>2</sub>CH<sub>2</sub>SC<sub>6</sub>H<sub>5</sub>)</b> |   |             |             |             |
|                                                                                               | C | -0.22231600 | -0.43936300 | 0.00015700  |
|                                                                                               | S | 1.27497100  | -1.48232500 | 0.00026400  |
|                                                                                               | H | -0.22279200 | 0.20773600  | 0.89106600  |
|                                                                                               | H | -0.22274600 | 0.20759900  | -0.89085100 |
|                                                                                               | C | -1.46551600 | -1.33762300 | 0.00020000  |
|                                                                                               | H | -1.43837300 | -1.99279700 | -0.88522200 |
|                                                                                               | H | -1.43844300 | -1.99262000 | 0.88575700  |
|                                                                                               | C | 2.60021900  | -0.30238300 | 0.00006600  |
|                                                                                               | C | 3.90615200  | -0.82820600 | -0.00016300 |
|                                                                                               | C | 2.42679800  | 1.09051200  | 0.00013400  |
|                                                                                               | C | 5.00929200  | 0.02249700  | -0.00029700 |
|                                                                                               | H | 4.05059200  | -1.91160800 | -0.00024900 |
|                                                                                               | C | 3.54185500  | 1.93472100  | -0.00002000 |
|                                                                                               | H | 1.42989400  | 1.53004200  | 0.00030900  |
|                                                                                               | C | 4.83527500  | 1.41124100  | -0.00022900 |
|                                                                                               | H | 6.01548300  | -0.40410900 | -0.00047300 |
|                                                                                               | H | 3.38934100  | 3.01705000  | 0.00002800  |

|   |             |             |             |
|---|-------------|-------------|-------------|
| H | 5.70121100  | 2.07670800  | -0.00034600 |
| C | -2.73237600 | -0.51497400 | 0.00006200  |
| C | -3.31829700 | -0.10132900 | 1.20553500  |
| C | -3.31841800 | -0.10191300 | -1.20554900 |
| C | -4.46092200 | 0.70217100  | 1.20779200  |
| H | -2.87453700 | -0.41800200 | 2.15379500  |
| C | -4.46104800 | 0.70158500  | -1.20807900 |
| H | -2.87475000 | -0.41903600 | -2.15370000 |
| C | -5.03575000 | 1.10685300  | -0.00021300 |
| H | -4.90640900 | 1.01074700  | 2.15676300  |
| H | -4.90662700 | 1.00970000  | -2.15715600 |
| H | -5.93107400 | 1.73306400  | -0.00031700 |

# TS1D

|    |             |             |             |
|----|-------------|-------------|-------------|
| Al | -2.44684400 | -1.58335400 | -0.16852900 |
| Cl | -0.89300300 | -3.01871600 | 0.36899400  |
| Cl | -2.76276200 | -0.25012000 | 1.50242100  |
| Cl | -4.17818300 | -2.51279300 | -0.97745100 |
| C  | 0.05124400  | 0.25063600  | -0.56458100 |
| H  | -0.60689800 | 0.36210500  | 0.29113200  |
| H  | 0.49554100  | -0.72207300 | -0.75659700 |
| S  | 1.80900500  | 0.58563700  | 1.06941900  |
| C  | 0.96844800  | -0.37897600 | 2.36342500  |
| H  | 0.21565100  | 0.29355100  | 2.79591100  |
| H  | 0.45407600  | -1.25280000 | 1.94161500  |
| H  | 1.70035700  | -0.67500000 | 3.12622500  |
| O  | -1.68724300 | -0.50625600 | -1.40106300 |
| H  | -1.54578600 | -0.88895300 | -2.27788800 |
| C  | 0.30365200  | 1.41970200  | -1.46736400 |
| H  | 1.36727300  | 1.44553500  | -1.75267500 |
| H  | -0.25125400 | 1.22708300  | -2.40083200 |
| C  | 2.99053000  | -0.56068400 | 0.38032200  |
| C  | 4.20097600  | -0.01988500 | -0.07683300 |
| C  | 2.71907200  | -1.92792800 | 0.22592000  |
| C  | 5.14093600  | -0.85006500 | -0.69113100 |
| H  | 4.40625000  | 1.04434800  | 0.05895700  |
| C  | 3.67351800  | -2.74845900 | -0.37926100 |
| H  | 1.77088400  | -2.35689000 | 0.55398100  |
| C  | 4.88121300  | -2.21523800 | -0.83960700 |
| H  | 6.08411100  | -0.42787500 | -1.04525700 |
| H  | 3.46201500  | -3.81356800 | -0.49703700 |
| H  | 5.62035300  | -2.86443500 | -1.31403500 |
| C  | -0.13541800 | 2.73852700  | -0.87243900 |

|   |             |            |             |
|---|-------------|------------|-------------|
| C | -1.44206700 | 2.88548400 | -0.38036300 |
| C | 0.75105900  | 3.81839200 | -0.78616700 |
| C | -1.84820300 | 4.09469400 | 0.18612500  |
| H | -2.13903400 | 2.04609300 | -0.43187000 |
| C | 0.34252000  | 5.03085400 | -0.22292500 |
| H | 1.77310900  | 3.70923100 | -1.15979800 |
| C | -0.95854700 | 5.17101300 | 0.26520700  |
| H | -2.86630200 | 4.19439600 | 0.56957000  |
| H | 1.04502100  | 5.86551400 | -0.16124700 |
| H | -1.27900500 | 6.11648300 | 0.70917600  |

Int1D

|    |             |             |             |
|----|-------------|-------------|-------------|
| Al | -3.28308900 | 0.37250300  | -0.32141200 |
| Cl | -2.70547300 | -1.75843000 | -0.08084100 |
| Cl | -2.75089800 | 1.33864400  | 1.57155800  |
| Cl | -5.37044200 | 0.51366000  | -0.75780100 |
| C  | 0.13579400  | 0.40849200  | -0.17369000 |
| H  | -0.40980700 | 1.23026300  | 0.30918800  |
| H  | -0.59359900 | -0.33518400 | -0.50961800 |
| S  | 1.08785900  | -0.34950900 | 1.20100600  |
| C  | -0.23032000 | -0.94404800 | 2.29836400  |
| H  | -0.75320300 | -0.04884200 | 2.66178900  |
| H  | -0.94505000 | -1.55851900 | 1.73460300  |
| H  | 0.26198700  | -1.49239400 | 3.11122100  |
| O  | -2.26187500 | 1.05574100  | -1.56476200 |
| H  | -2.71157100 | 1.33325200  | -2.36963300 |
| C  | 1.04336700  | 0.87564000  | -1.30029600 |
| H  | 1.48008300  | 0.00799300  | -1.81816200 |
| H  | 0.34799400  | 1.35837700  | -2.00573400 |
| C  | 1.73023100  | -1.84088800 | 0.44739800  |
| C  | 3.11339200  | -2.03483500 | 0.51686200  |
| C  | 0.88767900  | -2.74412200 | -0.21182100 |
| C  | 3.66696900  | -3.16818300 | -0.08399200 |
| H  | 3.74550200  | -1.30485200 | 1.02624400  |
| C  | 1.45850700  | -3.87115800 | -0.80497500 |
| H  | -0.19130500 | -2.57679700 | -0.27194500 |
| C  | 2.84049400  | -4.08307100 | -0.74181200 |
| H  | 4.74534100  | -3.33358000 | -0.03796800 |
| H  | 0.81525000  | -4.58566100 | -1.32263400 |
| H  | 3.27579900  | -4.96785900 | -1.21159800 |
| C  | 2.13065100  | 1.81827400  | -0.84408400 |
| C  | 1.80300900  | 3.07518400  | -0.31171800 |
| C  | 3.47844200  | 1.43607000  | -0.88769000 |

|      |    |             |             |             |
|------|----|-------------|-------------|-------------|
|      | C  | 2.79999300  | 3.92655900  | 0.16678900  |
|      | H  | 0.75597200  | 3.38942800  | -0.27676000 |
|      | C  | 4.47955000  | 2.28718400  | -0.40917000 |
|      | H  | 3.74570900  | 0.46166000  | -1.30599800 |
|      | C  | 4.14204900  | 3.53386000  | 0.12192900  |
|      | H  | 2.52932000  | 4.90359000  | 0.57412300  |
|      | H  | 5.52611400  | 1.97593400  | -0.45491200 |
|      | H  | 4.92186800  | 4.20126600  | 0.49602300  |
|      |    |             |             |             |
| TS2D |    |             |             |             |
|      | Al | 2.21329300  | -2.11020900 | 0.12774900  |
|      | Cl | 0.30208200  | -1.81076600 | -0.91725000 |
|      | Cl | 3.59277200  | -0.63950300 | -0.60548300 |
|      | Cl | 2.81552800  | -4.14944600 | 0.08993600  |
|      | C  | -1.66501100 | 1.26762600  | 0.40741500  |
|      | C  | 0.84328300  | 0.08878900  | 1.85029100  |
|      | H  | 1.72963200  | 0.54521600  | 1.41949400  |
|      | H  | 0.13870300  | -0.43281300 | 1.21495000  |
|      | S  | -0.36435900 | 2.04440200  | 1.45204100  |
|      | O  | 1.89475600  | -1.62620600 | 1.83733300  |
|      | H  | 1.52209400  | -2.30365400 | 2.41775200  |
|      | H  | -2.16736700 | 2.08149200  | -0.13427100 |
|      | H  | -1.17152600 | 0.60916400  | -0.32144500 |
|      | H  | 0.72277400  | 0.09041900  | 2.93069500  |
|      | C  | -2.65162800 | 0.48118900  | 1.27380600  |
|      | H  | -2.10856700 | -0.29566800 | 1.83653800  |
|      | H  | -3.11408400 | 1.15242700  | 2.01448300  |
|      | C  | 0.71522600  | 2.77277300  | 0.22478500  |
|      | C  | 1.05835600  | 4.12237800  | 0.38158200  |
|      | C  | 1.25032500  | 2.01249500  | -0.82394400 |
|      | C  | 1.94519500  | 4.71314500  | -0.52073200 |
|      | H  | 0.63256400  | 4.70138500  | 1.20357700  |
|      | C  | 2.13740200  | 2.61524100  | -1.71688800 |
|      | H  | 1.00768800  | 0.95639000  | -0.94775900 |
|      | C  | 2.48437700  | 3.96091000  | -1.56866900 |
|      | H  | 2.21586800  | 5.76467600  | -0.40203300 |
|      | H  | 2.57230400  | 2.01237000  | -2.51606200 |
|      | H  | 3.18352500  | 4.42394800  | -2.26856400 |
|      | C  | -3.71601600 | -0.16386300 | 0.41441400  |
|      | C  | -4.98749700 | 0.41336600  | 0.29458800  |
|      | C  | -3.42745800 | -1.32908200 | -0.31304900 |
|      | C  | -5.95678300 | -0.16316300 | -0.53061700 |
|      | H  | -5.22323800 | 1.32085500  | 0.85788500  |



|   |             |             |             |
|---|-------------|-------------|-------------|
| C | -4.39474300 | -1.90456800 | -1.13909700 |
| H | -2.43674300 | -1.78525500 | -0.24012000 |
| C | -5.66194700 | -1.32399600 | -1.24989400 |
| H | -6.94548000 | 0.29527400  | -0.60984400 |
| H | -4.15563500 | -2.81191600 | -1.69866300 |
| H | -6.41859600 | -1.77665900 | -1.89507600 |
